# Supplementary material for: Human Heart Explant-Derived Extracellular Vesicles: Characterization and Effects on the In Vitro Recellularization of Decellularized Heart Valves
Source: Int J Mol Sci. 2019 Mar 14;20(6):1279. doi: 10.3390/ijms20061279 (PMC6471048; doi:10.3390/ijms20061279)
Supplement: Supplementary file 1 [file ijms-20-01279-s001.zip › ijms-450832 Table S1.xlsx]

## Sheet: proteinGroups
Protein IDs	Majority protein IDs	Protein names	Gene names	Fasta headers	Mol. weight [kDa]	Q-value	Score	LFQ intensity rep#1	LFQ intensity rep#2	LFQ intensity rep#3
A0A024QZX5;A0A087X1N8;P35237	A0A024QZX5;A0A087X1N8;P35237	Serpin B6	SERPINB6	tr|A0A024QZX5|A0A024QZX5_HUMAN Serpin B6 OS=Homo sapiens GN=SERPINB6 PE=1 SV=1;tr|A0A087X1N8|A0A087X1N8_HUMAN Serpin B6 OS=Homo sapiens GN=SERPINB6 PE=1 SV=1;sp|P35237|SPB6_HUMAN Serpin B6 OS=Homo sapiens GN=SERPINB6 PE=1 SV=3	43024	0	15419	0	231700	270270
A0A024R4M0;P46781;B5MCT8;C9JM19;F2Z3C0;A8MXK4	A0A024R4M0;P46781;B5MCT8;C9JM19	40S ribosomal protein S9	RPS9	tr|A0A024R4M0|A0A024R4M0_HUMAN 40S ribosomal protein S9 OS=Homo sapiens GN=RPS9 PE=1 SV=1;sp|P46781|RS9_HUMAN 40S ribosomal protein S9 OS=Homo sapiens GN=RPS9 PE=1 SV=3;tr|B5MCT8|B5MCT8_HUMAN 40S ribosomal protein S9 OS=Homo sapiens GN=RPS9 PE=1 SV=1;tr|C9	22591	0	31822	5369200	4029900	5814600
A0A024R571;Q9H4M9;C9JC03;C9J2Z4;C9JDQ8;C9JIJ3;C9IZH1	A0A024R571;Q9H4M9;C9JC03;C9J2Z4	EH domain-containing protein 1	EHD1	tr|A0A024R571|A0A024R571_HUMAN EH domain-containing protein 1 OS=Homo sapiens GN=EHD1 PE=1 SV=1;sp|Q9H4M9|EHD1_HUMAN EH domain-containing protein 1 OS=Homo sapiens GN=EHD1 PE=1 SV=2;tr|C9JC03|C9JC03_HUMAN EH domain-containing protein 1 (Fragment) OS=Homo s	61927	0	122.75	1423200	3819500	2474500
A0A024R6I7;A0A0G2JRN3;G3V5R8;G3V2B9;G3V387;A0A0B4J278;G3V544	A0A024R6I7;A0A0G2JRN3		SERPINA1	tr|A0A024R6I7|A0A024R6I7_HUMAN Alpha-1-antitrypsin OS=Homo sapiens GN=SERPINA1 PE=1 SV=1;tr|A0A0G2JRN3|A0A0G2JRN3_HUMAN Alpha-1-antitrypsin OS=Homo sapiens GN=SERPINA1 PE=1 SV=1	46708	0	45051	855320	1696000	1403600
A0A075B6N9;A0A087X2C0;A0A087WYJ9;P01871;P04220	A0A075B6N9;A0A087X2C0;A0A087WYJ9;P01871	Ig mu chain C region	IGHM	tr|A0A075B6N9|A0A075B6N9_HUMAN Ig mu chain C region (Fragment) OS=Homo sapiens GN=IGHM PE=1 SV=2;tr|A0A087X2C0|A0A087X2C0_HUMAN Ig mu chain C region OS=Homo sapiens GN=IGHM PE=1 SV=1;tr|A0A087WYJ9|A0A087WYJ9_HUMAN Ig mu chain C region OS=Homo sapiens GN=IG	49439	0	70458	574430	284440	37571
A0A075B730;A0A087X1U6	A0A075B730;A0A087X1U6		EPPK1	tr|A0A075B730|A0A075B730_HUMAN Epiplakin OS=Homo sapiens GN=EPPK1 PE=1 SV=2;tr|A0A087X1U6|A0A087X1U6_HUMAN Epiplakin OS=Homo sapiens GN=EPPK1 PE=1 SV=1	553.12	0.0086888	14107	0	0	199210
A0A075B780;O14787;K7ENW1;K7ESC1	A0A075B780;O14787	Transportin-2	TNPO2	tr|A0A075B780|A0A075B780_HUMAN Transportin-2 OS=Homo sapiens GN=TNPO2 PE=1 SV=1;sp|O14787|TNPO2_HUMAN Transportin-2 OS=Homo sapiens GN=TNPO2 PE=1 SV=3	86.54	0	31356	0	0	15600
C9JIE4;A0A075B7B1;O15061	C9JIE4;A0A075B7B1;O15061	Synemin	SYNM	tr|C9JIE4|C9JIE4_HUMAN Synemin OS=Homo sapiens GN=SYNM PE=1 SV=2;tr|A0A075B7B1|A0A075B7B1_HUMAN Desmuslin, isoform CRA_a OS=Homo sapiens GN=SYNM PE=1 SV=1;sp|O15061|SYNEM_HUMAN Synemin OS=Homo sapiens GN=SYNM PE=1 SV=2	39069	0	5824	0	0	99017
U3KPR7;U3KQE2;K7EIV0;A0A075B7C0;K7EKD8;A0A0C4DGQ5;P04632;K7EM73;K7ELJ7;Q96L46	U3KPR7;U3KQE2;K7EIV0;A0A075B7C0;K7EKD8;A0A0C4DGQ5;P04632;K7EM73;K7ELJ7;Q96L46	Calpain small subunit 1;Calpain small subunit 2	CAPNS1;CAPNS2	tr|U3KPR7|U3KPR7_HUMAN Calpain small subunit 1 (Fragment) OS=Homo sapiens GN=CAPNS1 PE=1 SV=1;tr|U3KQE2|U3KQE2_HUMAN Calpain small subunit 1 (Fragment) OS=Homo sapiens GN=CAPNS1 PE=1 SV=1;tr|K7EIV0|K7EIV0_HUMAN Calpain small subunit 1 (Fragment) OS=Homo sa	11399	0	57588	0	135060	235530
K7ERP4;A0A087X2I2;A0A087WT12;P36969;A0A087X247;K7EKX7;R4GNE4;K7ENB4;K7EJ20	K7ERP4;A0A087X2I2;A0A087WT12;P36969;A0A087X247;K7EKX7;R4GNE4;K7ENB4;K7EJ20	Glutathione peroxidase;Phospholipid hydroperoxide glutathione peroxidase, mitochondrial	GPX4	tr|K7ERP4|K7ERP4_HUMAN Glutathione peroxidase (Fragment) OS=Homo sapiens GN=GPX4 PE=1 SV=1;tr|A0A087X2I2|A0A087X2I2_HUMAN Glutathione peroxidase OS=Homo sapiens GN=GPX4 PE=1 SV=1;tr|A0A087WT12|A0A087WT12_HUMAN Glutathione peroxidase OS=Homo sapiens GN=GPX4	17629	0	25306	0	0	264800
A0A087X0U3;A0A087WT87;P43003	A0A087X0U3;A0A087WT87;P43003	Amino acid transporter;Excitatory amino acid transporter 1	SLC1A3	tr|A0A087X0U3|A0A087X0U3_HUMAN Excitatory amino acid transporter 1 OS=Homo sapiens GN=SLC1A3 PE=1 SV=1;tr|A0A087WT87|A0A087WT87_HUMAN Excitatory amino acid transporter 1 OS=Homo sapiens GN=SLC1A3 PE=1 SV=1;sp|P43003|EAA1_HUMAN Excitatory amino acid transpo	47099	0.0008881	22916	0	5080	0
A0A087WUY3;H0Y931;A0A087WZ65;E9PCH6;A0A0U1RQN6;D6RHE1;A0A087WTF3;E9PHW9;I6L894;Q01484;Q12955	A0A087WUY3;H0Y931;A0A087WZ65;E9PCH6;A0A0U1RQN6;D6RHE1;A0A087WTF3;E9PHW9;I6L894;Q01484;Q12955	Ankyrin-2;Ankyrin-3	ANK3;ANK2	tr|A0A087WUY3|A0A087WUY3_HUMAN Ankyrin-3 OS=Homo sapiens GN=ANK3 PE=1 SV=1;tr|H0Y931|H0Y931_HUMAN Ankyrin-2 (Fragment) OS=Homo sapiens GN=ANK2 PE=1 SV=1;tr|A0A087WZ65|A0A087WZ65_HUMAN Ankyrin-3 (Fragment) OS=Homo sapiens GN=ANK3 PE=1 SV=1;tr|E9PCH6|E9PCH6_	90258	0.0008726	21798	0	0	35818
A0A087WTS8;A0A087WYC1;P34932	A0A087WTS8;A0A087WYC1;P34932	Heat shock 70 kDa protein 4	HSPA4	tr|A0A087WTS8|A0A087WTS8_HUMAN Heat shock 70 kDa protein 4 OS=Homo sapiens GN=HSPA4 PE=1 SV=1;tr|A0A087WYC1|A0A087WYC1_HUMAN Heat shock 70 kDa protein 4 OS=Homo sapiens GN=HSPA4 PE=1 SV=1;sp|P34932|HSP74_HUMAN Heat shock 70 kDa protein 4 OS=Homo sapiens GN	52599	0	72634	237340	401430	640960
A0A087WU65;Q9NRW7;B7Z7G7	A0A087WU65;Q9NRW7;B7Z7G7	Vacuolar protein sorting-associated protein 45	VPS45	tr|A0A087WU65|A0A087WU65_HUMAN Vacuolar protein sorting-associated protein 45 OS=Homo sapiens GN=VPS45 PE=1 SV=1;sp|Q9NRW7|VPS45_HUMAN Vacuolar protein sorting-associated protein 45 OS=Homo sapiens GN=VPS45 PE=1 SV=1;tr|B7Z7G7|B7Z7G7_HUMAN Vacuolar protein	50736	0	39578	0	0	22895
A0A087WUA1;F8W8T8;H0YGH5;O00763	A0A087WUA1;F8W8T8;H0YGH5;O00763	Acetyl-CoA carboxylase 2;Biotin carboxylase	ACACB	tr|A0A087WUA1|A0A087WUA1_HUMAN Acetyl-CoA carboxylase 2 (Fragment) OS=Homo sapiens GN=ACACB PE=1 SV=1;tr|F8W8T8|F8W8T8_HUMAN Acetyl-CoA carboxylase 2 OS=Homo sapiens GN=ACACB PE=1 SV=2;tr|H0YGH5|H0YGH5_HUMAN Acetyl-CoA carboxylase 2 (Fragment) OS=Homo sapi	12.48	0.00090827	24899	10999	0	0
A0A087WUA5;Q9H223	A0A087WUA5;Q9H223	EH domain-containing protein 4	EHD4	tr|A0A087WUA5|A0A087WUA5_HUMAN EH domain-containing protein 4 OS=Homo sapiens GN=EHD4 PE=1 SV=1;sp|Q9H223|EHD4_HUMAN EH domain-containing protein 4 OS=Homo sapiens GN=EHD4 PE=1 SV=1	61113	0	120.46	2043700	2196200	1869300
A0A087WUG2;Q8WUF5	A0A087WUG2;Q8WUF5	RelA-associated inhibitor	PPP1R13L	tr|A0A087WUG2|A0A087WUG2_HUMAN RelA-associated inhibitor OS=Homo sapiens GN=PPP1R13L PE=1 SV=1;sp|Q8WUF5|IASPP_HUMAN RelA-associated inhibitor OS=Homo sapiens GN=PPP1R13L PE=1 SV=4	38.05	0.0025021	17771	0	0	63773
D6RF44;D6RBQ9;H0YA96;D6RAF8;H0Y8G5;A0A087WUK2;Q14103;O14979	D6RF44;D6RBQ9;H0YA96;D6RAF8;H0Y8G5;A0A087WUK2;Q14103;O14979	Heterogeneous nuclear ribonucleoprotein D0;Heterogeneous nuclear ribonucleoprotein D-like	HNRNPD;HNRNPDL	tr|D6RF44|D6RF44_HUMAN Heterogeneous nuclear ribonucleoprotein D0 (Fragment) OS=Homo sapiens GN=HNRNPD PE=1 SV=7;tr|D6RBQ9|D6RBQ9_HUMAN Heterogeneous nuclear ribonucleoprotein D0 (Fragment) OS=Homo sapiens GN=HNRNPD PE=1 SV=1;tr|H0YA96|H0YA96_HUMAN Heterog	12.64	0.00087642	22035	0	0	35358
E9PJG8;H0YCY6;A0A087WUL0;Q3LXA3	E9PJG8;H0YCY6;A0A087WUL0;Q3LXA3	Bifunctional ATP-dependent dihydroxyacetone kinase/FAD-AMP lyase (cyclizing);ATP-dependent dihydroxyacetone kinase;FAD-AMP lyase (cyclizing)	TKFC;DAK	tr|E9PJG8|E9PJG8_HUMAN Triokinase/FMN cyclase (Fragment) OS=Homo sapiens GN=TKFC PE=1 SV=2;tr|H0YCY6|H0YCY6_HUMAN Triokinase/FMN cyclase (Fragment) OS=Homo sapiens GN=TKFC PE=1 SV=1;tr|A0A087WUL0|A0A087WUL0_HUMAN Triokinase/FMN cyclase OS=Homo sapiens GN=T	16469	0	45524	0	0	47912
A0A087WUQ6;P07203	A0A087WUQ6;P07203	Glutathione peroxidase;Glutathione peroxidase 1	GPX1	tr|A0A087WUQ6|A0A087WUQ6_HUMAN Glutathione peroxidase OS=Homo sapiens GN=GPX1 PE=1 SV=1;sp|P07203|GPX1_HUMAN Glutathione peroxidase 1 OS=Homo sapiens GN=GPX1 PE=1 SV=4	21938	0.0025042	17985	0	97267	155510
E7ETK0;A0A087WUS0;P62847	E7ETK0;A0A087WUS0;P62847	40S ribosomal protein S24	RPS24	tr|E7ETK0|E7ETK0_HUMAN 40S ribosomal protein S24 OS=Homo sapiens GN=RPS24 PE=1 SV=1;tr|A0A087WUS0|A0A087WUS0_HUMAN 40S ribosomal protein S24 OS=Homo sapiens GN=RPS24 PE=1 SV=1;sp|P62847|RS24_HUMAN 40S ribosomal protein S24 OS=Homo sapiens GN=RPS24 PE=1 SV=	15197	0	86671	0	112240	159190
A0A087WUV8;A0A087X2B5;P35613;R4GMX5;I3L192	A0A087WUV8;A0A087X2B5;P35613;R4GMX5;I3L192	Basigin	BSG	tr|A0A087WUV8|A0A087WUV8_HUMAN Basigin OS=Homo sapiens GN=BSG PE=1 SV=1;tr|A0A087X2B5|A0A087X2B5_HUMAN Basigin (Fragment) OS=Homo sapiens GN=BSG PE=1 SV=1;sp|P35613|BASI_HUMAN Basigin OS=Homo sapiens GN=BSG PE=1 SV=2;tr|R4GMX5|R4GMX5_HUMAN Basigin (Fragmen	20542	0	77951	956690	304570	0
A0A087WUZ3;Q01082;F8W6C1;A4QPE4;O15020	A0A087WUZ3;Q01082;F8W6C1	Spectrin beta chain, non-erythrocytic 1	SPTBN1	tr|A0A087WUZ3|A0A087WUZ3_HUMAN Spectrin beta chain, non-erythrocytic 1 OS=Homo sapiens GN=SPTBN1 PE=1 SV=1;sp|Q01082|SPTB2_HUMAN Spectrin beta chain, non-erythrocytic 1 OS=Homo sapiens GN=SPTBN1 PE=1 SV=2;tr|F8W6C1|F8W6C1_HUMAN Spectrin beta chain, non-ery	274.83	0	167.11	5141900	1690300	1345800
H7C123;H7C2C5;F8W7C6;A0A087WV22;X1WI28;P27635;H7C2U2;B8A6G2;A6QRI9;Q96L21	H7C123;H7C2C5;F8W7C6;A0A087WV22;X1WI28;P27635;H7C2U2;B8A6G2;A6QRI9;Q96L21	60S ribosomal protein L10;60S ribosomal protein L10-like	RPL10;RPL10L	tr|H7C123|H7C123_HUMAN 60S ribosomal protein L10 (Fragment) OS=Homo sapiens GN=RPL10 PE=1 SV=1;tr|H7C2C5|H7C2C5_HUMAN 60S ribosomal protein L10 (Fragment) OS=Homo sapiens GN=RPL10 PE=1 SV=1;tr|F8W7C6|F8W7C6_HUMAN 60S ribosomal protein L10 OS=Homo sapiens G	10028	0	25328	0	109220	217970
A0A0A0MS07;A0A0A0MS08;A0A087X1C7;A0A0G2JNK4;A0A087WV47;A0A087X079;A0A087WYC5;P01857;A0A0G2JN06;A0A0G2JPD4;A0A075B6N8;A0A087WXL8;A0A087WVW2;P01859;P01861;P01860	A0A0A0MS07;A0A0A0MS08;A0A087X1C7;A0A0G2JNK4;A0A087WV47;A0A087X079;A0A087WYC5;P01857;A0A0G2JN06;A0A0G2JPD4;A0A075B6N8;A0A087WXL8;A0A087WVW2;P01859;P01861;P01860	Ig gamma-1 chain C region;Ig gamma-2 chain C region;Ig gamma-4 chain C region;Ig gamma-3 chain C region	IGHG1;IGHG3;IGHG2;IGHG4	tr|A0A0A0MS07|A0A0A0MS07_HUMAN Ig gamma-1 chain C region (Fragment) OS=Homo sapiens GN=IGHG1 PE=1 SV=1;tr|A0A0A0MS08|A0A0A0MS08_HUMAN Ig gamma-1 chain C region (Fragment) OS=Homo sapiens GN=IGHG1 PE=1 SV=1;tr|A0A087X1C7|A0A087X1C7_HUMAN Ig gamma-1 chain C	31983	0	36068	941100	34305	0
A0A087WXQ5;K7EJM5;A0A087WV68;A0A087WX29;K7EN94;B1AKP7;G3V162;A0A087X260;A0A087WYY0;Q13148	A0A087WXQ5;K7EJM5;A0A087WV68;A0A087WX29;K7EN94;B1AKP7;G3V162;A0A087X260;A0A087WYY0;Q13148	TAR DNA-binding protein 43	TARDBP	tr|A0A087WXQ5|A0A087WXQ5_HUMAN TAR DNA-binding protein 43 (Fragment) OS=Homo sapiens GN=TARDBP PE=1 SV=1;tr|K7EJM5|K7EJM5_HUMAN TAR DNA-binding protein 43 (Fragment) OS=Homo sapiens GN=TARDBP PE=1 SV=1;tr|A0A087WV68|A0A087WV68_HUMAN TAR DNA-binding protein	22837	0	46745	0	0	30516
A0A087WVC4;A0A0A0MS54;P22694;B1APG1;B1APG0;B1APG2;B1APF8;B1APF9;B1APG3;B1APF7	A0A087WVC4;A0A0A0MS54;P22694	cAMP-dependent protein kinase catalytic subunit beta	PRKACB	tr|A0A087WVC4|A0A087WVC4_HUMAN cAMP-dependent protein kinase catalytic subunit beta OS=Homo sapiens GN=PRKACB PE=1 SV=1;tr|A0A0A0MS54|A0A0A0MS54_HUMAN cAMP-dependent protein kinase catalytic subunit beta OS=Homo sapiens GN=PRKACB PE=1 SV=1;sp|P22694|KAPCB_	39236	0	14852	0	285640	320370
A0A087WVD4;Q9HBK9	A0A087WVD4;Q9HBK9	Arsenite methyltransferase	AS3MT	tr|A0A087WVD4|A0A087WVD4_HUMAN Arsenite methyltransferase OS=Homo sapiens GN=AS3MT PE=1 SV=1;sp|Q9HBK9|AS3MT_HUMAN Arsenite methyltransferase OS=Homo sapiens GN=AS3MT PE=1 SV=3	37969	0.00091158	25079	0	0	38990
A0A087WVQ6;Q00610;J3KS13;P53675;A0A087WX41;K7EJJ5;J3KSQ2;J3QL20;J3KRF5;F5H5N6;A0A087WV74;A0A087WXH4	A0A087WVQ6;Q00610	Clathrin heavy chain;Clathrin heavy chain 1	CLTC	tr|A0A087WVQ6|A0A087WVQ6_HUMAN Clathrin heavy chain OS=Homo sapiens GN=CLTC PE=1 SV=1;sp|Q00610|CLH1_HUMAN Clathrin heavy chain 1 OS=Homo sapiens GN=CLTC PE=1 SV=5	192.06	0	323.31	18916000	20643000	18564000
A0A087WVS8;Q70IA6	A0A087WVS8;Q70IA6	MOB kinase activator 2	MOB2	tr|A0A087WVS8|A0A087WVS8_HUMAN MOB kinase activator 2 OS=Homo sapiens GN=MOB2 PE=1 SV=1;sp|Q70IA6|MOB2_HUMAN MOB kinase activator 2 OS=Homo sapiens GN=MOB2 PE=1 SV=1	26879	0.0025402	19306	0	0	264980
A0A087WVV1;P49721	A0A087WVV1;P49721	Proteasome subunit beta type-2	PSMB2	tr|A0A087WVV1|A0A087WVV1_HUMAN Proteasome subunit beta type-2 OS=Homo sapiens GN=PSMB2 PE=1 SV=1;sp|P49721|PSB2_HUMAN Proteasome subunit beta type-2 OS=Homo sapiens GN=PSMB2 PE=1 SV=1	9557	0	2535	0	0	29749
F8W0M9;C9JID8;A0A087WW14;Q0VDG4	F8W0M9;C9JID8;A0A087WW14;Q0VDG4	Secernin-3	SCRN3	tr|F8W0M9|F8W0M9_HUMAN Secernin-3 (Fragment) OS=Homo sapiens GN=SCRN3 PE=1 SV=1;tr|C9JID8|C9JID8_HUMAN Secernin-3 (Fragment) OS=Homo sapiens GN=SCRN3 PE=1 SV=1;tr|A0A087WW14|A0A087WW14_HUMAN Secernin-3 OS=Homo sapiens GN=SCRN3 PE=1 SV=1;sp|Q0VDG4|SCRN3_HUM	23602	0	2657	0	0	14324
A0A087WW40;Q9Y371	A0A087WW40;Q9Y371	Endophilin-B1	SH3GLB1	tr|A0A087WW40|A0A087WW40_HUMAN Endophilin-B1 OS=Homo sapiens GN=SH3GLB1 PE=1 SV=1;sp|Q9Y371|SHLB1_HUMAN Endophilin-B1 OS=Homo sapiens GN=SH3GLB1 PE=1 SV=1	44.26	0.0064257	15059	0	0	6880.7
A0A087WW66;Q99460;H7C378	A0A087WW66;Q99460	26S proteasome non-ATPase regulatory subunit 1	PSMD1	tr|A0A087WW66|A0A087WW66_HUMAN 26S proteasome non-ATPase regulatory subunit 1 OS=Homo sapiens GN=PSMD1 PE=1 SV=1;sp|Q99460|PSMD1_HUMAN 26S proteasome non-ATPase regulatory subunit 1 OS=Homo sapiens GN=PSMD1 PE=1 SV=2	105.85	0	23374	232180	322430	427160
A6NKE1;A0A087WWM0;O43617	A6NKE1;A0A087WWM0;O43617	Trafficking protein particle complex subunit 3	TRAPPC3	tr|A6NKE1|A6NKE1_HUMAN Trafficking protein particle complex subunit 3 OS=Homo sapiens GN=TRAPPC3 PE=1 SV=1;tr|A0A087WWM0|A0A087WWM0_HUMAN Trafficking protein particle complex subunit 3 OS=Homo sapiens GN=TRAPPC3 PE=1 SV=1;sp|O43617|TPPC3_HUMAN Trafficking	13343	0.00087566	2199	0	0	70937
A0A087WXX8;A0A087WWT1;P21912	A0A087WXX8;A0A087WWT1;P21912	Succinate dehydrogenase [ubiquinone] iron-sulfur subunit, mitochondrial	SDHB	tr|A0A087WXX8|A0A087WXX8_HUMAN Succinate dehydrogenase [ubiquinone] iron-sulfur subunit, mitochondrial (Fragment) OS=Homo sapiens GN=SDHB PE=1 SV=1;tr|A0A087WWT1|A0A087WWT1_HUMAN Succinate dehydrogenase [ubiquinone] iron-sulfur subunit, mitochondrial (Frag	14143	0.0087025	14174	0	47604	0
A0A087WX97;Q9BXK5	A0A087WX97;Q9BXK5	Bcl-2-like protein 13	BCL2L13	tr|A0A087WX97|A0A087WX97_HUMAN Bcl-2-like protein 13 OS=Homo sapiens GN=BCL2L13 PE=1 SV=1;sp|Q9BXK5|B2L13_HUMAN Bcl-2-like protein 13 OS=Homo sapiens GN=BCL2L13 PE=1 SV=1	54388	0.0064309	15101	0	0	28818
Q8N1B9;C9J6X0;A0A087WXC5;E7ESZ7;O95299	Q8N1B9;C9J6X0;A0A087WXC5;E7ESZ7;O95299	NADH dehydrogenase [ubiquinone] 1 alpha subcomplex subunit 10, mitochondrial	NDUFA10	tr|Q8N1B9|Q8N1B9_HUMAN NADH dehydrogenase (Ubiquinone) 1 alpha subcomplex, 10, 42kDa, isoform CRA_c OS=Homo sapiens GN=NDUFA10 PE=1 SV=1;tr|C9J6X0|C9J6X0_HUMAN NADH dehydrogenase [ubiquinone] 1 alpha subcomplex subunit 10, mitochondrial (Fragment) OS=Homo	22373	0	27575	0	0	31451
A0A087WXF1;Q99558	A0A087WXF1;Q99558	Mitogen-activated protein kinase kinase kinase 14	MAP3K14	tr|A0A087WXF1|A0A087WXF1_HUMAN Mitogen-activated protein kinase kinase kinase 14 OS=Homo sapiens GN=MAP3K14 PE=1 SV=1;sp|Q99558|M3K14_HUMAN Mitogen-activated protein kinase kinase kinase 14 OS=Homo sapiens GN=MAP3K14 PE=1 SV=2	17055	0.0024631	16293	0	0	299410
A0A087WXG2;H7C4I2;C9JE15;Q7Z695	A0A087WXG2;H7C4I2;C9JE15;Q7Z695	Uncharacterized aarF domain-containing protein kinase 2	ADCK2	tr|A0A087WXG2|A0A087WXG2_HUMAN Uncharacterized aarF domain-containing protein kinase 2 OS=Homo sapiens GN=ADCK2 PE=1 SV=1;tr|H7C4I2|H7C4I2_HUMAN Uncharacterized aarF domain-containing protein kinase 2 (Fragment) OS=Homo sapiens GN=ADCK2 PE=1 SV=1;tr|C9JE15	45122	0.0056726	15483	0	0	1865800
A0A087X2J4;B7Z879;A0A087WXL6;Q9H270	A0A087X2J4;B7Z879;A0A087WXL6;Q9H270	Vacuolar protein sorting-associated protein 11 homolog	VPS11	tr|A0A087X2J4|A0A087X2J4_HUMAN Vacuolar protein sorting-associated protein 11 homolog (Fragment) OS=Homo sapiens GN=VPS11 PE=1 SV=1;tr|B7Z879|B7Z879_HUMAN Vacuolar protein sorting-associated protein 11 homolog OS=Homo sapiens GN=VPS11 PE=1 SV=1;tr|A0A087WX	20654	0	2867	0	0	1771900
A0A087WXS7;O43681;K7ERW9	A0A087WXS7;O43681	ATPase ASNA1	ASNA1	tr|A0A087WXS7|A0A087WXS7_HUMAN ATPase ASNA1 OS=Homo sapiens GN=ASNA1 PE=1 SV=1;sp|O43681|ASNA_HUMAN ATPase ASNA1 OS=Homo sapiens GN=ASNA1 PE=1 SV=2	37119	0	9549	0	612340	672120
A0A087WXX9;P54646	A0A087WXX9;P54646	5-AMP-activated protein kinase catalytic subunit alpha-2	PRKAA2	tr|A0A087WXX9|A0A087WXX9_HUMAN 5-AMP-activated protein kinase catalytic subunit alpha-2 OS=Homo sapiens GN=PRKAA2 PE=1 SV=1;sp|P54646|AAPK2_HUMAN 5-AMP-activated protein kinase catalytic subunit alpha-2 OS=Homo sapiens GN=PRKAA2 PE=1 SV=2	62319	0	30217	0	99952	185420
Q6ICJ4;A0A087WY67;G9J6Q5;P0CG30;P0CG29	Q6ICJ4;A0A087WY67;G9J6Q5;P0CG30;P0CG29	Glutathione S-transferase theta-2B;Glutathione S-transferase theta-2	Em:AP000351.3;GSTT2;GSTT2B	tr|Q6ICJ4|Q6ICJ4_HUMAN Em:AP000351.3 protein OS=Homo sapiens GN=Em:AP000351.3 PE=2 SV=1;tr|A0A087WY67|A0A087WY67_HUMAN Glutathione S-transferase theta-2 OS=Homo sapiens GN=GSTT2 PE=3 SV=1;tr|G9J6Q5|G9J6Q5_HUMAN GSTT2 OS=Homo sapiens GN=GSTT2 PE=2 SV=1;sp|P	25948	0	23922	0	347460	110450
A0A087WY71;E9PFW3;Q96CW1;C9JTK4;C9JGT8;C9JJ47;C9JJD3;C9JPV8	A0A087WY71;E9PFW3;Q96CW1;C9JTK4;C9JGT8;C9JJ47;C9JJD3;C9JPV8	AP-2 complex subunit mu	AP2M1	tr|A0A087WY71|A0A087WY71_HUMAN AP-2 complex subunit mu OS=Homo sapiens GN=AP2M1 PE=1 SV=1;tr|E9PFW3|E9PFW3_HUMAN AP-2 complex subunit mu OS=Homo sapiens GN=AP2M1 PE=1 SV=1;sp|Q96CW1|AP2M1_HUMAN AP-2 complex subunit mu OS=Homo sapiens GN=AP2M1 PE=1 SV=2;tr|	49526	0	13866	611970	534110	593090
A0A087WYS1;E7EUC7;Q16851;C9JWG0;C9JVG3;C9JQU9;C9JNZ1;C9JTZ5;C9JUW1	A0A087WYS1;E7EUC7;Q16851	UTP--glucose-1-phosphate uridylyltransferase	UGP2	tr|A0A087WYS1|A0A087WYS1_HUMAN UTP--glucose-1-phosphate uridylyltransferase OS=Homo sapiens GN=UGP2 PE=1 SV=1;tr|E7EUC7|E7EUC7_HUMAN UTP--glucose-1-phosphate uridylyltransferase OS=Homo sapiens GN=UGP2 PE=1 SV=1;sp|Q16851|UGPA_HUMAN UTP--glucose-1-phosphat	56967	0	32134	1849300	608210	383150
A0A087WYU2;Q96S19	A0A087WYU2;Q96S19	UPF0585 protein C16orf13	C16orf13	tr|A0A087WYU2|A0A087WYU2_HUMAN UPF0585 protein C16orf13 OS=Homo sapiens GN=C16orf13 PE=1 SV=1;sp|Q96S19|CP013_HUMAN UPF0585 protein C16orf13 OS=Homo sapiens GN=C16orf13 PE=1 SV=2	20428	0.00087032	21666	0	61647	0
Q5VXJ5;A0A087WZC3;Q15431	Q5VXJ5;A0A087WZC3;Q15431	Synaptonemal complex protein 1	SYCP1	tr|Q5VXJ5|Q5VXJ5_HUMAN Synaptonemal complex protein 1 (Fragment) OS=Homo sapiens GN=SYCP1 PE=1 SV=1;tr|A0A087WZC3|A0A087WZC3_HUMAN Synaptonemal complex protein 1 OS=Homo sapiens GN=SYCP1 PE=1 SV=1;sp|Q15431|SYCP1_HUMAN Synaptonemal complex protein 1 OS=Hom	93115	0	25633	0	0	168990
A0A087WZH7;P29966	A0A087WZH7;P29966	Myristoylated alanine-rich C-kinase substrate	MARCKS	tr|A0A087WZH7|A0A087WZH7_HUMAN Myristoylated alanine-rich C-kinase substrate OS=Homo sapiens GN=MARCKS PE=1 SV=1;sp|P29966|MARCS_HUMAN Myristoylated alanine-rich C-kinase substrate OS=Homo sapiens GN=MARCKS PE=1 SV=4	31595	0	10927	426130	122610	125370
A0A087X2E5;A0A087WZN1;O43837	A0A087X2E5;A0A087WZN1;O43837	Isocitrate dehydrogenase [NAD] subunit, mitochondrial;Isocitrate dehydrogenase [NAD] subunit beta, mitochondrial	IDH3B	tr|A0A087X2E5|A0A087X2E5_HUMAN Isocitrate dehydrogenase [NAD] subunit, mitochondrial OS=Homo sapiens GN=IDH3B PE=1 SV=1;tr|A0A087WZN1|A0A087WZN1_HUMAN Isocitrate dehydrogenase [NAD] subunit, mitochondrial OS=Homo sapiens GN=IDH3B PE=1 SV=1;sp|O43837|IDH3B_	41219	0	48875	0	115540	0
A0A087WZW8;A0A087X1V9;P01834;A0A075B6H6;A0A0U1RRF4;A0A087WWV8	A0A087WZW8;A0A087X1V9;P01834;A0A075B6H6;A0A0U1RRF4;A0A087WWV8	Ig kappa chain C region	IGKV3-11;IGKC;IGKV1-8	tr|A0A087WZW8|A0A087WZW8_HUMAN Ig kappa chain C region OS=Homo sapiens GN=IGKC PE=1 SV=2;tr|A0A087X1V9|A0A087X1V9_HUMAN Ig kappa chain C region OS=Homo sapiens GN=IGKC PE=1 SV=3;sp|P01834|IGKC_HUMAN Ig kappa chain C region OS=Homo sapiens GN=IGKC PE=1 SV=1	12996	0	52936	0	0	56286
A0A087X020;Q9Y3A5;F8WE72	A0A087X020;Q9Y3A5	Ribosome maturation protein SBDS	SBDS	tr|A0A087X020|A0A087X020_HUMAN Ribosome maturation protein SBDS OS=Homo sapiens GN=SBDS PE=1 SV=1;sp|Q9Y3A5|SBDS_HUMAN Ribosome maturation protein SBDS OS=Homo sapiens GN=SBDS PE=1 SV=4	28864	0	24471	101570	449480	818470
A0A087X0I4;M0QXB4;O14579;M0R061	A0A087X0I4;M0QXB4;O14579;M0R061	Coatomer subunit epsilon	COPE	tr|A0A087X0I4|A0A087X0I4_HUMAN Coatomer subunit epsilon OS=Homo sapiens GN=COPE PE=1 SV=1;tr|M0QXB4|M0QXB4_HUMAN Coatomer protein complex, subunit epsilon, isoform CRA_g OS=Homo sapiens GN=COPE PE=1 SV=1;sp|O14579|COPE_HUMAN Coatomer subunit epsilon OS=Hom	34.51	0.0064205	15054	0	0	73869
K7EK17;K7EKG8;F5H6N2;H0YKJ3;F5H4F6;H0YNV4;A0A0A0MST9;E7ETY4;A0A0A0MQR8;A0A0A0MSZ1;A0A0A0MT23;J3KNR0;E9PC69;B4DIB3;A0A087X0I6;Q96L34;P27448;Q7KZI7;Q9P0L2	K7EK17;K7EKG8;F5H6N2;H0YKJ3;F5H4F6;H0YNV4;A0A0A0MST9;E7ETY4;A0A0A0MQR8;A0A0A0MSZ1;A0A0A0MT23;J3KNR0;E9PC69;B4DIB3;A0A087X0I6;Q96L34;P27448;Q7KZI7;Q9P0L2	MAP/microtubule affinity-regulating kinase 4;MAP/microtubule affinity-regulating kinase 3;Serine/threonine-protein kinase MARK2;Serine/threonine-protein kinase MARK1	MARK4;MARK2;MARK3;MARK1	tr|K7EK17|K7EK17_HUMAN MAP/microtubule affinity-regulating kinase 4 (Fragment) OS=Homo sapiens GN=MARK4 PE=1 SV=1;tr|K7EKG8|K7EKG8_HUMAN MAP/microtubule affinity-regulating kinase 4 (Fragment) OS=Homo sapiens GN=MARK4 PE=1 SV=1;tr|F5H6N2|F5H6N2_HUMAN Serin	72163	0.002457	1618	0	0	94421
A0A087X0K0;P39059	A0A087X0K0;P39059	Collagen alpha-1(XV) chain;Restin;Restin-2;Restin-3;Restin-4	COL15A1	tr|A0A087X0K0|A0A087X0K0_HUMAN Collagen alpha-1(XV) chain OS=Homo sapiens GN=COL15A1 PE=1 SV=1;sp|P39059|COFA1_HUMAN Collagen alpha-1(XV) chain OS=Homo sapiens GN=COL15A1 PE=1 SV=2	140.06	0	56965	0	0	20984
A0A087X0K1;Q9Y376	A0A087X0K1;Q9Y376	Calcium-binding protein 39	CAB39	tr|A0A087X0K1|A0A087X0K1_HUMAN Calcium-binding protein 39 OS=Homo sapiens GN=CAB39 PE=1 SV=1;sp|Q9Y376|CAB39_HUMAN Calcium-binding protein 39 OS=Homo sapiens GN=CAB39 PE=1 SV=1	39452	0.00088652	22865	0	0	9093.3
A0A087X0Q9;Q9BVL4	A0A087X0Q9;Q9BVL4	Selenoprotein O	SELO	tr|A0A087X0Q9|A0A087X0Q9_HUMAN Selenoprotein O OS=Homo sapiens GN=SELO PE=1 SV=1;sp|Q9BVL4|SELO_HUMAN Selenoprotein O OS=Homo sapiens GN=SELO PE=2 SV=3	73338	0.0092951	13332	0	5279.7	0
A0A087X0W7;A0A087WT95;P49753	A0A087X0W7;A0A087WT95;P49753	Acyl-coenzyme A thioesterase 2, mitochondrial	ACOT2	tr|A0A087X0W7|A0A087X0W7_HUMAN Acyl-coenzyme A thioesterase 2, mitochondrial OS=Homo sapiens GN=ACOT2 PE=1 SV=1;tr|A0A087WT95|A0A087WT95_HUMAN Acyl-coenzyme A thioesterase 2, mitochondrial OS=Homo sapiens GN=ACOT2 PE=1 SV=1;sp|P49753|ACOT2_HUMAN Acyl-coenz	46292	0	38507	0	0	103780
M0QY96;M0R2I7;M0QZM1;A0A087X0X3;P52272	M0QY96;M0R2I7;M0QZM1;A0A087X0X3;P52272	Heterogeneous nuclear ribonucleoprotein M	HNRNPM	tr|M0QY96|M0QY96_HUMAN Heterogeneous nuclear ribonucleoprotein M (Fragment) OS=Homo sapiens GN=HNRNPM PE=1 SV=1;tr|M0R2I7|M0R2I7_HUMAN Heterogeneous nuclear ribonucleoprotein M (Fragment) OS=Homo sapiens GN=HNRNPM PE=1 SV=1;tr|M0QZM1|M0QZM1_HUMAN Heterogen	12343	0.0024691	1651	227300	0	0
A0A0G2JP14;A0A087X137	A0A0G2JP14;A0A087X137		LAIR1	tr|A0A0G2JP14|A0A0G2JP14_HUMAN Leukocyte-associated immunoglobulin-like receptor 1 (Fragment) OS=Homo sapiens GN=LAIR1 PE=4 SV=1;tr|A0A087X137|A0A087X137_HUMAN Leukocyte-associated immunoglobulin-like receptor 1 (Fragment) OS=Homo sapiens GN=LAIR1 PE=4 SV=	85323	0.0024979	17429	0	0	413920
A0A087X1B9;P02792	A0A087X1B9;P02792	Ferritin;Ferritin light chain	FTL	tr|A0A087X1B9|A0A087X1B9_HUMAN Ferritin OS=Homo sapiens GN=FTL PE=1 SV=1;sp|P02792|FRIL_HUMAN Ferritin light chain OS=Homo sapiens GN=FTL PE=1 SV=2	21183	0	32828	0	212450	202520
F8WAS3;C9IZN5;A0A087X1G1;H7BYD0;Q16718	F8WAS3;C9IZN5;A0A087X1G1;H7BYD0;Q16718	NADH dehydrogenase [ubiquinone] 1 alpha subcomplex subunit 5	NDUFA5	tr|F8WAS3|F8WAS3_HUMAN NADH dehydrogenase [ubiquinone] 1 alpha subcomplex subunit 5 OS=Homo sapiens GN=NDUFA5 PE=1 SV=1;tr|C9IZN5|C9IZN5_HUMAN NADH dehydrogenase [ubiquinone] 1 alpha subcomplex subunit 5 (Fragment) OS=Homo sapiens GN=NDUFA5 PE=1 SV=1;tr|A0	78423	0.0024917	17232	0	0	11988
H7C3I1;F6VDH7;Q3KNR6;A0A087X1H6;Q8IZP2;P50502;Q8NFI4	H7C3I1;F6VDH7;Q3KNR6;A0A087X1H6;Q8IZP2;P50502;Q8NFI4	Putative protein FAM10A4;Hsc70-interacting protein;Putative protein FAM10A5	ST13;ST13P4;ST13P5	tr|H7C3I1|H7C3I1_HUMAN Hsc70-interacting protein (Fragment) OS=Homo sapiens GN=ST13 PE=1 SV=1;tr|F6VDH7|F6VDH7_HUMAN Hsc70-interacting protein (Fragment) OS=Homo sapiens GN=ST13 PE=1 SV=1;tr|Q3KNR6|Q3KNR6_HUMAN Hsc70-interacting protein OS=Homo sapiens GN=	16219	0	29942	496730	440170	749960
A0A087X1J7;P22352	A0A087X1J7;P22352	Glutathione peroxidase;Glutathione peroxidase 3	GPX3	tr|A0A087X1J7|A0A087X1J7_HUMAN Glutathione peroxidase OS=Homo sapiens GN=GPX3 PE=1 SV=1;sp|P22352|GPX3_HUMAN Glutathione peroxidase 3 OS=Homo sapiens GN=GPX3 PE=1 SV=2	25402	0	36064	0	0	108120
A0A087X1K9;E5RGR0;O75608;E5RJ48;B4DP64;E5RI35	A0A087X1K9;E5RGR0;O75608;E5RJ48;B4DP64	Acyl-protein thioesterase 1	LYPLA1	tr|A0A087X1K9|A0A087X1K9_HUMAN Acyl-protein thioesterase 1 OS=Homo sapiens GN=LYPLA1 PE=1 SV=1;tr|E5RGR0|E5RGR0_HUMAN Acyl-protein thioesterase 1 (Fragment) OS=Homo sapiens GN=LYPLA1 PE=1 SV=1;sp|O75608|LYPA1_HUMAN Acyl-protein thioesterase 1 OS=Homo sapie	17981	0	42611	414500	1085200	1246100
E9PK01;A0A087X1X7;E9PRY8;P29692;E9PQC9;E9PN91;H0YE58;E9PMW7;E9PIZ1;H0YE72;E9PPR1;E9PL12;E9PL71;E9PQ49;E9PI39;H0YCK7;E9PQZ1	E9PK01;A0A087X1X7;E9PRY8;P29692;E9PQC9;E9PN91;H0YE58;E9PMW7;E9PIZ1;H0YE72;E9PPR1;E9PL12;E9PL71;E9PQ49;E9PI39;H0YCK7;E9PQZ1	Elongation factor 1-delta	EEF1D	tr|E9PK01|E9PK01_HUMAN Elongation factor 1-delta (Fragment) OS=Homo sapiens GN=EEF1D PE=1 SV=1;tr|A0A087X1X7|A0A087X1X7_HUMAN Elongation factor 1-delta OS=Homo sapiens GN=EEF1D PE=1 SV=1;tr|E9PRY8|E9PRY8_HUMAN Elongation factor 1-delta OS=Homo sapiens GN=E	28821	0	14616	0	0	75714
A0A087X1Z3;Q9UL46;H0YM70	A0A087X1Z3;Q9UL46;H0YM70	Proteasome activator complex subunit 2	PSME2	tr|A0A087X1Z3|A0A087X1Z3_HUMAN Proteasome activator complex subunit 2 OS=Homo sapiens GN=PSME2 PE=1 SV=1;sp|Q9UL46|PSME2_HUMAN Proteasome activator complex subunit 2 OS=Homo sapiens GN=PSME2 PE=1 SV=4;tr|H0YM70|H0YM70_HUMAN Proteasome activator complex sub	29126	0	79863	0	19734	24475
A0A087X253;P63010;A0A087WYD1;A0A087WU93;A0A087WZQ6;K7EJX1;K7EN71;K7ERB2	A0A087X253;P63010;A0A087WYD1;A0A087WU93;A0A087WZQ6	AP-2 complex subunit beta	AP2B1	tr|A0A087X253|A0A087X253_HUMAN AP-2 complex subunit beta OS=Homo sapiens GN=AP2B1 PE=1 SV=1;sp|P63010|AP2B1_HUMAN AP-2 complex subunit beta OS=Homo sapiens GN=AP2B1 PE=1 SV=1;tr|A0A087WYD1|A0A087WYD1_HUMAN AP-2 complex subunit beta (Fragment) OS=Homo sapie	101.33	0	62907	1200500	1645300	1440300
A0A087X256;Q2M389;F8VYH7	A0A087X256;Q2M389	WASH complex subunit 7	KIAA1033	tr|A0A087X256|A0A087X256_HUMAN WASH complex subunit 7 OS=Homo sapiens GN=KIAA1033 PE=1 SV=1;sp|Q2M389|WASH7_HUMAN WASH complex subunit 7 OS=Homo sapiens GN=KIAA1033 PE=1 SV=2	136.5	0	3.37	0	23678	28930
A0A087X279;P09913	A0A087X279;P09913	Interferon-induced protein with tetratricopeptide repeats 2	IFIT2	tr|A0A087X279|A0A087X279_HUMAN Interferon-induced protein with tetratricopeptide repeats 2 OS=Homo sapiens GN=IFIT2 PE=1 SV=1;sp|P09913|IFIT2_HUMAN Interferon-induced protein with tetratricopeptide repeats 2 OS=Homo sapiens GN=IFIT2 PE=1 SV=1	55984	0	38128	0	0	231240
F1T0B3;A0A087X2G1;Q92499	F1T0B3;A0A087X2G1;Q92499	ATP-dependent RNA helicase DDX1	DDX1	tr|F1T0B3|F1T0B3_HUMAN ATP-dependent RNA helicase DDX1 OS=Homo sapiens GN=DDX1 PE=1 SV=1;tr|A0A087X2G1|A0A087X2G1_HUMAN ATP-dependent RNA helicase DDX1 OS=Homo sapiens GN=DDX1 PE=1 SV=1;sp|Q92499|DDX1_HUMAN ATP-dependent RNA helicase DDX1 OS=Homo sapiens G	73915	0	25466	549640	359490	446780
A0A087X2I1;P62333;H0YJC0;H0YJS8;H0YJE9;H0YJT1	A0A087X2I1;P62333;H0YJC0;H0YJS8	26S protease regulatory subunit 10B	PSMC6	tr|A0A087X2I1|A0A087X2I1_HUMAN 26S protease regulatory subunit 10B OS=Homo sapiens GN=PSMC6 PE=1 SV=1;sp|P62333|PRS10_HUMAN 26S protease regulatory subunit 10B OS=Homo sapiens GN=PSMC6 PE=1 SV=1;tr|H0YJC0|H0YJC0_HUMAN 26S protease regulatory subunit 10B (F	45796	0	26999	97396	472740	581680
C9JFE4;A0A096LP07;A0A096LPJ3;A8K070;Q13098;J3QQX0	C9JFE4;A0A096LP07;A0A096LPJ3;A8K070;Q13098	COP9 signalosome complex subunit 1	GPS1	tr|C9JFE4|C9JFE4_HUMAN COP9 signalosome complex subunit 1 OS=Homo sapiens GN=GPS1 PE=1 SV=2;tr|A0A096LP07|A0A096LP07_HUMAN COP9 signalosome complex subunit 1 OS=Homo sapiens GN=GPS1 PE=1 SV=1;tr|A0A096LPJ3|A0A096LPJ3_HUMAN COP9 signalosome complex subunit	53371	0	70419	0	356800	406040
A0A096LPE2;E9PR14;G3V1D9;E9PQD6;P0DJI9;P0DJI8;P35542	A0A096LPE2;E9PR14;G3V1D9;E9PQD6;P0DJI9;P0DJI8;P35542	Serum amyloid A protein;Serum amyloid A-2 protein;Serum amyloid A-1 protein;Amyloid protein A;Serum amyloid protein A(2-104);Serum amyloid protein A(3-104);Serum amyloid protein A(2-103);Serum amyloid protein A(2-102);Serum amyloid protein A(4-101);Serum amyloid A-4 protein	SAA2-SAA4;SAA2;SAA1;SAA4	tr|A0A096LPE2|A0A096LPE2_HUMAN Protein SAA2-SAA4 OS=Homo sapiens GN=SAA2-SAA4 PE=4 SV=1;tr|E9PR14|E9PR14_HUMAN Serum amyloid A protein OS=Homo sapiens GN=SAA2 PE=3 SV=1;tr|G3V1D9|G3V1D9_HUMAN Serum amyloid A protein OS=Homo sapiens GN=SAA2 PE=3 SV=1;tr|E9P	23353	0	46069	0	54047	0
A8MXZ9;A0A0A0MQU5;Q14896;F5GZR4;Q14324	A8MXZ9;A0A0A0MQU5;Q14896;F5GZR4	Myosin-binding protein C, cardiac-type	MYBPC3	tr|A8MXZ9|A8MXZ9_HUMAN Myosin-binding protein C, cardiac-type OS=Homo sapiens GN=MYBPC3 PE=1 SV=1;tr|A0A0A0MQU5|A0A0A0MQU5_HUMAN Myosin-binding protein C, cardiac-type OS=Homo sapiens GN=MYBPC3 PE=1 SV=1;sp|Q14896|MYPC3_HUMAN Myosin-binding protein C, card	140.66	0	323.31	255450000	150340000	149200000
A0A0A0MR02;P45880;A2A3S1;Q5JSD2;Q5JSD1	A0A0A0MR02;P45880	Voltage-dependent anion-selective channel protein 2	VDAC2	tr|A0A0A0MR02|A0A0A0MR02_HUMAN Voltage-dependent anion-selective channel protein 2 (Fragment) OS=Homo sapiens GN=VDAC2 PE=1 SV=1;sp|P45880|VDAC2_HUMAN Voltage-dependent anion-selective channel protein 2 OS=Homo sapiens GN=VDAC2 PE=1 SV=2	30348	0	67531	197890	430330	217220
A0A0A0MR50;Q13619;A6NE76;A0A087WWN2	A0A0A0MR50;Q13619	Cullin-4A	CUL4A	tr|A0A0A0MR50|A0A0A0MR50_HUMAN Cullin-4A OS=Homo sapiens GN=CUL4A PE=1 SV=1;sp|Q13619|CUL4A_HUMAN Cullin-4A OS=Homo sapiens GN=CUL4A PE=1 SV=3	77719	0	33119	134890	327810	435840
A0A0A0MRD9;H3BS21;A0A087WU08;A0A0C4DGL8;J3QLC9;J3QR68;H0Y300;P00739;P00738	A0A0A0MRD9;H3BS21;A0A087WU08;A0A0C4DGL8;J3QLC9;J3QR68;H0Y300;P00739;P00738	Haptoglobin-related protein;Haptoglobin;Haptoglobin alpha chain;Haptoglobin beta chain	HPR;HP	tr|A0A0A0MRD9|A0A0A0MRD9_HUMAN Haptoglobin-related protein OS=Homo sapiens GN=HPR PE=1 SV=1;tr|H3BS21|H3BS21_HUMAN Haptoglobin (Fragment) OS=Homo sapiens GN=HP PE=1 SV=1;tr|A0A087WU08|A0A087WU08_HUMAN Haptoglobin OS=Homo sapiens GN=HP PE=1 SV=1;tr|A0A0C4DG	31499	0	41807	0	15937	0
A0A0A0MRE1;B4DJ07;A0A0A0MSB8;Q9UPT5	A0A0A0MRE1;B4DJ07;A0A0A0MSB8;Q9UPT5	Exocyst complex component 7	EXOC7	tr|A0A0A0MRE1|A0A0A0MRE1_HUMAN Exocyst complex component 7 (Fragment) OS=Homo sapiens GN=EXOC7 PE=1 SV=1;tr|B4DJ07|B4DJ07_HUMAN Exocyst complex component 7 OS=Homo sapiens GN=EXOC7 PE=1 SV=1;tr|A0A0A0MSB8|A0A0A0MSB8_HUMAN Exocyst complex component 7 OS=Hom	70.2	0	26564	0	0	5376.3
G3V5X4;A0A0A0MRE3;Q8WXH0;A0A0C4DGK3	G3V5X4;A0A0A0MRE3;Q8WXH0;A0A0C4DGK3	Nesprin-2	SYNE2	tr|G3V5X4|G3V5X4_HUMAN Nesprin-2 OS=Homo sapiens GN=SYNE2 PE=1 SV=1;tr|A0A0A0MRE3|A0A0A0MRE3_HUMAN Nesprin-2 OS=Homo sapiens GN=SYNE2 PE=1 SV=1;sp|Q8WXH0|SYNE2_HUMAN Nesprin-2 OS=Homo sapiens GN=SYNE2 PE=1 SV=3;tr|A0A0C4DGK3|A0A0C4DGK3_HUMAN Nesprin-2 OS=H	787.71	0	31002	0	343350	229860
Q7Z554;E7EPW4;A0A0A0MRJ5;A0A0A0MRJ4;P45379;E7EPN8	Q7Z554;E7EPW4;A0A0A0MRJ5;A0A0A0MRJ4;P45379;E7EPN8	Troponin T, cardiac muscle	HNTN1;TNNT2	tr|Q7Z554|Q7Z554_HUMAN Troponin T cardiac isoform OS=Homo sapiens GN=HNTN1 PE=1 SV=1;tr|E7EPW4|E7EPW4_HUMAN Troponin T, cardiac muscle (Fragment) OS=Homo sapiens GN=TNNT2 PE=1 SV=1;tr|A0A0A0MRJ5|A0A0A0MRJ5_HUMAN Troponin T, cardiac muscle OS=Homo sapiens G	27529	0.00087873	22271	0	75171	77285
F6S8N6;A0A0A0MRJ6;H7BY58;P22061;C9J0F2	F6S8N6;A0A0A0MRJ6;H7BY58;P22061	Protein-L-isoaspartate O-methyltransferase;Protein-L-isoaspartate(D-aspartate) O-methyltransferase	PCMT1	tr|F6S8N6|F6S8N6_HUMAN Protein-L-isoaspartate(D-aspartate) O-methyltransferase OS=Homo sapiens GN=PCMT1 PE=1 SV=1;tr|A0A0A0MRJ6|A0A0A0MRJ6_HUMAN Protein-L-isoaspartate O-methyltransferase OS=Homo sapiens GN=PCMT1 PE=1 SV=1;tr|H7BY58|H7BY58_HUMAN Protein-L-	26626	0	26057	625920	219280	285230
A0A0A0MRN9;Q9GZV1;Q5T457	A0A0A0MRN9;Q9GZV1;Q5T457	Ankyrin repeat domain-containing protein 2	ANKRD2	tr|A0A0A0MRN9|A0A0A0MRN9_HUMAN Ankyrin repeat domain-containing protein 2 OS=Homo sapiens GN=ANKRD2 PE=1 SV=1;sp|Q9GZV1|ANKR2_HUMAN Ankyrin repeat domain-containing protein 2 OS=Homo sapiens GN=ANKRD2 PE=1 SV=3;tr|Q5T457|Q5T457_HUMAN Ankyrin repeat domain-	37121	0	134.59	120250	4714800	2832100
X6RA56;X6RCK5;A0A0A0MRV8;X6RLR1;O75935	X6RA56;X6RCK5;A0A0A0MRV8;X6RLR1;O75935	Dynactin subunit 3	DCTN3	tr|X6RA56|X6RA56_HUMAN Dynactin subunit 3 OS=Homo sapiens GN=DCTN3 PE=1 SV=1;tr|X6RCK5|X6RCK5_HUMAN Dynactin subunit 3 (Fragment) OS=Homo sapiens GN=DCTN3 PE=1 SV=1;tr|A0A0A0MRV8|A0A0A0MRV8_HUMAN Dynactin subunit 3 (Fragment) OS=Homo sapiens GN=DCTN3 PE=1	16091	0	34772	137670	258530	287990
A0A0A0MS69;Q14123	A0A0A0MS69;Q14123	Calcium/calmodulin-dependent 3,5-cyclic nucleotide phosphodiesterase 1C	PDE1C	tr|A0A0A0MS69|A0A0A0MS69_HUMAN Phosphodiesterase OS=Homo sapiens GN=PDE1C PE=1 SV=1;sp|Q14123|PDE1C_HUMAN Calcium/calmodulin-dependent 3,5-cyclic nucleotide phosphodiesterase 1C OS=Homo sapiens GN=PDE1C PE=1 SV=1	86924	0	13378	229700	615680	413590
A0A0A0MS98;P02730	A0A0A0MS98;P02730	Band 3 anion transport protein	SLC4A1	tr|A0A0A0MS98|A0A0A0MS98_HUMAN Band 3 anion transport protein OS=Homo sapiens GN=SLC4A1 PE=1 SV=1;sp|P02730|B3AT_HUMAN Band 3 anion transport protein OS=Homo sapiens GN=SLC4A1 PE=1 SV=3	60763	0	66733	0	62591	66157
E9PF18;A0A0A0MSE2;Q16836	E9PF18;A0A0A0MSE2;Q16836	Hydroxyacyl-coenzyme A dehydrogenase, mitochondrial	HADH	tr|E9PF18|E9PF18_HUMAN Hydroxyacyl-coenzyme A dehydrogenase, mitochondrial OS=Homo sapiens GN=HADH PE=1 SV=1;tr|A0A0A0MSE2|A0A0A0MSE2_HUMAN Hydroxyacyl-coenzyme A dehydrogenase, mitochondrial OS=Homo sapiens GN=HADH PE=1 SV=1;sp|Q16836|HCDH_HUMAN Hydroxyac	35236	0	29448	2259800	3555000	2404900
J3KNW4;A0A0A0MSG2;Q14192	J3KNW4;A0A0A0MSG2;Q14192	Four and a half LIM domains protein 2	FHL2	tr|J3KNW4|J3KNW4_HUMAN Four and a half LIM domains protein 2 OS=Homo sapiens GN=FHL2 PE=1 SV=1;tr|A0A0A0MSG2|A0A0A0MSG2_HUMAN Four and a half LIM domains protein 2 OS=Homo sapiens GN=FHL2 PE=1 SV=1;sp|Q14192|FHL2_HUMAN Four and a half LIM domains protein 2	44205	0	91775	4254500	2166300	1687600
A0A0A0MSI0;Q06830;A0A0A0MRQ5;H7C3T4;Q13162	A0A0A0MSI0;Q06830;A0A0A0MRQ5	Peroxiredoxin-1	PRDX1	tr|A0A0A0MSI0|A0A0A0MSI0_HUMAN Peroxiredoxin-1 (Fragment) OS=Homo sapiens GN=PRDX1 PE=1 SV=1;sp|Q06830|PRDX1_HUMAN Peroxiredoxin-1 OS=Homo sapiens GN=PRDX1 PE=1 SV=1;tr|A0A0A0MRQ5|A0A0A0MRQ5_HUMAN Peroxiredoxin-1 OS=Homo sapiens GN=PRDX1 PE=1 SV=1	18976	0	14678	2957400	1126600	1457700
F8W9B8;A0A0A0MSI8;O00471	F8W9B8;A0A0A0MSI8;O00471	Exocyst complex component 5	EXOC5	tr|F8W9B8|F8W9B8_HUMAN Exocyst complex component 5 OS=Homo sapiens GN=EXOC5 PE=1 SV=1;tr|A0A0A0MSI8|A0A0A0MSI8_HUMAN Exocyst complex component 5 OS=Homo sapiens GN=EXOC5 PE=1 SV=1;sp|O00471|EXOC5_HUMAN Exocyst complex component 5 OS=Homo sapiens GN=EXOC5 P	74.34	0	37057	0	170830	339460
A0A0A0MSM4;Q9C0D5	A0A0A0MSM4;Q9C0D5	Protein TANC1	TANC1	tr|A0A0A0MSM4|A0A0A0MSM4_HUMAN Protein TANC1 OS=Homo sapiens GN=TANC1 PE=1 SV=1;sp|Q9C0D5|TANC1_HUMAN Protein TANC1 OS=Homo sapiens GN=TANC1 PE=1 SV=3	50847	0	28192	0	0	8913.5
A0A0A0MSQ0;P13797;H7C4N2;C9JAM8;P13796;Q14651	A0A0A0MSQ0;P13797	Plastin-3	PLS3	tr|A0A0A0MSQ0|A0A0A0MSQ0_HUMAN Plastin-3 OS=Homo sapiens GN=PLS3 PE=1 SV=1;sp|P13797|PLST_HUMAN Plastin-3 OS=Homo sapiens GN=PLS3 PE=1 SV=4	69334	0	11394	0	147770	142310
D6RF25;A0A0A0MSR2;E7EV99;E7ENY0;P35611	D6RF25;A0A0A0MSR2;E7EV99;E7ENY0;P35611	Alpha-adducin	ADD1	tr|D6RF25|D6RF25_HUMAN Alpha-adducin (Fragment) OS=Homo sapiens GN=ADD1 PE=1 SV=7;tr|A0A0A0MSR2|A0A0A0MSR2_HUMAN Alpha-adducin OS=Homo sapiens GN=ADD1 PE=1 SV=1;tr|E7EV99|E7EV99_HUMAN Alpha-adducin OS=Homo sapiens GN=ADD1 PE=1 SV=1;tr|E7ENY0|E7ENY0_HUMAN A	15905	0.0024814	16985	321000	0	0
A0A0A0MSU4;O94911;A0A075B774;K7ELK9	A0A0A0MSU4;O94911;A0A075B774	ATP-binding cassette sub-family A member 8	ABCA8	tr|A0A0A0MSU4|A0A0A0MSU4_HUMAN ATP-binding cassette sub-family A member 8 OS=Homo sapiens GN=ABCA8 PE=1 SV=1;sp|O94911|ABCA8_HUMAN ATP-binding cassette sub-family A member 8 OS=Homo sapiens GN=ABCA8 PE=1 SV=3;tr|A0A075B774|A0A075B774_HUMAN ATP-binding cass	183.06	0	28426	842460	336990	295630
J3KR24;A0A0A0MSX9;P41252;Q5TCC6;Q5TCD1	J3KR24;A0A0A0MSX9;P41252	Isoleucine--tRNA ligase, cytoplasmic	IARS	tr|J3KR24|J3KR24_HUMAN Isoleucine--tRNA ligase, cytoplasmic OS=Homo sapiens GN=IARS PE=1 SV=1;tr|A0A0A0MSX9|A0A0A0MSX9_HUMAN Isoleucine--tRNA ligase, cytoplasmic OS=Homo sapiens GN=IARS PE=1 SV=1;sp|P41252|SYIC_HUMAN Isoleucine--tRNA ligase, cytoplasmic OS	131.76	0	21202	289810	351450	546610
M0R116;A0A0A0MT26;P13637;H0Y7C1;M0QXF2;Q13733;P20648;E9PRA5;P54707	M0R116;A0A0A0MT26;P13637	Sodium/potassium-transporting ATPase subunit alpha-3	ATP1A3	tr|M0R116|M0R116_HUMAN Sodium/potassium-transporting ATPase subunit alpha OS=Homo sapiens GN=ATP1A3 PE=1 SV=1;tr|A0A0A0MT26|A0A0A0MT26_HUMAN Sodium/potassium-transporting ATPase subunit alpha-3 OS=Homo sapiens GN=ATP1A3 PE=1 SV=1;sp|P13637|AT1A3_HUMAN Sodi	108.28	0	87801	0	0	228920
A0A0A0MT30;Q04828;A6NHU4;H0Y804;S4R3Z2;A0A0A0MSS8;P42330;S4R3D5;P17516	A0A0A0MT30;Q04828;A6NHU4;H0Y804;S4R3Z2;A0A0A0MSS8;P42330;S4R3D5	Aldo-keto reductase family 1 member C1;Aldo-keto reductase family 1 member C3	AKR1C1;AKR1C3	tr|A0A0A0MT30|A0A0A0MT30_HUMAN Aldo-keto reductase family 1 member C1 OS=Homo sapiens GN=AKR1C1 PE=1 SV=1;sp|Q04828|AK1C1_HUMAN Aldo-keto reductase family 1 member C1 OS=Homo sapiens GN=AKR1C1 PE=1 SV=1;tr|A6NHU4|A6NHU4_HUMAN Aldo-keto reductase family 1 m	37115	0	19692	950570	1554500	1093000
H3BUD4;A0A0A0MT40;Q15111	H3BUD4;A0A0A0MT40;Q15111	Phosphoinositide phospholipase C;Inactive phospholipase C-like protein 1	PLCL1	tr|H3BUD4|H3BUD4_HUMAN Phosphoinositide phospholipase C (Fragment) OS=Homo sapiens GN=PLCL1 PE=1 SV=1;tr|A0A0A0MT40|A0A0A0MT40_HUMAN Phosphoinositide phospholipase C OS=Homo sapiens GN=PLCL1 PE=1 SV=1;sp|Q15111|PLCL1_HUMAN Inactive phospholipase C-like pro	114.69	0	13636	0	167860	177160
A0A0A0MT83;P26440;H0YKV0;H0YLC3;H7C4G6;H0YN10	A0A0A0MT83;P26440;H0YKV0;H0YLC3;H7C4G6	Isovaleryl-CoA dehydrogenase, mitochondrial	IVD	tr|A0A0A0MT83|A0A0A0MT83_HUMAN Isovaleryl-CoA dehydrogenase, mitochondrial OS=Homo sapiens GN=IVD PE=1 SV=1;sp|P26440|IVD_HUMAN Isovaleryl-CoA dehydrogenase, mitochondrial OS=Homo sapiens GN=IVD PE=1 SV=1;tr|H0YKV0|H0YKV0_HUMAN Isovaleryl-CoA dehydrogenase	46.65	0	74925	0	372710	134930
A0A0A0MTH3;Q13418;A0A087WWY6	A0A0A0MTH3;Q13418	Integrin-linked protein kinase	ILK	tr|A0A0A0MTH3|A0A0A0MTH3_HUMAN Integrin-linked protein kinase OS=Homo sapiens GN=ILK PE=1 SV=1;sp|Q13418|ILK_HUMAN Integrin-linked protein kinase OS=Homo sapiens GN=ILK PE=1 SV=2	54611	0	22403	823250	843200	930390
Q5T2B5;A0A0A0MTN0;Q13617;Q5T2B7	Q5T2B5;A0A0A0MTN0;Q13617	Cullin-2	CUL2	tr|Q5T2B5|Q5T2B5_HUMAN Cullin-2 OS=Homo sapiens GN=CUL2 PE=1 SV=1;tr|A0A0A0MTN0|A0A0A0MTN0_HUMAN Cullin-2 OS=Homo sapiens GN=CUL2 PE=1 SV=1;sp|Q13617|CUL2_HUMAN Cullin-2 OS=Homo sapiens GN=CUL2 PE=1 SV=2	82358	0	79808	0	171090	242290
A0A0A0MTN3;P21266	A0A0A0MTN3;P21266	Glutathione S-transferase Mu 3	GSTM3	tr|A0A0A0MTN3|A0A0A0MTN3_HUMAN Glutathione S-transferase Mu 3 OS=Homo sapiens GN=GSTM3 PE=1 SV=1;sp|P21266|GSTM3_HUMAN Glutathione S-transferase Mu 3 OS=Homo sapiens GN=GSTM3 PE=1 SV=3	24914	0	161.02	1245100	9772500	12985000
A0A0A0MTR1;P55290;A0A087X0X6	A0A0A0MTR1;P55290;A0A087X0X6	Cadherin-13	CDH13	tr|A0A0A0MTR1|A0A0A0MTR1_HUMAN Cadherin-13 OS=Homo sapiens GN=CDH13 PE=1 SV=2;sp|P55290|CAD13_HUMAN Cadherin-13 OS=Homo sapiens GN=CDH13 PE=1 SV=1;tr|A0A087X0X6|A0A087X0X6_HUMAN Cadherin-13 OS=Homo sapiens GN=CDH13 PE=1 SV=1	76968	0	19595	3274000	369640	165710
A0A0A0MTS2;P06744;K7EQ48;A0A0J9YXP8;A0A0J9YX90;A0A0J9YYH3;K7EPY4;K7EP41;CON__Q3ZBD7;K7ELR7;K7ENA0;K7ERK8;K7ERC6;K7EIL4	A0A0A0MTS2;P06744;K7EQ48;A0A0J9YXP8;A0A0J9YX90;A0A0J9YYH3	Glucose-6-phosphate isomerase	GPI	tr|A0A0A0MTS2|A0A0A0MTS2_HUMAN Glucose-6-phosphate isomerase (Fragment) OS=Homo sapiens GN=GPI PE=1 SV=1;sp|P06744|G6PI_HUMAN Glucose-6-phosphate isomerase OS=Homo sapiens GN=GPI PE=1 SV=4;tr|K7EQ48|K7EQ48_HUMAN Glucose-6-phosphate isomerase OS=Homo sapien	64824	0	146.22	2729000	3105300	5219300
A0A0A0MTS7;Q8WZ42;A0A0A0MRA3;A0A0U1RRH3;A0A0C4DG59;H7C1P9;REV__A0A087WUH0;REV__P28715	A0A0A0MTS7;Q8WZ42;A0A0A0MRA3	Titin	TTN	tr|A0A0A0MTS7|A0A0A0MTS7_HUMAN Titin OS=Homo sapiens GN=TTN PE=1 SV=1;sp|Q8WZ42|TITIN_HUMAN Titin OS=Homo sapiens GN=TTN PE=1 SV=4;tr|A0A0A0MRA3|A0A0A0MRA3_HUMAN Titin OS=Homo sapiens GN=TTN PE=1 SV=1	3994.6	0	323.31	176930000	276030000	260420000
E9PHG3;A0A0A6YYB2;Q8NB12;C9JUP3	E9PHG3;A0A0A6YYB2;Q8NB12	Histone-lysine N-methyltransferase SMYD1	SMYD1	tr|E9PHG3|E9PHG3_HUMAN Histone-lysine N-methyltransferase SMYD1 OS=Homo sapiens GN=SMYD1 PE=1 SV=1;tr|A0A0A6YYB2|A0A0A6YYB2_HUMAN Histone-lysine N-methyltransferase SMYD1 OS=Homo sapiens GN=SMYD1 PE=1 SV=1;sp|Q8NB12|SMYD1_HUMAN Histone-lysine N-methyltrans	55047	0	72975	3557300	1638000	1627200
A0A0A6YYL2;P0DMN0;P0DMM9;H3BRT0;H3BPL6	A0A0A6YYL2;P0DMN0;P0DMM9;H3BRT0;H3BPL6	Sulfotransferase;Sulfotransferase 1A4;Sulfotransferase 1A3	SULT1A4;SULT1A3	tr|A0A0A6YYL2|A0A0A6YYL2_HUMAN Sulfotransferase OS=Homo sapiens GN=SULT1A4 PE=1 SV=1;sp|P0DMN0|ST1A4_HUMAN Sulfotransferase 1A4 OS=Homo sapiens GN=SULT1A4 PE=1 SV=1;sp|P0DMM9|ST1A3_HUMAN Sulfotransferase 1A3 OS=Homo sapiens GN=SULT1A3 PE=1 SV=1;tr|H3BRT0|H	34779	0.0024958	17346	0	0	21831
A0A0B4J1W3;Q9BXJ9;Q6N069	A0A0B4J1W3;Q9BXJ9	N-alpha-acetyltransferase 15, NatA auxiliary subunit	NAA15	tr|A0A0B4J1W3|A0A0B4J1W3_HUMAN N-alpha-acetyltransferase 15, NatA auxiliary subunit OS=Homo sapiens GN=NAA15 PE=1 SV=1;sp|Q9BXJ9|NAA15_HUMAN N-alpha-acetyltransferase 15, NatA auxiliary subunit OS=Homo sapiens GN=NAA15 PE=1 SV=1	101.2	0	20659	95102	482600	553860
F8VV32;A0A0B4J259;P61626	F8VV32;A0A0B4J259;P61626	Lysozyme;Lysozyme C	LYZ	tr|F8VV32|F8VV32_HUMAN Lysozyme C OS=Homo sapiens GN=LYZ PE=1 SV=1;tr|A0A0B4J259|A0A0B4J259_HUMAN Lysozyme C OS=Homo sapiens GN=LYZ PE=1 SV=1;sp|P61626|LYSC_HUMAN Lysozyme C OS=Homo sapiens GN=LYZ PE=1 SV=1	11488	0	13553	0	0	133030
A0A0B4J269;Q13509	A0A0B4J269;Q13509	Tubulin beta-3 chain	TUBB3	tr|A0A0B4J269|A0A0B4J269_HUMAN Uncharacterized protein OS=Homo sapiens PE=1 SV=1;sp|Q13509|TBB3_HUMAN Tubulin beta-3 chain OS=Homo sapiens GN=TUBB3 PE=1 SV=2	88381	0	48495	169620	426970	560520
A0A0B4J287;H3BM91;Q9H0A8;H3BPG2;H3BQF2	A0A0B4J287;H3BM91;Q9H0A8;H3BPG2;H3BQF2	COMM domain-containing protein 4	COMMD4	tr|A0A0B4J287|A0A0B4J287_HUMAN COMM domain-containing protein 4 OS=Homo sapiens GN=COMMD4 PE=1 SV=1;tr|H3BM91|H3BM91_HUMAN COMM domain-containing protein 4 (Fragment) OS=Homo sapiens GN=COMMD4 PE=1 SV=1;sp|Q9H0A8|COMD4_HUMAN COMM domain-containing protein	19382	0	16175	0	42649	63411
A0A0B4J296;B8ZZU8;I3L0M9;Q15370	A0A0B4J296;B8ZZU8;I3L0M9;Q15370	Transcription elongation factor B polypeptide 2	TCEB2	tr|A0A0B4J296|A0A0B4J296_HUMAN Transcription elongation factor B polypeptide 2 OS=Homo sapiens GN=TCEB2 PE=1 SV=1;tr|B8ZZU8|B8ZZU8_HUMAN Transcription elongation factor B (SIII), polypeptide 2 (18kDa, elongin B), isoform CRA_b OS=Homo sapiens GN=TCEB2 PE=1	77561	0	27854	0	268120	397370
Q5W0H4;A0A0B4J2C3;P13693;J3KPG2;E9PJF7;Q56UQ5;H0YCX0	Q5W0H4;A0A0B4J2C3;P13693;J3KPG2;E9PJF7;Q56UQ5	Translationally-controlled tumor protein;TPT1-like protein	TPT1	tr|Q5W0H4|Q5W0H4_HUMAN Translationally-controlled tumor protein OS=Homo sapiens GN=TPT1 PE=1 SV=1;tr|A0A0B4J2C3|A0A0B4J2C3_HUMAN Translationally-controlled tumor protein OS=Homo sapiens GN=TPT1 PE=1 SV=1;sp|P13693|TCTP_HUMAN Translationally-controlled tumo	21525	0	49055	139200	340670	297960
E7EWX8;A0A0C4DFN3;Q99685;H7C5K5;H7C599;H7C4E0;C9J8Q3	E7EWX8;A0A0C4DFN3;Q99685;H7C5K5;H7C599;H7C4E0	Monoglyceride lipase	MGLL	tr|E7EWX8|E7EWX8_HUMAN Monoglyceride lipase OS=Homo sapiens GN=MGLL PE=1 SV=1;tr|A0A0C4DFN3|A0A0C4DFN3_HUMAN Monoglyceride lipase OS=Homo sapiens GN=MGLL PE=1 SV=1;sp|Q99685|MGLL_HUMAN Monoglyceride lipase OS=Homo sapiens GN=MGLL PE=1 SV=2;tr|H7C5K5|H7C5K5	30691	0	10172	0	86303	107430
C9JG65;A0A0C4DFS8;P43490	C9JG65;A0A0C4DFS8;P43490	Nicotinamide phosphoribosyltransferase	NAMPT	tr|C9JG65|C9JG65_HUMAN Nicotinamide phosphoribosyltransferase (Fragment) OS=Homo sapiens GN=NAMPT PE=1 SV=1;tr|A0A0C4DFS8|A0A0C4DFS8_HUMAN Nicotinamide phosphoribosyltransferase OS=Homo sapiens GN=NAMPT PE=1 SV=1;sp|P43490|NAMPT_HUMAN Nicotinamide phosphor	10473	0	33196	0	0	10578
A0A0C4DFU6;Q96L92	A0A0C4DFU6;Q96L92	Sorting nexin-27	SNX27	tr|A0A0C4DFU6|A0A0C4DFU6_HUMAN Sorting nexin-27 OS=Homo sapiens GN=SNX27 PE=1 SV=1;sp|Q96L92|SNX27_HUMAN Sorting nexin-27 OS=Homo sapiens GN=SNX27 PE=1 SV=2	50879	0.0017256	21219	0	125580	111190
A0A0C4DFX2;Q5TBA9	A0A0C4DFX2;Q5TBA9	Protein furry homolog	FRY	tr|A0A0C4DFX2|A0A0C4DFX2_HUMAN Protein furry homolog OS=Homo sapiens GN=FRY PE=1 SV=1;sp|Q5TBA9|FRY_HUMAN Protein furry homolog OS=Homo sapiens GN=FRY PE=1 SV=1	338.17	0	29181	0	0	19863
C9J9K3;A0A0C4DG17;P08865;F8WD59	C9J9K3;A0A0C4DG17;P08865;F8WD59	40S ribosomal protein SA	RPSA	tr|C9J9K3|C9J9K3_HUMAN 40S ribosomal protein SA (Fragment) OS=Homo sapiens GN=RPSA PE=1 SV=7;tr|A0A0C4DG17|A0A0C4DG17_HUMAN 40S ribosomal protein SA OS=Homo sapiens GN=RPSA PE=1 SV=1;sp|P08865|RSSA_HUMAN 40S ribosomal protein SA OS=Homo sapiens GN=RPSA PE=	29505	0	104.01	3663600	3772900	4225300
A0A0C4DG54;Q5R372;A0A0U1RQY6;A0A0U1RRM5	A0A0C4DG54;Q5R372;A0A0U1RQY6;A0A0U1RRM5	Rab GTPase-activating protein 1-like	RABGAP1L	tr|A0A0C4DG54|A0A0C4DG54_HUMAN Rab GTPase-activating protein 1-like (Fragment) OS=Homo sapiens GN=RABGAP1L PE=1 SV=1;sp|Q5R372|RBG1L_HUMAN Rab GTPase-activating protein 1-like OS=Homo sapiens GN=RABGAP1L PE=1 SV=1;tr|A0A0U1RQY6|A0A0U1RQY6_HUMAN Rab GTPase-	64999	0	50774	0	69885	208200
A0A0C4DGH2;P62070;E9PK85;E9PQK5;E9PQC5;E9PQ87	A0A0C4DGH2;P62070;E9PK85	Ras-related protein R-Ras2	RRAS2	tr|A0A0C4DGH2|A0A0C4DGH2_HUMAN Ras-related protein R-Ras2 OS=Homo sapiens GN=RRAS2 PE=1 SV=1;sp|P62070|RRAS2_HUMAN Ras-related protein R-Ras2 OS=Homo sapiens GN=RRAS2 PE=1 SV=1;tr|E9PK85|E9PK85_HUMAN Ras-related protein R-Ras2 (Fragment) OS=Homo sapiens GN	23294	0	87111	0	303930	289520
I3L1H9;I3L3X0;A0A0C4DGN4;Q96DA0	I3L1H9;I3L3X0;A0A0C4DGN4;Q96DA0	Zymogen granule protein 16 homolog B	ZG16B	tr|I3L1H9|I3L1H9_HUMAN Zymogen granule protein 16 homolog B (Fragment) OS=Homo sapiens GN=ZG16B PE=1 SV=1;tr|I3L3X0|I3L3X0_HUMAN Zymogen granule protein 16 homolog B (Fragment) OS=Homo sapiens GN=ZG16B PE=1 SV=1;tr|A0A0C4DGN4|A0A0C4DGN4_HUMAN Zymogen granu	73695	0.00090909	24983	0	0	21834
R4GN43;A0A0C4DGS0;P56556	R4GN43;A0A0C4DGS0;P56556	NADH dehydrogenase [ubiquinone] 1 alpha subcomplex subunit 6	NDUFA6	tr|R4GN43|R4GN43_HUMAN NADH dehydrogenase [ubiquinone] 1 alpha subcomplex subunit 6 OS=Homo sapiens GN=NDUFA6 PE=1 SV=1;tr|A0A0C4DGS0|A0A0C4DGS0_HUMAN NADH dehydrogenase [ubiquinone] 1 alpha subcomplex subunit 6 OS=Homo sapiens GN=NDUFA6 PE=1 SV=1;sp|P5655	85099	0.0017036	19933	0	98504	0
H7BXK7;C9J7N5;A0A0C4DGW9;P50452;P50453;P30740;O75830	H7BXK7;C9J7N5;A0A0C4DGW9;P50452;P50453;P30740;O75830	Serpin B8;Serpin B9;Leukocyte elastase inhibitor;Serpin I2	SERPINB8;SERPINI2;SERPINB9;SERPINB1	tr|H7BXK7|H7BXK7_HUMAN Serpin B8 (Fragment) OS=Homo sapiens GN=SERPINB8 PE=1 SV=1;tr|C9J7N5|C9J7N5_HUMAN Serpin I2 (Fragment) OS=Homo sapiens GN=SERPINI2 PE=1 SV=1;tr|A0A0C4DGW9|A0A0C4DGW9_HUMAN Serpin I2 OS=Homo sapiens GN=SERPINI2 PE=1 SV=1;sp|P50452|SPB	21846	0	29334	0	0	39153
A0A0C4DGX4;Q13616	A0A0C4DGX4;Q13616	Cullin-1	CUL1	tr|A0A0C4DGX4|A0A0C4DGX4_HUMAN Cullin-1 OS=Homo sapiens GN=CUL1 PE=1 SV=1;sp|Q13616|CUL1_HUMAN Cullin-1 OS=Homo sapiens GN=CUL1 PE=1 SV=2	87387	0.0056911	15662	0	0	24512
A0A0C4DGZ5;P54577	A0A0C4DGZ5;P54577	Tyrosine--tRNA ligase;Tyrosine--tRNA ligase, cytoplasmic;Tyrosine--tRNA ligase, cytoplasmic, N-terminally processed	YARS	tr|A0A0C4DGZ5|A0A0C4DGZ5_HUMAN Tyrosine--tRNA ligase OS=Homo sapiens GN=YARS PE=1 SV=1;sp|P54577|SYYC_HUMAN Tyrosine--tRNA ligase, cytoplasmic OS=Homo sapiens GN=YARS PE=1 SV=4	43904	0.00087719	22071	0	0	32283
A0A0C4DGZ9;O14773	A0A0C4DGZ9;O14773	Tripeptidyl-peptidase 1	TPP1	tr|A0A0C4DGZ9|A0A0C4DGZ9_HUMAN Tripeptidyl-peptidase 1 OS=Homo sapiens GN=TPP1 PE=1 SV=1;sp|O14773|TPP1_HUMAN Tripeptidyl-peptidase 1 OS=Homo sapiens GN=TPP1 PE=1 SV=2	60457	0	13774	0	617190	635480
A0A0C4DH83;Q9NZN3	A0A0C4DH83;Q9NZN3	EH domain-containing protein 3	EHD3	tr|A0A0C4DH83|A0A0C4DH83_HUMAN EH domain-containing protein 3 OS=Homo sapiens GN=EHD3 PE=1 SV=1;sp|Q9NZN3|EHD3_HUMAN EH domain-containing protein 3 OS=Homo sapiens GN=EHD3 PE=1 SV=2	61895	0	13657	0	245780	399770
A0A0D9SFB3;A0A0D9SG12;A0A0D9SF53;O00571;O15523;A0A0J9YVQ7;A0A087WVZ1	A0A0D9SFB3;A0A0D9SG12;A0A0D9SF53;O00571;O15523	ATP-dependent RNA helicase DDX3X;ATP-dependent RNA helicase DDX3Y	DDX3X;DDX3Y	tr|A0A0D9SFB3|A0A0D9SFB3_HUMAN ATP-dependent RNA helicase DDX3X OS=Homo sapiens GN=DDX3X PE=1 SV=1;tr|A0A0D9SG12|A0A0D9SG12_HUMAN ATP-dependent RNA helicase DDX3X OS=Homo sapiens GN=DDX3X PE=1 SV=1;tr|A0A0D9SF53|A0A0D9SF53_HUMAN ATP-dependent RNA helicase	70839	0	46422	112790	278060	124400
A0A0D9SFR5;H3BQ06;Q9ULP9	A0A0D9SFR5;H3BQ06;Q9ULP9	TBC1 domain family member 24	TBC1D24	tr|A0A0D9SFR5|A0A0D9SFR5_HUMAN TBC1 domain family member 24 OS=Homo sapiens GN=TBC1D24 PE=4 SV=1;tr|H3BQ06|H3BQ06_HUMAN Uncharacterized protein OS=Homo sapiens PE=4 SV=1;sp|Q9ULP9|TBC24_HUMAN TBC1 domain family member 24 OS=Homo sapiens GN=TBC1D24 PE=1 SV=	38.37	0.0086614	14041	0	64168	0
A0A0D9SGF6;A0A0D9SF54;Q13813;A0A0D9SFH4;A0A0D9SFF6	A0A0D9SGF6;A0A0D9SF54;Q13813	Spectrin alpha chain, non-erythrocytic 1	SPTAN1	tr|A0A0D9SGF6|A0A0D9SGF6_HUMAN Spectrin alpha chain, non-erythrocytic 1 OS=Homo sapiens GN=SPTAN1 PE=1 SV=1;tr|A0A0D9SF54|A0A0D9SF54_HUMAN Spectrin alpha chain, non-erythrocytic 1 OS=Homo sapiens GN=SPTAN1 PE=1 SV=1;sp|Q13813|SPTN1_HUMAN Spectrin alpha cha	287.6	0	176.32	7978600	1874200	1224000
Q30118;A0A0G2JH46;A0A0G2JMH6;P01903	Q30118;A0A0G2JH46;A0A0G2JMH6;P01903	HLA class II histocompatibility antigen, DR alpha chain	HLA-DRA	tr|Q30118|Q30118_HUMAN HLA class II histocompatibility antigen, DR alpha chain OS=Homo sapiens GN=HLA-DRA PE=1 SV=1;tr|A0A0G2JH46|A0A0G2JH46_HUMAN HLA class II histocompatibility antigen, DR alpha chain OS=Homo sapiens GN=HLA-DRA PE=1 SV=1;tr|A0A0G2JMH6|A0	25859	0	26686	0	125980	0
Q5SRN7;A0A0G2JI36;A0A140T937;Q5SRN5;A0A0G2JIF2;A0A140T912;A0A0G2JL56;A0A140T930;P30455;P30447;P30443;P16188;P13746;P05534;P04439;Q29960;P30508;A0A140T975;A0A140T955;A0A140T941;A0A140T933;A0A140T8W8;Q9GJ45;A0A0G2JNY4;A0A140T9Z6;B0UXQ0;A0A140T9I0;A0A0G2JIF0;A0A140T9X5;A0A140T913;A0A140T8Y4;A0A0G2JH50;A0A0G2JPD3;A2BF26;P30512;P30459;P30457;P30456;P30453;P30450;P18462;P16190;P16189;P10316;P10314;P018…	Q5SRN7;A0A0G2JI36;A0A140T937;Q5SRN5;A0A0G2JIF2;A0A140T912;A0A0G2JL56;A0A140T930;P30455;P30447;P30443;P16188;P13746;P05534;P04439;Q29960;P30508;A0A140T975;A0A140T955;A0A140T941;A0A140T933;A0A140T8W8;Q9GJ45;A0A0G2JNY4;A0A140T9Z6;B0UXQ0;A0A140T9I0;A0A0G2JIF0;A0A140T9X5;A0A140T913;A0A140T8Y4;A0A0G2JH50;A0A0G2JPD3;A2BF26;P30512;P30459;P30457;P30456;P30453;P30450;P18462;P16190;P16189;P10316;P10314;P018…	HLA class I histocompatibility antigen, A-36 alpha chain;HLA class I histocompatibility antigen, A-23 alpha chain;HLA class I histocompatibility antigen, A-1 alpha chain;HLA class I histocompatibility antigen, A-30 alpha chain;HLA class I histocompatibility antigen, A-11 alpha chain;HLA class I histocompatibility antigen, A-24 alpha chain;HLA class I histocompatibility antigen, A-3 alpha chain;HL…	HLA-A;HLA-C	tr|Q5SRN7|Q5SRN7_HUMAN HLA class I histocompatibility antigen, A-3 alpha chain OS=Homo sapiens GN=HLA-A PE=1 SV=2;tr|A0A0G2JI36|A0A0G2JI36_HUMAN HLA class I histocompatibility antigen, A-3 alpha chain OS=Homo sapiens GN=HLA-A PE=1 SV=1;tr|A0A140T937|A0A140	34211	0.0024752	16845	1163100	0	0
A0A0G2JIW1;P0DMV9;P0DMV8;V9GZ37	A0A0G2JIW1;P0DMV9;P0DMV8;V9GZ37	Heat shock 70 kDa protein 1B;Heat shock 70 kDa protein 1A	HSPA1B;HSPA1A	tr|A0A0G2JIW1|A0A0G2JIW1_HUMAN Heat shock 70 kDa protein 1B OS=Homo sapiens GN=HSPA1B PE=1 SV=1;sp|P0DMV9|HS71B_HUMAN Heat shock 70 kDa protein 1B OS=Homo sapiens GN=HSPA1B PE=1 SV=1;sp|P0DMV8|HS71A_HUMAN Heat shock 70 kDa protein 1A OS=Homo sapiens GN=HSP	70108	0	196.63	26294000	23318000	14841000
A0A0G2JNJ0;A0A0G2JMW2;A0A0G2JMS9;A0A0G2JMR0;A0A140TA50;A0A0G2JKW5;P01911;B4DJG1;A0A140T9T0;A0A140T8Z1;H0Y7G7;A0A140T9P1;A0A140T9A5;A0A140T976;A0A140T966;A0A140T915;A0A140T8Z7;H0Y5P2;A0A140T9Y2;A0A140T9Y0;A0A140T9Q1;A0A140T9P7;A0A140T9I3;A0A140T928;A0A087WX18;A0A140T9S8;Q95IE3;Q5Y7A7;P20039;P01912	A0A0G2JNJ0;A0A0G2JMW2;A0A0G2JMS9;A0A0G2JMR0;A0A140TA50;A0A0G2JKW5;P01911;B4DJG1;A0A140T9T0;A0A140T8Z1;H0Y7G7;A0A140T9P1;A0A140T9A5;A0A140T976;A0A140T966;A0A140T915;A0A140T8Z7;H0Y5P2;A0A140T9Y2;A0A140T9Y0;A0A140T9Q1;A0A140T9P7;A0A140T9I3;A0A140T928;A0A087WX18;A0A140T9S8;Q95IE3;Q5Y7A7;P20039;P01912	HLA class II histocompatibility antigen, DRB1-15 beta chain;HLA class II histocompatibility antigen, DRB1-12 beta chain;HLA class II histocompatibility antigen, DRB1-13 beta chain;HLA class II histocompatibility antigen, DRB1-11 beta chain;HLA class II histocompatibility antigen, DRB1-3 chain	HLA-DRB1;HLA-DPB1	tr|A0A0G2JNJ0|A0A0G2JNJ0_HUMAN HLA class II histocompatibility antigen, DRB1-16 beta chain OS=Homo sapiens GN=HLA-DRB1 PE=1 SV=1;tr|A0A0G2JMW2|A0A0G2JMW2_HUMAN HLA class II histocompatibility antigen, DR beta 3 chain OS=Homo sapiens GN=HLA-DRB3 PE=1 SV=1;t	29996	0.0071485	14515	0	47191	0
A0A140TA49;A0A140TA44;A0A140TA32;A0A0G2JPR0;P0C0L4;F5GXS0;A0A140TA29;A0A0G2JL54;P0C0L5;CON__P01030;CON__ENSEMBL:ENSBTAP00000007350	A0A140TA49;A0A140TA44;A0A140TA32;A0A0G2JPR0;P0C0L4;F5GXS0;A0A140TA29;A0A0G2JL54;P0C0L5	Complement C4-A;Complement C4 beta chain;Complement C4-A alpha chain;C4a anaphylatoxin;C4b-A;C4d-A;Complement C4 gamma chain;Complement C4-B;Complement C4 beta chain;Complement C4-B alpha chain;C4a anaphylatoxin;C4b-B;C4d-B;Complement C4 gamma chain	C4A;C4B	tr|A0A140TA49|A0A140TA49_HUMAN Complement C4-A OS=Homo sapiens GN=C4A PE=1 SV=1;tr|A0A140TA44|A0A140TA44_HUMAN Complement C4-A OS=Homo sapiens GN=C4A PE=1 SV=1;tr|A0A140TA32|A0A140TA32_HUMAN Complement C4-A OS=Homo sapiens GN=C4A PE=1 SV=1;tr|A0A0G2JPR0|A0	187.79	0	25.27	0	156690	69839
A0A0G2JR96;A0A0G2JQT1	A0A0G2JR96;A0A0G2JQT1			tr|A0A0G2JR96|A0A0G2JR96_HUMAN Cytoplasmic FMR1-interacting protein 1 (Fragment) OS=Homo sapiens GN=CYFIP1 PE=1 SV=3;tr|A0A0G2JQT1|A0A0G2JQT1_HUMAN Cytoplasmic FMR1-interacting protein 1 (Fragment) OS=Homo sapiens GN=CYFIP1 PE=1 SV=3	100.45	0	60939	0	52386	0
A0A0G2JR38;E9PHT6;Q9NVE7;H0YA26;H0YA31;H0Y9E4	A0A0G2JR38;E9PHT6;Q9NVE7;H0YA26	Pantothenate kinase 4	PANK4	tr|A0A0G2JR38|A0A0G2JR38_HUMAN Pantothenate kinase 4 OS=Homo sapiens GN=PANK4 PE=1 SV=1;tr|E9PHT6|E9PHT6_HUMAN Pantothenate kinase 4 (Fragment) OS=Homo sapiens GN=PANK4 PE=1 SV=2;sp|Q9NVE7|PANK4_HUMAN Pantothenate kinase 4 OS=Homo sapiens GN=PANK4 PE=1 SV=	81385	0	16395	0	309250	737410
A0A0J9YWY6;O95425	A0A0J9YWY6;O95425	Supervillin	SVIL	tr|A0A0J9YWY6|A0A0J9YWY6_HUMAN Supervillin (Fragment) OS=Homo sapiens GN=SVIL PE=1 SV=1;sp|O95425|SVIL_HUMAN Supervillin OS=Homo sapiens GN=SVIL PE=1 SV=2	108.25	0	78195	0	83967	191150
A0A0M3HER1;A0A0J9YXC7;P48059	A0A0M3HER1;A0A0J9YXC7;P48059	LIM and senescent cell antigen-like-containing domain protein 1	LIMS1	tr|A0A0M3HER1|A0A0M3HER1_HUMAN LIM and senescent cell antigen-like-containing domain protein 1 (Fragment) OS=Homo sapiens GN=LIMS1 PE=1 SV=1;tr|A0A0J9YXC7|A0A0J9YXC7_HUMAN LIM and senescent cell antigen-like-containing domain protein 3 OS=Homo sapiens GN=L	24307	0	8.91	0	0	243360
A0A0J9YXZ5;P46940;H0YKA5	A0A0J9YXZ5;P46940	Ras GTPase-activating-like protein IQGAP1	IQGAP1	tr|A0A0J9YXZ5|A0A0J9YXZ5_HUMAN Ras GTPase-activating-like protein IQGAP1 OS=Homo sapiens GN=IQGAP1 PE=1 SV=1;sp|P46940|IQGA1_HUMAN Ras GTPase-activating-like protein IQGAP1 OS=Homo sapiens GN=IQGAP1 PE=1 SV=1	136	0	30061	0	297920	253070
A0A0U1RQD1;Q9NQ88	A0A0U1RQD1;Q9NQ88	Fructose-2,6-bisphosphatase TIGAR	TIGAR	tr|A0A0U1RQD1|A0A0U1RQD1_HUMAN Chromosome 12 open reading frame 5, isoform CRA_b OS=Homo sapiens GN=TIGAR PE=1 SV=1;sp|Q9NQ88|TIGAR_HUMAN Fructose-2,6-bisphosphatase TIGAR OS=Homo sapiens GN=TIGAR PE=1 SV=1	23585	0	48936	0	0	11596
A0A0U1RQK4;Q8NDY3;X6RL45	A0A0U1RQK4;Q8NDY3	[Protein ADP-ribosylarginine] hydrolase-like protein 1	ADPRHL1	tr|A0A0U1RQK4|A0A0U1RQK4_HUMAN [Protein ADP-ribosylarginine] hydrolase-like protein 1 OS=Homo sapiens GN=ADPRHL1 PE=1 SV=1;sp|Q8NDY3|ARHL1_HUMAN [Protein ADP-ribosylarginine] hydrolase-like protein 1 OS=Homo sapiens GN=ADPRHL1 PE=2 SV=1	211.81	0	83023	1964900	2936700	4504500
A0A0U1RQT9;C9JYN0;Q16563	A0A0U1RQT9;C9JYN0;Q16563	Synaptophysin-like protein 1	SYPL1	tr|A0A0U1RQT9|A0A0U1RQT9_HUMAN Synaptophysin-like protein 1 (Fragment) OS=Homo sapiens GN=SYPL1 PE=1 SV=1;tr|C9JYN0|C9JYN0_HUMAN Synaptophysin-like protein 1 OS=Homo sapiens GN=SYPL1 PE=1 SV=1;sp|Q16563|SYPL1_HUMAN Synaptophysin-like protein 1 OS=Homo sapi	14967	0	35896	0	0	107240
A0A0U1RR32;A0A0U1RRH7;Q99878;Q96KK5;Q9BTM1;Q16777;Q6FI13;P20671;P0C0S8;H0YFX9;Q93077;Q7L7L0;P04908;Q96QV6;P16104;C9J0D1;C9J386;Q8IUE6	A0A0U1RR32;A0A0U1RRH7;Q99878;Q96KK5;Q9BTM1;Q16777;Q6FI13;P20671;P0C0S8;H0YFX9;Q93077;Q7L7L0;P04908;Q96QV6;P16104	Histone H2A type 1-J;Histone H2A type 1-H;Histone H2A.J;Histone H2A type 2-C;Histone H2A type 2-A;Histone H2A type 1-D;Histone H2A type 1;Histone H2A;Histone H2A type 1-C;Histone H2A type 3;Histone H2A type 1-B/E;Histone H2A type 1-A;Histone H2AX	HIST1H2AJ;HIST1H2AH;H2AFJ;HIST2H2AC;HIST2H2AA3;HIST1H2AD;HIST1H2AG;HIST1H2AC;HIST3H2A;HIST1H2AB;HIST1H2AA;H2AFX	tr|A0A0U1RR32|A0A0U1RR32_HUMAN Histone H2A OS=Homo sapiens GN=hCG_2039566 PE=3 SV=1;tr|A0A0U1RRH7|A0A0U1RRH7_HUMAN Histone H2A OS=Homo sapiens PE=3 SV=1;sp|Q99878|H2A1J_HUMAN Histone H2A type 1-J OS=Homo sapiens GN=HIST1H2AJ PE=1 SV=3;sp|Q96KK5|H2A1H_HUMAN	18481	0	20486	17494000	2014900	12608000
A0A0U1RRB6;Q9Y2D4;J3QT38	A0A0U1RRB6;Q9Y2D4;J3QT38	Exocyst complex component 6B	EXOC6B	tr|A0A0U1RRB6|A0A0U1RRB6_HUMAN Exocyst complex component 6B OS=Homo sapiens GN=EXOC6B PE=1 SV=1;sp|Q9Y2D4|EXC6B_HUMAN Exocyst complex component 6B OS=Homo sapiens GN=EXOC6B PE=1 SV=3;tr|J3QT38|J3QT38_HUMAN Exocyst complex component 6B OS=Homo sapiens GN=EX	94685	0.0024938	17324	0	35043	31445
A0AVT1	A0AVT1	Ubiquitin-like modifier-activating enzyme 6	UBA6	sp|A0AVT1|UBA6_HUMAN Ubiquitin-like modifier-activating enzyme 6 OS=Homo sapiens GN=UBA6 PE=1 SV=1	117.97	0	54478	0	0	21078
A2A274;Q99798	A2A274;Q99798	Aconitate hydratase, mitochondrial	ACO2	tr|A2A274|A2A274_HUMAN Aconitate hydratase, mitochondrial OS=Homo sapiens GN=ACO2 PE=1 SV=1;sp|Q99798|ACON_HUMAN Aconitate hydratase, mitochondrial OS=Homo sapiens GN=ACO2 PE=1 SV=2	87819	0	278.7	7866200	13405000	5451100
B7ZLP8;A2RTX5;H0YKB9	B7ZLP8;A2RTX5	Probable threonine--tRNA ligase 2, cytoplasmic	TARSL2	tr|B7ZLP8|B7ZLP8_HUMAN Probable threonine--tRNA ligase 2, cytoplasmic OS=Homo sapiens GN=TARSL2 PE=1 SV=1;sp|A2RTX5|SYTC2_HUMAN Probable threonine--tRNA ligase 2, cytoplasmic OS=Homo sapiens GN=TARSL2 PE=1 SV=1	88743	0	15926	0	98563	133300
A3KMH1	A3KMH1	von Willebrand factor A domain-containing protein 8	VWA8	sp|A3KMH1|VWA8_HUMAN von Willebrand factor A domain-containing protein 8 OS=Homo sapiens GN=VWA8 PE=1 SV=2	214.82	0.0093458	13605	0	0	77883
A5YKK6	A5YKK6	CCR4-NOT transcription complex subunit 1	CNOT1	sp|A5YKK6|CNOT1_HUMAN CCR4-NOT transcription complex subunit 1 OS=Homo sapiens GN=CNOT1 PE=1 SV=2	266.94	0	9331	0	11838	36111
A6NDG6;H3BV17	A6NDG6	Phosphoglycolate phosphatase	PGP	sp|A6NDG6|PGP_HUMAN Glycerol-3-phosphate phosphatase OS=Homo sapiens GN=PGP PE=1 SV=1	34006	0	25332	0	299850	169350
A6NF51;O95861	A6NF51;O95861	3(2),5-bisphosphate nucleotidase 1	BPNT1	tr|A6NF51|A6NF51_HUMAN 3(2),5-bisphosphate nucleotidase 1 OS=Homo sapiens GN=BPNT1 PE=1 SV=2;sp|O95861|BPNT1_HUMAN 3(2),5-bisphosphate nucleotidase 1 OS=Homo sapiens GN=BPNT1 PE=1 SV=1	31707	0.0024793	16974	0	0	52370
H3BPX2;A6NGQ3;Q5VST9;A0A0A0MRI8;H3BQA7	H3BPX2;A6NGQ3;Q5VST9	Obscurin	OBSCN	tr|H3BPX2|H3BPX2_HUMAN Obscurin OS=Homo sapiens GN=OBSCN PE=1 SV=2;tr|A6NGQ3|A6NGQ3_HUMAN Obscurin OS=Homo sapiens GN=OBSCN PE=1 SV=4;sp|Q5VST9|OBSCN_HUMAN Obscurin OS=Homo sapiens GN=OBSCN PE=1 SV=3	972.99	0	23667	224700	489810	842180
A6NHZ5	A6NHZ5	Leucine-rich repeat-containing protein 14B	LRRC14B	sp|A6NHZ5|LR14B_HUMAN Leucine-rich repeat-containing protein 14B OS=Homo sapiens GN=LRRC14B PE=3 SV=3	56757	0	55624	0	35423	90111
A6NIR2;X6R7Y7;Q9Y547	A6NIR2;X6R7Y7;Q9Y547	Intraflagellar transport protein 25 homolog	HSPB11	tr|A6NIR2|A6NIR2_HUMAN Chromosome 1 open reading frame 41, isoform CRA_b OS=Homo sapiens GN=HSPB11 PE=1 SV=1;tr|X6R7Y7|X6R7Y7_HUMAN Intraflagellar transport protein 25 homolog OS=Homo sapiens GN=HSPB11 PE=1 SV=1;sp|Q9Y547|IFT25_HUMAN Intraflagellar transpo	13028	0.00089606	23709	0	0	43145
A6NIT2;A6NMN0;P46020	A6NIT2;A6NMN0;P46020	Phosphorylase b kinase regulatory subunit alpha, skeletal muscle isoform	PHKA1	tr|A6NIT2|A6NIT2_HUMAN Phosphorylase b kinase regulatory subunit alpha, skeletal muscle isoform OS=Homo sapiens GN=PHKA1 PE=1 SV=1;tr|A6NMN0|A6NMN0_HUMAN Phosphorylase b kinase regulatory subunit alpha, skeletal muscle isoform OS=Homo sapiens GN=PHKA1 PE=1	132.63	0	11855	0	185300	143140
A6NJA2;P54578	A6NJA2;P54578	Ubiquitin carboxyl-terminal hydrolase;Ubiquitin carboxyl-terminal hydrolase 14	USP14	tr|A6NJA2|A6NJA2_HUMAN Ubiquitin carboxyl-terminal hydrolase 14 OS=Homo sapiens GN=USP14 PE=1 SV=2;sp|P54578|UBP14_HUMAN Ubiquitin carboxyl-terminal hydrolase 14 OS=Homo sapiens GN=USP14 PE=1 SV=3	51086	0	25471	0	302170	474860
E9PM31;H0YEE2;E9PJK1;E9PRJ8;H0YDL9;H0YDJ9;E9PIF1;A6NMH8;P60033	E9PM31;H0YEE2;E9PJK1;E9PRJ8;H0YDL9;H0YDJ9;E9PIF1;A6NMH8;P60033	Tetraspanin;CD81 antigen	CD81	tr|E9PM31|E9PM31_HUMAN CD81 antigen (Fragment) OS=Homo sapiens GN=CD81 PE=1 SV=7;tr|H0YEE2|H0YEE2_HUMAN Tetraspanin (Fragment) OS=Homo sapiens GN=CD81 PE=1 SV=1;tr|E9PJK1|E9PJK1_HUMAN Tetraspanin OS=Homo sapiens GN=CD81 PE=1 SV=1;tr|E9PRJ8|E9PRJ8_HUMAN Tet	10099	0	18344	0	0	122610
A6NNI4;G8JLH6;P21926	A6NNI4;G8JLH6;P21926	Tetraspanin;CD9 antigen	CD9	tr|A6NNI4|A6NNI4_HUMAN Tetraspanin OS=Homo sapiens GN=CD9 PE=1 SV=1;tr|G8JLH6|G8JLH6_HUMAN Tetraspanin (Fragment) OS=Homo sapiens GN=CD9 PE=1 SV=1;sp|P21926|CD9_HUMAN CD9 antigen OS=Homo sapiens GN=CD9 PE=1 SV=4	17764	0	26099	0	0	845740
F6WIT2;A6PVN5;Q15257;Q5T949;Q5T948;A6PVN9;B7ZBQ0;A6PVN7;Q68CR8;A6PVN8;C9IZ76;A6PVN6	F6WIT2;A6PVN5;Q15257;Q5T949;Q5T948;A6PVN9	Serine/threonine-protein phosphatase 2A activator	PPP2R4	tr|F6WIT2|F6WIT2_HUMAN Serine/threonine-protein phosphatase 2A activator OS=Homo sapiens GN=PPP2R4 PE=1 SV=1;tr|A6PVN5|A6PVN5_HUMAN Serine/threonine-protein phosphatase 2A activator OS=Homo sapiens GN=PPP2R4 PE=1 SV=1;sp|Q15257|PTPA_HUMAN Serine/threonine-	32936	0	13179	30974	64451	220420
A8KAH6;Q16082	A8KAH6;Q16082	Heat shock protein beta-2	HSPB2	tr|A8KAH6|A8KAH6_HUMAN Heat shock 27kDa protein 2, isoform CRA_a OS=Homo sapiens GN=HSPB2 PE=1 SV=1;sp|Q16082|HSPB2_HUMAN Heat shock protein beta-2 OS=Homo sapiens GN=HSPB2 PE=1 SV=2	20232	0	12983	168830	341700	250060
M0QYV0;A8MT37;P49840	M0QYV0;A8MT37;P49840	Glycogen synthase kinase-3 alpha	GSK3A	tr|M0QYV0|M0QYV0_HUMAN Uncharacterized protein (Fragment) OS=Homo sapiens PE=3 SV=1;tr|A8MT37|A8MT37_HUMAN Glycogen synthase kinase-3 alpha OS=Homo sapiens GN=GSK3A PE=1 SV=2;sp|P49840|GSK3A_HUMAN Glycogen synthase kinase-3 alpha OS=Homo sapiens GN=GSK3A P	19274	0.004882	15716	0	0	36554
A8MTY9;O14972;A8MY26	A8MTY9;O14972;A8MY26	Down syndrome critical region protein 3	DSCR3	tr|A8MTY9|A8MTY9_HUMAN Down syndrome critical region protein 3 OS=Homo sapiens GN=DSCR3 PE=1 SV=1;sp|O14972|DSCR3_HUMAN Down syndrome critical region protein 3 OS=Homo sapiens GN=DSCR3 PE=2 SV=1;tr|A8MY26|A8MY26_HUMAN Down syndrome critical region protein	27958	0	49284	0	38942	64321
A8MU58;F8W950;Q13155	A8MU58;F8W950;Q13155	Aminoacyl tRNA synthase complex-interacting multifunctional protein 2	AIMP2	tr|A8MU58|A8MU58_HUMAN Aminoacyl tRNA synthase complex-interacting multifunctional protein 2 OS=Homo sapiens GN=AIMP2 PE=1 SV=2;tr|F8W950|F8W950_HUMAN Aminoacyl tRNA synthase complex-interacting multifunctional protein 2 OS=Homo sapiens GN=AIMP2 PE=1 SV=1;	26.76	0	96372	0	83456	98560
A8MUD9;P18124;C9JIJ5;C9JZ88	A8MUD9;P18124	60S ribosomal protein L7	RPL7	tr|A8MUD9|A8MUD9_HUMAN 60S ribosomal protein L7 OS=Homo sapiens GN=RPL7 PE=1 SV=1;sp|P18124|RL7_HUMAN 60S ribosomal protein L7 OS=Homo sapiens GN=RPL7 PE=1 SV=1	24433	0	22354	1576400	470020	350640
C9JN83;C9JW55;F8W808;A8MWP7;Q9BSU3;P41227	C9JN83;C9JW55;F8W808;A8MWP7;Q9BSU3;P41227	N-alpha-acetyltransferase 11;N-alpha-acetyltransferase 10	NAA10;NAA11	tr|C9JN83|C9JN83_HUMAN N-alpha-acetyltransferase 10 (Fragment) OS=Homo sapiens GN=NAA10 PE=1 SV=1;tr|C9JW55|C9JW55_HUMAN N-alpha-acetyltransferase 10 (Fragment) OS=Homo sapiens GN=NAA10 PE=1 SV=7;tr|F8W808|F8W808_HUMAN N-alpha-acetyltransferase 10 OS=Homo	16685	0.00088417	22711	0	0	92285
J3QR71;J3QRI9;J3QKW7;A8MZF9;P55039	J3QR71;J3QRI9;J3QKW7;A8MZF9;P55039	Developmentally-regulated GTP-binding protein 2	DRG2	tr|J3QR71|J3QR71_HUMAN Developmentally-regulated GTP-binding protein 2 (Fragment) OS=Homo sapiens GN=DRG2 PE=1 SV=1;tr|J3QRI9|J3QRI9_HUMAN Developmentally-regulated GTP-binding protein 2 OS=Homo sapiens GN=DRG2 PE=1 SV=1;tr|J3QKW7|J3QKW7_HUMAN Developmenta	16906	0	30576	0	0	22518
V9GZ68;V9GYF4;B0QY02;Q6UW50;B0QY01;O60784	V9GZ68;V9GYF4;B0QY02;Q6UW50;B0QY01;O60784	Target of Myb protein 1	TOM1	tr|V9GZ68|V9GZ68_HUMAN Target of Myb protein 1 (Fragment) OS=Homo sapiens GN=TOM1 PE=1 SV=1;tr|V9GYF4|V9GYF4_HUMAN Target of Myb protein 1 (Fragment) OS=Homo sapiens GN=TOM1 PE=1 SV=1;tr|B0QY02|B0QY02_HUMAN Target of Myb protein 1 (Fragment) OS=Homo sapien	14.16	0	44764	0	0	13239
B0QY89;Q9Y262;B0QY90;C9JHP4;C9K0Q7;H7C3A0;H0Y7E6	B0QY89;Q9Y262;B0QY90	Eukaryotic translation initiation factor 3 subunit L	EIF3L	tr|B0QY89|B0QY89_HUMAN Eukaryotic translation initiation factor 3 subunit L OS=Homo sapiens GN=EIF3L PE=1 SV=1;sp|Q9Y262|EIF3L_HUMAN Eukaryotic translation initiation factor 3 subunit L OS=Homo sapiens GN=EIF3L PE=1 SV=1;tr|B0QY90|B0QY90_HUMAN Eukaryotic t	70901	0	151.85	1783500	2178900	3150000
B0QYF8;P02144;F2Z2F1;Q8WVH6;B0QYF7;F2Z337	B0QYF8;P02144;F2Z2F1;Q8WVH6	Myoglobin	MB	tr|B0QYF8|B0QYF8_HUMAN Myoglobin (Fragment) OS=Homo sapiens GN=MB PE=1 SV=1;sp|P02144|MYG_HUMAN Myoglobin OS=Homo sapiens GN=MB PE=1 SV=2;tr|F2Z2F1|F2Z2F1_HUMAN Myoglobin (Fragment) OS=Homo sapiens GN=MB PE=1 SV=1;tr|Q8WVH6|Q8WVH6_HUMAN Myoglobin OS=Homo s	15988	0	25453	3092100	1111600	2314200
F2Z2V0;B0QZ18;Q99829;Q5JX56;Q5JX58;H0Y524;Q5JX59;Q5JX61;Q5JX60;Q5JX44;Q5JX52;Q5JX45;E7ENH5;A6PVH9	F2Z2V0;B0QZ18;Q99829;Q5JX56;Q5JX58;H0Y524;Q5JX59;Q5JX61;Q5JX60;Q5JX44;Q5JX52;Q5JX45;E7ENH5;A6PVH9	Copine-1	CPNE1	tr|F2Z2V0|F2Z2V0_HUMAN Copine-1 (Fragment) OS=Homo sapiens GN=CPNE1 PE=1 SV=1;tr|B0QZ18|B0QZ18_HUMAN Copine-1 OS=Homo sapiens GN=CPNE1 PE=1 SV=1;sp|Q99829|CPNE1_HUMAN Copine-1 OS=Homo sapiens GN=CPNE1 PE=1 SV=1;tr|Q5JX56|Q5JX56_HUMAN Copine-1 (Fragment) OS	58634	0	29815	136800	34175	0
B0YIW6;P48444;Q6P1Q5	B0YIW6;P48444;Q6P1Q5	Coatomer subunit delta	ARCN1	tr|B0YIW6|B0YIW6_HUMAN Archain 1, isoform CRA_a OS=Homo sapiens GN=ARCN1 PE=1 SV=1;sp|P48444|COPD_HUMAN Coatomer subunit delta OS=Homo sapiens GN=ARCN1 PE=1 SV=1;tr|Q6P1Q5|Q6P1Q5_HUMAN ARCN1 protein OS=Homo sapiens GN=ARCN1 PE=1 SV=1	61626	0	16582	0	93014	102230
B0YJC4;P08670;B0YJC5;Q5JVS8	B0YJC4;P08670;B0YJC5	Vimentin	VIM	tr|B0YJC4|B0YJC4_HUMAN Vimentin OS=Homo sapiens GN=VIM PE=1 SV=1;sp|P08670|VIME_HUMAN Vimentin OS=Homo sapiens GN=VIM PE=1 SV=4;tr|B0YJC5|B0YJC5_HUMAN Vimentin OS=Homo sapiens GN=VIM PE=1 SV=1	49653	0	25227	2552100	546940	404290
B1AKD8;Q5TZA2	B1AKD8;Q5TZA2	Rootletin	CROCC	tr|B1AKD8|B1AKD8_HUMAN Rootletin (Fragment) OS=Homo sapiens GN=CROCC PE=1 SV=2;sp|Q5TZA2|CROCC_HUMAN Rootletin OS=Homo sapiens GN=CROCC PE=1 SV=1	149.06	0.0056589	15382	0	130930	0
B1AKQ8;F6X3N5;F6UT28;P62873;E7EP32;F5H8J8;F5H100;F5H0S8;E9PCP0;P16520	B1AKQ8;F6X3N5;F6UT28;P62873;E7EP32;F5H8J8;F5H100;F5H0S8;E9PCP0;P16520	Guanine nucleotide-binding protein G(I)/G(S)/G(T) subunit beta-1;Guanine nucleotide-binding protein G(I)/G(S)/G(T) subunit beta-3	GNB1;GNB2;GNB3	tr|B1AKQ8|B1AKQ8_HUMAN Guanine nucleotide-binding protein G(I)/G(S)/G(T) subunit beta-1 (Fragment) OS=Homo sapiens GN=GNB1 PE=1 SV=7;tr|F6X3N5|F6X3N5_HUMAN Guanine nucleotide-binding protein G(I)/G(S)/G(T) subunit beta-1 (Fragment) OS=Homo sapiens GN=GNB1	12285	0	27936	2061900	1228100	1221200
B1AKY9;P50993	B1AKY9;P50993	Sodium/potassium-transporting ATPase subunit alpha-2	ATP1A2	tr|B1AKY9|B1AKY9_HUMAN Sodium/potassium-transporting ATPase subunit alpha OS=Homo sapiens GN=ATP1A2 PE=1 SV=1;sp|P50993|AT1A2_HUMAN Sodium/potassium-transporting ATPase subunit alpha-2 OS=Homo sapiens GN=ATP1A2 PE=1 SV=1	110.86	0	31992	0	220670	90267
B1ANM0;Q5T3P9;E9PN19;O00214	B1ANM0;Q5T3P9;E9PN19;O00214	Galectin;Galectin-8	LGALS8	tr|B1ANM0|B1ANM0_HUMAN Galectin (Fragment) OS=Homo sapiens GN=LGALS8 PE=1 SV=7;tr|Q5T3P9|Q5T3P9_HUMAN Galectin (Fragment) OS=Homo sapiens GN=LGALS8 PE=1 SV=1;tr|E9PN19|E9PN19_HUMAN Galectin OS=Homo sapiens GN=LGALS8 PE=1 SV=1;sp|O00214|LEG8_HUMAN Galectin-	18894	0	25509	0	0	94760
B1ANR1;B1ANR0;Q13310	B1ANR1;B1ANR0;Q13310	Polyadenylate-binding protein;Polyadenylate-binding protein 4	PABPC4	tr|B1ANR1|B1ANR1_HUMAN Polyadenylate-binding protein 4 (Fragment) OS=Homo sapiens GN=PABPC4 PE=1 SV=1;tr|B1ANR0|B1ANR0_HUMAN Polyadenylate-binding protein OS=Homo sapiens GN=PABPC4 PE=1 SV=1;sp|Q13310|PABP4_HUMAN Polyadenylate-binding protein 4 OS=Homo sap	14394	0.0024732	16692	0	0	68736
B1PS43;P35749	B1PS43;P35749	Myosin-11	MYH11	tr|B1PS43|B1PS43_HUMAN Myosin heavy chain 11 smooth muscle isoform OS=Homo sapiens GN=MYH11 PE=1 SV=1;sp|P35749|MYH11_HUMAN Myosin-11 OS=Homo sapiens GN=MYH11 PE=1 SV=3	234.23	0	38.55	182890	147790	551800
G3V5X6;G3V3K6;G3V251;B4DSU6;G3V555;G3V575;G3V576;G3V4W0;B4DY08;B2R5W2;G3V4C1;G3V2Q1;P07910;G3V2H6;G3V4M8;A0A0G2JPF8;A0A0G2JNQ3;P0DMR1;O60812;B7ZW38;B2RXH8	G3V5X6;G3V3K6;G3V251;B4DSU6;G3V555;G3V575;G3V576;G3V4W0;B4DY08;B2R5W2;G3V4C1;G3V2Q1;P07910;G3V2H6;G3V4M8;A0A0G2JPF8;A0A0G2JNQ3;P0DMR1;O60812;B7ZW38;B2RXH8	Heterogeneous nuclear ribonucleoproteins C1/C2;Heterogeneous nuclear ribonucleoprotein C-like 4;Heterogeneous nuclear ribonucleoprotein C-like 1;Heterogeneous nuclear ribonucleoprotein C-like 3;Heterogeneous nuclear ribonucleoprotein C-like 2	HNRNPC;HNRNPCL4;HNRNPCL1;HNRNPCL3;HNRNPCL2	tr|G3V5X6|G3V5X6_HUMAN Heterogeneous nuclear ribonucleoproteins C1/C2 (Fragment) OS=Homo sapiens GN=HNRNPC PE=1 SV=1;tr|G3V3K6|G3V3K6_HUMAN Heterogeneous nuclear ribonucleoproteins C1/C2 (Fragment) OS=Homo sapiens GN=HNRNPC PE=1 SV=1;tr|G3V251|G3V251_HUMAN	12.78	0	15669	0	47286	114950
B3KVN2;E9PQP6;P49354;E9PPM9;H0YCW1	B3KVN2;E9PQP6;P49354;E9PPM9;H0YCW1	Protein farnesyltransferase/geranylgeranyltransferase type-1 subunit alpha	FNTA	tr|B3KVN2|B3KVN2_HUMAN Farnesyltransferase, CAAX box, alpha, isoform CRA_c OS=Homo sapiens GN=FNTA PE=1 SV=1;tr|E9PQP6|E9PQP6_HUMAN Protein farnesyltransferase/geranylgeranyltransferase type-1 subunit alpha (Fragment) OS=Homo sapiens GN=FNTA PE=1 SV=1;sp|P	27443	0	16145	0	89289	122120
K7EMV3;B4DEB1;K7EK07;K7ES00;Q71DI3;Q16695;P84243;P68431;K7EP01;Q5TEC6;Q6NXT2	K7EMV3;B4DEB1;K7EK07;K7ES00;Q71DI3;Q16695;P84243;P68431;K7EP01;Q5TEC6;Q6NXT2	Histone H3;Histone H3.2;Histone H3.1t;Histone H3.3;Histone H3.1;Histone H3.3C	H3F3B;H3F3A;HIST2H3A;HIST3H3;HIST1H3A;HIST2H3PS2;H3F3C	tr|K7EMV3|K7EMV3_HUMAN Histone H3 OS=Homo sapiens GN=H3F3B PE=1 SV=1;tr|B4DEB1|B4DEB1_HUMAN Histone H3 OS=Homo sapiens GN=H3F3A PE=1 SV=1;tr|K7EK07|K7EK07_HUMAN Histone H3 (Fragment) OS=Homo sapiens GN=H3F3B PE=1 SV=1;tr|K7ES00|K7ES00_HUMAN Histone H3.3 (F	10334	0	47223	12883000	2080600	5031200
B4DEY6;Q9NZU5;C9IYS1;H7C3D2	B4DEY6;Q9NZU5;C9IYS1;H7C3D2	LIM and cysteine-rich domains protein 1	LMCD1	tr|B4DEY6|B4DEY6_HUMAN LIM and cysteine-rich domains protein 1 OS=Homo sapiens GN=LMCD1 PE=1 SV=1;sp|Q9NZU5|LMCD1_HUMAN LIM and cysteine-rich domains protein 1 OS=Homo sapiens GN=LMCD1 PE=1 SV=1;tr|C9IYS1|C9IYS1_HUMAN LIM and cysteine-rich domains protein	28513	0.0025147	18423	0	90662	0
E9PNZ9;B4DF77;Q6VY07	E9PNZ9;B4DF77;Q6VY07	Phosphofurin acidic cluster sorting protein 1	PACS1	tr|E9PNZ9|E9PNZ9_HUMAN Phosphofurin acidic cluster sorting protein 1 (Fragment) OS=Homo sapiens GN=PACS1 PE=1 SV=1;tr|B4DF77|B4DF77_HUMAN Phosphofurin acidic cluster sorting protein 1 OS=Homo sapiens GN=PACS1 PE=1 SV=1;sp|Q6VY07|PACS1_HUMAN Phosphofurin ac	88171	0	45829	0	0	73519
B4DGU4;P35222	B4DGU4;P35222	Catenin beta-1	CTNNB1	tr|B4DGU4|B4DGU4_HUMAN Catenin beta-1 OS=Homo sapiens GN=CTNNB1 PE=1 SV=1;sp|P35222|CTNB1_HUMAN Catenin beta-1 OS=Homo sapiens GN=CTNNB1 PE=1 SV=1	84765	0	126.88	1334800	1744600	2076500
B4DIH5;P61201;H0YKU5;H0YMC2;H0YM03	B4DIH5;P61201	COP9 signalosome complex subunit 2	COPS2	tr|B4DIH5|B4DIH5_HUMAN COP9 signalosome complex subunit 2 OS=Homo sapiens GN=COPS2 PE=1 SV=1;sp|P61201|CSN2_HUMAN COP9 signalosome complex subunit 2 OS=Homo sapiens GN=COPS2 PE=1 SV=1	44228	0	36746	182580	317160	926420
B4DJ81;P28331	B4DJ81;P28331	NADH-ubiquinone oxidoreductase 75 kDa subunit, mitochondrial	NDUFS1	tr|B4DJ81|B4DJ81_HUMAN NADH-ubiquinone oxidoreductase 75 kDa subunit, mitochondrial OS=Homo sapiens GN=NDUFS1 PE=1 SV=1;sp|P28331|NDUS1_HUMAN NADH-ubiquinone oxidoreductase 75 kDa subunit, mitochondrial OS=Homo sapiens GN=NDUFS1 PE=1 SV=3	66921	0	147.08	709390	1659900	1465400
B4DJV2;O75390;A0A0C4DGI3;F8VPA1;F8VR34;F8VTT8;F8W4S1;F8VRI6;F8VU34;H0YH82;F8W642;F8W0J2;F8VZK9;F8VP03;F8VX07;F8VRP1;F8VX68;F8VWQ5;F8VPF9;F8W1S4;F8W031	B4DJV2;O75390;A0A0C4DGI3	Citrate synthase;Citrate synthase, mitochondrial	CS	tr|B4DJV2|B4DJV2_HUMAN Citrate synthase OS=Homo sapiens GN=CS PE=1 SV=1;sp|O75390|CISY_HUMAN Citrate synthase, mitochondrial OS=Homo sapiens GN=CS PE=1 SV=2;tr|A0A0C4DGI3|A0A0C4DGI3_HUMAN Citrate synthase OS=Homo sapiens GN=CS PE=1 SV=1	50431	0	105.63	10912000	16219000	6801000
B4DL54;P49356	B4DL54;P49356	Protein farnesyltransferase subunit beta	CHURC1-FNTB;FNTB	tr|B4DL54|B4DL54_HUMAN Protein CHURC1-FNTB OS=Homo sapiens GN=CHURC1-FNTB PE=2 SV=1;sp|P49356|FNTB_HUMAN Protein farnesyltransferase subunit beta OS=Homo sapiens GN=FNTB PE=1 SV=1	52785	0	63637	0	113640	155660
Q5JV98;H0Y630;B4DR80;Q9Y6E0;C9JDH9;C9J6L2;C9JCC0;C9J232;H7C279;Q8NBY1;B4E0Y9;Q9P289;O00506	Q5JV98;H0Y630;B4DR80;Q9Y6E0;C9JDH9;C9J6L2;C9JCC0;C9J232;H7C279;Q8NBY1;B4E0Y9;Q9P289;O00506	Serine/threonine-protein kinase 24;Serine/threonine-protein kinase 24 36 kDa subunit;Serine/threonine-protein kinase 24 12 kDa subunit;Serine/threonine-protein kinase 26;Serine/threonine-protein kinase 25	STK24;STK25;STK26	tr|Q5JV98|Q5JV98_HUMAN Serine/threonine-protein kinase 24 (Fragment) OS=Homo sapiens GN=STK24 PE=1 SV=1;tr|H0Y630|H0Y630_HUMAN Serine/threonine-protein kinase 24 (Fragment) OS=Homo sapiens GN=STK24 PE=1 SV=1;tr|B4DR80|B4DR80_HUMAN Serine/threonine-protein	23127	0	36077	0	27357	25563
B4DT28;O43390	B4DT28;O43390	Heterogeneous nuclear ribonucleoprotein R	HNRNPR	tr|B4DT28|B4DT28_HUMAN Heterogeneous nuclear ribonucleoprotein R OS=Homo sapiens GN=HNRNPR PE=1 SV=1;sp|O43390|HNRPR_HUMAN Heterogeneous nuclear ribonucleoprotein R OS=Homo sapiens GN=HNRNPR PE=1 SV=1	55717	0	47869	0	123670	191750
B4DUC8;Q13126;J3QSB7;F8WES2;F2Z2F3	B4DUC8;Q13126;J3QSB7	S-methyl-5-thioadenosine phosphorylase;Purine nucleoside phosphorylase	MTAP	tr|B4DUC8|B4DUC8_HUMAN S-methyl-5-thioadenosine phosphorylase OS=Homo sapiens GN=MTAP PE=1 SV=1;sp|Q13126|MTAP_HUMAN S-methyl-5-thioadenosine phosphorylase OS=Homo sapiens GN=MTAP PE=1 SV=2;tr|J3QSB7|J3QSB7_HUMAN Purine nucleoside phosphorylase OS=Homo s	33186	0	56272	0	85375	110940
J3QS39;J3QTR3;F5H6Q2;F5GYU3;F5H2Z3;F5H265;B4DV12;F5H388;F5H747;F5GXK7;J3QKN0;Q5PY61;Q96C32;P62987;P62979;P0CG47;P0CG48;M0R1V7;M0R1M6;M0R2S1;J3QSA3;F5GZ39	J3QS39;J3QTR3;F5H6Q2;F5GYU3;F5H2Z3;F5H265;B4DV12;F5H388;F5H747;F5GXK7;J3QKN0;Q5PY61;Q96C32;P62987;P62979;P0CG47;P0CG48;M0R1V7;M0R1M6;M0R2S1;J3QSA3;F5GZ39	Ubiquitin-60S ribosomal protein L40;Ubiquitin;60S ribosomal protein L40;Ubiquitin-40S ribosomal protein S27a;Ubiquitin;40S ribosomal protein S27a;Polyubiquitin-B;Ubiquitin;Polyubiquitin-C;Ubiquitin	UBB;RPS27A;UBC;UBA52	tr|J3QS39|J3QS39_HUMAN Polyubiquitin-B (Fragment) OS=Homo sapiens GN=UBB PE=1 SV=1;tr|J3QTR3|J3QTR3_HUMAN Ubiquitin-40S ribosomal protein S27a (Fragment) OS=Homo sapiens GN=RPS27A PE=1 SV=1;tr|F5H6Q2|F5H6Q2_HUMAN Polyubiquitin-C (Fragment) OS=Homo sapiens	10469	0	64005	3873800	1493100	3520800
B4DXW1;P61158;F8WDR7;Q9P1U1;A0A0A0MTI9;H7C4J1;C9IZN3;Q9C0K3	B4DXW1;P61158	Actin-related protein 3	ACTR3	tr|B4DXW1|B4DXW1_HUMAN Actin-related protein 3 OS=Homo sapiens GN=ACTR3 PE=1 SV=1;sp|P61158|ARP3_HUMAN Actin-related protein 3 OS=Homo sapiens GN=ACTR3 PE=1 SV=3	42003	0	34.43	1053700	1319700	1911200
B4DY09;Q12905;X6R6Z1	B4DY09;Q12905	Interleukin enhancer-binding factor 2	ILF2	tr|B4DY09|B4DY09_HUMAN Interleukin enhancer-binding factor 2 OS=Homo sapiens GN=ILF2 PE=1 SV=1;sp|Q12905|ILF2_HUMAN Interleukin enhancer-binding factor 2 OS=Homo sapiens GN=ILF2 PE=1 SV=2	38.91	0	44492	475130	800450	2235500
B4DYT9;Q86TD4	B4DYT9;Q86TD4	Sarcalumenin	SRL	tr|B4DYT9|B4DYT9_HUMAN Sarcalumenin OS=Homo sapiens GN=SRL PE=1 SV=1;sp|Q86TD4|SRCA_HUMAN Sarcalumenin OS=Homo sapiens GN=SRL PE=2 SV=2	49807	0	39588	1137000	629990	224120
B4E0K5;Q16539;E7EX54;B5TY33;H7C4E2	B4E0K5;Q16539;E7EX54;B5TY33	Mitogen-activated protein kinase 14	MAPK14	tr|B4E0K5|B4E0K5_HUMAN Mitogen-activated protein kinase OS=Homo sapiens GN=MAPK14 PE=1 SV=1;sp|Q16539|MK14_HUMAN Mitogen-activated protein kinase 14 OS=Homo sapiens GN=MAPK14 PE=1 SV=3;tr|E7EX54|E7EX54_HUMAN Mitogen-activated protein kinase 14 (Fragment) O	32357	0	16383	0	307810	697260
B4E3S0;Q9ULV4	B4E3S0;Q9ULV4	Coronin;Coronin-1C	CORO1C	tr|B4E3S0|B4E3S0_HUMAN Coronin OS=Homo sapiens GN=CORO1C PE=1 SV=1;sp|Q9ULV4|COR1C_HUMAN Coronin-1C OS=Homo sapiens GN=CORO1C PE=1 SV=1	41603	0	33532	0	0	68423
B5MBZ8;C9JD73;C9J177;H7C003;Q15435	B5MBZ8;C9JD73;C9J177;H7C003;Q15435	Protein phosphatase 1 regulatory subunit 7	PPP1R7	tr|B5MBZ8|B5MBZ8_HUMAN Protein phosphatase 1 regulatory subunit 7 OS=Homo sapiens GN=PPP1R7 PE=1 SV=1;tr|C9JD73|C9JD73_HUMAN Protein phosphatase 1 regulatory subunit 7 (Fragment) OS=Homo sapiens GN=PPP1R7 PE=1 SV=1;tr|C9J177|C9J177_HUMAN Protein phosphatas	31357	0	34956	0	166220	134060
B5MC20;P0C870;H0Y9G9	B5MC20;P0C870;H0Y9G9	JmjC domain-containing protein 7	JMJD7;JMJD7-PLA2G4B	tr|B5MC20|B5MC20_HUMAN JmjC domain-containing protein 7 OS=Homo sapiens GN=JMJD7 PE=1 SV=1;sp|P0C870|JMJD7_HUMAN JmjC domain-containing protein 7 OS=Homo sapiens GN=JMJD7 PE=1 SV=1;tr|H0Y9G9|H0Y9G9_HUMAN Protein JMJD7-PLA2G4B (Fragment) OS=Homo sapiens GN=	24796	0	15317	0	41941	72292
B5MC59;P35244	B5MC59;P35244	Replication protein A 14 kDa subunit	RPA3	tr|B5MC59|B5MC59_HUMAN Replication protein A 14 kDa subunit OS=Homo sapiens GN=RPA3 PE=1 SV=1;sp|P35244|RFA3_HUMAN Replication protein A 14 kDa subunit OS=Homo sapiens GN=RPA3 PE=1 SV=1	91703	0.0086275	13989	0	0	47768
B5MCP9;P62081	B5MCP9;P62081	40S ribosomal protein S7	RPS7	tr|B5MCP9|B5MCP9_HUMAN 40S ribosomal protein S7 OS=Homo sapiens GN=RPS7 PE=1 SV=1;sp|P62081|RS7_HUMAN 40S ribosomal protein S7 OS=Homo sapiens GN=RPS7 PE=1 SV=1	21312	0	52103	0	116690	371470
B5MCX3;Q15019;C9J2Q4;C9IY94;C9J938;H7C310;C9JB25;H7C2Y0;C9IZU3;C9JQJ4;C9JFT1;F8WB65;B5MD47;C9JZI2	B5MCX3;Q15019;C9J2Q4;C9IY94;C9J938;H7C310;C9JB25;H7C2Y0	Septin-2	SEPT2	tr|B5MCX3|B5MCX3_HUMAN Septin-2 OS=Homo sapiens GN=SEPT2 PE=1 SV=1;sp|Q15019|SEPT2_HUMAN Septin-2 OS=Homo sapiens GN=SEPT2 PE=1 SV=1;tr|C9J2Q4|C9J2Q4_HUMAN Septin-2 (Fragment) OS=Homo sapiens GN=SEPT2 PE=1 SV=1;tr|C9IY94|C9IY94_HUMAN Septin-2 (Fragment) OS	36.94	0	30061	360350	350620	248800
B5MDF5;J3KQE5;P62826;F5H018;H0YFC6;B4DV51	B5MDF5;J3KQE5;P62826;F5H018;H0YFC6	GTP-binding nuclear protein Ran	RAN	tr|B5MDF5|B5MDF5_HUMAN GTP-binding nuclear protein Ran OS=Homo sapiens GN=RAN PE=1 SV=1;tr|J3KQE5|J3KQE5_HUMAN GTP-binding nuclear protein Ran (Fragment) OS=Homo sapiens GN=RAN PE=1 SV=1;sp|P62826|RAN_HUMAN GTP-binding nuclear protein Ran OS=Homo sapiens G	26224	0	28.82	1555900	2547800	1912900
Q99613;B5ME19	Q99613;B5ME19	Eukaryotic translation initiation factor 3 subunit C;Eukaryotic translation initiation factor 3 subunit C-like protein	EIF3C;EIF3CL	sp|Q99613|EIF3C_HUMAN Eukaryotic translation initiation factor 3 subunit C OS=Homo sapiens GN=EIF3C PE=1 SV=1;sp|B5ME19|EIFCL_HUMAN Eukaryotic translation initiation factor 3 subunit C-like protein OS=Homo sapiens GN=EIF3CL PE=3 SV=1	105.34	0	10306	346430	456610	530880
E7EW69;E7EX04;B5ME97;Q9P0V9	E7EW69;E7EX04;B5ME97;Q9P0V9	Septin-10	SEPT10	tr|E7EW69|E7EW69_HUMAN Septin-10 OS=Homo sapiens GN=SEPT10 PE=1 SV=1;tr|E7EX04|E7EX04_HUMAN Septin-10 OS=Homo sapiens GN=SEPT10 PE=1 SV=1;tr|B5ME97|B5ME97_HUMAN Septin 10, isoform CRA_c OS=Homo sapiens GN=SEPT10 PE=1 SV=2;sp|Q9P0V9|SEP10_HUMAN Septin-10 OS	52145	0	25667	0	23630	0
B7Z645;O60506;F6UXX1	B7Z645;O60506;F6UXX1	Heterogeneous nuclear ribonucleoprotein Q	SYNCRIP	tr|B7Z645|B7Z645_HUMAN Heterogeneous nuclear ribonucleoprotein Q OS=Homo sapiens GN=SYNCRIP PE=1 SV=1;sp|O60506|HNRPQ_HUMAN Heterogeneous nuclear ribonucleoprotein Q OS=Homo sapiens GN=SYNCRIP PE=1 SV=2;tr|F6UXX1|F6UXX1_HUMAN Heterogeneous nuclear ribonucl	52046	0	26654	0	0	38057
B7Z6P0;H3BQR2;Q9Y5Y2	B7Z6P0;H3BQR2;Q9Y5Y2	Cytosolic Fe-S cluster assembly factor NUBP2	NUBP2	tr|B7Z6P0|B7Z6P0_HUMAN Cytosolic Fe-S cluster assembly factor NUBP2 OS=Homo sapiens GN=NUBP2 PE=1 SV=1;tr|H3BQR2|H3BQR2_HUMAN Cytosolic Fe-S cluster assembly factor NUBP2 OS=Homo sapiens GN=NUBP2 PE=1 SV=1;sp|Q9Y5Y2|NUBP2_HUMAN Cytosolic Fe-S cluster assem	13793	0.0024671	16349	0	0	18768
F8W1R7;J3KND3;G8JLA2;G3V1V0;B7Z6Z4;P60660;G3V1Y7;F8VPF3;F8VXL3;H0YI43;F8VZU9;F8W1I5;F8W180;P14649	F8W1R7;J3KND3;G8JLA2;G3V1V0;B7Z6Z4;P60660;G3V1Y7;F8VPF3	Myosin light polypeptide 6	MYL6	tr|F8W1R7|F8W1R7_HUMAN Myosin light polypeptide 6 OS=Homo sapiens GN=MYL6 PE=1 SV=1;tr|J3KND3|J3KND3_HUMAN Myosin light polypeptide 6 OS=Homo sapiens GN=MYL6 PE=1 SV=1;tr|G8JLA2|G8JLA2_HUMAN Myosin light polypeptide 6 OS=Homo sapiens GN=MYL6 PE=1 SV=1;tr|G	16.29	0	43915	278750	73250	90025
B7Z7P8;P62495;I3L492;D6RCB3;D6RJE8	B7Z7P8;P62495;I3L492	Eukaryotic peptide chain release factor subunit 1	ETF1	tr|B7Z7P8|B7Z7P8_HUMAN Eukaryotic peptide chain release factor subunit 1 OS=Homo sapiens GN=ETF1 PE=1 SV=1;sp|P62495|ERF1_HUMAN Eukaryotic peptide chain release factor subunit 1 OS=Homo sapiens GN=ETF1 PE=1 SV=3;tr|I3L492|I3L492_HUMAN Eukaryotic peptide ch	47475	0	24.79	125880	324050	199960
H0YHC3;F8W020;F8W118;F8VXI6;F8VUX1;F8VY35;F8VV59;B7Z9C2;F8W0J6;F5H4R6;H0YIV4;P55209;F8VRJ2;H0YH88;F8W543;F8VVB5	H0YHC3;F8W020;F8W118;F8VXI6;F8VUX1;F8VY35;F8VV59;B7Z9C2;F8W0J6;F5H4R6;H0YIV4;P55209;F8VRJ2;H0YH88;F8W543	Nucleosome assembly protein 1-like 1	NAP1L1	tr|H0YHC3|H0YHC3_HUMAN Nucleosome assembly protein 1-like 1 (Fragment) OS=Homo sapiens GN=NAP1L1 PE=1 SV=1;tr|F8W020|F8W020_HUMAN Nucleosome assembly protein 1-like 1 (Fragment) OS=Homo sapiens GN=NAP1L1 PE=1 SV=1;tr|F8W118|F8W118_HUMAN Nucleosome assembly	23417	0	32727	0	76230	14491
B7Z9I1;Q5T4U5;P11310;H0YDT5;E9PJM9;E9PRX4	B7Z9I1;Q5T4U5;P11310	Medium-chain specific acyl-CoA dehydrogenase, mitochondrial	ACADM	tr|B7Z9I1|B7Z9I1_HUMAN Medium-chain-specific acyl-CoA dehydrogenase, mitochondrial OS=Homo sapiens GN=ACADM PE=1 SV=1;tr|Q5T4U5|Q5T4U5_HUMAN Acyl-Coenzyme A dehydrogenase, C-4 to C-12 straight chain, isoform CRA_a OS=Homo sapiens GN=ACADM PE=1 SV=1;sp|P113	42426	0	126.08	1380600	2943300	939500
H3BPQ3;B7Z9X4;Q9ULP0;H3BQJ4;H3BSC3;H3BU25;H3BNE7	H3BPQ3;B7Z9X4;Q9ULP0;H3BQJ4	Protein NDRG4	NDRG4	tr|H3BPQ3|H3BPQ3_HUMAN Protein NDRG4 (Fragment) OS=Homo sapiens GN=NDRG4 PE=1 SV=1;tr|B7Z9X4|B7Z9X4_HUMAN Protein NDRG4 OS=Homo sapiens GN=NDRG4 PE=1 SV=1;sp|Q9ULP0|NDRG4_HUMAN Protein NDRG4 OS=Homo sapiens GN=NDRG4 PE=1 SV=2;tr|H3BQJ4|H3BQJ4_HUMAN Protein	16764	0	88215	0	350060	407740
H7C0L5;B7ZKJ8;Q14624	H7C0L5;B7ZKJ8;Q14624	Inter-alpha-trypsin inhibitor heavy chain H4;70 kDa inter-alpha-trypsin inhibitor heavy chain H4;35 kDa inter-alpha-trypsin inhibitor heavy chain H4	ITIH4	tr|H7C0L5|H7C0L5_HUMAN Inter-alpha-trypsin inhibitor heavy chain H4 (Fragment) OS=Homo sapiens GN=ITIH4 PE=1 SV=1;tr|B7ZKJ8|B7ZKJ8_HUMAN ITIH4 protein OS=Homo sapiens GN=ITIH4 PE=1 SV=1;sp|Q14624|ITIH4_HUMAN Inter-alpha-trypsin inhibitor heavy chain H4 OS=	79952	0.0079239	14473	0	19847	0
C9JR62;B8ZZB3;E7ERF0;Q6ZP82	C9JR62;B8ZZB3;E7ERF0;Q6ZP82	Coiled-coil domain-containing protein 141	CCDC141	tr|C9JR62|C9JR62_HUMAN Coiled-coil domain-containing protein 141 (Fragment) OS=Homo sapiens GN=CCDC141 PE=1 SV=1;tr|B8ZZB3|B8ZZB3_HUMAN Coiled-coil domain-containing protein 141 OS=Homo sapiens GN=CCDC141 PE=1 SV=1;tr|E7ERF0|E7ERF0_HUMAN Coiled-coil domain	71964	0	23705	0	48648	167120
C9J128;C9J2Z6;C9J173;B8ZZF6;E7ET59;E7EUX4;E7ENF2;P49441	C9J128;C9J2Z6;C9J173;B8ZZF6;E7ET59;E7EUX4;E7ENF2;P49441	Inositol polyphosphate 1-phosphatase	INPP1	tr|C9J128|C9J128_HUMAN Inositol polyphosphate 1-phosphatase (Fragment) OS=Homo sapiens GN=INPP1 PE=1 SV=1;tr|C9J2Z6|C9J2Z6_HUMAN Inositol polyphosphate 1-phosphatase (Fragment) OS=Homo sapiens GN=INPP1 PE=1 SV=1;tr|C9J173|C9J173_HUMAN Inositol polyphosphat	78381	0	84015	0	0	22769
B8ZZP4;C9J7U9;C9K052;Q12765	B8ZZP4;C9J7U9;C9K052;Q12765	Secernin-1	SCRN1	tr|B8ZZP4|B8ZZP4_HUMAN Secernin-1 OS=Homo sapiens GN=SCRN1 PE=1 SV=1;tr|C9J7U9|C9J7U9_HUMAN Secernin-1 (Fragment) OS=Homo sapiens GN=SCRN1 PE=1 SV=1;tr|C9K052|C9K052_HUMAN Secernin-1 (Fragment) OS=Homo sapiens GN=SCRN1 PE=1 SV=1;sp|Q12765|SCRN1_HUMAN Secer	15642	0.0040816	15904	0	0	16636
H7C400;B8ZZZ0;Q6NVY1	H7C400;B8ZZZ0;Q6NVY1	3-hydroxyisobutyryl-CoA hydrolase, mitochondrial	HIBCH	tr|H7C400|H7C400_HUMAN 3-hydroxyisobutyryl-CoA hydrolase, mitochondrial (Fragment) OS=Homo sapiens GN=HIBCH PE=1 SV=1;tr|B8ZZZ0|B8ZZZ0_HUMAN 3-hydroxyisobutyryl-CoA hydrolase, mitochondrial (Fragment) OS=Homo sapiens GN=HIBCH PE=1 SV=1;sp|Q6NVY1|HIBCH_HUMA	57074	0	31487	0	0	12285
H7BZF2;H7C0M1;C9IYT0;O60832	H7BZF2;H7C0M1;C9IYT0;O60832	H/ACA ribonucleoprotein complex subunit 4	DKC1	tr|H7BZF2|H7BZF2_HUMAN H/ACA ribonucleoprotein complex subunit 4 (Fragment) OS=Homo sapiens GN=DKC1 PE=1 SV=1;tr|H7C0M1|H7C0M1_HUMAN H/ACA ribonucleoprotein complex subunit 4 (Fragment) OS=Homo sapiens GN=DKC1 PE=1 SV=1;tr|C9IYT0|C9IYT0_HUMAN H/ACA ribonuc	85829	0.009397	13892	0	0	29609
C9J0K6;P30626	C9J0K6;P30626	Sorcin	SRI	tr|C9J0K6|C9J0K6_HUMAN Sorcin OS=Homo sapiens GN=SRI PE=1 SV=1;sp|P30626|SORCN_HUMAN Sorcin OS=Homo sapiens GN=SRI PE=1 SV=1	17605	0	45784	394250	0	152580
C9J2C0;Q9NY65;V9GZ17;A6NHL2;C9K0S6;Q9H853	C9J2C0;Q9NY65	Tubulin alpha-8 chain	TUBA8	tr|C9J2C0|C9J2C0_HUMAN Tubulin alpha-8 chain (Fragment) OS=Homo sapiens GN=TUBA8 PE=1 SV=1;sp|Q9NY65|TBA8_HUMAN Tubulin alpha-8 chain OS=Homo sapiens GN=TUBA8 PE=1 SV=1	51984	0	11965	0	587820	1199100
C9J5A3;D3YTC6;Q68DG0;Q8N241;Q9UBY9	C9J5A3;D3YTC6;Q68DG0;Q8N241;Q9UBY9	Heat shock protein beta-7	HSPB7;DKFZp779D0968	tr|C9J5A3|C9J5A3_HUMAN Heat shock protein beta-7 (Fragment) OS=Homo sapiens GN=HSPB7 PE=1 SV=1;tr|D3YTC6|D3YTC6_HUMAN Heat shock protein beta-7 OS=Homo sapiens GN=HSPB7 PE=1 SV=1;tr|Q68DG0|Q68DG0_HUMAN Heat shock protein beta-7 OS=Homo sapiens GN=DKFZp779D	13675	0	54495	0	106100	0
C9JDT9;C9J695;Q6ICL3;A0A0A0MSI5;C9JKN2;B7Z4A5;B7Z6W2;F8WDT9;A8MWT1	C9JDT9;C9J695;Q6ICL3;A0A0A0MSI5;C9JKN2;B7Z4A5;B7Z6W2;F8WDT9;A8MWT1	Transport and Golgi organization protein 2 homolog	TANGO2;C22orf25	tr|C9JDT9|C9JDT9_HUMAN Transport and Golgi organization protein 2 homolog OS=Homo sapiens GN=TANGO2 PE=1 SV=1;tr|C9J695|C9J695_HUMAN Transport and Golgi organization protein 2 homolog (Fragment) OS=Homo sapiens GN=TANGO2 PE=1 SV=1;sp|Q6ICL3|TNG2_HUMAN Tran	18472	0	32026	0	271890	230170
C9J8H1;P36543	C9J8H1;P36543	V-type proton ATPase subunit E 1	ATP6V1E1	tr|C9J8H1|C9J8H1_HUMAN V-type proton ATPase subunit E 1 (Fragment) OS=Homo sapiens GN=ATP6V1E1 PE=1 SV=1;sp|P36543|VATE1_HUMAN V-type proton ATPase subunit E 1 OS=Homo sapiens GN=ATP6V1E1 PE=1 SV=1	23539	0	12692	0	117520	123890
C9J8Q5;P51649	C9J8Q5;P51649	Succinate-semialdehyde dehydrogenase, mitochondrial	ALDH5A1	tr|C9J8Q5|C9J8Q5_HUMAN Succinate-semialdehyde dehydrogenase, mitochondrial OS=Homo sapiens GN=ALDH5A1 PE=1 SV=1;sp|P51649|SSDH_HUMAN Succinate-semialdehyde dehydrogenase, mitochondrial OS=Homo sapiens GN=ALDH5A1 PE=1 SV=2	53867	0	75713	0	0	60700
C9JEU5;C9JC84;P02679;C9JPQ9;C9JU00	C9JEU5;C9JC84;P02679	Fibrinogen gamma chain	FGG	tr|C9JEU5|C9JEU5_HUMAN Fibrinogen gamma chain OS=Homo sapiens GN=FGG PE=1 SV=1;tr|C9JC84|C9JC84_HUMAN Fibrinogen gamma chain OS=Homo sapiens GN=FGG PE=1 SV=1;sp|P02679|FIBG_HUMAN Fibrinogen gamma chain OS=Homo sapiens GN=FGG PE=1 SV=3	50322	0	94421	453490	4942300	339320
C9JEV6;Q9UJ70;H7C3G9;H7C286;E9PPU6;H0YF44;H0YEB7;H0YE82;H0YC94;H7C1L7	C9JEV6;Q9UJ70;H7C3G9;H7C286	N-acetyl-D-glucosamine kinase	NAGK	tr|C9JEV6|C9JEV6_HUMAN N-acetyl-D-glucosamine kinase OS=Homo sapiens GN=NAGK PE=1 SV=3;sp|Q9UJ70|NAGK_HUMAN N-acetyl-D-glucosamine kinase OS=Homo sapiens GN=NAGK PE=1 SV=4;tr|H7C3G9|H7C3G9_HUMAN N-acetyl-D-glucosamine kinase OS=Homo sapiens GN=NAGK PE=1 SV	32017	0	71673	158540	1514400	1941100
C9JFR7;P99999;CON__P62894	C9JFR7;P99999	Cytochrome c	CYCS	tr|C9JFR7|C9JFR7_HUMAN Cytochrome c (Fragment) OS=Homo sapiens GN=CYCS PE=1 SV=1;sp|P99999|CYC_HUMAN Cytochrome c OS=Homo sapiens GN=CYCS PE=1 SV=2	11333	0	55419	746770	166330	633290
C9JGI3;P19971	C9JGI3;P19971	Thymidine phosphorylase	TYMP	tr|C9JGI3|C9JGI3_HUMAN Thymidine phosphorylase (Fragment) OS=Homo sapiens GN=TYMP PE=1 SV=1;sp|P19971|TYPH_HUMAN Thymidine phosphorylase OS=Homo sapiens GN=TYMP PE=1 SV=2	46087	0	33482	475850	506280	630340
C9JGM0;Q96GK7	C9JGM0;Q96GK7	Fumarylacetoacetate hydrolase domain-containing protein 2A	FAHD2A	tr|C9JGM0|C9JGM0_HUMAN Fumarylacetoacetate hydrolase domain-containing protein 2A (Fragment) OS=Homo sapiens GN=FAHD2A PE=1 SV=1;sp|Q96GK7|FAH2A_HUMAN Fumarylacetoacetate hydrolase domain-containing protein 2A OS=Homo sapiens GN=FAHD2A PE=1 SV=1	14021	0.0086478	14006	0	0	37694
C9JIF9;P13798;H7C1U0;H0YFE5;C9JLK2;H7C393	C9JIF9;P13798;H7C1U0	Acylamino-acid-releasing enzyme	APEH	tr|C9JIF9|C9JIF9_HUMAN Acylamino-acid-releasing enzyme OS=Homo sapiens GN=APEH PE=1 SV=1;sp|P13798|ACPH_HUMAN Acylamino-acid-releasing enzyme OS=Homo sapiens GN=APEH PE=1 SV=4;tr|H7C1U0|H7C1U0_HUMAN Acylamino-acid-releasing enzyme (Fragment) OS=Homo sapien	81673	0	14657	87944	366660	471720
C9JIG9;O95747	C9JIG9;O95747	Serine/threonine-protein kinase OSR1	OXSR1	tr|C9JIG9|C9JIG9_HUMAN Serine/threonine-protein kinase OSR1 OS=Homo sapiens GN=OXSR1 PE=1 SV=1;sp|O95747|OXSR1_HUMAN Serine/threonine-protein kinase OSR1 OS=Homo sapiens GN=OXSR1 PE=1 SV=1	51856	0	47124	0	59207	105960
C9JIK8;Q9Y4P1;H0Y2Y0;F2Z2K8;H7C2A6;C9JQ72	C9JIK8;Q9Y4P1;H0Y2Y0;F2Z2K8;H7C2A6;C9JQ72	Cysteine protease ATG4B	ATG4B	tr|C9JIK8|C9JIK8_HUMAN Cysteine protease ATG4B (Fragment) OS=Homo sapiens GN=ATG4B PE=1 SV=1;sp|Q9Y4P1|ATG4B_HUMAN Cysteine protease ATG4B OS=Homo sapiens GN=ATG4B PE=1 SV=2;tr|H0Y2Y0|H0Y2Y0_HUMAN Cysteine protease ATG4B (Fragment) OS=Homo sapiens GN=ATG4B	24833	0	16898	0	76203	57306
C9JZN1;C9JIS1;C9JXA5;P62879;C9JD14	C9JZN1;C9JIS1;C9JXA5;P62879;C9JD14	Guanine nucleotide-binding protein G(I)/G(S)/G(T) subunit beta-2	GNB2;GNB4	tr|C9JZN1|C9JZN1_HUMAN Guanine nucleotide-binding protein G(I)/G(S)/G(T) subunit beta-2 (Fragment) OS=Homo sapiens GN=GNB2 PE=1 SV=1;tr|C9JIS1|C9JIS1_HUMAN Guanine nucleotide-binding protein G(I)/G(S)/G(T) subunit beta-2 (Fragment) OS=Homo sapiens GN=GNB2	17032	0	97659	0	0	302140
C9JJT2;C9JX40;H7C2G0;P55822	C9JJT2;C9JX40;H7C2G0;P55822	SH3 domain-binding glutamic acid-rich protein	SH3BGR	tr|C9JJT2|C9JJT2_HUMAN SH3 domain-binding glutamic acid-rich protein OS=Homo sapiens GN=SH3BGR PE=1 SV=1;tr|C9JX40|C9JX40_HUMAN SH3 domain-binding glutamic acid-rich protein (Fragment) OS=Homo sapiens GN=SH3BGR PE=1 SV=2;tr|H7C2G0|H7C2G0_HUMAN SH3 domain-b	10746	0.0024712	16529	0	0	14204
C9JJT5;C9JU26;G3V325;P56134	C9JJT5;C9JU26;G3V325;P56134	ATP synthase subunit f, mitochondrial	ATP5J2-PTCD1;ATP5J2	tr|C9JJT5|C9JJT5_HUMAN Protein ATP5J2-PTCD1 OS=Homo sapiens GN=ATP5J2-PTCD1 PE=4 SV=2;tr|C9JU26|C9JU26_HUMAN ATP synthase subunit f, mitochondrial OS=Homo sapiens GN=ATP5J2 PE=1 SV=1;tr|G3V325|G3V325_HUMAN Protein ATP5J2-PTCD1 OS=Homo sapiens GN=ATP5J2-PTC	59149	0	26319	0	0	29374
C9JMV9;Q03154;F8WC59;C9JYZ0	C9JMV9;Q03154;F8WC59;C9JYZ0	Aminoacylase-1	ABHD14A-ACY1;ACY1	tr|C9JMV9|C9JMV9_HUMAN Protein ABHD14A-ACY1 OS=Homo sapiens GN=ABHD14A-ACY1 PE=4 SV=1;sp|Q03154|ACY1_HUMAN Aminoacylase-1 OS=Homo sapiens GN=ACY1 PE=1 SV=1;tr|F8WC59|F8WC59_HUMAN Aminoacylase-1 OS=Homo sapiens GN=ACY1 PE=1 SV=1;tr|C9JYZ0|C9JYZ0_HUMAN Amino	56435	0.0025231	18584	0	22032	24725
C9JQ42;P46976;G5E9W8;C9J8R8;C9J7C7	C9JQ42;P46976;G5E9W8	Glycogenin-1	GYG1	tr|C9JQ42|C9JQ42_HUMAN Glycogenin-1 (Fragment) OS=Homo sapiens GN=GYG1 PE=1 SV=7;sp|P46976|GLYG_HUMAN Glycogenin-1 OS=Homo sapiens GN=GYG1 PE=1 SV=4;tr|G5E9W8|G5E9W8_HUMAN Glycogenin 1, isoform CRA_e OS=Homo sapiens GN=GYG1 PE=1 SV=1	29978	0	57186	3999900	8146200	7117000
F8WBI9;E9PEC3;E7EUY3;E7ETT1;E9PDR0;C9JQS9;E7EX59;P05166;C9JVW9;H7C5C9;E7ENC1;E7ETT4	F8WBI9;E9PEC3;E7EUY3;E7ETT1;E9PDR0;C9JQS9;E7EX59;P05166;C9JVW9;H7C5C9;E7ENC1;E7ETT4	Propionyl-CoA carboxylase beta chain, mitochondrial	PCCB	tr|F8WBI9|F8WBI9_HUMAN Propionyl-CoA carboxylase beta chain, mitochondrial OS=Homo sapiens GN=PCCB PE=1 SV=1;tr|E9PEC3|E9PEC3_HUMAN Propionyl-CoA carboxylase beta chain, mitochondrial OS=Homo sapiens GN=PCCB PE=1 SV=1;tr|E7EUY3|E7EUY3_HUMAN Propionyl-CoA c	43712	0	3666	0	64338	34340
F8WF90;C9JQU6;F8WF33;O75915	F8WF90;C9JQU6;F8WF33;O75915	PRA1 family protein 3	ARL6IP5	tr|F8WF90|F8WF90_HUMAN PRA1 family protein 3 OS=Homo sapiens GN=ARL6IP5 PE=1 SV=1;tr|C9JQU6|C9JQU6_HUMAN PRA1 family protein 3 OS=Homo sapiens GN=ARL6IP5 PE=1 SV=1;tr|F8WF33|F8WF33_HUMAN PRA1 family protein 3 OS=Homo sapiens GN=ARL6IP5 PE=1 SV=1;sp|O75915|	68708	0	25244	238090	98750	0
C9JS50;Q687X5	C9JS50;Q687X5	Metalloreductase STEAP4	STEAP4	tr|C9JS50|C9JS50_HUMAN Metalloreductase STEAP4 OS=Homo sapiens GN=STEAP4 PE=1 SV=1;sp|Q687X5|STEA4_HUMAN Metalloreductase STEAP4 OS=Homo sapiens GN=STEAP4 PE=1 SV=1	38579	0	14924	198180	156870	171340
H7BYW5;C9JSK5;P31321	H7BYW5;C9JSK5;P31321	cAMP-dependent protein kinase type I-beta regulatory subunit	PRKAR1B	tr|H7BYW5|H7BYW5_HUMAN cAMP-dependent protein kinase type I-beta regulatory subunit (Fragment) OS=Homo sapiens GN=PRKAR1B PE=1 SV=1;tr|C9JSK5|C9JSK5_HUMAN cAMP-dependent protein kinase type I-beta regulatory subunit (Fragment) OS=Homo sapiens GN=PRKAR1B PE	26937	0	25474	0	0	97033
C9JUK8;P61328;C9JIN3;C9JEN8;Q92915	C9JUK8;P61328;C9JIN3;C9JEN8;Q92915	Fibroblast growth factor;Fibroblast growth factor 12;Fibroblast growth factor 14	FGF12;FGF14	tr|C9JUK8|C9JUK8_HUMAN Fibroblast growth factor (Fragment) OS=Homo sapiens GN=FGF12 PE=1 SV=1;sp|P61328|FGF12_HUMAN Fibroblast growth factor 12 OS=Homo sapiens GN=FGF12 PE=1 SV=1;tr|C9JIN3|C9JIN3_HUMAN Fibroblast growth factor (Fragment) OS=Homo sapiens GN	16026	0	10.41	0	217260	328740
C9JZD1;O15145;F8VR50	C9JZD1;O15145;F8VR50	Actin-related protein 2/3 complex subunit 3	ARPC3	tr|C9JZD1|C9JZD1_HUMAN Actin-related protein 2/3 complex subunit 3 (Fragment) OS=Homo sapiens GN=ARPC3 PE=1 SV=1;sp|O15145|ARPC3_HUMAN Actin-related protein 2/3 complex subunit 3 OS=Homo sapiens GN=ARPC3 PE=1 SV=3;tr|F8VR50|F8VR50_HUMAN Actin-related prote	11546	0	19792	0	374260	351050
C9JZI7;Q99733;A8MXH2;C9J6D1;E9PNW0;E9PJJ2;E9PS34;E9PNJ7;E9PKT8;E9PKI2;C9J1B1;E9PP22;H0YCI4	C9JZI7;Q99733;A8MXH2;C9J6D1;E9PNW0;E9PJJ2;E9PS34;E9PNJ7;E9PKT8	Nucleosome assembly protein 1-like 4	NAP1L4	tr|C9JZI7|C9JZI7_HUMAN Nucleosome assembly protein 1-like 4 (Fragment) OS=Homo sapiens GN=NAP1L4 PE=1 SV=1;sp|Q99733|NP1L4_HUMAN Nucleosome assembly protein 1-like 4 OS=Homo sapiens GN=NAP1L4 PE=1 SV=1;tr|A8MXH2|A8MXH2_HUMAN Nucleosome assembly protein 1-l	31839	0	89295	391330	326240	133750
C9JZW7;P54922	C9JZW7;P54922	[Protein ADP-ribosylarginine] hydrolase	ADPRH	tr|C9JZW7|C9JZW7_HUMAN [Protein ADP-ribosylarginine] hydrolase (Fragment) OS=Homo sapiens GN=ADPRH PE=1 SV=1;sp|P54922|ADPRH_HUMAN [Protein ADP-ribosylarginine] hydrolase OS=Homo sapiens GN=ADPRH PE=1 SV=1	13789	0	36837	0	0	25952
D3DQ30;Q5SRH9;E9PHX9;E9PAZ4;A0A0A0MSW9;A0A0A0MRQ0	D3DQ30;Q5SRH9;E9PHX9;E9PAZ4;A0A0A0MSW9;A0A0A0MRQ0	Tetratricopeptide repeat protein 39A	TTC39A	tr|D3DQ30|D3DQ30_HUMAN HCG40295, isoform CRA_d OS=Homo sapiens GN=TTC39A PE=1 SV=1;sp|Q5SRH9|TT39A_HUMAN Tetratricopeptide repeat protein 39A OS=Homo sapiens GN=TTC39A PE=2 SV=1;tr|E9PHX9|E9PHX9_HUMAN Tetratricopeptide repeat protein 39A (Fragment) OS=Homo	63.18	0	45383	0	16835	18783
D3DQ64;P27144	D3DQ64;P27144	Adenylate kinase 4, mitochondrial	AK4	tr|D3DQ64|D3DQ64_HUMAN Adenylate kinase 4, mitochondrial OS=Homo sapiens GN=AK4 PE=1 SV=1;sp|P27144|KAD4_HUMAN Adenylate kinase 4, mitochondrial OS=Homo sapiens GN=AK4 PE=1 SV=1	19.78	0.002451	16047	0	0	12991
H0Y3P2;D3DQV9;P78344	H0Y3P2;D3DQV9;P78344	Eukaryotic translation initiation factor 4 gamma 2	EIF4G2	tr|H0Y3P2|H0Y3P2_HUMAN Eukaryotic translation initiation factor 4 gamma 2 OS=Homo sapiens GN=EIF4G2 PE=1 SV=1;tr|D3DQV9|D3DQV9_HUMAN Eukaryotic translation initiation factor 4 gamma 2 (Fragment) OS=Homo sapiens GN=EIF4G2 PE=1 SV=1;sp|P78344|IF4G2_HUMAN Euk	98117	0.0064154	1.5	0	0	17862
D3DSM0;P05107;J3KNI6;A0A087WX36	D3DSM0;P05107;J3KNI6;A0A087WX36	Integrin beta;Integrin beta-2	ITGB2	tr|D3DSM0|D3DSM0_HUMAN Integrin beta OS=Homo sapiens GN=ITGB2 PE=1 SV=1;sp|P05107|ITB2_HUMAN Integrin beta-2 OS=Homo sapiens GN=ITGB2 PE=1 SV=2;tr|J3KNI6|J3KNI6_HUMAN Integrin beta (Fragment) OS=Homo sapiens GN=ITGB2 PE=1 SV=1;tr|A0A087WX36|A0A087WX36_HUMA	78354	0.00090253	2456	129860	0	0
D4Q8H0;Q9NYL2;C9J3F7	D4Q8H0;Q9NYL2	Mitogen-activated protein kinase kinase kinase MLT	pk;ZAK	tr|D4Q8H0|D4Q8H0_HUMAN Mitogen-activated protein kinase kinase kinase MLT OS=Homo sapiens GN=pk PE=1 SV=1;sp|Q9NYL2|MLTK_HUMAN Mitogen-activated protein kinase kinase kinase MLT OS=Homo sapiens GN=ZAK PE=1 SV=3	51582	0	69484	211990	890000	1154300
D6R938;E9PBG7;E9PF82;Q13557;H0Y9J2;Q9UQM7;D6RHX9;E9PBE8;E7EQE4;H7BZC6;H0Y9C2;H7BXS4	D6R938;E9PBG7;E9PF82;Q13557;H0Y9J2	Calcium/calmodulin-dependent protein kinase type II subunit delta	CAMK2D	tr|D6R938|D6R938_HUMAN Calcium/calmodulin-dependent protein kinase (CaM kinase) II delta, isoform CRA_e OS=Homo sapiens GN=CAMK2D PE=1 SV=1;tr|E9PBG7|E9PBG7_HUMAN Calcium/calmodulin-dependent protein kinase type II subunit delta OS=Homo sapiens GN=CAMK2D P	56298	0	48.15	966700	935160	861570
D6R9P2;Q9BUT1	D6R9P2;Q9BUT1	3-hydroxybutyrate dehydrogenase type 2	SLC9B2;BDH2	tr|D6R9P2|D6R9P2_HUMAN Mitochondrial sodium/hydrogen exchanger 9B2 OS=Homo sapiens GN=SLC9B2 PE=4 SV=1;sp|Q9BUT1|BDH2_HUMAN 3-hydroxybutyrate dehydrogenase type 2 OS=Homo sapiens GN=BDH2 PE=1 SV=2	12375	0	28534	0	0	410500
D6RA82;P12429	D6RA82;P12429	Annexin;Annexin A3	ANXA3	tr|D6RA82|D6RA82_HUMAN Annexin OS=Homo sapiens GN=ANXA3 PE=1 SV=1;sp|P12429|ANXA3_HUMAN Annexin A3 OS=Homo sapiens GN=ANXA3 PE=1 SV=3	32118	0	65951	1005300	60866	94797
D6RAX2;Q13363;H0Y8W7;E9PGB1;H0Y9M9;E7ESU7;E7EPF8	D6RAX2;Q13363;H0Y8W7	C-terminal-binding protein 1	CTBP1	tr|D6RAX2|D6RAX2_HUMAN C-terminal-binding protein 1 (Fragment) OS=Homo sapiens GN=CTBP1 PE=1 SV=7;sp|Q13363|CTBP1_HUMAN C-terminal-binding protein 1 OS=Homo sapiens GN=CTBP1 PE=1 SV=2;tr|H0Y8W7|H0Y8W7_HUMAN C-terminal-binding protein 1 (Fragment) OS=Homo s	20346	0	41835	0	74229	142220
D6RAX7;Q9BT78;D6RFN0;D6RD63	D6RAX7;Q9BT78;D6RFN0;D6RD63	COP9 signalosome complex subunit 4	COPS4	tr|D6RAX7|D6RAX7_HUMAN COP9 constitutive photomorphogenic-like protein subunit 4 isoform 2 OS=Homo sapiens GN=COPS4 PE=1 SV=1;sp|Q9BT78|CSN4_HUMAN COP9 signalosome complex subunit 4 OS=Homo sapiens GN=COPS4 PE=1 SV=1;tr|D6RFN0|D6RFN0_HUMAN COP9 signalosome	47726	0	77136	405110	1152500	1088000
H0Y8J7;D6RBW1;P06730;D6RHE2;H0Y8X3;A6NMX2	H0Y8J7;D6RBW1;P06730;D6RHE2;H0Y8X3;A6NMX2	Eukaryotic translation initiation factor 4E;Eukaryotic translation initiation factor 4E type 1B	EIF4E;EIF4E1B	tr|H0Y8J7|H0Y8J7_HUMAN Eukaryotic translation initiation factor 4E (Fragment) OS=Homo sapiens GN=EIF4E PE=1 SV=1;tr|D6RBW1|D6RBW1_HUMAN Eukaryotic translation initiation factor 4E OS=Homo sapiens GN=EIF4E PE=1 SV=1;sp|P06730|IF4E_HUMAN Eukaryotic translati	18355	0	26276	0	62593	96223
D6RCF2;O75367;B4DJC3;Q5SQT3;Q9P0M6	D6RCF2;O75367;B4DJC3;Q5SQT3;Q9P0M6	Histone H2A;Core histone macro-H2A.1;Core histone macro-H2A.2	H2AFY;H2AFY2	tr|D6RCF2|D6RCF2_HUMAN Histone H2A OS=Homo sapiens GN=H2AFY PE=1 SV=1;sp|O75367|H2AY_HUMAN Core histone macro-H2A.1 OS=Homo sapiens GN=H2AFY PE=1 SV=4;tr|B4DJC3|B4DJC3_HUMAN Histone H2A OS=Homo sapiens GN=H2AFY PE=1 SV=1;tr|Q5SQT3|Q5SQT3_HUMAN Histone H2A	17575	0	41206	0	58516	514590
D6RCQ8;D6RF77;O95394;D6RIS6;A0A087WT27;J3KN95;D6RCD1;D6RC77	D6RCQ8;D6RF77;O95394;D6RIS6;A0A087WT27;J3KN95	Phosphoacetylglucosamine mutase	PGM3	tr|D6RCQ8|D6RCQ8_HUMAN Phosphoacetylglucosamine mutase (Fragment) OS=Homo sapiens GN=PGM3 PE=1 SV=7;tr|D6RF77|D6RF77_HUMAN Phosphoacetylglucosamine mutase (Fragment) OS=Homo sapiens GN=PGM3 PE=1 SV=7;sp|O95394|AGM1_HUMAN Phosphoacetylglucosamine mutase OS=	16086	0	13557	0	249920	216310
D6RHZ5;D6REX3;O94979;H7BXG7;H0Y8V7;H0YAB3;H0Y9K1;H0Y9T9	D6RHZ5;D6REX3;O94979;H7BXG7;H0Y8V7;H0YAB3	Protein transport protein Sec31A	SEC31A	tr|D6RHZ5|D6RHZ5_HUMAN Protein transport protein Sec31A OS=Homo sapiens GN=SEC31A PE=1 SV=1;tr|D6REX3|D6REX3_HUMAN Protein transport protein Sec31A OS=Homo sapiens GN=SEC31A PE=1 SV=1;sp|O94979|SC31A_HUMAN Protein transport protein Sec31A OS=Homo sapiens G	96502	0	14541	156260	203800	484070
D6RFM5;P31040;A0A087X1I3;H0Y8X1	D6RFM5;P31040;A0A087X1I3	Succinate dehydrogenase [ubiquinone] flavoprotein subunit, mitochondrial	SDHA	tr|D6RFM5|D6RFM5_HUMAN Succinate dehydrogenase [ubiquinone] flavoprotein subunit, mitochondrial OS=Homo sapiens GN=SDHA PE=1 SV=1;sp|P31040|SDHA_HUMAN Succinate dehydrogenase [ubiquinone] flavoprotein subunit, mitochondrial OS=Homo sapiens GN=SDHA PE=1 SV=	63566	0	41408	908310	523840	461600
H0Y8L7;E9PFI5;D6RG13;P61247;D6RB09;D6RAT0;D6RED7;D6RAS7;H0Y9Y4;D6RGE0;D6RI02;D6R9B6	H0Y8L7;E9PFI5;D6RG13;P61247;D6RB09;D6RAT0;D6RED7;D6RAS7;H0Y9Y4	40S ribosomal protein S3a	RPS3A	tr|H0Y8L7|H0Y8L7_HUMAN 40S ribosomal protein S3a (Fragment) OS=Homo sapiens GN=RPS3A PE=1 SV=1;tr|E9PFI5|E9PFI5_HUMAN 40S ribosomal protein S3a OS=Homo sapiens GN=RPS3A PE=1 SV=1;tr|D6RG13|D6RG13_HUMAN 40S ribosomal protein S3a (Fragment) OS=Homo sapiens G	22137	0	25315	0	421500	426710
D6RIE3;D6RGV5;H0UI06;P14406;D6R9C3	D6RIE3;D6RGV5;H0UI06;P14406;D6R9C3	Cytochrome c oxidase subunit 7A2, mitochondrial	COX7A2	tr|D6RIE3|D6RIE3_HUMAN Cytochrome c oxidase subunit 7A2, mitochondrial OS=Homo sapiens GN=COX7A2 PE=1 SV=1;tr|D6RGV5|D6RGV5_HUMAN Cytochrome c oxidase subunit 7A2, mitochondrial (Fragment) OS=Homo sapiens GN=COX7A2 PE=1 SV=1;tr|H0UI06|H0UI06_HUMAN Cytochro	10264	0	62763	0	0	92832
D6RGW9;Q96KX1	D6RGW9;Q96KX1	Uncharacterized protein C4orf36	C4orf36	tr|D6RGW9|D6RGW9_HUMAN Uncharacterized protein C4orf36 (Fragment) OS=Homo sapiens GN=C4orf36 PE=4 SV=1;sp|Q96KX1|CD036_HUMAN Uncharacterized protein C4orf36 OS=Homo sapiens GN=C4orf36 PE=4 SV=2	12.85	0.00086881	21622	0	0	161770
D6RJ96;E9PDE8;O95757	D6RJ96;E9PDE8;O95757	Heat shock 70 kDa protein 4L	HSPA4L	tr|D6RJ96|D6RJ96_HUMAN Heat shock 70 kDa protein 4L (Fragment) OS=Homo sapiens GN=HSPA4L PE=1 SV=1;tr|E9PDE8|E9PDE8_HUMAN Heat shock 70 kDa protein 4L OS=Homo sapiens GN=HSPA4L PE=1 SV=1;sp|O95757|HS74L_HUMAN Heat shock 70 kDa protein 4L OS=Homo sapiens GN	59196	0.002461	16286	0	0	5697.2
E9PCZ3;D6RJC3;E7EQN9;O15327;E9PG59;E9PHC0	E9PCZ3;D6RJC3;E7EQN9;O15327;E9PG59;E9PHC0	Type II inositol 3,4-bisphosphate 4-phosphatase	INPP4B	tr|E9PCZ3|E9PCZ3_HUMAN Type II inositol 3,4-bisphosphate 4-phosphatase (Fragment) OS=Homo sapiens GN=INPP4B PE=1 SV=1;tr|D6RJC3|D6RJC3_HUMAN Type II inositol 3,4-bisphosphate 4-phosphatase (Fragment) OS=Homo sapiens GN=INPP4B PE=1 SV=1;tr|E7EQN9|E7EQN9_HUM	78154	0	46633	0	40432	0
E2QRG8;Q00765	E2QRG8;Q00765	Receptor expression-enhancing protein;Receptor expression-enhancing protein 5	REEP5	tr|E2QRG8|E2QRG8_HUMAN Receptor expression-enhancing protein (Fragment) OS=Homo sapiens GN=REEP5 PE=1 SV=1;sp|Q00765|REEP5_HUMAN Receptor expression-enhancing protein 5 OS=Homo sapiens GN=REEP5 PE=1 SV=3	18121	0.00088028	22431	0	0	84431
E5KLK1;E5KLJ6;E5KLJ9;E5KLJ5;O60313	E5KLK1;E5KLJ6;E5KLJ9;E5KLJ5;O60313	Dynamin-like 120 kDa protein, mitochondrial;Dynamin-like 120 kDa protein, form S1	OPA1	tr|E5KLK1|E5KLK1_HUMAN Dynamin-like 120 kDa protein, mitochondrial OS=Homo sapiens GN=OPA1 PE=1 SV=1;tr|E5KLJ6|E5KLJ6_HUMAN Dynamin-like 120 kDa protein, mitochondrial OS=Homo sapiens GN=OPA1 PE=1 SV=1;tr|E5KLJ9|E5KLJ9_HUMAN Dynamin-like 120 kDa protein, m	111.82	0	54944	66142	159220	38062
E5RFU0;E5RHK9;E9PKP6;E9PI56;E5RFC6;E5RK51;E5RIJ5;E9PLJ8;E5RGY9;E9PDG8;Q13492;O60641	E5RFU0;E5RHK9;E9PKP6;E9PI56;E5RFC6;E5RK51;E5RIJ5;E9PLJ8;E5RGY9;E9PDG8;Q13492;O60641	Phosphatidylinositol-binding clathrin assembly protein;Clathrin coat assembly protein AP180	SNAP91;PICALM	tr|E5RFU0|E5RFU0_HUMAN Clathrin coat assembly protein AP180 (Fragment) OS=Homo sapiens GN=SNAP91 PE=1 SV=2;tr|E5RHK9|E5RHK9_HUMAN Clathrin coat assembly protein AP180 OS=Homo sapiens GN=SNAP91 PE=1 SV=1;tr|E9PKP6|E9PKP6_HUMAN Phosphatidylinositol-binding c	12865	0	34148	0	11475	0
E5RK27;E5RFP6;E5RJN6;E5RHZ6;Q9Y277	E5RK27;E5RFP6;E5RJN6;E5RHZ6;Q9Y277	Voltage-dependent anion-selective channel protein 3	VDAC3	tr|E5RK27|E5RK27_HUMAN Voltage-dependent anion-selective channel protein 3 (Fragment) OS=Homo sapiens GN=VDAC3 PE=1 SV=1;tr|E5RFP6|E5RFP6_HUMAN Voltage-dependent anion-selective channel protein 3 OS=Homo sapiens GN=VDAC3 PE=1 SV=1;tr|E5RJN6|E5RJN6_HUMAN Vo	11854	0	2747	0	0	75058
E5RFX7;E5RG77;O94903	E5RFX7;E5RG77;O94903	Proline synthase co-transcribed bacterial homolog protein	PROSC	tr|E5RFX7|E5RFX7_HUMAN Proline synthase co-transcribed bacterial homolog protein (Fragment) OS=Homo sapiens GN=PROSC PE=1 SV=1;tr|E5RG77|E5RG77_HUMAN Proline synthase co-transcribed bacterial homolog protein (Fragment) OS=Homo sapiens GN=PROSC PE=1 SV=1;sp	15.34	0	37917	0	0	18593
E5RG13;E5RIP7;H0YBL1;P29218	E5RG13;E5RIP7;H0YBL1;P29218	Inositol monophosphatase 1	IMPA1	tr|E5RG13|E5RG13_HUMAN Inositol monophosphatase 1 (Fragment) OS=Homo sapiens GN=IMPA1 PE=1 SV=1;tr|E5RIP7|E5RIP7_HUMAN Inositol monophosphatase 1 (Fragment) OS=Homo sapiens GN=IMPA1 PE=1 SV=7;tr|H0YBL1|H0YBL1_HUMAN Inositol monophosphatase 1 (Fragment) OS=	17059	0	80959	0	0	135310
E5RG17;Q6P1N9;H0YBX2;G5EA19;E5RGF2;U3KQS5;A0A0D9SGD3;E5RID7;E5RG62;E5RK70	E5RG17;Q6P1N9;H0YBX2;G5EA19;E5RGF2;U3KQS5;A0A0D9SGD3	Putative deoxyribonuclease TATDN1	TATDN1	tr|E5RG17|E5RG17_HUMAN Putative deoxyribonuclease TATDN1 (Fragment) OS=Homo sapiens GN=TATDN1 PE=1 SV=1;sp|Q6P1N9|TATD1_HUMAN Putative deoxyribonuclease TATDN1 OS=Homo sapiens GN=TATDN1 PE=1 SV=2;tr|H0YBX2|H0YBX2_HUMAN Putative deoxyribonuclease TATDN1 (Fr	36418	0	83563	168410	469200	162600
E5RGZ4;P13929;K7EPM1;K7EKN2;E5RI09;E5RG95;K7EP84;E5RJH5	E5RGZ4;P13929;K7EPM1;K7EKN2	Enolase;Beta-enolase	ENO3	tr|E5RGZ4|E5RGZ4_HUMAN Beta-enolase (Fragment) OS=Homo sapiens GN=ENO3 PE=1 SV=1;sp|P13929|ENOB_HUMAN Beta-enolase OS=Homo sapiens GN=ENO3 PE=1 SV=5;tr|K7EPM1|K7EPM1_HUMAN Beta-enolase (Fragment) OS=Homo sapiens GN=ENO3 PE=1 SV=1;tr|K7EKN2|K7EKN2_HUMAN Bet	30402	0	122.05	4429800	3352400	2422200
E5RIS0;E5RH15;Q96CD0	E5RIS0;E5RH15;Q96CD0	F-box/LRR-repeat protein 8	FBXL8	tr|E5RIS0|E5RIS0_HUMAN F-box/LRR-repeat protein 8 (Fragment) OS=Homo sapiens GN=FBXL8 PE=1 SV=7;tr|E5RH15|E5RH15_HUMAN F-box/LRR-repeat protein 8 (Fragment) OS=Homo sapiens GN=FBXL8 PE=1 SV=1;sp|Q96CD0|FBXL8_HUMAN F-box/LRR-repeat protein 8 OS=Homo sapiens	14209	0	28464	0	0	19205
E5RK69	E5RK69	Annexin	ANXA6	tr|E5RK69|E5RK69_HUMAN Annexin OS=Homo sapiens GN=ANXA6 PE=1 SV=1	51776	0.0056818	1561	126390	0	0
E9PD92;E7EM57;E7EUI8;P11413	E9PD92;E7EM57;E7EUI8;P11413	Glucose-6-phosphate 1-dehydrogenase	G6PD	tr|E9PD92|E9PD92_HUMAN Glucose-6-phosphate 1-dehydrogenase (Fragment) OS=Homo sapiens GN=G6PD PE=1 SV=1;tr|E7EM57|E7EM57_HUMAN Glucose-6-phosphate 1-dehydrogenase (Fragment) OS=Homo sapiens GN=G6PD PE=1 SV=1;tr|E7EUI8|E7EUI8_HUMAN Glucose-6-phosphate 1-deh	29502	0	27793	0	81483	65882
E7EM64;Q7L5N1	E7EM64;Q7L5N1	COP9 signalosome complex subunit 6	COPS6	tr|E7EM64|E7EM64_HUMAN COP9 signalosome complex subunit 6 OS=Homo sapiens GN=COPS6 PE=1 SV=1;sp|Q7L5N1|CSN6_HUMAN COP9 signalosome complex subunit 6 OS=Homo sapiens GN=COPS6 PE=1 SV=1	36064	0	67946	0	375500	734050
E7EMM4;Q13510	E7EMM4;Q13510	Acid ceramidase;Acid ceramidase subunit alpha;Acid ceramidase subunit beta	ASAH1	tr|E7EMM4|E7EMM4_HUMAN Acid ceramidase OS=Homo sapiens GN=ASAH1 PE=1 SV=1;sp|Q13510|ASAH1_HUMAN Acid ceramidase OS=Homo sapiens GN=ASAH1 PE=1 SV=5	41796	0	40941	253720	134690	0
K7EJL1;E7ENJ6;Q9BXS5	K7EJL1;E7ENJ6;Q9BXS5	AP-1 complex subunit mu-1	AP1M1	tr|K7EJL1|K7EJL1_HUMAN AP-1 complex subunit mu-1 OS=Homo sapiens GN=AP1M1 PE=1 SV=1;tr|E7ENJ6|E7ENJ6_HUMAN AP-1 complex subunit mu-1 OS=Homo sapiens GN=AP1M1 PE=1 SV=1;sp|Q9BXS5|AP1M1_HUMAN AP-1 complex subunit mu-1 OS=Homo sapiens GN=AP1M1 PE=1 SV=3	40296	0.0040783	15874	0	0	24598
E7ENL6;P12111;C9JNG9	E7ENL6;P12111	Collagen alpha-3(VI) chain	COL6A3	tr|E7ENL6|E7ENL6_HUMAN Collagen alpha-3(VI) chain OS=Homo sapiens GN=COL6A3 PE=1 SV=2;sp|P12111|CO6A3_HUMAN Collagen alpha-3(VI) chain OS=Homo sapiens GN=COL6A3 PE=1 SV=5	278.11	0	95454	412960	1680900	2549200
E7ENZ3;P48643;B7ZAR1;E9PCA1;D6RIZ7	E7ENZ3;P48643;B7ZAR1;E9PCA1	T-complex protein 1 subunit epsilon	CCT5	tr|E7ENZ3|E7ENZ3_HUMAN T-complex protein 1 subunit epsilon OS=Homo sapiens GN=CCT5 PE=1 SV=1;sp|P48643|TCPE_HUMAN T-complex protein 1 subunit epsilon OS=Homo sapiens GN=CCT5 PE=1 SV=1;tr|B7ZAR1|B7ZAR1_HUMAN T-complex protein 1 subunit epsilon OS=Homo sapie	53848	0	69634	825010	846980	507830
E7EPB3;P50914	E7EPB3;P50914	60S ribosomal protein L14	RPL14	tr|E7EPB3|E7EPB3_HUMAN 60S ribosomal protein L14 OS=Homo sapiens GN=RPL14 PE=1 SV=1;sp|P50914|RL14_HUMAN 60S ribosomal protein L14 OS=Homo sapiens GN=RPL14 PE=1 SV=4	14558	0	84367	0	0	120600
E7ES33;E7EPK1;Q16181;A0A0U1RRH9;A0A0U1RRE1;G3V1Q4;A0A0U1RQK0;A0A0U1RRD1;Q6ZU15	E7ES33;E7EPK1;Q16181;A0A0U1RRH9;A0A0U1RRE1;G3V1Q4	Septin-7	SEPT7	tr|E7ES33|E7ES33_HUMAN Septin-7 OS=Homo sapiens GN=SEPT7 PE=1 SV=3;tr|E7EPK1|E7EPK1_HUMAN Septin-7 OS=Homo sapiens GN=SEPT7 PE=1 SV=2;sp|Q16181|SEPT7_HUMAN Septin-7 OS=Homo sapiens GN=SEPT7 PE=1 SV=2;tr|A0A0U1RRH9|A0A0U1RRH9_HUMAN Septin-7 (Fragment) OS=Ho	48715	0	39909	671980	317600	368950
E7EPM6;P33121;B7Z3Z9;D6RER0;H0Y9U7;H0Y9Z9;D6RG07;E7ERD7;Q9ULC5;Q9UKU0	E7EPM6;P33121;B7Z3Z9	Long-chain-fatty-acid--CoA ligase 1	ACSL1	tr|E7EPM6|E7EPM6_HUMAN Long-chain-fatty-acid--CoA ligase 1 OS=Homo sapiens GN=ACSL1 PE=1 SV=1;sp|P33121|ACSL1_HUMAN Long-chain-fatty-acid--CoA ligase 1 OS=Homo sapiens GN=ACSL1 PE=1 SV=1;tr|B7Z3Z9|B7Z3Z9_HUMAN Long-chain-fatty-acid--CoA ligase 1 OS=Homo sa	74281	0	37054	1852800	1644000	1843600
J3KT55;E7EPS8;P28827	J3KT55;E7EPS8;P28827	Protein-tyrosine-phosphatase;Receptor-type tyrosine-protein phosphatase mu	PTPRM	tr|J3KT55|J3KT55_HUMAN Receptor-type tyrosine-protein phosphatase mu (Fragment) OS=Homo sapiens GN=PTPRM PE=1 SV=1;tr|E7EPS8|E7EPS8_HUMAN Receptor-type tyrosine-protein phosphatase mu OS=Homo sapiens GN=PTPRM PE=1 SV=2;sp|P28827|PTPRM_HUMAN Receptor-type t	26481	0	69578	0	0	9610.4
E7EQB2;E7ER44;P02788	E7EQB2;E7ER44;P02788	Lactotransferrin;Lactoferricin-H;Kaliocin-1;Lactoferroxin-A;Lactoferroxin-B;Lactoferroxin-C	LTF	tr|E7EQB2|E7EQB2_HUMAN Lactotransferrin (Fragment) OS=Homo sapiens GN=LTF PE=1 SV=1;tr|E7ER44|E7ER44_HUMAN Lactotransferrin OS=Homo sapiens GN=LTF PE=1 SV=1;sp|P02788|TRFL_HUMAN Lactotransferrin OS=Homo sapiens GN=LTF PE=1 SV=6	76625	0	30315	218900	0	0
E7EQR4;P15311	E7EQR4;P15311	Ezrin	EZR	tr|E7EQR4|E7EQR4_HUMAN Ezrin OS=Homo sapiens GN=EZR PE=1 SV=3;sp|P15311|EZRI_HUMAN Ezrin OS=Homo sapiens GN=EZR PE=1 SV=4	69371	0	33919	1093200	151960	98830
E7EQV9;P61313;E7EX53;E7ENU7;E7ERA2	E7EQV9;P61313;E7EX53;E7ENU7	Ribosomal protein L15;60S ribosomal protein L15	RPL15	tr|E7EQV9|E7EQV9_HUMAN Ribosomal protein L15 (Fragment) OS=Homo sapiens GN=RPL15 PE=1 SV=1;sp|P61313|RL15_HUMAN 60S ribosomal protein L15 OS=Homo sapiens GN=RPL15 PE=1 SV=2;tr|E7EX53|E7EX53_HUMAN Ribosomal protein L15 (Fragment) OS=Homo sapiens GN=RPL15 PE	20.51	0	76689	400370	388440	152300
E7ER27;E7EWE5;P51659;G5E9S2;E7ET17	E7ER27;E7EWE5;P51659;G5E9S2;E7ET17	Peroxisomal multifunctional enzyme type 2;(3R)-hydroxyacyl-CoA dehydrogenase;Enoyl-CoA hydratase 2	HSD17B4	tr|E7ER27|E7ER27_HUMAN Peroxisomal multifunctional enzyme type 2 OS=Homo sapiens GN=HSD17B4 PE=1 SV=3;tr|E7EWE5|E7EWE5_HUMAN Peroxisomal multifunctional enzyme type 2 OS=Homo sapiens GN=HSD17B4 PE=1 SV=1;sp|P51659|DHB4_HUMAN Peroxisomal multifunctional enz	53928	0	79464	0	51610	0
E9PGX9;E9PFL9;E7ERC4;P05455	E9PGX9;E9PFL9;E7ERC4;P05455	Lupus La protein	SSB	tr|E9PGX9|E9PGX9_HUMAN Lupus La protein (Fragment) OS=Homo sapiens GN=SSB PE=1 SV=1;tr|E9PFL9|E9PFL9_HUMAN Lupus La protein OS=Homo sapiens GN=SSB PE=1 SV=1;tr|E7ERC4|E7ERC4_HUMAN Lupus La protein (Fragment) OS=Homo sapiens GN=SSB PE=1 SV=1;sp|P05455|LA_HU	13909	0.0093023	13342	0	0	24545
E7ERI8;E7EW49;C9J668;D6RBU8;B3KR06;E7ENG2;E3W994;J3KR49;A0A0U1RQI6;O75122	E7ERI8;E7EW49;C9J668;D6RBU8;B3KR06;E7ENG2;E3W994;J3KR49;A0A0U1RQI6;O75122	CLIP-associating protein 2	CLASP2	tr|E7ERI8|E7ERI8_HUMAN CLIP-associating protein 2 OS=Homo sapiens GN=CLASP2 PE=1 SV=1;tr|E7EW49|E7EW49_HUMAN CLIP-associating protein 2 OS=Homo sapiens GN=CLASP2 PE=1 SV=1;tr|C9J668|C9J668_HUMAN CLIP-associating protein 2 (Fragment) OS=Homo sapiens GN=CLAS	165.63	0.001705	19958	0	101210	154560
E7ESC6;Q9UIA9;E5RIW1;H0YBE1	E7ESC6;Q9UIA9	Exportin-7	XPO7	tr|E7ESC6|E7ESC6_HUMAN Exportin-7 OS=Homo sapiens GN=XPO7 PE=1 SV=1;sp|Q9UIA9|XPO7_HUMAN Exportin-7 OS=Homo sapiens GN=XPO7 PE=1 SV=3	124.07	0	61828	118140	367970	1502900
E7ETZ4;Q9Y6E2;B5MCH7;B5MCE7;E9PFD4;Q75MG1;E7EMS9;E9PFE3;C9JF98;F8WDX8;Q7L1Q6	E7ETZ4;Q9Y6E2;B5MCH7;B5MCE7;E9PFD4;Q75MG1	Basic leucine zipper and W2 domain-containing protein 2	BZW2	tr|E7ETZ4|E7ETZ4_HUMAN Basic leucine zipper and W2 domain-containing protein 2 (Fragment) OS=Homo sapiens GN=BZW2 PE=1 SV=1;sp|Q9Y6E2|BZW2_HUMAN Basic leucine zipper and W2 domain-containing protein 2 OS=Homo sapiens GN=BZW2 PE=1 SV=1;tr|B5MCH7|B5MCH7_HUMA	46913	0	30922	415390	1959200	2678600
E7EU05;P16671;E9PLT1;E9PJX8;E9PC45;E7EVU1;E7ERZ9;E7EWI4;E7EX47	E7EU05;P16671;E9PLT1	Platelet glycoprotein 4	CD36	tr|E7EU05|E7EU05_HUMAN Platelet glycoprotein 4 (Fragment) OS=Homo sapiens GN=CD36 PE=1 SV=2;sp|P16671|CD36_HUMAN Platelet glycoprotein 4 OS=Homo sapiens GN=CD36 PE=1 SV=2;tr|E9PLT1|E9PLT1_HUMAN Platelet glycoprotein 4 OS=Homo sapiens GN=CD36 PE=1 SV=1	52062	0	40474	1103000	847200	589310
E7EU96;Q5U5J2;P68400;Q8NEV1;A0A087WY74	E7EU96;Q5U5J2;P68400;Q8NEV1	Casein kinase II subunit alpha;Casein kinase II subunit alpha 3	CSNK2A1;CSNK2A3	tr|E7EU96|E7EU96_HUMAN Casein kinase II subunit alpha OS=Homo sapiens GN=CSNK2A1 PE=1 SV=1;tr|Q5U5J2|Q5U5J2_HUMAN CSNK2A1 protein OS=Homo sapiens GN=CSNK2A1 PE=1 SV=1;sp|P68400|CSK21_HUMAN Casein kinase II subunit alpha OS=Homo sapiens GN=CSNK2A1 PE=1 SV=1	45.31	0	68804	0	365850	205660
E7EVJ5;Q96F07;H7C229;A0A087WVE1;A0A087WTQ3;A0A087WWZ1;E7EW33;A0A0G2JRX2;A0A087WU52;A0A0G2JRV9;A0A087WWL1;A0A087WV63;A0A0G2JRF5;A0A087WWY5;H0YL50	E7EVJ5;Q96F07;H7C229;A0A087WVE1;A0A087WTQ3;A0A087WWZ1;E7EW33	Cytoplasmic FMR1-interacting protein 2	CYFIP2	tr|E7EVJ5|E7EVJ5_HUMAN Cytoplasmic FMR1-interacting protein 2 OS=Homo sapiens GN=CYFIP2 PE=1 SV=1;sp|Q96F07|CYFP2_HUMAN Cytoplasmic FMR1-interacting protein 2 OS=Homo sapiens GN=CYFIP2 PE=1 SV=2;tr|H7C229|H7C229_HUMAN Cytoplasmic FMR1-interacting protein 2	142.58	0	26408	0	14822	0
F5H7K1;E7EWW0;Q7Z3J2;H3BVG8;H3BV68;C9J7I2;I3L1U5	F5H7K1;E7EWW0;Q7Z3J2;H3BVG8;H3BV68;C9J7I2	UPF0505 protein C16orf62	C16orf62	tr|F5H7K1|F5H7K1_HUMAN UPF0505 protein C16orf62 OS=Homo sapiens GN=C16orf62 PE=1 SV=1;tr|E7EWW0|E7EWW0_HUMAN UPF0505 protein C16orf62 OS=Homo sapiens GN=C16orf62 PE=1 SV=2;sp|Q7Z3J2|CP062_HUMAN UPF0505 protein C16orf62 OS=Homo sapiens GN=C16orf62 PE=1 SV=2	107.94	0	71211	0	52793	112980
Q5JWQ4;E7EX60;Q5T7F0;Q5JWQ6;E9PEP6;O14786	Q5JWQ4;E7EX60;Q5T7F0;Q5JWQ6;E9PEP6;O14786	Neuropilin-1	NRP1	tr|Q5JWQ4|Q5JWQ4_HUMAN Neuropilin-1 OS=Homo sapiens GN=NRP1 PE=1 SV=2;tr|E7EX60|E7EX60_HUMAN Neuropilin-1 OS=Homo sapiens GN=NRP1 PE=1 SV=1;tr|Q5T7F0|Q5T7F0_HUMAN Neuropilin-1 OS=Homo sapiens GN=NRP1 PE=1 SV=1;tr|Q5JWQ6|Q5JWQ6_HUMAN Neuropilin-1 OS=Homo sa	67292	0	26934	0	62307	0
E7EX90;Q14203;Q6AWB1;C9J1B7;C9JZA4;C9JTE5;C9JJN7;C9JJD0;C9JKG6;E9PCY0	E7EX90;Q14203;Q6AWB1	Dynactin subunit 1	DCTN1;DKFZp686E0752	tr|E7EX90|E7EX90_HUMAN Dynactin subunit 1 OS=Homo sapiens GN=DCTN1 PE=1 SV=1;sp|Q14203|DCTN1_HUMAN Dynactin subunit 1 OS=Homo sapiens GN=DCTN1 PE=1 SV=3;tr|Q6AWB1|Q6AWB1_HUMAN Dynactin subunit 1 OS=Homo sapiens GN=DKFZp686E0752 PE=1 SV=1	139.09	0	43136	0	178940	222540
H0YF10;E9PC52;Q16576;Q09028;H0YEU5;Q5JP02;H0YCT5;H0YDK2;Q5JP01	H0YF10;E9PC52;Q16576;Q09028;H0YEU5;Q5JP02;H0YCT5;H0YDK2;Q5JP01	Histone-binding protein RBBP7;Histone-binding protein RBBP4	RBBP4;RBBP7	tr|H0YF10|H0YF10_HUMAN Histone-binding protein RBBP4 (Fragment) OS=Homo sapiens GN=RBBP4 PE=1 SV=1;tr|E9PC52|E9PC52_HUMAN Histone-binding protein RBBP7 OS=Homo sapiens GN=RBBP7 PE=1 SV=1;sp|Q16576|RBBP7_HUMAN Histone-binding protein RBBP7 OS=Homo sapiens G	23194	0	39528	0	123670	149620
E9PCN2;Q02153;B7Z685;D6RC99	E9PCN2;Q02153;B7Z685;D6RC99	Guanylate cyclase soluble subunit beta-1	GUCY1B3	tr|E9PCN2|E9PCN2_HUMAN Guanylate cyclase soluble subunit beta-1 OS=Homo sapiens GN=GUCY1B3 PE=1 SV=1;sp|Q02153|GCYB1_HUMAN Guanylate cyclase soluble subunit beta-1 OS=Homo sapiens GN=GUCY1B3 PE=1 SV=1;tr|B7Z685|B7Z685_HUMAN Guanylate cyclase 1, soluble, be	73071	0	52972	0	11295	23470
E9PCR7;Q02218;A0A0D9SFS3;E9PDF2;E9PFG7;Q9ULD0;C9J4G7	E9PCR7;Q02218;A0A0D9SFS3;E9PDF2;E9PFG7	2-oxoglutarate dehydrogenase, mitochondrial	OGDH	tr|E9PCR7|E9PCR7_HUMAN 2-oxoglutarate dehydrogenase, mitochondrial OS=Homo sapiens GN=OGDH PE=1 SV=1;sp|Q02218|ODO1_HUMAN 2-oxoglutarate dehydrogenase, mitochondrial OS=Homo sapiens GN=OGDH PE=1 SV=3;tr|A0A0D9SFS3|A0A0D9SFS3_HUMAN 2-oxoglutarate dehydrogen	117.66	0	37725	549780	810190	152030
E9PCY7;G8JLB6;P31943;H0YB39;E5RGH4;E5RGV0;D6RIU0;H0YBG7;H0YBD7;D6RBM0;P52597;E7EQJ0;D6RAM1;H0YAQ2;D6R9T0;D6RFM3;D6RIT2;E7EN40;D6RDU3;D6RJ04;D6RIH9	E9PCY7;G8JLB6;P31943;H0YB39;E5RGH4;E5RGV0;D6RIU0;H0YBG7;H0YBD7;D6RBM0;P52597	Heterogeneous nuclear ribonucleoprotein H;Heterogeneous nuclear ribonucleoprotein H, N-terminally processed;Heterogeneous nuclear ribonucleoprotein F;Heterogeneous nuclear ribonucleoprotein F, N-terminally processed	HNRNPH1;HNRNPF	tr|E9PCY7|E9PCY7_HUMAN Heterogeneous nuclear ribonucleoprotein H OS=Homo sapiens GN=HNRNPH1 PE=1 SV=1;tr|G8JLB6|G8JLB6_HUMAN Heterogeneous nuclear ribonucleoprotein H OS=Homo sapiens GN=HNRNPH1 PE=1 SV=1;sp|P31943|HNRH1_HUMAN Heterogeneous nuclear ribonucl	47087	0	40676	0	236960	253090
E9PDI2;P40123;B7Z385;A0A087X0J3;A0A087WZ15;F8WDB9	E9PDI2;P40123;B7Z385;A0A087X0J3;A0A087WZ15	Adenylyl cyclase-associated protein;Adenylyl cyclase-associated protein 2	CAP2	tr|E9PDI2|E9PDI2_HUMAN Adenylyl cyclase-associated protein OS=Homo sapiens GN=CAP2 PE=1 SV=1;sp|P40123|CAP2_HUMAN Adenylyl cyclase-associated protein 2 OS=Homo sapiens GN=CAP2 PE=1 SV=1;tr|B7Z385|B7Z385_HUMAN Adenylyl cyclase-associated protein OS=Homo sap	49822	0	12174	0	115630	35397
H0YDD4;E9PEJ4;P10515	H0YDD4;E9PEJ4;P10515	Acetyltransferase component of pyruvate dehydrogenase complex;Dihydrolipoyllysine-residue acetyltransferase component of pyruvate dehydrogenase complex, mitochondrial	DLAT	tr|H0YDD4|H0YDD4_HUMAN Acetyltransferase component of pyruvate dehydrogenase complex (Fragment) OS=Homo sapiens GN=DLAT PE=1 SV=1;tr|E9PEJ4|E9PEJ4_HUMAN Acetyltransferase component of pyruvate dehydrogenase complex OS=Homo sapiens GN=DLAT PE=1 SV=1;sp|P105	51201	0.00086806	21586	0	57827	0
E9PEM5;P50851;H0YAC6	E9PEM5;P50851;H0YAC6	Lipopolysaccharide-responsive and beige-like anchor protein	LRBA	tr|E9PEM5|E9PEM5_HUMAN Lipopolysaccharide-responsive and beige-like anchor protein OS=Homo sapiens GN=LRBA PE=1 SV=1;sp|P50851|LRBA_HUMAN Lipopolysaccharide-responsive and beige-like anchor protein OS=Homo sapiens GN=LRBA PE=1 SV=4;tr|H0YAC6|H0YAC6_HUMAN L	286.97	0	10263	0	38559	62650
E9PEX6;P09622	E9PEX6;P09622	Dihydrolipoyl dehydrogenase;Dihydrolipoyl dehydrogenase, mitochondrial	DLD	tr|E9PEX6|E9PEX6_HUMAN Dihydrolipoyl dehydrogenase OS=Homo sapiens GN=DLD PE=1 SV=1;sp|P09622|DLDH_HUMAN Dihydrolipoyl dehydrogenase, mitochondrial OS=Homo sapiens GN=DLD PE=1 SV=2	51815	0	74916	0	125530	79851
E9PGF5;E9PF55;Q9HBL0;E7EMG1;E7ERH1;H0Y4U1;A0A087WWW7;H7C3Z4;F8VV64;Q63HR2;Q68CZ2	E9PGF5;E9PF55;Q9HBL0;E7EMG1;E7ERH1;H0Y4U1;A0A087WWW7	Tensin-1	TNS1	tr|E9PGF5|E9PGF5_HUMAN Tensin-1 OS=Homo sapiens GN=TNS1 PE=1 SV=1;tr|E9PF55|E9PF55_HUMAN Tensin-1 OS=Homo sapiens GN=TNS1 PE=1 SV=1;sp|Q9HBL0|TENS1_HUMAN Tensin-1 OS=Homo sapiens GN=TNS1 PE=1 SV=2;tr|E7EMG1|E7EMG1_HUMAN Tensin-1 (Fragment) OS=Homo sapiens	183.22	0	10781	237830	235450	362140
E9PF58;Q92747	E9PF58;Q92747	Actin-related protein 2/3 complex subunit 1A	ARPC1A	tr|E9PF58|E9PF58_HUMAN Actin-related protein 2/3 complex subunit 1A OS=Homo sapiens GN=ARPC1A PE=1 SV=1;sp|Q92747|ARC1A_HUMAN Actin-related protein 2/3 complex subunit 1A OS=Homo sapiens GN=ARPC1A PE=1 SV=2	30888	0.00088339	22696	0	171500	391270
E9PFH4;Q9Y5L0;C9J7E5	E9PFH4;Q9Y5L0;C9J7E5	Transportin-3	TNPO3	tr|E9PFH4|E9PFH4_HUMAN Transportin-3 OS=Homo sapiens GN=TNPO3 PE=1 SV=1;sp|Q9Y5L0|TNPO3_HUMAN Transportin-3 OS=Homo sapiens GN=TNPO3 PE=1 SV=3;tr|C9J7E5|C9J7E5_HUMAN Transportin-3 OS=Homo sapiens GN=TNPO3 PE=1 SV=1	96669	0	81432	0	48950	72887
E9PFN5;Q9Y2Q3;C9JNT3	E9PFN5;Q9Y2Q3;C9JNT3	Glutathione S-transferase kappa 1	GSTK1	tr|E9PFN5|E9PFN5_HUMAN Glutathione S-transferase kappa 1 OS=Homo sapiens GN=GSTK1 PE=1 SV=1;sp|Q9Y2Q3|GSTK1_HUMAN Glutathione S-transferase kappa 1 OS=Homo sapiens GN=GSTK1 PE=1 SV=3;tr|C9JNT3|C9JNT3_HUMAN Glutathione S-transferase kappa 1 (Fragment) OS=Ho	21707	0	15066	0	283290	169760
E9PFR3;Q14738;H0Y8C4;H0YJ35;H7C5Q9;Q96B13;H0YJ75;Q13362	E9PFR3;Q14738;H0Y8C4	Serine/threonine-protein phosphatase 2A 56 kDa regulatory subunit delta isoform	PPP2R5D	tr|E9PFR3|E9PFR3_HUMAN Serine/threonine-protein phosphatase 2A 56 kDa regulatory subunit delta isoform OS=Homo sapiens GN=PPP2R5D PE=1 SV=1;sp|Q14738|2A5D_HUMAN Serine/threonine-protein phosphatase 2A 56 kDa regulatory subunit delta isoform OS=Homo sapiens	69116	0	13348	127190	172430	396940
E9PGP6;Q9UGJ0;C9JUG1;H0YHF8;F8WDB5;F8VYY9;B4DUK8;P54619;Q9UGI9	E9PGP6;Q9UGJ0;C9JUG1	5-AMP-activated protein kinase subunit gamma-2	PRKAG2	tr|E9PGP6|E9PGP6_HUMAN 5-AMP-activated protein kinase subunit gamma-2 OS=Homo sapiens GN=PRKAG2 PE=1 SV=1;sp|Q9UGJ0|AAKG2_HUMAN 5-AMP-activated protein kinase subunit gamma-2 OS=Homo sapiens GN=PRKAG2 PE=1 SV=1;tr|C9JUG1|C9JUG1_HUMAN 5-AMP-activated pro	50.25	0	13878	323580	395160	796500
E9PGT6;Q99627;H7C3S9	E9PGT6;Q99627;H7C3S9	COP9 signalosome complex subunit 8	COPS8	tr|E9PGT6|E9PGT6_HUMAN COP9 signalosome complex subunit 8 OS=Homo sapiens GN=COPS8 PE=1 SV=1;sp|Q99627|CSN8_HUMAN COP9 signalosome complex subunit 8 OS=Homo sapiens GN=COPS8 PE=1 SV=1;tr|H7C3S9|H7C3S9_HUMAN COP9 signalosome complex subunit 8 (Fragment) OS=	19344	0	22187	0	120370	337350
E9PHS0;O43813;F8WDS9	E9PHS0;O43813;F8WDS9	LanC-like protein 1	LANCL1	tr|E9PHS0|E9PHS0_HUMAN LanC-like protein 1 (Fragment) OS=Homo sapiens GN=LANCL1 PE=1 SV=1;sp|O43813|LANC1_HUMAN LanC-like protein 1 OS=Homo sapiens GN=LANCL1 PE=1 SV=1;tr|F8WDS9|F8WDS9_HUMAN LanC-like protein 1 OS=Homo sapiens GN=LANCL1 PE=1 SV=1	22042	0	27609	1745200	3572800	2034200
I6L9B1;E9PII3;E9PK52;E9PHY5;O43491	I6L9B1;E9PII3;E9PK52;E9PHY5;O43491	Band 4.1-like protein 2	EPB41L2	tr|I6L9B1|I6L9B1_HUMAN Band 4.1-like protein 2 OS=Homo sapiens GN=EPB41L2 PE=1 SV=1;tr|E9PII3|E9PII3_HUMAN Band 4.1-like protein 2 OS=Homo sapiens GN=EPB41L2 PE=1 SV=1;tr|E9PK52|E9PK52_HUMAN Band 4.1-like protein 2 OS=Homo sapiens GN=EPB41L2 PE=1 SV=1;tr|E	71642	0	49013	0	0	153290
E9PI41;Q9NPD3	E9PI41;Q9NPD3	Exosome complex component RRP41	EXOSC4	tr|E9PI41|E9PI41_HUMAN Exosome complex component RRP41 (Fragment) OS=Homo sapiens GN=EXOSC4 PE=1 SV=7;sp|Q9NPD3|EXOS4_HUMAN Exosome complex component RRP41 OS=Homo sapiens GN=EXOSC4 PE=1 SV=3	28413	0	34047	0	0	56539
E9PIN3;Q9UBU9	E9PIN3;Q9UBU9	Nuclear RNA export factor 1	NXF1	tr|E9PIN3|E9PIN3_HUMAN Nuclear RNA export factor 1 (Fragment) OS=Homo sapiens GN=NXF1 PE=1 SV=1;sp|Q9UBU9|NXF1_HUMAN Nuclear RNA export factor 1 OS=Homo sapiens GN=NXF1 PE=1 SV=1	68106	0.0025126	18403	0	0	8973.7
E9PJ95;Q9P000	E9PJ95;Q9P000	COMM domain-containing protein 9	COMMD9	tr|E9PJ95|E9PJ95_HUMAN COMM domain-containing protein 9 OS=Homo sapiens GN=COMMD9 PE=1 SV=1;sp|Q9P000|COMD9_HUMAN COMM domain-containing protein 9 OS=Homo sapiens GN=COMMD9 PE=1 SV=2	20687	0	93563	0	24624	61321
E9PJD9;E9PLL6;E9PLX7;P46776	E9PJD9;E9PLL6;E9PLX7;P46776	60S ribosomal protein L27a	RPL27A	tr|E9PJD9|E9PJD9_HUMAN 60S ribosomal protein L27a OS=Homo sapiens GN=RPL27A PE=1 SV=1;tr|E9PLL6|E9PLL6_HUMAN 60S ribosomal protein L27a OS=Homo sapiens GN=RPL27A PE=1 SV=1;tr|E9PLX7|E9PLX7_HUMAN 60S ribosomal protein L27a OS=Homo sapiens GN=RPL27A PE=1 SV=	10127	0.0025381	19306	0	0	32232
G3V1A4;E9PK25;P23528;E9PQB7;E9PP50;E9PLJ3;E9PS23	G3V1A4;E9PK25;P23528;E9PQB7;E9PP50;E9PLJ3	Cofilin-1	CFL1	tr|G3V1A4|G3V1A4_HUMAN Cofilin 1 (Non-muscle), isoform CRA_a OS=Homo sapiens GN=CFL1 PE=1 SV=1;tr|E9PK25|E9PK25_HUMAN Cofilin-1 OS=Homo sapiens GN=CFL1 PE=1 SV=1;sp|P23528|COF1_HUMAN Cofilin-1 OS=Homo sapiens GN=CFL1 PE=1 SV=3;tr|E9PQB7|E9PQB7_HUMAN Cofili	16811	0	45239	0	435690	416400
E9PK47;P06737	E9PK47;P06737	Alpha-1,4 glucan phosphorylase;Glycogen phosphorylase, liver form	PYGL	tr|E9PK47|E9PK47_HUMAN Alpha-1,4 glucan phosphorylase OS=Homo sapiens GN=PYGL PE=1 SV=1;sp|P06737|PYGL_HUMAN Glycogen phosphorylase, liver form OS=Homo sapiens GN=PYGL PE=1 SV=4	94069	0	27977	0	0	8795
E9PKD5;E9PM69;R4GNH3;P17980;E9PMD8;E9PN50;E9PLG2	E9PKD5;E9PM69;R4GNH3;P17980;E9PMD8;E9PN50	26S protease regulatory subunit 6A	PSMC3	tr|E9PKD5|E9PKD5_HUMAN 26S protease regulatory subunit 6A (Fragment) OS=Homo sapiens GN=PSMC3 PE=1 SV=2;tr|E9PM69|E9PM69_HUMAN 26S protease regulatory subunit 6A OS=Homo sapiens GN=PSMC3 PE=1 SV=1;tr|R4GNH3|R4GNH3_HUMAN 26S protease regulatory subunit 6A O	34614	0	52401	292030	815550	412850
E9PKG1;H7C2I1;Q99873;E9PQ98;E9PIX6;E9PNR9;H0YDE4;A0A087X1W2;Q9NR22	E9PKG1;H7C2I1;Q99873;E9PQ98;E9PIX6;E9PNR9;H0YDE4;A0A087X1W2	Protein arginine N-methyltransferase 1	PRMT1	tr|E9PKG1|E9PKG1_HUMAN Protein arginine N-methyltransferase 1 OS=Homo sapiens GN=PRMT1 PE=1 SV=1;tr|H7C2I1|H7C2I1_HUMAN Protein arginine N-methyltransferase 1 OS=Homo sapiens GN=PRMT1 PE=1 SV=1;sp|Q99873|ANM1_HUMAN Protein arginine N-methyltransferase 1 OS	37709	0	30763	243200	919550	1057100
E9PN51;F8W9K7;E9PKH6;E9PPW7;O00217	E9PN51;F8W9K7;E9PKH6;E9PPW7;O00217	NADH dehydrogenase [ubiquinone] iron-sulfur protein 8, mitochondrial	NDUFS8	tr|E9PN51|E9PN51_HUMAN NADH dehydrogenase [ubiquinone] iron-sulfur protein 8, mitochondrial (Fragment) OS=Homo sapiens GN=NDUFS8 PE=1 SV=1;tr|F8W9K7|F8W9K7_HUMAN NADH dehydrogenase [ubiquinone] iron-sulfur protein 8, mitochondrial (Fragment) OS=Homo sapien	12405	0.0017212	21082	0	0	5707.1
E9PLK3;P55786;A6NEC2;H0YDG0;E9PP11;H0YCQ5;E9PJY4;E9PPD4;E9PI82;E9PJ74	E9PLK3;P55786	Puromycin-sensitive aminopeptidase	NPEPPS	tr|E9PLK3|E9PLK3_HUMAN Puromycin-sensitive aminopeptidase OS=Homo sapiens GN=NPEPPS PE=1 SV=1;sp|P55786|PSA_HUMAN Puromycin-sensitive aminopeptidase OS=Homo sapiens GN=NPEPPS PE=1 SV=2	102.99	0	147.21	3540600	6453800	5595500
E9PLT0;O75534	E9PLT0;O75534	Cold shock domain-containing protein E1	CSDE1	tr|E9PLT0|E9PLT0_HUMAN Cold shock domain-containing protein E1 OS=Homo sapiens GN=CSDE1 PE=1 SV=1;sp|O75534|CSDE1_HUMAN Cold shock domain-containing protein E1 OS=Homo sapiens GN=CSDE1 PE=1 SV=2	74583	0	18097	0	0	51945
E9PM75;Q9NTG7	E9PM75;Q9NTG7	NAD-dependent protein deacetylase sirtuin-3, mitochondrial	SIRT3	tr|E9PM75|E9PM75_HUMAN NAD-dependent protein deacetylase sirtuin-3, mitochondrial OS=Homo sapiens GN=SIRT3 PE=1 SV=1;sp|Q9NTG7|SIR3_HUMAN NAD-dependent protein deacetylase sirtuin-3, mitochondrial OS=Homo sapiens GN=SIRT3 PE=1 SV=2	37639	0	33952	0	0	22011
E9PMD7;P62136;F8W0W8;F8W0V8	E9PMD7;P62136;F8W0W8	Serine/threonine-protein phosphatase;Serine/threonine-protein phosphatase PP1-alpha catalytic subunit	PPP1CA;PPP1CC	tr|E9PMD7|E9PMD7_HUMAN Serine/threonine-protein phosphatase (Fragment) OS=Homo sapiens GN=PPP1CA PE=1 SV=1;sp|P62136|PP1A_HUMAN Serine/threonine-protein phosphatase PP1-alpha catalytic subunit OS=Homo sapiens GN=PPP1CA PE=1 SV=1;tr|F8W0W8|F8W0W8_HUMAN Seri	28898	0	59436	78912	241330	167180
E9PQW4;P27361;E9PJF0;B3KR49;E9PBK7;H0YDH9;H0YEX6;E9PRH7;K7ELV1;K7EN18;P31152;Q16659	E9PQW4;P27361;E9PJF0;B3KR49;E9PBK7	Mitogen-activated protein kinase;Mitogen-activated protein kinase 3	MAPK3	tr|E9PQW4|E9PQW4_HUMAN Mitogen-activated protein kinase OS=Homo sapiens GN=MAPK3 PE=1 SV=1;sp|P27361|MK03_HUMAN Mitogen-activated protein kinase 3 OS=Homo sapiens GN=MAPK3 PE=1 SV=4;tr|E9PJF0|E9PJF0_HUMAN Mitogen-activated protein kinase OS=Homo sapiens GN	38546	0	73861	207330	350320	231340
E9PR44;P02511;A0A024R3B9;E9PJL7;E9PNH7;E9PRA8;E9PS12;H0YCW8;E9PRS4	E9PR44;P02511;A0A024R3B9;E9PJL7;E9PNH7;E9PRA8	Alpha-crystallin B chain	CRYAB	tr|E9PR44|E9PR44_HUMAN Alpha-crystallin B chain (Fragment) OS=Homo sapiens GN=CRYAB PE=1 SV=1;sp|P02511|CRYAB_HUMAN Alpha-crystallin B chain OS=Homo sapiens GN=CRYAB PE=1 SV=2;tr|A0A024R3B9|A0A024R3B9_HUMAN Alpha-crystallin B chain OS=Homo sapiens GN=CRYAB	20.03	0	90706	59512000	43299000	64790000
H0YD26;I3L352;E9PR46;I3L0H8;J3QL17;F6QDS0;Q9NUU7;Q9UHL0	H0YD26;I3L352;E9PR46;I3L0H8;J3QL17;F6QDS0;Q9NUU7;Q9UHL0	ATP-dependent RNA helicase DDX19A;ATP-dependent RNA helicase DDX25	DDX25;DDX19A	tr|H0YD26|H0YD26_HUMAN ATP-dependent RNA helicase DDX25 (Fragment) OS=Homo sapiens GN=DDX25 PE=1 SV=2;tr|I3L352|I3L352_HUMAN ATP-dependent RNA helicase DDX19A (Fragment) OS=Homo sapiens GN=DDX19A PE=1 SV=1;tr|E9PR46|E9PR46_HUMAN ATP-dependent RNA helicase	21004	0.00089366	23592	0	0	31542
F2Z2X4;Q9C0E2	F2Z2X4;Q9C0E2	Exportin-4	XPO4	tr|F2Z2X4|F2Z2X4_HUMAN Exportin-4 OS=Homo sapiens GN=XPO4 PE=1 SV=1;sp|Q9C0E2|XPO4_HUMAN Exportin-4 OS=Homo sapiens GN=XPO4 PE=1 SV=2	130.15	0.0093313	13568	0	0	57799
F2Z393;P37837;E9PM01;E9PKI8	F2Z393;P37837	Transaldolase	TALDO1	tr|F2Z393|F2Z393_HUMAN Transaldolase OS=Homo sapiens GN=TALDO1 PE=1 SV=1;sp|P37837|TALDO_HUMAN Transaldolase OS=Homo sapiens GN=TALDO1 PE=1 SV=2	35328	0	24602	520860	1031400	1531400
F2Z3J9;Q14914	F2Z3J9;Q14914	Prostaglandin reductase 1	PTGR1	tr|F2Z3J9|F2Z3J9_HUMAN Prostaglandin reductase 1 (Fragment) OS=Homo sapiens GN=PTGR1 PE=1 SV=2;sp|Q14914|PTGR1_HUMAN Prostaglandin reductase 1 OS=Homo sapiens GN=PTGR1 PE=1 SV=2	13444	0	69971	0	218480	417710
H0YFI1;F5H479;F5GX19;F5H3Y3;Q6IAA8	H0YFI1;F5H479;F5GX19;F5H3Y3;Q6IAA8	Ragulator complex protein LAMTOR1	LAMTOR1	tr|H0YFI1|H0YFI1_HUMAN Ragulator complex protein LAMTOR1 (Fragment) OS=Homo sapiens GN=LAMTOR1 PE=1 SV=1;tr|F5H479|F5H479_HUMAN Ragulator complex protein LAMTOR1 OS=Homo sapiens GN=LAMTOR1 PE=1 SV=1;tr|F5GX19|F5GX19_HUMAN Ragulator complex protein LAMTOR1	85974	0	54393	0	0	22822
F5GX71;H3BPB8;P34949;H3BMZ9;H3BPP3;H3BP57;H3BT48;H3BUZ9	F5GX71;H3BPB8;P34949;H3BMZ9;H3BPP3;H3BP57;H3BT48;H3BUZ9	Mannose-6-phosphate isomerase	MPI	tr|F5GX71|F5GX71_HUMAN Mannose-6-phosphate isomerase OS=Homo sapiens GN=MPI PE=1 SV=1;tr|H3BPB8|H3BPB8_HUMAN Mannose-6-phosphate isomerase OS=Homo sapiens GN=MPI PE=1 SV=1;sp|P34949|MPI_HUMAN Mannose-6-phosphate isomerase OS=Homo sapiens GN=MPI PE=1 SV=2;t	41205	0	10978	0	128790	203170
F5H7C6;F5GYF7;F5H248;Q9UBW8;F5H4U8;F5H4Z0;F5H3M6;G3XAP1;F5GXT7	F5H7C6;F5GYF7;F5H248;Q9UBW8;F5H4U8	COP9 signalosome complex subunit 7a	COPS7A	tr|F5H7C6|F5H7C6_HUMAN COP9 signalosome complex subunit 7a (Fragment) OS=Homo sapiens GN=COPS7A PE=1 SV=1;tr|F5GYF7|F5GYF7_HUMAN COP9 signalosome complex subunit 7a (Fragment) OS=Homo sapiens GN=COPS7A PE=1 SV=7;tr|F5H248|F5H248_HUMAN COP9 signalosome comp	21306	0	32.9	0	251160	377600
F5GYN4;J3KR44;Q96FW1;F5H6Q1;F5GYJ8;F5H3F0	F5GYN4;J3KR44;Q96FW1;F5H6Q1;F5GYJ8;F5H3F0	Ubiquitin thioesterase OTUB1	OTUB1	tr|F5GYN4|F5GYN4_HUMAN Ubiquitin thioesterase OTUB1 OS=Homo sapiens GN=OTUB1 PE=1 SV=1;tr|J3KR44|J3KR44_HUMAN Ubiquitin thioesterase OTUB1 OS=Homo sapiens GN=OTUB1 PE=1 SV=2;sp|Q96FW1|OTUB1_HUMAN Ubiquitin thioesterase OTUB1 OS=Homo sapiens GN=OTUB1 PE=1 S	28.05	0	8308	228470	319850	1024100
F5GZN3;Q08431;X6R3G6;H0YKS8;A0A087WUV5	F5GZN3;Q08431;X6R3G6;H0YKS8	Lactadherin;Lactadherin short form;Medin	MFGE8	tr|F5GZN3|F5GZN3_HUMAN Lactadherin OS=Homo sapiens GN=MFGE8 PE=1 SV=1;sp|Q08431|MFGM_HUMAN Lactadherin OS=Homo sapiens GN=MFGE8 PE=1 SV=2;tr|X6R3G6|X6R3G6_HUMAN Lactadherin OS=Homo sapiens GN=MFGE8 PE=1 SV=1;tr|H0YKS8|H0YKS8_HUMAN Lactadherin (Fragment) OS	38343	0	11375	253480	181220	165120
H0YFX4;F5GZS6;J3KPF3;P08195	H0YFX4;F5GZS6;J3KPF3;P08195	4F2 cell-surface antigen heavy chain	SLC3A2	tr|H0YFX4|H0YFX4_HUMAN 4F2 cell-surface antigen heavy chain (Fragment) OS=Homo sapiens GN=SLC3A2 PE=1 SV=1;tr|F5GZS6|F5GZS6_HUMAN 4F2 cell-surface antigen heavy chain OS=Homo sapiens GN=SLC3A2 PE=1 SV=1;tr|J3KPF3|J3KPF3_HUMAN 4F2 cell-surface antigen heavy	13175	0.0086819	14104	0	6231.5	0
F5H081;I3L2R4;P14672	F5H081;I3L2R4;P14672	Solute carrier family 2, facilitated glucose transporter member 4	SLC2A4	tr|F5H081|F5H081_HUMAN Solute carrier family 2, facilitated glucose transporter member 4 OS=Homo sapiens GN=SLC2A4 PE=1 SV=1;tr|I3L2R4|I3L2R4_HUMAN Solute carrier family 2 (Facilitated glucose transporter), member 4, isoform CRA_b OS=Homo sapiens GN=SLC2A4	48016	0	25716	0	0	21919
F5H0D0;Q14232	F5H0D0;Q14232	Translation initiation factor eIF-2B subunit alpha	EIF2B1	tr|F5H0D0|F5H0D0_HUMAN Translation initiation factor eIF-2B subunit alpha OS=Homo sapiens GN=EIF2B1 PE=1 SV=1;sp|Q14232|EI2BA_HUMAN Translation initiation factor eIF-2B subunit alpha OS=Homo sapiens GN=EIF2B1 PE=1 SV=1	22287	0.0017316	21311	0	262220	206850
F5H2F4;P11586;V9GYY3	F5H2F4;P11586	C-1-tetrahydrofolate synthase, cytoplasmic;Methylenetetrahydrofolate dehydrogenase;Methenyltetrahydrofolate cyclohydrolase;Formyltetrahydrofolate synthetase;C-1-tetrahydrofolate synthase, cytoplasmic, N-terminally processed	MTHFD1	tr|F5H2F4|F5H2F4_HUMAN C-1-tetrahydrofolate synthase, cytoplasmic OS=Homo sapiens GN=MTHFD1 PE=1 SV=1;sp|P11586|C1TC_HUMAN C-1-tetrahydrofolate synthase, cytoplasmic OS=Homo sapiens GN=MTHFD1 PE=1 SV=3	110.61	0	61146	505010	852040	686090
F5H365;Q15436;G3V5X8;G3V4Q2;G3V4V1;G3V1W4;G3V3G5;G3V2R6;Q5QPE2;Q15437	F5H365;Q15436	Protein transport protein Sec23A	SEC23A	tr|F5H365|F5H365_HUMAN Protein transport protein Sec23A OS=Homo sapiens GN=SEC23A PE=1 SV=1;sp|Q15436|SC23A_HUMAN Protein transport protein Sec23A OS=Homo sapiens GN=SEC23A PE=1 SV=2	82968	0	11708	194250	169390	150450
F5H5D3;Q9BQE3;P68363;F8VVB9;C9JDS9;F8VRZ4;F8VS66;F8VX09;F8VWV9;F8VRK0;F8VXZ7;F8W0F6	F5H5D3;Q9BQE3;P68363;F8VVB9	Tubulin alpha-1C chain;Tubulin alpha-1B chain	TUBA1C;TUBA1B	tr|F5H5D3|F5H5D3_HUMAN Tubulin alpha-1C chain OS=Homo sapiens GN=TUBA1C PE=1 SV=1;sp|Q9BQE3|TBA1C_HUMAN Tubulin alpha-1C chain OS=Homo sapiens GN=TUBA1C PE=1 SV=1;sp|P68363|TBA1B_HUMAN Tubulin alpha-1B chain OS=Homo sapiens GN=TUBA1B PE=1 SV=1;tr|F8VVB9|F8	57.73	0	228.94	17499000	11624000	12150000
F5H6E2;O00159	F5H6E2;O00159	Unconventional myosin-Ic	MYO1C	tr|F5H6E2|F5H6E2_HUMAN Unconventional myosin-Ic OS=Homo sapiens GN=MYO1C PE=1 SV=1;sp|O00159|MYO1C_HUMAN Unconventional myosin-Ic OS=Homo sapiens GN=MYO1C PE=1 SV=4	118.99	0	40585	1287300	705370	659270
F5H6P7;P61326;Q96A72	F5H6P7;P61326;Q96A72	Protein mago nashi homolog;Protein mago nashi homolog 2	MAGOHB;MAGOH	tr|F5H6P7|F5H6P7_HUMAN Protein mago nashi homolog 2 OS=Homo sapiens GN=MAGOHB PE=4 SV=1;sp|P61326|MGN_HUMAN Protein mago nashi homolog OS=Homo sapiens GN=MAGOH PE=1 SV=1;sp|Q96A72|MGN2_HUMAN Protein mago nashi homolog 2 OS=Homo sapiens GN=MAGOHB PE=1 SV=1	11799	0	30957	0	0	260450
F5H6Y0;H3BMM5;Q96AX1	F5H6Y0;H3BMM5;Q96AX1	Vacuolar protein sorting-associated protein 33A	VPS33A	tr|F5H6Y0|F5H6Y0_HUMAN Vacuolar protein sorting-associated protein 33A OS=Homo sapiens GN=VPS33A PE=3 SV=1;tr|H3BMM5|H3BMM5_HUMAN Uncharacterized protein OS=Homo sapiens PE=3 SV=1;sp|Q96AX1|VP33A_HUMAN Vacuolar protein sorting-associated protein 33A OS=Hom	21226	0.0017182	21066	0	0	39581
F6RFD5;P60981	F6RFD5;P60981	Destrin	DSTN	tr|F6RFD5|F6RFD5_HUMAN Destrin OS=Homo sapiens GN=DSTN PE=1 SV=1;sp|P60981|DEST_HUMAN Destrin OS=Homo sapiens GN=DSTN PE=1 SV=3	15397	0	24534	0	794110	1563800
G3V2Q5;G3V5Y4;F6S9Y6;Q9NZ32;V9GYX7;G3V524;G3V4K6	G3V2Q5;G3V5Y4;F6S9Y6;Q9NZ32;V9GYX7	Actin-related protein 10	ACTR10	tr|G3V2Q5|G3V2Q5_HUMAN Actin-related protein 10 OS=Homo sapiens GN=ACTR10 PE=1 SV=1;tr|G3V5Y4|G3V5Y4_HUMAN Actin-related protein 10 OS=Homo sapiens GN=ACTR10 PE=1 SV=1;tr|F6S9Y6|F6S9Y6_HUMAN Actin-related protein 10 OS=Homo sapiens GN=ACTR10 PE=1 SV=1;sp|Q	14334	0	33.09	0	213910	152960
F6U211;S4R435;P46783	F6U211;S4R435;P46783	40S ribosomal protein S10	RPS10;RPS10-NUDT3	tr|F6U211|F6U211_HUMAN 40S ribosomal protein S10 OS=Homo sapiens GN=RPS10 PE=4 SV=1;tr|S4R435|S4R435_HUMAN Protein RPS10-NUDT3 (Fragment) OS=Homo sapiens GN=RPS10-NUDT3 PE=4 SV=1;sp|P46783|RS10_HUMAN 40S ribosomal protein S10 OS=Homo sapiens GN=RPS10 PE=1	19868	0	4255	0	53693	0
F6V107;Q9NRD5	F6V107;Q9NRD5	PRKCA-binding protein	PICK1	tr|F6V107|F6V107_HUMAN PRKCA-binding protein (Fragment) OS=Homo sapiens GN=PICK1 PE=1 SV=1;sp|Q9NRD5|PICK1_HUMAN PRKCA-binding protein OS=Homo sapiens GN=PICK1 PE=1 SV=2	25092	0	36501	0	0	23365
F6VCX5;Q16816	F6VCX5;Q16816	Phosphorylase b kinase gamma catalytic chain, skeletal muscle/heart isoform	PHKG1	tr|F6VCX5|F6VCX5_HUMAN Phosphorylase b kinase gamma catalytic chain, skeletal muscle/heart isoform OS=Homo sapiens GN=PHKG1 PE=1 SV=1;sp|Q16816|PHKG1_HUMAN Phosphorylase b kinase gamma catalytic chain, skeletal muscle/heart isoform OS=Homo sapiens GN=PHKG1	45464	0	10199	0	131560	105210
F6X2W2;Q7Z3B1	F6X2W2;Q7Z3B1	Neuronal growth regulator 1	NEGR1	tr|F6X2W2|F6X2W2_HUMAN Neuronal growth regulator 1 OS=Homo sapiens GN=NEGR1 PE=1 SV=1;sp|Q7Z3B1|NEGR1_HUMAN Neuronal growth regulator 1 OS=Homo sapiens GN=NEGR1 PE=1 SV=3	32.85	0	41308	0	0	111890
F8VNT9;F8VV56;F8W022;F8VWK8;P08962	F8VNT9;F8VV56;F8W022;F8VWK8;P08962	Tetraspanin;CD63 antigen	CD63	tr|F8VNT9|F8VNT9_HUMAN CD63 antigen (Fragment) OS=Homo sapiens GN=CD63 PE=1 SV=1;tr|F8VV56|F8VV56_HUMAN CD63 antigen OS=Homo sapiens GN=CD63 PE=1 SV=1;tr|F8W022|F8W022_HUMAN Tetraspanin (Fragment) OS=Homo sapiens GN=CD63 PE=1 SV=1;tr|F8VWK8|F8VWK8_HUMAN Te	14265	0	47456	0	0	134600
F8VUA7;F8VQX7;Q9BZF1	F8VUA7;F8VQX7;Q9BZF1	Oxysterol-binding protein;Oxysterol-binding protein-related protein 8	OSBPL8	tr|F8VUA7|F8VUA7_HUMAN Oxysterol-binding protein (Fragment) OS=Homo sapiens GN=OSBPL8 PE=1 SV=7;tr|F8VQX7|F8VQX7_HUMAN Oxysterol-binding protein (Fragment) OS=Homo sapiens GN=OSBPL8 PE=1 SV=1;sp|Q9BZF1|OSBL8_HUMAN Oxysterol-binding protein-related protein	79209	0.0079365	14501	0	14663	0
F8VTQ5;F8VZ49;F8W6I7;Q32P51;P09651;F8VYN5;F8W646;H0YH80	F8VTQ5;F8VZ49;F8W6I7;Q32P51;P09651;F8VYN5;F8W646;H0YH80	Heterogeneous nuclear ribonucleoprotein A1-like 2;Heterogeneous nuclear ribonucleoprotein A1;Heterogeneous nuclear ribonucleoprotein A1, N-terminally processed	HNRNPA1;HNRNPA1L2	tr|F8VTQ5|F8VTQ5_HUMAN Heterogeneous nuclear ribonucleoprotein A1 (Fragment) OS=Homo sapiens GN=HNRNPA1 PE=1 SV=1;tr|F8VZ49|F8VZ49_HUMAN Heterogeneous nuclear ribonucleoprotein A1 (Fragment) OS=Homo sapiens GN=HNRNPA1 PE=1 SV=1;tr|F8W6I7|F8W6I7_HUMAN Heter	16536	0	12435	0	95636	113330
F8VVM2;Q00325;F8VZL5;F8VWR4;F8VWQ0	F8VVM2;Q00325;F8VZL5;F8VWR4;F8VWQ0	Phosphate carrier protein, mitochondrial	SLC25A3	tr|F8VVM2|F8VVM2_HUMAN Phosphate carrier protein, mitochondrial OS=Homo sapiens GN=SLC25A3 PE=1 SV=1;sp|Q00325|MPCP_HUMAN Phosphate carrier protein, mitochondrial OS=Homo sapiens GN=SLC25A3 PE=1 SV=2;tr|F8VZL5|F8VZL5_HUMAN Phosphate carrier protein, mitoch	36161	0	10014	259280	205780	203290
F8VXU5;Q9UBQ0	F8VXU5;Q9UBQ0	Vacuolar protein sorting-associated protein 29	VPS29	tr|F8VXU5|F8VXU5_HUMAN Vacuolar protein sorting-associated protein 29 OS=Homo sapiens GN=VPS29 PE=1 SV=1;sp|Q9UBQ0|VPS29_HUMAN Vacuolar protein sorting-associated protein 29 OS=Homo sapiens GN=VPS29 PE=1 SV=1	23.98	0	94868	0	1646700	2348600
F8VYE8;P36873;A0A087WYY5;F8VR82	F8VYE8;P36873;A0A087WYY5;F8VR82	Serine/threonine-protein phosphatase;Serine/threonine-protein phosphatase PP1-gamma catalytic subunit	PPP1CC	tr|F8VYE8|F8VYE8_HUMAN Serine/threonine-protein phosphatase OS=Homo sapiens GN=PPP1CC PE=1 SV=1;sp|P36873|PP1G_HUMAN Serine/threonine-protein phosphatase PP1-gamma catalytic subunit OS=Homo sapiens GN=PPP1CC PE=1 SV=1;tr|A0A087WYY5|A0A087WYY5_HUMAN Serine/	34.95	0	14533	0	0	146760
F8VYN9;P40616;F8VP99;F8VP63	F8VYN9;P40616;F8VP99;F8VP63	ADP-ribosylation factor-like protein 1	ARL1	tr|F8VYN9|F8VYN9_HUMAN ADP-ribosylation factor-like protein 1 OS=Homo sapiens GN=ARL1 PE=1 SV=1;sp|P40616|ARL1_HUMAN ADP-ribosylation factor-like protein 1 OS=Homo sapiens GN=ARL1 PE=1 SV=1;tr|F8VP99|F8VP99_HUMAN ADP-ribosylation factor-like protein 1 (Fra	21778	0	4756	0	28994	79271
F8VZV1;Q7Z3U7	F8VZV1;Q7Z3U7	Protein MON2 homolog	MON2	tr|F8VZV1|F8VZV1_HUMAN Protein MON2 homolog OS=Homo sapiens GN=MON2 PE=1 SV=1;sp|Q7Z3U7|MON2_HUMAN Protein MON2 homolog OS=Homo sapiens GN=MON2 PE=1 SV=3	117.96	0.0017007	19771	0	0	12054
H0YHL1;F8W1I6;Q13561	H0YHL1;F8W1I6;Q13561	Dynactin subunit 2	DCTN2	tr|H0YHL1|H0YHL1_HUMAN Dynactin subunit 2 (Fragment) OS=Homo sapiens GN=DCTN2 PE=1 SV=1;tr|F8W1I6|F8W1I6_HUMAN Dynactin subunit 2 OS=Homo sapiens GN=DCTN2 PE=1 SV=1;sp|Q13561|DCTN2_HUMAN Dynactin subunit 2 OS=Homo sapiens GN=DCTN2 PE=1 SV=4	14207	0	42524	0	65939	0
F8W717;O00423;H0YJK4;H0YJY3;G3V500;G3V3N9	F8W717;O00423	Echinoderm microtubule-associated protein-like 1	EML1	tr|F8W717|F8W717_HUMAN Echinoderm microtubule-associated protein-like 1 OS=Homo sapiens GN=EML1 PE=1 SV=1;sp|O00423|EMAL1_HUMAN Echinoderm microtubule-associated protein-like 1 OS=Homo sapiens GN=EML1 PE=1 SV=3	88716	0	34152	268830	513390	565640
F8W733;Q9NXR7;C9J2G0	F8W733;Q9NXR7;C9J2G0	BRCA1-A complex subunit BRE	BRE	tr|F8W733|F8W733_HUMAN BRCA1-A complex subunit BRE (Fragment) OS=Homo sapiens GN=BRE PE=1 SV=1;sp|Q9NXR7|BRE_HUMAN BRCA1-A complex subunit BRE OS=Homo sapiens GN=BRE PE=1 SV=2;tr|C9J2G0|C9J2G0_HUMAN BRCA1-A complex subunit BRE (Fragment) OS=Homo sapiens GN	31972	0	11.31	0	54532	79304
F8W914;Q9NQC3;H7C106	F8W914;Q9NQC3;H7C106	Reticulon;Reticulon-4	RTN4	tr|F8W914|F8W914_HUMAN Reticulon OS=Homo sapiens GN=RTN4 PE=1 SV=1;sp|Q9NQC3|RTN4_HUMAN Reticulon-4 OS=Homo sapiens GN=RTN4 PE=1 SV=2;tr|H7C106|H7C106_HUMAN Reticulon (Fragment) OS=Homo sapiens GN=RTN4 PE=1 SV=1	37144	0.0009009	24374	510460	90763	111270
F8WCF6;P59998;R4GN08;F8WDD7;H7C0A3;A0A0A6YYG9	F8WCF6;P59998;R4GN08;F8WDD7;H7C0A3;A0A0A6YYG9	Actin-related protein 2/3 complex subunit 4	ARPC4-TTLL3;ARPC4	tr|F8WCF6|F8WCF6_HUMAN Actin-related protein 2/3 complex subunit 4 OS=Homo sapiens GN=ARPC4-TTLL3 PE=3 SV=1;sp|P59998|ARPC4_HUMAN Actin-related protein 2/3 complex subunit 4 OS=Homo sapiens GN=ARPC4 PE=1 SV=3;tr|R4GN08|R4GN08_HUMAN Actin-related protein 2/	21058	0	33214	667120	2210300	3433000
F8WDM4;F8WF57;C9JR33;C9J3U7;F8WCF4;C9JZQ0;B5MCS1;A0A0A0MRF5;E7EWX6;A0A087WYM3;Q8IXJ6	F8WDM4;F8WF57;C9JR33;C9J3U7;F8WCF4;C9JZQ0;B5MCS1;A0A0A0MRF5;E7EWX6;A0A087WYM3;Q8IXJ6	NAD-dependent protein deacetylase sirtuin-2	SIRT2	tr|F8WDM4|F8WDM4_HUMAN NAD-dependent protein deacetylase sirtuin-2 OS=Homo sapiens GN=SIRT2 PE=1 SV=1;tr|F8WF57|F8WF57_HUMAN NAD-dependent protein deacetylase sirtuin-2 OS=Homo sapiens GN=SIRT2 PE=1 SV=1;tr|C9JR33|C9JR33_HUMAN NAD-dependent protein deacety	59097	0	40913	0	25312	0
F8WF32;P04843	F8WF32;P04843	Dolichyl-diphosphooligosaccharide--protein glycosyltransferase subunit 1	RPN1	tr|F8WF32|F8WF32_HUMAN Dolichyl-diphosphooligosaccharide--protein glycosyltransferase subunit 1 OS=Homo sapiens GN=RPN1 PE=1 SV=1;sp|P04843|RPN1_HUMAN Dolichyl-diphosphooligosaccharide--protein glycosyltransferase subunit 1 OS=Homo sapiens GN=RPN1 PE=1 SV=	12695	0.00087336	21897	0	0	11199
G3V0I5;P49821;B4DE93;E9PQP1;E9PMX3;E9PJL9;E9PLC6;E9PPR0;E9PPS5;H0YD04;H0YE81	G3V0I5;P49821;B4DE93;E9PQP1;E9PMX3	NADH dehydrogenase [ubiquinone] flavoprotein 1, mitochondrial	NDUFV1	tr|G3V0I5|G3V0I5_HUMAN NADH dehydrogenase (Ubiquinone) flavoprotein 1, 51kDa, isoform CRA_c OS=Homo sapiens GN=NDUFV1 PE=1 SV=1;sp|P49821|NDUV1_HUMAN NADH dehydrogenase [ubiquinone] flavoprotein 1, mitochondrial OS=Homo sapiens GN=NDUFV1 PE=1 SV=4;tr|B4DE9	50054	0	46178	1160500	1096600	507010
G3V126;Q9UI12	G3V126;Q9UI12	V-type proton ATPase subunit H	ATP6V1H	tr|G3V126|G3V126_HUMAN ATPase, H+ transporting, lysosomal 50/57kDa, V1 subunit H, isoform CRA_c OS=Homo sapiens GN=ATP6V1H PE=1 SV=1;sp|Q9UI12|VATH_HUMAN V-type proton ATPase subunit H OS=Homo sapiens GN=ATP6V1H PE=1 SV=1	51.57	0	62668	0	124960	191180
G3V192;P02794;E9PPQ4;E9PRK8;G3V1D1;E9PKY7	G3V192;P02794;E9PPQ4;E9PRK8;G3V1D1	Ferritin;Ferritin heavy chain;Ferritin heavy chain, N-terminally processed	FTH1	tr|G3V192|G3V192_HUMAN Ferritin OS=Homo sapiens GN=FTH1 PE=1 SV=1;sp|P02794|FRIH_HUMAN Ferritin heavy chain OS=Homo sapiens GN=FTH1 PE=1 SV=2;tr|E9PPQ4|E9PPQ4_HUMAN Ferritin (Fragment) OS=Homo sapiens GN=FTH1 PE=1 SV=1;tr|E9PRK8|E9PRK8_HUMAN Ferritin OS=Ho	17653	0	78483	831920	685490	844610
G3V1Y8;Q86U10;H0YHD3	G3V1Y8;Q86U10;H0YHD3	60 kDa lysophospholipase;L-asparaginase;Platelet-activating factor acetylhydrolase	ASPG	tr|G3V1Y8|G3V1Y8_HUMAN 60 kDa lysophospholipase OS=Homo sapiens GN=ASPG PE=1 SV=1;sp|Q86U10|LPP60_HUMAN 60 kDa lysophospholipase OS=Homo sapiens GN=ASPG PE=2 SV=3;tr|H0YHD3|H0YHD3_HUMAN 60 kDa lysophospholipase (Fragment) OS=Homo sapiens GN=ASPG PE=1 SV=1	59882	0	17585	0	27196	71360
G3V203;H0YHA7;J3QQ67;Q07020;F8VUA6;F8VYV2;A0A075B7A0	G3V203;H0YHA7;J3QQ67;Q07020;F8VUA6;F8VYV2;A0A075B7A0	60S ribosomal protein L18	RPL18	tr|G3V203|G3V203_HUMAN 60S ribosomal protein L18 OS=Homo sapiens GN=RPL18 PE=1 SV=1;tr|H0YHA7|H0YHA7_HUMAN 60S ribosomal protein L18 (Fragment) OS=Homo sapiens GN=RPL18 PE=1 SV=1;tr|J3QQ67|J3QQ67_HUMAN 60S ribosomal protein L18 (Fragment) OS=Homo sapiens G	18756	0	73921	3226500	1422800	1018400
G3V2I4;G3V2C6;J3KNV4;Q13683	G3V2I4;G3V2C6;J3KNV4;Q13683	Integrin alpha-7;Integrin alpha-7 heavy chain;Integrin alpha-7 light chain;Integrin alpha-7 70 kDa form	ITGA7	tr|G3V2I4|G3V2I4_HUMAN Integrin alpha-7 OS=Homo sapiens GN=ITGA7 PE=1 SV=1;tr|G3V2C6|G3V2C6_HUMAN Integrin alpha-7 (Fragment) OS=Homo sapiens GN=ITGA7 PE=1 SV=1;tr|J3KNV4|J3KNV4_HUMAN Integrin alpha-7 OS=Homo sapiens GN=ITGA7 PE=1 SV=1;sp|Q13683|ITA7_HUMAN	10478	0	3865	0	0	103790
H0YJN9;G3V2T4;G3V4E4;Q99538	H0YJN9;G3V2T4;G3V4E4;Q99538	Legumain	LGMN	tr|H0YJN9|H0YJN9_HUMAN Legumain (Fragment) OS=Homo sapiens GN=LGMN PE=1 SV=1;tr|G3V2T4|G3V2T4_HUMAN Legumain (Fragment) OS=Homo sapiens GN=LGMN PE=1 SV=1;tr|G3V4E4|G3V4E4_HUMAN Legumain OS=Homo sapiens GN=LGMN PE=1 SV=1;sp|Q99538|LGMN_HUMAN Legumain OS=Hom	9658	0.00489	15844	0	17559	0
G3V3A0;P01011	G3V3A0;P01011	Alpha-1-antichymotrypsin;Alpha-1-antichymotrypsin His-Pro-less	SERPINA3	tr|G3V3A0|G3V3A0_HUMAN Alpha-1-antichymotrypsin OS=Homo sapiens GN=SERPINA3 PE=1 SV=1;sp|P01011|AACT_HUMAN Alpha-1-antichymotrypsin OS=Homo sapiens GN=SERPINA3 PE=1 SV=2	23406	0	55034	208530	226910	86163
G3V4S6;G3V433;G3V3M5;G3V3R1;P49757	G3V4S6;G3V433;G3V3M5;G3V3R1;P49757	Protein numb homolog	NUMB	tr|G3V4S6|G3V4S6_HUMAN Protein numb homolog (Fragment) OS=Homo sapiens GN=NUMB PE=1 SV=1;tr|G3V433|G3V433_HUMAN Protein numb homolog (Fragment) OS=Homo sapiens GN=NUMB PE=1 SV=1;tr|G3V3M5|G3V3M5_HUMAN Protein numb homolog (Fragment) OS=Homo sapiens GN=NUMB	78589	0.002453	16063	0	0	70395
G3V3R6;P17931	G3V3R6;P17931	Galectin;Galectin-3	LGALS3	tr|G3V3R6|G3V3R6_HUMAN Galectin OS=Homo sapiens GN=LGALS3 PE=1 SV=1;sp|P17931|LEG3_HUMAN Galectin-3 OS=Homo sapiens GN=LGALS3 PE=1 SV=5	24086	0.0093095	13407	904350	0	0
G3V3Y1;Q8N8N7;G3V2R9	G3V3Y1;Q8N8N7	Prostaglandin reductase 2	PTGR2	tr|G3V3Y1|G3V3Y1_HUMAN Uncharacterized protein OS=Homo sapiens PE=4 SV=1;sp|Q8N8N7|PTGR2_HUMAN Prostaglandin reductase 2 OS=Homo sapiens GN=PTGR2 PE=1 SV=1	31743	0	25026	0	441810	623050
H0YJ63;G3V438;H0YJG7;O95433	H0YJ63;G3V438;H0YJG7;O95433	Activator of 90 kDa heat shock protein ATPase homolog 1	AHSA1	tr|H0YJ63|H0YJ63_HUMAN Activator of 90 kDa heat shock protein ATPase homolog 1 (Fragment) OS=Homo sapiens GN=AHSA1 PE=1 SV=1;tr|G3V438|G3V438_HUMAN Activator of 90 kDa heat shock protein ATPase homolog 1 (Fragment) OS=Homo sapiens GN=AHSA1 PE=1 SV=1;tr|H0Y	10031	0.0025105	1.82	0	0	49764
G3V4S9;Q9UN36;G3V271;G3V5B7;G3V383;G3V5S0;G3V392;G3V5G0;G3V2I9;G3V5H8;A0A0A0MS87;G3V5B5;G3V239;G3V5P9;G3V5D7;G3V2S0;G3V3C3;G3V2Y3;G3V5G7;A0A0U1RVK7;G3V552;G3V3X3;G3V3P6;H0YJ56;G3V4T9;G3V2T2;G3V5A6;G3V280;G3V3P1;G3V5V9;G3V3D5;G3V3X2;G3V285;G3V4S2;G3V358;G3V5L7;A0A0U1RR50;G3V578;H0YJT9;G3V4X3;G3V420;G3V237;G3V3L1;G3V2A6;H7C0X0	G3V4S9;Q9UN36;G3V271;G3V5B7;G3V383;G3V5S0;G3V392;G3V5G0;G3V2I9;G3V5H8;A0A0A0MS87;G3V5B5;G3V239;G3V5P9;G3V5D7;G3V2S0;G3V3C3;G3V2Y3;G3V5G7;A0A0U1RVK7;G3V552;G3V3X3;G3V3P6;H0YJ56;G3V4T9;G3V2T2;G3V5A6;G3V280;G3V3P1;G3V5V9;G3V3D5;G3V3X2;G3V285;G3V4S2;G3V358;G3V5L7;A0A0U1RR50;G3V578;H0YJT9	Protein NDRG2	NDRG2	tr|G3V4S9|G3V4S9_HUMAN Protein NDRG2 (Fragment) OS=Homo sapiens GN=NDRG2 PE=1 SV=7;sp|Q9UN36|NDRG2_HUMAN Protein NDRG2 OS=Homo sapiens GN=NDRG2 PE=1 SV=2;tr|G3V271|G3V271_HUMAN Protein NDRG2 (Fragment) OS=Homo sapiens GN=NDRG2 PE=1 SV=1;tr|G3V5B7|G3V5B7_HU	33479	0	13.82	279690	387660	380970
H0YJS4;G3V4T5;P05198	H0YJS4;G3V4T5;P05198	Eukaryotic translation initiation factor 2 subunit 1	EIF2S1	tr|H0YJS4|H0YJS4_HUMAN Eukaryotic translation initiation factor 2 subunit 1 (Fragment) OS=Homo sapiens GN=EIF2S1 PE=1 SV=1;tr|G3V4T5|G3V4T5_HUMAN Eukaryotic translation initiation factor 2 subunit 1 (Fragment) OS=Homo sapiens GN=EIF2S1 PE=1 SV=1;sp|P05198|	28865	0	13615	0	245050	350630
G3XAN0;P60866	G3XAN0;P60866	40S ribosomal protein S20	RPS20	tr|G3XAN0|G3XAN0_HUMAN 40S ribosomal protein S20 OS=Homo sapiens GN=RPS20 PE=1 SV=1;sp|P60866|RS20_HUMAN 40S ribosomal protein S20 OS=Homo sapiens GN=RPS20 PE=1 SV=1	72473	0.0025359	19254	189070	0	0
G5E977;Q6XQN6;C9J8U2;H0YF31;A0A087WUT5;H0YDA6	G5E977;Q6XQN6;C9J8U2	Nicotinate phosphoribosyltransferase	NAPRT	tr|G5E977|G5E977_HUMAN Nicotinate phosphoribosyltransferase OS=Homo sapiens GN=NAPRT PE=1 SV=1;sp|Q6XQN6|PNCB_HUMAN Nicotinate phosphoribosyltransferase OS=Homo sapiens GN=NAPRT PE=1 SV=2;tr|C9J8U2|C9J8U2_HUMAN Nicotinate phosphoribosyltransferase OS=Homo	62171	0	53303	224290	641420	238030
G5EA09;O00560;B4DHN5;E9PBU7	G5EA09;O00560;B4DHN5;E9PBU7	Syntenin-1	SDCBP	tr|G5EA09|G5EA09_HUMAN Syndecan binding protein (Syntenin), isoform CRA_a OS=Homo sapiens GN=SDCBP PE=1 SV=1;sp|O00560|SDCB1_HUMAN Syntenin-1 OS=Homo sapiens GN=SDCBP PE=1 SV=1;tr|B4DHN5|B4DHN5_HUMAN Syntenin-1 OS=Homo sapiens GN=SDCBP PE=1 SV=1;tr|E9PBU7|	34819	0	71482	0	155060	132590
G5EA31;P53992	G5EA31;P53992	Protein transport protein Sec24C	SEC24C	tr|G5EA31|G5EA31_HUMAN Protein transport protein Sec24C OS=Homo sapiens GN=SEC24C PE=1 SV=1;sp|P53992|SC24C_HUMAN Protein transport protein Sec24C OS=Homo sapiens GN=SEC24C PE=1 SV=3	111.98	0	11743	0	132510	219630
G5EA37;K7EK57;Q5MNZ9	G5EA37;K7EK57;Q5MNZ9	WD repeat domain phosphoinositide-interacting protein 1	WIPI1	tr|G5EA37|G5EA37_HUMAN WD repeat domain phosphoinositide-interacting protein 1 OS=Homo sapiens GN=WIPI1 PE=1 SV=1;tr|K7EK57|K7EK57_HUMAN WD repeat domain phosphoinositide-interacting protein 1 OS=Homo sapiens GN=WIPI1 PE=1 SV=1;sp|Q5MNZ9|WIPI1_HUMAN WD rep	39942	0.0025338	19246	0	0	155690
G8JLD5;O00429;F8VZ52;B4DPZ9;F8VUJ9;F8W1W3;B4DDQ3;H0YHY4;F8VR28;F8VYL3	G8JLD5;O00429	Dynamin-1-like protein	DNM1L	tr|G8JLD5|G8JLD5_HUMAN Dynamin-1-like protein OS=Homo sapiens GN=DNM1L PE=1 SV=1;sp|O00429|DNM1L_HUMAN Dynamin-1-like protein OS=Homo sapiens GN=DNM1L PE=1 SV=2	79621	0	109.81	219770	1663800	1891700
H0Y3C5;J3KPD6;J3QRU1;P07948;P08631;P12931;P06241;P07947	H0Y3C5;J3KPD6;J3QRU1;P07948;P08631;P12931;P06241;P07947	Non-specific protein-tyrosine kinase;Tyrosine-protein kinase Lyn;Tyrosine-protein kinase HCK;Proto-oncogene tyrosine-protein kinase Src;Tyrosine-protein kinase Fyn;Tyrosine-protein kinase Yes	HCK;YES1;LYN;SRC;FYN	tr|H0Y3C5|H0Y3C5_HUMAN Tyrosine-protein kinase OS=Homo sapiens GN=HCK PE=1 SV=1;tr|J3KPD6|J3KPD6_HUMAN Tyrosine-protein kinase OS=Homo sapiens GN=HCK PE=1 SV=1;tr|J3QRU1|J3QRU1_HUMAN Tyrosine-protein kinase OS=Homo sapiens GN=YES1 PE=1 SV=1;sp|P07948|LYN_H	59.51	0.0016992	1974	0	0	67630
I3L4M2;I3L398;H0Y3Z3;H7BZ94;P07237;I3NI03;I3L312	I3L4M2;I3L398;H0Y3Z3;H7BZ94;P07237;I3NI03;I3L312	Protein disulfide-isomerase	P4HB	tr|I3L4M2|I3L4M2_HUMAN Protein disulfide-isomerase (Fragment) OS=Homo sapiens GN=P4HB PE=1 SV=1;tr|I3L398|I3L398_HUMAN Protein disulfide-isomerase (Fragment) OS=Homo sapiens GN=P4HB PE=1 SV=1;tr|H0Y3Z3|H0Y3Z3_HUMAN Protein disulfide-isomerase (Fragment) OS	13.49	0	32965	66867	55357	31185
H0Y5R6;P06132;Q5T446	H0Y5R6;P06132	Uroporphyrinogen decarboxylase	UROD	tr|H0Y5R6|H0Y5R6_HUMAN Uroporphyrinogen decarboxylase (Fragment) OS=Homo sapiens GN=UROD PE=1 SV=1;sp|P06132|DCUP_HUMAN Uroporphyrinogen decarboxylase OS=Homo sapiens GN=UROD PE=1 SV=2	25314	0	71273	0	170970	220220
H0Y5U0;Q5JTW6;P05165	H0Y5U0;Q5JTW6;P05165	Propionyl-CoA carboxylase alpha chain, mitochondrial	PCCA	tr|H0Y5U0|H0Y5U0_HUMAN Propionyl-CoA carboxylase alpha chain, mitochondrial (Fragment) OS=Homo sapiens GN=PCCA PE=1 SV=1;tr|Q5JTW6|Q5JTW6_HUMAN Propionyl-CoA carboxylase alpha chain, mitochondrial (Fragment) OS=Homo sapiens GN=PCCA PE=1 SV=1;sp|P05165|PCCA	15612	0	41995	0	193740	32607
H0Y6T8;Q9NP72	H0Y6T8;Q9NP72	Ras-related protein Rab-18	RAB18	tr|H0Y6T8|H0Y6T8_HUMAN Ras-related protein Rab-18 (Fragment) OS=Homo sapiens GN=RAB18 PE=1 SV=1;sp|Q9NP72|RAB18_HUMAN Ras-related protein Rab-18 OS=Homo sapiens GN=RAB18 PE=1 SV=1	32864	0	25478	0	0	13989
H0Y8C6;O00410;C9JMV5;E7ETV3;E7EQT5;E7EV12;H0Y3V4;C9JZ53;E7EWK4;E7EX05;C9JZD8;C9J875;C9JQT6;E7ESA1;E7ESZ1;E7ETV8	H0Y8C6;O00410	Importin-5	IPO5	tr|H0Y8C6|H0Y8C6_HUMAN Importin-5 (Fragment) OS=Homo sapiens GN=IPO5 PE=1 SV=1;sp|O00410|IPO5_HUMAN Importin-5 OS=Homo sapiens GN=IPO5 PE=1 SV=4	123.75	0	129.94	347020	1399300	2371200
H0Y9D8;D6R967;Q9H2U2	H0Y9D8;D6R967;Q9H2U2	Inorganic pyrophosphatase 2, mitochondrial	PPA2	tr|H0Y9D8|H0Y9D8_HUMAN Inorganic pyrophosphatase 2, mitochondrial (Fragment) OS=Homo sapiens GN=PPA2 PE=1 SV=1;tr|D6R967|D6R967_HUMAN Inorganic pyrophosphatase 2, mitochondrial (Fragment) OS=Homo sapiens GN=PPA2 PE=1 SV=1;sp|Q9H2U2|IPYR2_HUMAN Inorganic py	25524	0.00087796	22232	0	332320	332700
H0YB44;H0YC06;Q96N64	H0YB44;H0YC06;Q96N64	PWWP domain-containing protein 2A	PWWP2A	tr|H0YB44|H0YB44_HUMAN PWWP domain-containing protein 2A (Fragment) OS=Homo sapiens GN=PWWP2A PE=4 SV=1;tr|H0YC06|H0YC06_HUMAN PWWP domain-containing protein 2A (Fragment) OS=Homo sapiens GN=PWWP2A PE=1 SV=1;sp|Q96N64|PWP2A_HUMAN PWWP domain-containing pro	37852	0.00090334	24611	0	960600	0
H0YBA4;Q96J02;Q9H0M0	H0YBA4;Q96J02;Q9H0M0	E3 ubiquitin-protein ligase Itchy homolog;NEDD4-like E3 ubiquitin-protein ligase WWP1	WWP1;ITCH	tr|H0YBA4|H0YBA4_HUMAN NEDD4-like E3 ubiquitin-protein ligase WWP1 (Fragment) OS=Homo sapiens GN=WWP1 PE=1 SV=7;sp|Q96J02|ITCH_HUMAN E3 ubiquitin-protein ligase Itchy homolog OS=Homo sapiens GN=ITCH PE=1 SV=2;sp|Q9H0M0|WWP1_HUMAN NEDD4-like E3 ubiquitin-pr	27145	0.0024876	17122	0	0	13619
H0YC04;P21281;C9J5E3;C9JNS9;C9JL73;P15313	H0YC04;P21281;C9J5E3;C9JNS9;C9JL73;P15313	V-type proton ATPase subunit B, brain isoform;V-type proton ATPase subunit B, kidney isoform	ATP6V1B2;ATP6V1B1	tr|H0YC04|H0YC04_HUMAN V-type proton ATPase subunit B, brain isoform (Fragment) OS=Homo sapiens GN=ATP6V1B2 PE=1 SV=1;sp|P21281|VATB2_HUMAN V-type proton ATPase subunit B, brain isoform OS=Homo sapiens GN=ATP6V1B2 PE=1 SV=3;tr|C9J5E3|C9J5E3_HUMAN V-type pr	21003	0	14075	124120	137600	240850
H0YCB7;H0YEE1;Q9UID3	H0YCB7;H0YEE1;Q9UID3	Vacuolar protein sorting-associated protein 51 homolog	VPS51	tr|H0YCB7|H0YCB7_HUMAN Vacuolar protein sorting-associated protein 51 homolog (Fragment) OS=Homo sapiens GN=VPS51 PE=1 SV=1;tr|H0YEE1|H0YEE1_HUMAN Vacuolar protein sorting-associated protein 51 homolog (Fragment) OS=Homo sapiens GN=VPS51 PE=1 SV=1;sp|Q9UID	11169	0.0056497	15319	0	0	48934
H0YCU9;Q01995	H0YCU9;Q01995	Transgelin	TAGLN	tr|H0YCU9|H0YCU9_HUMAN Transgelin (Fragment) OS=Homo sapiens GN=TAGLN PE=1 SV=1;sp|Q01995|TAGL_HUMAN Transgelin OS=Homo sapiens GN=TAGLN PE=1 SV=4	16733	0	56479	0	0	86456
H0YDU8;P53041;A8MU39	H0YDU8;P53041;A8MU39	Serine/threonine-protein phosphatase;Serine/threonine-protein phosphatase 5	PPP5C	tr|H0YDU8|H0YDU8_HUMAN Serine/threonine-protein phosphatase (Fragment) OS=Homo sapiens GN=PPP5C PE=1 SV=1;sp|P53041|PPP5_HUMAN Serine/threonine-protein phosphatase 5 OS=Homo sapiens GN=PPP5C PE=1 SV=1;tr|A8MU39|A8MU39_HUMAN Serine/threonine-protein phospha	55096	0	18697	67976	242170	158920
H0YEN0;Q9NPQ8;E9PSI0	H0YEN0;Q9NPQ8	Synembryn-A	RIC8A	tr|H0YEN0|H0YEN0_HUMAN Synembryn-A (Fragment) OS=Homo sapiens GN=RIC8A PE=1 SV=7;sp|Q9NPQ8|RIC8A_HUMAN Synembryn-A OS=Homo sapiens GN=RIC8A PE=1 SV=3	32451	0	91207	0	47369	61229
H0YF29;Q6P1X6	H0YF29;Q6P1X6	UPF0598 protein C8orf82	C8orf82	tr|H0YF29|H0YF29_HUMAN UPF0598 protein C8orf82 (Fragment) OS=Homo sapiens GN=C8orf82 PE=1 SV=1;sp|Q6P1X6|CH082_HUMAN UPF0598 protein C8orf82 OS=Homo sapiens GN=C8orf82 PE=1 SV=2	28487	0	11723	0	52150	28135
H0YFA4;P52943	H0YFA4;P52943	Cysteine-rich protein 2	CRIP2	tr|H0YFA4|H0YFA4_HUMAN Cysteine-rich protein 2 (Fragment) OS=Homo sapiens GN=CRIP2 PE=1 SV=1;sp|P52943|CRIP2_HUMAN Cysteine-rich protein 2 OS=Homo sapiens GN=CRIP2 PE=1 SV=1	20.6	0	12.32	0	0	225380
H0YGW7;Q8NE71	H0YGW7;Q8NE71	ATP-binding cassette sub-family F member 1	ABCF1	tr|H0YGW7|H0YGW7_HUMAN ATP-binding cassette sub-family F member 1 (Fragment) OS=Homo sapiens GN=ABCF1 PE=1 SV=1;sp|Q8NE71|ABCF1_HUMAN ATP-binding cassette sub-family F member 1 OS=Homo sapiens GN=ABCF1 PE=1 SV=2	67.55	0.0017227	21108	0	0	9170.3
H0YHR8;Q5JUV3;Q5JUV4;P49902	H0YHR8;Q5JUV3;Q5JUV4;P49902	Cytosolic purine 5-nucleotidase	NT5C2	tr|H0YHR8|H0YHR8_HUMAN Cytosolic purine 5-nucleotidase (Fragment) OS=Homo sapiens GN=NT5C2 PE=1 SV=1;tr|Q5JUV3|Q5JUV3_HUMAN Cytosolic purine 5-nucleotidase (Fragment) OS=Homo sapiens GN=NT5C2 PE=1 SV=1;tr|Q5JUV4|Q5JUV4_HUMAN Cytosolic purine 5-nucleotid	17728	0	54393	0	0	16487
H0YJ34;Q96AC1;A0A0U1RRM8;H0YJB6;G3V5R2;G3V281;G3V3J0;G3V1L6;Q9BQL6	H0YJ34;Q96AC1;A0A0U1RRM8	Fermitin family homolog 2	FERMT2	tr|H0YJ34|H0YJ34_HUMAN Fermitin family homolog 2 (Fragment) OS=Homo sapiens GN=FERMT2 PE=1 SV=1;sp|Q96AC1|FERM2_HUMAN Fermitin family homolog 2 OS=Homo sapiens GN=FERMT2 PE=1 SV=1;tr|A0A0U1RRM8|A0A0U1RRM8_HUMAN Fermitin family homolog 2 (Fragment) OS=Homo	73352	0	104.85	1576700	2515000	3877600
H0YJI8;Q07954	H0YJI8;Q07954	Prolow-density lipoprotein receptor-related protein 1;Low-density lipoprotein receptor-related protein 1 85 kDa subunit;Low-density lipoprotein receptor-related protein 1 515 kDa subunit;Low-density lipoprotein receptor-related protein 1 intracellular domain	LRP1	tr|H0YJI8|H0YJI8_HUMAN Prolow-density lipoprotein receptor-related protein 1 (Fragment) OS=Homo sapiens GN=LRP1 PE=1 SV=1;sp|Q07954|LRP1_HUMAN Prolow-density lipoprotein receptor-related protein 1 OS=Homo sapiens GN=LRP1 PE=1 SV=2	15373	0	27449	0	0	16399
H0YK36;J3KPT0;Q6V1X1	H0YK36;J3KPT0;Q6V1X1	Dipeptidyl peptidase 8	DPP8	tr|H0YK36|H0YK36_HUMAN Dipeptidyl peptidase 8 (Fragment) OS=Homo sapiens GN=DPP8 PE=1 SV=2;tr|J3KPT0|J3KPT0_HUMAN Dipeptidyl peptidase 8 OS=Homo sapiens GN=DPP8 PE=1 SV=1;sp|Q6V1X1|DPP8_HUMAN Dipeptidyl peptidase 8 OS=Homo sapiens GN=DPP8 PE=1 SV=1	41085	0	42136	0	0	36970
H0YKK6;Q06323	H0YKK6;Q06323	Proteasome activator complex subunit 1	PSME1	tr|H0YKK6|H0YKK6_HUMAN Proteasome activator complex subunit 1 OS=Homo sapiens GN=PSME1 PE=1 SV=1;sp|Q06323|PSME1_HUMAN Proteasome activator complex subunit 1 OS=Homo sapiens GN=PSME1 PE=1 SV=1	10576	0	51621	0	0	14942
H0YLA1;H3BQA8;H0YL19;H0YN81;Q9GZS3	H0YLA1;H3BQA8;H0YL19;H0YN81;Q9GZS3	WD repeat-containing protein 61;WD repeat-containing protein 61, N-terminally processed	WDR61	tr|H0YLA1|H0YLA1_HUMAN WD repeat-containing protein 61 (Fragment) OS=Homo sapiens GN=WDR61 PE=1 SV=1;tr|H3BQA8|H3BQA8_HUMAN WD repeat-containing protein 61 (Fragment) OS=Homo sapiens GN=WDR61 PE=1 SV=1;tr|H0YL19|H0YL19_HUMAN WD repeat-containing protein 61	77378	0	98422	0	92713	234980
H0YL72;P50213;H0YMU3;H0YNF5;H0YLI6;H0YKD0	H0YL72;P50213;H0YMU3	Isocitrate dehydrogenase [NAD] subunit alpha, mitochondrial	IDH3A	tr|H0YL72|H0YL72_HUMAN Isocitrate dehydrogenase [NAD] subunit alpha, mitochondrial OS=Homo sapiens GN=IDH3A PE=1 SV=1;sp|P50213|IDH3A_HUMAN Isocitrate dehydrogenase [NAD] subunit alpha, mitochondrial OS=Homo sapiens GN=IDH3A PE=1 SV=1;tr|H0YMU3|H0YMU3_HUMA	35786	0	16146	81838	416220	543940
H0YLC0;Q03169	H0YLC0;Q03169	Tumor necrosis factor alpha-induced protein 2	TNFAIP2	tr|H0YLC0|H0YLC0_HUMAN Tumor necrosis factor alpha-induced protein 2 (Fragment) OS=Homo sapiens GN=TNFAIP2 PE=1 SV=1;sp|Q03169|TNAP2_HUMAN Tumor necrosis factor alpha-induced protein 2 OS=Homo sapiens GN=TNFAIP2 PE=2 SV=2	39057	0.00088968	23164	0	0	8178
H0YMG7;O94788;Q9UED3;H0YKL3;A0A0U1RQK9;H0Y2X5;P47895	H0YMG7;O94788;Q9UED3;H0YKL3;A0A0U1RQK9;H0Y2X5;P47895	Retinal dehydrogenase 2;Aldehyde dehydrogenase family 1 member A3	ALDH1A2;RALDH2;ALDH1A3	tr|H0YMG7|H0YMG7_HUMAN Retinal dehydrogenase 2 OS=Homo sapiens GN=ALDH1A2 PE=1 SV=1;sp|O94788|AL1A2_HUMAN Retinal dehydrogenase 2 OS=Homo sapiens GN=ALDH1A2 PE=1 SV=3;tr|Q9UED3|Q9UED3_HUMAN RALDH2-T (Fragment) OS=Homo sapiens GN=RALDH2 PE=1 SV=1;tr|H0YKL3|	53762	0	44277	0	56776	201710
H0YNE9;Q92930	H0YNE9;Q92930	Ras-related protein Rab-8B	RAB8B	tr|H0YNE9|H0YNE9_HUMAN Ras-related protein Rab-8B (Fragment) OS=Homo sapiens GN=RAB8B PE=1 SV=1;sp|Q92930|RAB8B_HUMAN Ras-related protein Rab-8B OS=Homo sapiens GN=RAB8B PE=1 SV=2	21868	0	7481	0	0	77048
H3BLU7;O43488;Q8NHP1;H7C5H7	H3BLU7;O43488	Aflatoxin B1 aldehyde reductase member 2	AKR7A2	tr|H3BLU7|H3BLU7_HUMAN Aflatoxin B1 aldehyde reductase member 2 (Fragment) OS=Homo sapiens GN=AKR7A2 PE=1 SV=1;sp|O43488|ARK72_HUMAN Aflatoxin B1 aldehyde reductase member 2 OS=Homo sapiens GN=AKR7A2 PE=1 SV=3	34684	0	48972	298280	1340500	1678900
H3BLZ8;Q92841;J3QSF1;J3KRZ1;J3KTA4;P17844	H3BLZ8;Q92841;J3QSF1;J3KRZ1;J3KTA4;P17844	Probable ATP-dependent RNA helicase DDX17;Probable ATP-dependent RNA helicase DDX5	DDX17;DDX5	tr|H3BLZ8|H3BLZ8_HUMAN Probable ATP-dependent RNA helicase DDX17 OS=Homo sapiens GN=DDX17 PE=1 SV=1;sp|Q92841|DDX17_HUMAN Probable ATP-dependent RNA helicase DDX17 OS=Homo sapiens GN=DDX17 PE=1 SV=2;tr|J3QSF1|J3QSF1_HUMAN Probable ATP-dependent RNA helicas	80439	0	2795	0	83735	114420
H3BM67;H3BUP2;H3BUN4;H3BQJ5;O60936	H3BM67;H3BUP2;H3BUN4;H3BQJ5;O60936	Nucleolar protein 3	NOL3	tr|H3BM67|H3BM67_HUMAN Nucleolar protein 3 (Fragment) OS=Homo sapiens GN=NOL3 PE=1 SV=7;tr|H3BUP2|H3BUP2_HUMAN Nucleolar protein 3 (Fragment) OS=Homo sapiens GN=NOL3 PE=1 SV=1;tr|H3BUN4|H3BUN4_HUMAN Nucleolar protein 3 (Fragment) OS=Homo sapiens GN=NOL3 PE	15022	0.0024834	17019	0	0	2687.4
H3BM89;P36578	H3BM89;P36578	60S ribosomal protein L4	RPL4	tr|H3BM89|H3BM89_HUMAN 60S ribosomal protein L4 OS=Homo sapiens GN=RPL4 PE=1 SV=1;sp|P36578|RL4_HUMAN 60S ribosomal protein L4 OS=Homo sapiens GN=RPL4 PE=1 SV=5	37657	0	3305	472560	126100	137620
Q86WV2;H3BPG0;H3BN72;H3BNV9;P13073	Q86WV2;H3BPG0;H3BN72;H3BNV9;P13073	Cytochrome c oxidase subunit 4 isoform 1, mitochondrial	COX4I1	tr|Q86WV2|Q86WV2_HUMAN COX4I1 protein OS=Homo sapiens GN=COX4I1 PE=1 SV=1;tr|H3BPG0|H3BPG0_HUMAN Cytochrome c oxidase subunit 4 isoform 1, mitochondrial (Fragment) OS=Homo sapiens GN=COX4I1 PE=1 SV=1;tr|H3BN72|H3BN72_HUMAN Cytochrome c oxidase subunit 4 is	92906	0.0025084	1806	0	0	44364
H3BND3;O43809;H3BV41	H3BND3;O43809;H3BV41	Cleavage and polyadenylation specificity factor subunit 5	NUDT21	tr|H3BND3|H3BND3_HUMAN Cleavage and polyadenylation-specificity factor subunit 5 (Fragment) OS=Homo sapiens GN=NUDT21 PE=1 SV=7;sp|O43809|CPSF5_HUMAN Cleavage and polyadenylation specificity factor subunit 5 OS=Homo sapiens GN=NUDT21 PE=1 SV=1;tr|H3BV41|H3	17227	0	11683	0	110840	207310
H3BRN4;H3BNQ7;P80404	H3BRN4;H3BNQ7;P80404	4-aminobutyrate aminotransferase, mitochondrial	ABAT	tr|H3BRN4|H3BRN4_HUMAN 4-aminobutyrate aminotransferase, mitochondrial OS=Homo sapiens GN=ABAT PE=1 SV=1;tr|H3BNQ7|H3BNQ7_HUMAN 4-aminobutyrate aminotransferase, mitochondrial OS=Homo sapiens GN=ABAT PE=1 SV=1;sp|P80404|GABT_HUMAN 4-aminobutyrate aminotran	58.14	0	29385	0	60957	24047
H3BRM5;H3BV69;H3BNX8;P20674	H3BRM5;H3BV69;H3BNX8;P20674	Cytochrome c oxidase subunit 5A, mitochondrial	COX5A	tr|H3BRM5|H3BRM5_HUMAN Cytochrome c oxidase subunit 5A, mitochondrial OS=Homo sapiens GN=COX5A PE=1 SV=1;tr|H3BV69|H3BV69_HUMAN Cytochrome c oxidase subunit 5A, mitochondrial OS=Homo sapiens GN=COX5A PE=1 SV=1;tr|H3BNX8|H3BNX8_HUMAN Cytochrome c oxidase su	7771	0	28906	0	387730	323800
H3BPK3;Q16775;H3BPQ4;H3BQW8;H3BV79	H3BPK3;Q16775;H3BPQ4;H3BQW8	Hydroxyacylglutathione hydrolase, mitochondrial	HAGH	tr|H3BPK3|H3BPK3_HUMAN Hydroxyacylglutathione hydrolase, mitochondrial (Fragment) OS=Homo sapiens GN=HAGH PE=1 SV=1;sp|Q16775|GLO2_HUMAN Hydroxyacylglutathione hydrolase, mitochondrial OS=Homo sapiens GN=HAGH PE=1 SV=2;tr|H3BPQ4|H3BPQ4_HUMAN Hydroxyacylglu	26305	0	24315	450480	657590	643510
H3BPN6;H3BT78;Q6PHR2	H3BPN6;H3BT78;Q6PHR2	Serine/threonine-protein kinase ULK3	ULK3	tr|H3BPN6|H3BPN6_HUMAN Serine/threonine-protein kinase ULK3 OS=Homo sapiens GN=ULK3 PE=1 SV=1;tr|H3BT78|H3BT78_HUMAN Serine/threonine-protein kinase ULK3 OS=Homo sapiens GN=ULK3 PE=1 SV=1;sp|Q6PHR2|ULK3_HUMAN Serine/threonine-protein kinase ULK3 OS=Homo sa	92547	0	15147	0	0	8820.3
H3BRE0;H3BTH6;Q8NEZ5	H3BRE0;H3BTH6;Q8NEZ5	F-box only protein 22	FBXO22	tr|H3BRE0|H3BRE0_HUMAN F-box only protein 22 OS=Homo sapiens GN=FBXO22 PE=1 SV=1;tr|H3BTH6|H3BTH6_HUMAN F-box only protein 22 (Fragment) OS=Homo sapiens GN=FBXO22 PE=1 SV=1;sp|Q8NEZ5|FBX22_HUMAN F-box only protein 22 OS=Homo sapiens GN=FBXO22 PE=1 SV=1	10304	0	15315	0	0	45821
H3BRG4;P22695;H3BSJ9;H3BUE4;H3BUI9;H3BP04;A0A087WVZ4	H3BRG4;P22695;H3BSJ9;H3BUE4;H3BUI9;H3BP04	Cytochrome b-c1 complex subunit 2, mitochondrial	UQCRC2	tr|H3BRG4|H3BRG4_HUMAN Cytochrome b-c1 complex subunit 2, mitochondrial OS=Homo sapiens GN=UQCRC2 PE=1 SV=1;sp|P22695|QCR2_HUMAN Cytochrome b-c1 complex subunit 2, mitochondrial OS=Homo sapiens GN=UQCRC2 PE=1 SV=3;tr|H3BSJ9|H3BSJ9_HUMAN Cytochrome b-c1 com	44634	0	58582	649780	405120	351600
H3BRR0;Q9NZD8	H3BRR0;Q9NZD8	Maspardin	SPG21	tr|H3BRR0|H3BRR0_HUMAN Maspardin OS=Homo sapiens GN=SPG21 PE=1 SV=1;sp|Q9NZD8|SPG21_HUMAN Maspardin OS=Homo sapiens GN=SPG21 PE=1 SV=1	17258	0	26045	0	60717	0
H3BRY3;P31146	H3BRY3;P31146	Coronin;Coronin-1A	CORO1A	tr|H3BRY3|H3BRY3_HUMAN Coronin OS=Homo sapiens GN=CORO1A PE=1 SV=1;sp|P31146|COR1A_HUMAN Coronin-1A OS=Homo sapiens GN=CORO1A PE=1 SV=4	43353	0.0093168	13434	0	0	12196
H3BRY5;P50226;P50225;E9PKR8;E9PKW4;H3BQX5;E9PM76	H3BRY5;P50226;P50225;E9PKR8;E9PKW4	Sulfotransferase;Sulfotransferase 1A2;Sulfotransferase 1A1	SULT1A1;SULT1A2	tr|H3BRY5|H3BRY5_HUMAN Sulfotransferase (Fragment) OS=Homo sapiens GN=SULT1A1 PE=1 SV=1;sp|P50226|ST1A2_HUMAN Sulfotransferase 1A2 OS=Homo sapiens GN=SULT1A2 PE=1 SV=2;sp|P50225|ST1A1_HUMAN Sulfotransferase 1A1 OS=Homo sapiens GN=SULT1A1 PE=1 SV=3;tr|E9PKR	32625	0	4.9	0	425810	194860
H3BS70;Q96DC0;P42126	H3BS70;Q96DC0;P42126	Enoyl-CoA delta isomerase 1, mitochondrial	ECI1;DCI	tr|H3BS70|H3BS70_HUMAN Enoyl-CoA delta isomerase 1, mitochondrial (Fragment) OS=Homo sapiens GN=ECI1 PE=1 SV=1;tr|Q96DC0|Q96DC0_HUMAN DCI protein OS=Homo sapiens GN=DCI PE=1 SV=1;sp|P42126|ECI1_HUMAN Enoyl-CoA delta isomerase 1, mitochondrial OS=Homo sapie	24704	0	2716	0	0	6317
I3L4X0;H3BV22;H3BTA2;P60510	I3L4X0;H3BV22;H3BTA2;P60510	Serine/threonine-protein phosphatase;Serine/threonine-protein phosphatase 4 catalytic subunit	PPP4C	tr|I3L4X0|I3L4X0_HUMAN Protein phosphatase 4 (Formerly X), catalytic subunit, isoform CRA_b OS=Homo sapiens GN=PPP4C PE=1 SV=1;tr|H3BV22|H3BV22_HUMAN Serine/threonine-protein phosphatase (Fragment) OS=Homo sapiens GN=PPP4C PE=1 SV=1;tr|H3BTA2|H3BTA2_HUMAN	13.37	0	26226	0	0	32003
H3BTN5;H3BQ34;H3BT25;H3BUW1;H3BTJ2;H3BU13;H3BN34;H3BQZ3	H3BTN5;H3BQ34	Pyruvate kinase	PKM	tr|H3BTN5|H3BTN5_HUMAN Pyruvate kinase (Fragment) OS=Homo sapiens GN=PKM PE=1 SV=1;tr|H3BQ34|H3BQ34_HUMAN Pyruvate kinase OS=Homo sapiens GN=PKM PE=1 SV=1	53045	0	25969	10381000	11779000	14315000
H7BY35;Q92736	H7BY35;Q92736	Ryanodine receptor 2	RYR2	tr|H7BY35|H7BY35_HUMAN Ryanodine receptor 2 OS=Homo sapiens GN=RYR2 PE=1 SV=2;sp|Q92736|RYR2_HUMAN Ryanodine receptor 2 OS=Homo sapiens GN=RYR2 PE=1 SV=3	562.6	0	78322	0	61322	137700
H7BZE4;Q01449;C9JEG4;H7C243;H7C482;H7C1B1;H7C3E3	H7BZE4;Q01449;C9JEG4;H7C243;H7C482	Myosin regulatory light chain 2, atrial isoform	MYL7	tr|H7BZE4|H7BZE4_HUMAN Myosin regulatory light chain 2, atrial isoform (Fragment) OS=Homo sapiens GN=MYL7 PE=1 SV=1;sp|Q01449|MLRA_HUMAN Myosin regulatory light chain 2, atrial isoform OS=Homo sapiens GN=MYL7 PE=1 SV=1;tr|C9JEG4|C9JEG4_HUMAN Myosin regulat	21653	0	133.56	936510	1063200	4647900
H7C0P7;Q8ND76;Q8N7R7;Q5T2Q4	H7C0P7;Q8ND76;Q8N7R7;Q5T2Q4	Cyclin-Y;Cyclin-Y-like protein 1;Cyclin-Y-like protein 2	CCNYL1;CCNY;CCNYL2	tr|H7C0P7|H7C0P7_HUMAN Cyclin-Y-like protein 1 (Fragment) OS=Homo sapiens GN=CCNYL1 PE=1 SV=1;sp|Q8ND76|CCNY_HUMAN Cyclin-Y OS=Homo sapiens GN=CCNY PE=1 SV=2;sp|Q8N7R7|CCYL1_HUMAN Cyclin-Y-like protein 1 OS=Homo sapiens GN=CCNYL1 PE=1 SV=2;sp|Q5T2Q4|CCYL2_	17033	0.0025	17682	0	0	8157.2
H7C0X5;Q9H3G5;H7C218;A0A087WVP6	H7C0X5;Q9H3G5;H7C218;A0A087WVP6	Probable serine carboxypeptidase CPVL	CPVL	tr|H7C0X5|H7C0X5_HUMAN Probable serine carboxypeptidase CPVL (Fragment) OS=Homo sapiens GN=CPVL PE=1 SV=1;sp|Q9H3G5|CPVL_HUMAN Probable serine carboxypeptidase CPVL OS=Homo sapiens GN=CPVL PE=1 SV=2;tr|H7C218|H7C218_HUMAN Probable serine carboxypeptidase C	21076	0	29247	0	208330	76378
H7C1X3;Q13177	H7C1X3;Q13177	Serine/threonine-protein kinase PAK 2;PAK-2p27;PAK-2p34	PAK2	tr|H7C1X3|H7C1X3_HUMAN Serine/threonine-protein kinase PAK 2 (Fragment) OS=Homo sapiens GN=PAK2 PE=1 SV=1;sp|Q13177|PAK2_HUMAN Serine/threonine-protein kinase PAK 2 OS=Homo sapiens GN=PAK2 PE=1 SV=3	24.37	0.0056634	15388	0	6425.4	0
H9KV48;P05155;E9PGN7	H9KV48;P05155;E9PGN7	Plasma protease C1 inhibitor	SERPING1	tr|H9KV48|H9KV48_HUMAN Plasma protease C1 inhibitor OS=Homo sapiens GN=SERPING1 PE=1 SV=1;sp|P05155|IC1_HUMAN Plasma protease C1 inhibitor OS=Homo sapiens GN=SERPING1 PE=1 SV=2;tr|E9PGN7|E9PGN7_HUMAN Plasma protease C1 inhibitor OS=Homo sapiens GN=SERPING1	50989	0	6936	0	233880	56377
I3L1K6;P12829;I3L4B1;I3L532;I3L3U1;P05976	I3L1K6;P12829;I3L4B1;I3L532	Myosin light chain 4	MYL4	tr|I3L1K6|I3L1K6_HUMAN Myosin light chain 4 (Fragment) OS=Homo sapiens GN=MYL4 PE=1 SV=1;sp|P12829|MYL4_HUMAN Myosin light chain 4 OS=Homo sapiens GN=MYL4 PE=1 SV=3;tr|I3L4B1|I3L4B1_HUMAN Myosin light chain 4 (Fragment) OS=Homo sapiens GN=MYL4 PE=1 SV=1;tr	18873	0	30981	1302100	519320	1239900
I3L1P8;Q02978	I3L1P8;Q02978	Mitochondrial 2-oxoglutarate/malate carrier protein	SLC25A11	tr|I3L1P8|I3L1P8_HUMAN Mitochondrial 2-oxoglutarate/malate carrier protein (Fragment) OS=Homo sapiens GN=SLC25A11 PE=1 SV=1;sp|Q02978|M2OM_HUMAN Mitochondrial 2-oxoglutarate/malate carrier protein OS=Homo sapiens GN=SLC25A11 PE=1 SV=3	32182	0	72214	0	48572	57168
I3L1R7;Q99447;I3L2Q1;I3L1L9;I3L3V9;I3L1C4	I3L1R7;Q99447;I3L2Q1;I3L1L9	Ethanolamine-phosphate cytidylyltransferase	PCYT2	tr|I3L1R7|I3L1R7_HUMAN Ethanolamine-phosphate cytidylyltransferase OS=Homo sapiens GN=PCYT2 PE=1 SV=1;sp|Q99447|PCY2_HUMAN Ethanolamine-phosphate cytidylyltransferase OS=Homo sapiens GN=PCYT2 PE=1 SV=1;tr|I3L2Q1|I3L2Q1_HUMAN Ethanolamine-phosphate cytidyly	41395	0	17687	182740	430920	786310
I3L213	I3L213		PHKB	tr|I3L213|I3L213_HUMAN Phosphorylase b kinase regulatory subunit beta (Fragment) OS=Homo sapiens GN=PHKB PE=1 SV=1	23538	0	18094	0	126840	0
I3L2Q8;Q9UIC8;I3L4A2	I3L2Q8;Q9UIC8;I3L4A2	Leucine carboxyl methyltransferase 1	LCMT1	tr|I3L2Q8|I3L2Q8_HUMAN Leucine carboxyl methyltransferase 1 (Fragment) OS=Homo sapiens GN=LCMT1 PE=1 SV=1;sp|Q9UIC8|LCMT1_HUMAN Leucine carboxyl methyltransferase 1 OS=Homo sapiens GN=LCMT1 PE=1 SV=2;tr|I3L4A2|I3L4A2_HUMAN Leucine carboxyl methyltransferas	13.74	0	96166	0	100820	167310
I3L2V9;P10253	I3L2V9;P10253	Lysosomal alpha-glucosidase;76 kDa lysosomal alpha-glucosidase;70 kDa lysosomal alpha-glucosidase	GAA	tr|I3L2V9|I3L2V9_HUMAN Lysosomal alpha-glucosidase (Fragment) OS=Homo sapiens GN=GAA PE=1 SV=1;sp|P10253|LYAG_HUMAN Lysosomal alpha-glucosidase OS=Homo sapiens GN=GAA PE=1 SV=4	9.92	0.0094044	13929	0	77481	0
I3L397;I3L504;P63241;F8WCJ1;C9J7B5;C9J4W5;Q9GZV4;Q6IS14	I3L397;I3L504;P63241	Eukaryotic translation initiation factor 5A;Eukaryotic translation initiation factor 5A-1	EIF5A	tr|I3L397|I3L397_HUMAN Eukaryotic translation initiation factor 5A (Fragment) OS=Homo sapiens GN=EIF5A PE=1 SV=7;tr|I3L504|I3L504_HUMAN Eukaryotic translation initiation factor 5A-1 OS=Homo sapiens GN=EIF5A PE=1 SV=1;sp|P63241|IF5A1_HUMAN Eukaryotic transl	16118	0	10481	0	153850	228050
I3L3P7;P62244;I3L246;H3BN98;H3BV27;H3BT37;I3L303;H3BVC7	I3L3P7;P62244;I3L246;H3BN98	40S ribosomal protein S15a	RPS15A	tr|I3L3P7|I3L3P7_HUMAN 40S ribosomal protein S15a OS=Homo sapiens GN=RPS15A PE=1 SV=1;sp|P62244|RS15A_HUMAN 40S ribosomal protein S15a OS=Homo sapiens GN=RPS15A PE=1 SV=2;tr|I3L246|I3L246_HUMAN 40S ribosomal protein S15a OS=Homo sapiens GN=RPS15A PE=1 SV=1	11477	0	14583	440090	764540	1639000
I3L3V5;I3L3S0;Q9Y5R8	I3L3V5;I3L3S0;Q9Y5R8	Trafficking protein particle complex subunit 1	TRAPPC1	tr|I3L3V5|I3L3V5_HUMAN Trafficking protein particle complex subunit 1 (Fragment) OS=Homo sapiens GN=TRAPPC1 PE=1 SV=1;tr|I3L3S0|I3L3S0_HUMAN Trafficking protein particle complex subunit 1 (Fragment) OS=Homo sapiens GN=TRAPPC1 PE=1 SV=1;sp|Q9Y5R8|TPPC1_HUMA	91055	0.0017138	20843	0	0	63194
J3KN16;Q5VYK3;R4GMY1;F6XAQ5	J3KN16;Q5VYK3	Proteasome-associated protein ECM29 homolog	KIAA0368;ECM29	tr|J3KN16|J3KN16_HUMAN Proteasome-associated protein ECM29 homolog OS=Homo sapiens GN=KIAA0368 PE=1 SV=1;sp|Q5VYK3|ECM29_HUMAN Proteasome-associated protein ECM29 homolog OS=Homo sapiens GN=ECM29 PE=1 SV=2	223.69	0	16981	0	172820	199630
J3KNJ2;Q7L2H7;H0YCQ8;E9PN86	J3KNJ2;Q7L2H7;H0YCQ8	Eukaryotic translation initiation factor 3 subunit M	EIF3M	tr|J3KNJ2|J3KNJ2_HUMAN Eukaryotic translation initiation factor 3 subunit M (Fragment) OS=Homo sapiens GN=EIF3M PE=1 SV=1;sp|Q7L2H7|EIF3M_HUMAN Eukaryotic translation initiation factor 3 subunit M OS=Homo sapiens GN=EIF3M PE=1 SV=1;tr|H0YCQ8|H0YCQ8_HUMAN E	21692	0	33958	0	147640	217210
J3KNQ4;Q9NVD7;E9PS97	J3KNQ4;Q9NVD7;E9PS97	Alpha-parvin	PARVA	tr|J3KNQ4|J3KNQ4_HUMAN Alpha-parvin OS=Homo sapiens GN=PARVA PE=1 SV=1;sp|Q9NVD7|PARVA_HUMAN Alpha-parvin OS=Homo sapiens GN=PARVA PE=1 SV=1;tr|E9PS97|E9PS97_HUMAN Alpha-parvin (Fragment) OS=Homo sapiens GN=PARVA PE=1 SV=1	46589	0	39.36	0	753860	557770
J3KNS1;Q9UPW5	J3KNS1;Q9UPW5	Cytosolic carboxypeptidase 1	AGTPBP1	tr|J3KNS1|J3KNS1_HUMAN Cytosolic carboxypeptidase 1 OS=Homo sapiens GN=AGTPBP1 PE=1 SV=1;sp|Q9UPW5|CBPC1_HUMAN Cytosolic carboxypeptidase 1 OS=Homo sapiens GN=AGTPBP1 PE=1 SV=3	143.23	0.0086682	14052	0	0	5891.8
J3KPM9;P42224	J3KPM9;P42224	Signal transducer and activator of transcription;Signal transducer and activator of transcription 1-alpha/beta	STAT1	tr|J3KPM9|J3KPM9_HUMAN Signal transducer and activator of transcription OS=Homo sapiens GN=STAT1 PE=1 SV=1;sp|P42224|STAT1_HUMAN Signal transducer and activator of transcription 1-alpha/beta OS=Homo sapiens GN=STAT1 PE=1 SV=2	83359	0	61448	0	35227	32639
J3KPS3;P04075;H3BQN4;H3BPS8;H3BUH7;H3BR04;H3BMQ8;H3BU78;H3BR68	J3KPS3;P04075;H3BQN4;H3BPS8;H3BUH7;H3BR04;H3BMQ8	Fructose-bisphosphate aldolase;Fructose-bisphosphate aldolase A	ALDOA	tr|J3KPS3|J3KPS3_HUMAN Fructose-bisphosphate aldolase OS=Homo sapiens GN=ALDOA PE=1 SV=1;sp|P04075|ALDOA_HUMAN Fructose-bisphosphate aldolase A OS=Homo sapiens GN=ALDOA PE=1 SV=2;tr|H3BQN4|H3BQN4_HUMAN Fructose-bisphosphate aldolase OS=Homo sapiens GN=ALDO	39817	0	226.56	26894000	24503000	24297000
J3KQ32;Q9NTK5;C9JTK6	J3KQ32;Q9NTK5	Obg-like ATPase 1	OLA1	tr|J3KQ32|J3KQ32_HUMAN Obg-like ATPase 1 OS=Homo sapiens GN=OLA1 PE=1 SV=1;sp|Q9NTK5|OLA1_HUMAN Obg-like ATPase 1 OS=Homo sapiens GN=OLA1 PE=1 SV=2	46937	0	31902	0	1266200	1413400
J3KR97;Q9BTW9;I3L0V3;I3L120;A0A0J9YXU4;A0A0J9YWI5;A0A0J9YVR1	J3KR97;Q9BTW9	Tubulin-specific chaperone D	TBCD	tr|J3KR97|J3KR97_HUMAN Tubulin-specific chaperone D OS=Homo sapiens GN=TBCD PE=1 SV=1;sp|Q9BTW9|TBCD_HUMAN Tubulin-specific chaperone D OS=Homo sapiens GN=TBCD PE=1 SV=2	136.55	0	70539	0	52171	185450
J3KRC4;Q8TCD5;J3KSX6;J3KSY6	J3KRC4;Q8TCD5;J3KSX6	5(3)-deoxyribonucleotidase, cytosolic type	NT5C	tr|J3KRC4|J3KRC4_HUMAN 5(3)-deoxyribonucleotidase, cytosolic type OS=Homo sapiens GN=NT5C PE=1 SV=1;sp|Q8TCD5|NT5C_HUMAN 5(3)-deoxyribonucleotidase, cytosolic type OS=Homo sapiens GN=NT5C PE=1 SV=2;tr|J3KSX6|J3KSX6_HUMAN 5(3)-deoxyribonucleotidase, c	20456	0	15161	0	201870	208000
J3KRE2;J3KTF8;J3QQX2;P52565	J3KRE2;J3KTF8;J3QQX2;P52565	Rho GDP-dissociation inhibitor 1	ARHGDIA	tr|J3KRE2|J3KRE2_HUMAN Rho GDP-dissociation inhibitor 1 OS=Homo sapiens GN=ARHGDIA PE=1 SV=1;tr|J3KTF8|J3KTF8_HUMAN Rho GDP-dissociation inhibitor 1 (Fragment) OS=Homo sapiens GN=ARHGDIA PE=1 SV=7;tr|J3QQX2|J3QQX2_HUMAN Rho GDP-dissociation inhibitor 1 OS=	14814	0	10.88	0	0	297700
J3KS22;J3QS36;Q7Z4W1;J3QS45;J3KRZ4;J3KSZ5;J3QL34	J3KS22;J3QS36;Q7Z4W1	L-xylulose reductase	DCXR	tr|J3KS22|J3KS22_HUMAN L-xylulose reductase (Fragment) OS=Homo sapiens GN=DCXR PE=1 SV=7;tr|J3QS36|J3QS36_HUMAN L-xylulose reductase (Fragment) OS=Homo sapiens GN=DCXR PE=1 SV=1;sp|Q7Z4W1|DCXR_HUMAN L-xylulose reductase OS=Homo sapiens GN=DCXR PE=1 SV=2	23.96	0	69783	0	239170	117200
J3QLV6;J3KSS5;Q6QEF8;K7ERF4;J3QRV4	J3QLV6;J3KSS5;Q6QEF8;K7ERF4;J3QRV4	Coronin;Coronin-6	CORO6	tr|J3QLV6|J3QLV6_HUMAN Coronin OS=Homo sapiens GN=CORO6 PE=1 SV=1;tr|J3KSS5|J3KSS5_HUMAN Coronin OS=Homo sapiens GN=CORO6 PE=1 SV=1;sp|Q6QEF8|CORO6_HUMAN Coronin-6 OS=Homo sapiens GN=CORO6 PE=1 SV=2;tr|K7ERF4|K7ERF4_HUMAN Coronin (Fragment) OS=Homo sapiens	48283	0	5979	0	227200	223490
J3KST3;Q5TA50	J3KST3;Q5TA50	Ceramide-1-phosphate transfer protein	CPTP	tr|J3KST3|J3KST3_HUMAN Ceramide-1-phosphate transfer protein (Fragment) OS=Homo sapiens GN=CPTP PE=1 SV=7;sp|Q5TA50|CPTP_HUMAN Ceramide-1-phosphate transfer protein OS=Homo sapiens GN=CPTP PE=1 SV=1	13689	0	4635	0	0	3263.2
J3QRJ1;J3QL71;Q96FV2;J3QR84;J3QQM9;J3KS57;J3KT79	J3QRJ1;J3QL71;Q96FV2;J3QR84;J3QQM9	Secernin-2	SCRN2	tr|J3QRJ1|J3QRJ1_HUMAN Secernin-2 OS=Homo sapiens GN=SCRN2 PE=1 SV=1;tr|J3QL71|J3QL71_HUMAN Secernin-2 OS=Homo sapiens GN=SCRN2 PE=1 SV=1;sp|Q96FV2|SCRN2_HUMAN Secernin-2 OS=Homo sapiens GN=SCRN2 PE=1 SV=3;tr|J3QR84|J3QR84_HUMAN Secernin-2 (Fragment) OS=Ho	29592	0	22822	0	340680	909110
K4DI93;Q13620	K4DI93;Q13620	Cullin-4B	CUL4B	tr|K4DI93|K4DI93_HUMAN Cullin 4B, isoform CRA_e OS=Homo sapiens GN=CUL4B PE=1 SV=1;sp|Q13620|CUL4B_HUMAN Cullin-4B OS=Homo sapiens GN=CUL4B PE=1 SV=4	102.75	0	41619	0	0	7127.2
K7EIG1;O75153;I3L2B0;I3L318;Q9Y5I4	K7EIG1;O75153;I3L2B0	Clustered mitochondria protein homolog	CLUH	tr|K7EIG1|K7EIG1_HUMAN Clustered mitochondria protein homolog (Fragment) OS=Homo sapiens GN=CLUH PE=1 SV=2;sp|O75153|CLU_HUMAN Clustered mitochondria protein homolog OS=Homo sapiens GN=CLUH PE=1 SV=2;tr|I3L2B0|I3L2B0_HUMAN Clustered mitochondria protein ho	140.49	0	32.82	292380	879370	1148200
K7EM02;K7EIJ8;Q8IYT4	K7EM02;K7EIJ8;Q8IYT4	Katanin p60 ATPase-containing subunit A-like 2	KATNAL2	tr|K7EM02|K7EM02_HUMAN Katanin p60 ATPase-containing subunit A-like 2 (Fragment) OS=Homo sapiens GN=KATNAL2 PE=1 SV=1;tr|K7EIJ8|K7EIJ8_HUMAN Katanin p60 ATPase-containing subunit A-like 2 (Fragment) OS=Homo sapiens GN=KATNAL2 PE=1 SV=1;sp|Q8IYT4|KATL2_HUMA	13999	0.00091075	25076	0	0	1489300
K7EIU4;Q63ZY3	K7EIU4;Q63ZY3	KN motif and ankyrin repeat domain-containing protein 2	KANK2	tr|K7EIU4|K7EIU4_HUMAN KN motif and ankyrin repeat domain-containing protein 2 (Fragment) OS=Homo sapiens GN=KANK2 PE=1 SV=1;sp|Q63ZY3|KANK2_HUMAN KN motif and ankyrin repeat domain-containing protein 2 OS=Homo sapiens GN=KANK2 PE=1 SV=1	23954	0	10.53	0	0	26723
K7EJE8;K7EKE6;P36776;K7ER27	K7EJE8;K7EKE6;P36776;K7ER27	Lon protease homolog, mitochondrial	LONP1	tr|K7EJE8|K7EJE8_HUMAN Lon protease homolog, mitochondrial OS=Homo sapiens GN=LONP1 PE=1 SV=1;tr|K7EKE6|K7EKE6_HUMAN Lon protease homolog, mitochondrial OS=Homo sapiens GN=LONP1 PE=1 SV=1;sp|P36776|LONM_HUMAN Lon protease homolog, mitochondrial OS=Homo sap	93296	0	45712	0	8688.5	0
K7EJR3;R4GMR5;P48556;K7EJC1;K7ERW6;K7ENY6	K7EJR3;R4GMR5;P48556;K7EJC1	26S proteasome non-ATPase regulatory subunit 8	PSMD8	tr|K7EJR3|K7EJR3_HUMAN 26S proteasome non-ATPase regulatory subunit 8 (Fragment) OS=Homo sapiens GN=PSMD8 PE=1 SV=7;tr|R4GMR5|R4GMR5_HUMAN 26S proteasome non-ATPase regulatory subunit 8 OS=Homo sapiens GN=PSMD8 PE=1 SV=1;sp|P48556|PSMD8_HUMAN 26S proteasom	28162	0	13041	0	407610	646070
K7EK18;K7EL40;Q9UHD8;K7EIR4;K7EKN4;K7EN52;K7ENQ5;K7EJZ2;K7ELJ9;K7ER52;K7EIE4;K7ER14;K7EQD7	K7EK18;K7EL40;Q9UHD8;K7EIR4;K7EKN4;K7EN52;K7ENQ5;K7EJZ2;K7ELJ9;K7ER52;K7EIE4;K7ER14;K7EQD7	Septin-9	SEPT9	tr|K7EK18|K7EK18_HUMAN Septin-9 (Fragment) OS=Homo sapiens GN=SEPT9 PE=1 SV=1;tr|K7EL40|K7EL40_HUMAN Septin-9 (Fragment) OS=Homo sapiens GN=SEPT9 PE=1 SV=1;sp|Q9UHD8|SEPT9_HUMAN Septin-9 OS=Homo sapiens GN=SEPT9 PE=1 SV=2;tr|K7EIR4|K7EIR4_HUMAN Septin-9 (F	22217	0	12055	0	141350	99230
K7EKY5;P22748;K7EIH9	K7EKY5;P22748	Carbonic anhydrase 4	CA4	tr|K7EKY5|K7EKY5_HUMAN Carbonic anhydrase 4 (Fragment) OS=Homo sapiens GN=CA4 PE=1 SV=1;sp|P22748|CAH4_HUMAN Carbonic anhydrase 4 OS=Homo sapiens GN=CA4 PE=1 SV=2	20.71	0	34372	655920	0	66145
M0QX52;K7EL66;K7ERD8;Q15555;K7ENB3;C9JB30;Q9UPY8	M0QX52;K7EL66;K7ERD8;Q15555;K7ENB3;C9JB30;Q9UPY8	Microtubule-associated protein RP/EB family member 2;Microtubule-associated protein RP/EB family member 3	MAPRE2;MAPRE3	tr|M0QX52|M0QX52_HUMAN Microtubule-associated protein RP/EB family member 2 (Fragment) OS=Homo sapiens GN=MAPRE2 PE=1 SV=1;tr|K7EL66|K7EL66_HUMAN Microtubule-associated protein RP/EB family member 2 (Fragment) OS=Homo sapiens GN=MAPRE2 PE=1 SV=1;tr|K7ERD8|	14.92	0	10362	0	166660	158600
K7ELW0;Q99497	K7ELW0;Q99497	Protein deglycase DJ-1	PARK7	tr|K7ELW0|K7ELW0_HUMAN Protein deglycase DJ-1 OS=Homo sapiens GN=PARK7 PE=1 SV=1;sp|Q99497|PARK7_HUMAN Protein deglycase DJ-1 OS=Homo sapiens GN=PARK7 PE=1 SV=2	17.91	0.00089767	24051	0	74067	106310
K7EN02;P19429	K7EN02;P19429	Troponin I, cardiac muscle	TNNI3	tr|K7EN02|K7EN02_HUMAN Troponin I, cardiac muscle OS=Homo sapiens GN=TNNI3 PE=1 SV=1;sp|P19429|TNNI3_HUMAN Troponin I, cardiac muscle OS=Homo sapiens GN=TNNI3 PE=1 SV=3	21327	0	41964	5496900	3991200	2983000
K7EP32;Q9BZV1	K7EP32;Q9BZV1	UBX domain-containing protein 6	UBXN6	tr|K7EP32|K7EP32_HUMAN UBX domain-containing protein 6 (Fragment) OS=Homo sapiens GN=UBXN6 PE=1 SV=1;sp|Q9BZV1|UBXN6_HUMAN UBX domain-containing protein 6 OS=Homo sapiens GN=UBXN6 PE=1 SV=1	41958	0	26849	0	0	13606
K7EP46;P52888	K7EP46;P52888	Thimet oligopeptidase	THOP1	tr|K7EP46|K7EP46_HUMAN Thimet oligopeptidase OS=Homo sapiens GN=THOP1 PE=1 SV=1;sp|P52888|THOP1_HUMAN Thimet oligopeptidase OS=Homo sapiens GN=THOP1 PE=1 SV=2	65119	0	4523	0	0	14298
K7ER00;Q9Y285;K7EK06;K7ER16;K7EPH2	K7ER00;Q9Y285	Phenylalanine--tRNA ligase alpha subunit	FARSA	tr|K7ER00|K7ER00_HUMAN Phenylalanine--tRNA ligase alpha subunit OS=Homo sapiens GN=FARSA PE=1 SV=1;sp|Q9Y285|SYFA_HUMAN Phenylalanine--tRNA ligase alpha subunit OS=Homo sapiens GN=FARSA PE=1 SV=3	62395	0	12846	0	591810	1071400
K7ER96;O43396;K7EML9;K7EPB7	K7ER96;O43396;K7EML9	Thioredoxin-like protein 1	TXNL1	tr|K7ER96|K7ER96_HUMAN Thioredoxin-like protein 1 (Fragment) OS=Homo sapiens GN=TXNL1 PE=1 SV=1;sp|O43396|TXNL1_HUMAN Thioredoxin-like protein 1 OS=Homo sapiens GN=TXNL1 PE=1 SV=3;tr|K7EML9|K7EML9_HUMAN Thioredoxin-like protein 1 (Fragment) OS=Homo sapiens	31355	0	10538	0	292790	402680
K7ES11;Q9C0C9	K7ES11;Q9C0C9	E2/E3 hybrid ubiquitin-protein ligase UBE2O	UBE2O	tr|K7ES11|K7ES11_HUMAN (E3-independent) E2 ubiquitin-conjugating enzyme (Fragment) OS=Homo sapiens GN=UBE2O PE=1 SV=1;sp|Q9C0C9|UBE2O_HUMAN (E3-independent) E2 ubiquitin-conjugating enzyme OS=Homo sapiens GN=UBE2O PE=1 SV=3	88749	0	28567	0	22570	45747
K7ES70;P55083	K7ES70;P55083	Microfibril-associated glycoprotein 4	MFAP4	tr|K7ES70|K7ES70_HUMAN Microfibril-associated glycoprotein 4 OS=Homo sapiens GN=MFAP4 PE=1 SV=1;sp|P55083|MFAP4_HUMAN Microfibril-associated glycoprotein 4 OS=Homo sapiens GN=MFAP4 PE=1 SV=2	31326	0.0017301	21279	0	35939	0
K7N7A8;P29972	K7N7A8;P29972	Aquaporin-1	AQP1	tr|K7N7A8|K7N7A8_HUMAN Uncharacterized protein (Fragment) OS=Homo sapiens PE=3 SV=2;sp|P29972|AQP1_HUMAN Aquaporin-1 OS=Homo sapiens GN=AQP1 PE=1 SV=3	48685	0	77956	577990	0	0
M0QYL7;M0R1W6;M0QXS5;P14866	M0QYL7;M0R1W6;M0QXS5;P14866	Heterogeneous nuclear ribonucleoprotein L	HNRNPL	tr|M0QYL7|M0QYL7_HUMAN Heterogeneous nuclear ribonucleoprotein L (Fragment) OS=Homo sapiens GN=HNRNPL PE=1 SV=1;tr|M0R1W6|M0R1W6_HUMAN Heterogeneous nuclear ribonucleoprotein L (Fragment) OS=Homo sapiens GN=HNRNPL PE=1 SV=1;tr|M0QXS5|M0QXS5_HUMAN Heterogen	21892	0	28402	0	0	123680
M0QY43;Q7Z406	M0QY43;Q7Z406	Myosin-14	MYH14	tr|M0QY43|M0QY43_HUMAN Myosin-14 (Fragment) OS=Homo sapiens GN=MYH14 PE=1 SV=7;sp|Q7Z406|MYH14_HUMAN Myosin-14 OS=Homo sapiens GN=MYH14 PE=1 SV=2	113.85	0	29631	0	0	125780
Q8J015;M0QYS1;Q6NVV1;P40429	Q8J015;M0QYS1;Q6NVV1;P40429	Putative 60S ribosomal protein L13a protein RPL13AP3;60S ribosomal protein L13a	RPL13a;RPL13A;RPL13AP3	tr|Q8J015|Q8J015_HUMAN 60S ribosomal protein L13a OS=Homo sapiens GN=RPL13a PE=1 SV=1;tr|M0QYS1|M0QYS1_HUMAN 60S ribosomal protein L13a (Fragment) OS=Homo sapiens GN=RPL13A PE=1 SV=2;sp|Q6NVV1|R13P3_HUMAN Putative 60S ribosomal protein L13a protein RPL13AP	16731	0	30823	0	107410	38384
M0R0N4;M0QYZ2;P53680;M0QZ21;X6R390;M0R1S0	M0R0N4;M0QYZ2;P53680;M0QZ21;X6R390	AP-2 complex subunit sigma	AP2S1	tr|M0R0N4|M0R0N4_HUMAN AP-2 complex subunit sigma OS=Homo sapiens GN=AP2S1 PE=1 SV=1;tr|M0QYZ2|M0QYZ2_HUMAN AP-2 complex subunit sigma OS=Homo sapiens GN=AP2S1 PE=1 SV=1;sp|P53680|AP2S1_HUMAN AP-2 complex subunit sigma OS=Homo sapiens GN=AP2S1 PE=1 SV=2;tr	17303	0	36647	0	676180	985310
M0QZC5;P62280;M0R1H5	M0QZC5;P62280	40S ribosomal protein S11	RPS11	tr|M0QZC5|M0QZC5_HUMAN 40S ribosomal protein S11 OS=Homo sapiens GN=RPS11 PE=1 SV=1;sp|P62280|RS11_HUMAN 40S ribosomal protein S11 OS=Homo sapiens GN=RPS11 PE=1 SV=3	13997	0	63059	1303800	574260	959960
M0R0Y2;M0R2M1;P54920;M0R027;M0R058;M0R0I4	M0R0Y2;M0R2M1;P54920;M0R027;M0R058;M0R0I4	Alpha-soluble NSF attachment protein	NAPA	tr|M0R0Y2|M0R0Y2_HUMAN Alpha-soluble NSF attachment protein OS=Homo sapiens GN=NAPA PE=1 SV=1;tr|M0R2M1|M0R2M1_HUMAN Alpha-soluble NSF attachment protein (Fragment) OS=Homo sapiens GN=NAPA PE=1 SV=1;sp|P54920|SNAA_HUMAN Alpha-soluble NSF attachment protein	29163	0	6.76	124250	138390	144100
M0R3D6;M0R1A7;M0R117;Q02543;M0R0P7	M0R3D6;M0R1A7;M0R117;Q02543;M0R0P7	60S ribosomal protein L18a	RPL18A	tr|M0R3D6|M0R3D6_HUMAN 60S ribosomal protein L18a (Fragment) OS=Homo sapiens GN=RPL18A PE=1 SV=1;tr|M0R1A7|M0R1A7_HUMAN 60S ribosomal protein L18a OS=Homo sapiens GN=RPL18A PE=1 SV=1;tr|M0R117|M0R117_HUMAN 60S ribosomal protein L18a OS=Homo sapiens GN=RPL1	16714	0.0017021	19932	0	121960	198240
M0R210;P62249;A0A087WZ27;M0R3H0;M0QX76;M0R1M5;Q6IPX4	M0R210;P62249;A0A087WZ27;M0R3H0;M0QX76;M0R1M5	40S ribosomal protein S16	RPS16;ZNF90	tr|M0R210|M0R210_HUMAN 40S ribosomal protein S16 OS=Homo sapiens GN=RPS16 PE=1 SV=1;sp|P62249|RS16_HUMAN 40S ribosomal protein S16 OS=Homo sapiens GN=RPS16 PE=1 SV=2;tr|A0A087WZ27|A0A087WZ27_HUMAN Zinc finger protein 90 OS=Homo sapiens GN=ZNF90 PE=4 SV=2;t	14419	0	18265	3423300	1848900	2378500
M0R257;O95716;P20336	M0R257;O95716;P20336	Ras-related protein Rab-3D;Ras-related protein Rab-3A	RAB3A;RAB3D	tr|M0R257|M0R257_HUMAN Ras-related protein Rab-3A (Fragment) OS=Homo sapiens GN=RAB3A PE=1 SV=1;sp|O95716|RAB3D_HUMAN Ras-related protein Rab-3D OS=Homo sapiens GN=RAB3D PE=1 SV=1;sp|P20336|RAB3A_HUMAN Ras-related protein Rab-3A OS=Homo sapiens GN=RAB3A PE	13255	0.0063898	14842	0	10641	0
M0R333;Q09013	M0R333;Q09013	Myotonin-protein kinase	DMPK	tr|M0R333|M0R333_HUMAN Myotonin-protein kinase OS=Homo sapiens GN=DMPK PE=1 SV=1;sp|Q09013|DMPK_HUMAN Myotonin-protein kinase OS=Homo sapiens GN=DMPK PE=1 SV=3	70577	0	29485	0	21495	16730
O00186	O00186	Syntaxin-binding protein 3	STXBP3	sp|O00186|STXB3_HUMAN Syntaxin-binding protein 3 OS=Homo sapiens GN=STXBP3 PE=1 SV=2	67764	0	30694	0	24240	0
O00231;J3QRY4;J3QS13;J3KSW3	O00231	26S proteasome non-ATPase regulatory subunit 11	PSMD11	sp|O00231|PSD11_HUMAN 26S proteasome non-ATPase regulatory subunit 11 OS=Homo sapiens GN=PSMD11 PE=1 SV=3	47463	0	97.94	525490	2501900	2652800
O00232;J3KTJ5;J3KSK1	O00232	26S proteasome non-ATPase regulatory subunit 12	PSMD12	sp|O00232|PSD12_HUMAN 26S proteasome non-ATPase regulatory subunit 12 OS=Homo sapiens GN=PSMD12 PE=1 SV=3	52904	0	64356	0	1131400	1366200
O00299	O00299	Chloride intracellular channel protein 1	CLIC1	sp|O00299|CLIC1_HUMAN Chloride intracellular channel protein 1 OS=Homo sapiens GN=CLIC1 PE=1 SV=4	26922	0	57128	558030	993340	999770
O00303;H0YDT6;E9PQV8	O00303	Eukaryotic translation initiation factor 3 subunit F	EIF3F	sp|O00303|EIF3F_HUMAN Eukaryotic translation initiation factor 3 subunit F OS=Homo sapiens GN=EIF3F PE=1 SV=1	37563	0	66396	379260	866250	1525900
O00442	O00442	RNA 3-terminal phosphate cyclase	RTCA	sp|O00442|RTCA_HUMAN RNA 3-terminal phosphate cyclase OS=Homo sapiens GN=RTCA PE=1 SV=1	39336	0	14759	0	179030	228680
O00487;C9JW37	O00487	26S proteasome non-ATPase regulatory subunit 14	PSMD14	sp|O00487|PSDE_HUMAN 26S proteasome non-ATPase regulatory subunit 14 OS=Homo sapiens GN=PSMD14 PE=1 SV=1	34577	0	13465	280460	812210	897500
O00505;O00629;H0Y4S9	O00505;O00629	Importin subunit alpha-4;Importin subunit alpha-3	KPNA3;KPNA4	sp|O00505|IMA4_HUMAN Importin subunit alpha-4 OS=Homo sapiens GN=KPNA3 PE=1 SV=2;sp|O00629|IMA3_HUMAN Importin subunit alpha-3 OS=Homo sapiens GN=KPNA4 PE=1 SV=1	57.81	0	34819	0	301190	513350
O00743;Q5T1S7	O00743	Serine/threonine-protein phosphatase 6 catalytic subunit;Serine/threonine-protein phosphatase 6 catalytic subunit, N-terminally processed	PPP6C	sp|O00743|PPP6_HUMAN Serine/threonine-protein phosphatase 6 catalytic subunit OS=Homo sapiens GN=PPP6C PE=1 SV=1	35144	0	25984	0	103480	240100
O00764;F2Z2Y4;A8MV33	O00764;F2Z2Y4	Pyridoxal kinase	PDXK	sp|O00764|PDXK_HUMAN Pyridoxal kinase OS=Homo sapiens GN=PDXK PE=1 SV=1;tr|F2Z2Y4|F2Z2Y4_HUMAN Pyridoxal kinase OS=Homo sapiens GN=PDXK PE=1 SV=1	35102	0	51876	0	581090	972970
O14558;K7EP04	O14558;K7EP04	Heat shock protein beta-6	HSPB6	sp|O14558|HSPB6_HUMAN Heat shock protein beta-6 OS=Homo sapiens GN=HSPB6 PE=1 SV=2;tr|K7EP04|K7EP04_HUMAN Heat shock protein beta-6 OS=Homo sapiens GN=HSPB6 PE=1 SV=1	17135	0	21136	1310200	3976400	2739000
O14617;K7ERW8;K7ELX8;A0A087WYN6	O14617	AP-3 complex subunit delta-1	AP3D1	sp|O14617|AP3D1_HUMAN AP-3 complex subunit delta-1 OS=Homo sapiens GN=AP3D1 PE=1 SV=1	130.16	0	25255	0	170280	353490
O14646	O14646	Chromodomain-helicase-DNA-binding protein 1	CHD1	sp|O14646|CHD1_HUMAN Chromodomain-helicase-DNA-binding protein 1 OS=Homo sapiens GN=CHD1 PE=1 SV=2	196.69	0.0025295	18912	0	0	114820
O14744;H0YJX6;G3V5L5;G3V580;H0YJ77;H0YJD3;G3V2L6;G3V2X6;C9JSX3	O14744;H0YJX6	Protein arginine N-methyltransferase 5;Protein arginine N-methyltransferase 5, N-terminally processed	PRMT5	sp|O14744|ANM5_HUMAN Protein arginine N-methyltransferase 5 OS=Homo sapiens GN=PRMT5 PE=1 SV=4;tr|H0YJX6|H0YJX6_HUMAN Protein arginine N-methyltransferase 5 (Fragment) OS=Homo sapiens GN=PRMT5 PE=1 SV=1	72683	0	14259	164280	482990	657770
O14807	O14807	Ras-related protein M-Ras	MRAS	sp|O14807|RASM_HUMAN Ras-related protein M-Ras OS=Homo sapiens GN=MRAS PE=1 SV=2	23846	0	26154	0	86249	91011
O14841;A0A087WY99	O14841	5-oxoprolinase	OPLAH	sp|O14841|OPLA_HUMAN 5-oxoprolinase OS=Homo sapiens GN=OPLAH PE=1 SV=3	137.46	0	124.09	492790	1468200	2079900
Q5VV87;Q5VV89;O14880	Q5VV87;Q5VV89;O14880	Microsomal glutathione S-transferase 3	MGST3	tr|Q5VV87|Q5VV87_HUMAN Microsomal glutathione S-transferase 3 OS=Homo sapiens GN=MGST3 PE=1 SV=1;tr|Q5VV89|Q5VV89_HUMAN Microsomal glutathione S-transferase 3 OS=Homo sapiens GN=MGST3 PE=1 SV=1;sp|O14880|MGST3_HUMAN Microsomal glutathione S-transferase 3 O	14379	0	14.38	0	82321	0
O14958	O14958	Calsequestrin-2	CASQ2	sp|O14958|CASQ2_HUMAN Calsequestrin-2 OS=Homo sapiens GN=CASQ2 PE=1 SV=2	46435	0	24408	25817000	828270	574520
O14980;C9JKM9;C9J673;H7BZC5;C9IZS4;C9JQ02;C9JV99;F8WF71;C9JF49;C9IYM2	O14980	Exportin-1	XPO1	sp|O14980|XPO1_HUMAN Exportin-1 OS=Homo sapiens GN=XPO1 PE=1 SV=1	123.38	0	233.72	693060	2185700	3626400
O15143;C9JBJ7;C9K057;C9J4Z7;F8VXW2;C9JEY1;C9JQM8;C9JFG9;C9J6C8	O15143;C9JBJ7;C9K057;C9J4Z7;F8VXW2;C9JEY1;C9JQM8;C9JFG9;C9J6C8	Actin-related protein 2/3 complex subunit 1B	ARPC1B	sp|O15143|ARC1B_HUMAN Actin-related protein 2/3 complex subunit 1B OS=Homo sapiens GN=ARPC1B PE=1 SV=3;tr|C9JBJ7|C9JBJ7_HUMAN Actin-related protein 2/3 complex subunit 1B (Fragment) OS=Homo sapiens GN=ARPC1B PE=1 SV=1;tr|C9K057|C9K057_HUMAN Actin-related p	40949	0	29115	0	132450	213680
O15144;H7C3F9;C9JTV5;G5E9J0;G5E9S7	O15144	Actin-related protein 2/3 complex subunit 2	ARPC2	sp|O15144|ARPC2_HUMAN Actin-related protein 2/3 complex subunit 2 OS=Homo sapiens GN=ARPC2 PE=1 SV=1	34333	0	46827	678110	1398600	1847100
O15371	O15371	Eukaryotic translation initiation factor 3 subunit D	EIF3D	sp|O15371|EIF3D_HUMAN Eukaryotic translation initiation factor 3 subunit D OS=Homo sapiens GN=EIF3D PE=1 SV=1	63972	0	63885	0	432770	418060
O43143	O43143	Pre-mRNA-splicing factor ATP-dependent RNA helicase DHX15	DHX15	sp|O43143|DHX15_HUMAN Pre-mRNA-splicing factor ATP-dependent RNA helicase DHX15 OS=Homo sapiens GN=DHX15 PE=1 SV=2	90932	0	31358	0	327820	403910
Q5SZU1;O43175	Q5SZU1;O43175	D-3-phosphoglycerate dehydrogenase	PHGDH	tr|Q5SZU1|Q5SZU1_HUMAN D-3-phosphoglycerate dehydrogenase OS=Homo sapiens GN=PHGDH PE=1 SV=1;sp|O43175|SERA_HUMAN D-3-phosphoglycerate dehydrogenase OS=Homo sapiens GN=PHGDH PE=1 SV=4	53085	0	45967	189920	134000	225120
O43242;H0YGV8	O43242	26S proteasome non-ATPase regulatory subunit 3	PSMD3	sp|O43242|PSMD3_HUMAN 26S proteasome non-ATPase regulatory subunit 3 OS=Homo sapiens GN=PSMD3 PE=1 SV=2	60977	0	120.14	1192300	2061500	2838200
O43294	O43294	Transforming growth factor beta-1-induced transcript 1 protein	TGFB1I1	sp|O43294|TGFI1_HUMAN Transforming growth factor beta-1-induced transcript 1 protein OS=Homo sapiens GN=TGFB1I1 PE=1 SV=2	49814	0	29276	0	7409.7	0
O43301	O43301	Heat shock 70 kDa protein 12A	HSPA12A	sp|O43301|HS12A_HUMAN Heat shock 70 kDa protein 12A OS=Homo sapiens GN=HSPA12A PE=1 SV=2	74977	0	94466	0	80320	114250
O43592	O43592	Exportin-T	XPOT	sp|O43592|XPOT_HUMAN Exportin-T OS=Homo sapiens GN=XPOT PE=1 SV=2	109.96	0	51942	0	40243	70700
O43707;F5GXS2;H7C144	O43707	Alpha-actinin-4	ACTN4	sp|O43707|ACTN4_HUMAN Alpha-actinin-4 OS=Homo sapiens GN=ACTN4 PE=1 SV=2	104.85	0.00088183	22525	264050	0	0
O43741;F5H2X8;Q9Y478	O43741;F5H2X8;Q9Y478	5-AMP-activated protein kinase subunit beta-2;5-AMP-activated protein kinase subunit beta-1	PRKAB2;PRKAB1	sp|O43741|AAKB2_HUMAN 5-AMP-activated protein kinase subunit beta-2 OS=Homo sapiens GN=PRKAB2 PE=1 SV=1;tr|F5H2X8|F5H2X8_HUMAN 5-AMP-activated protein kinase subunit beta-1 OS=Homo sapiens GN=PRKAB1 PE=1 SV=1;sp|Q9Y478|AAKB1_HUMAN 5-AMP-activated protei	30302	0.0017123	2079	0	56964	110200
O43747	O43747	AP-1 complex subunit gamma-1	AP1G1	sp|O43747|AP1G1_HUMAN AP-1 complex subunit gamma-1 OS=Homo sapiens GN=AP1G1 PE=1 SV=5	91.35	0	9515	0	0	0
O43776;K7EMQ6;K7EPK2;K7EQ35;K7EIU7	O43776	Asparagine--tRNA ligase, cytoplasmic	NARS	sp|O43776|SYNC_HUMAN Asparagine--tRNA ligase, cytoplasmic OS=Homo sapiens GN=NARS PE=1 SV=1	62942	0	36711	456500	907510	1301300
O60256;C9JJS3;C9K0K7;I3L0S1;E7EPA1;C9JDU5;C9JDH0;E7EW35	O60256;C9JJS3;C9K0K7;I3L0S1;E7EPA1;C9JDU5	Phosphoribosyl pyrophosphate synthase-associated protein 2	PRPSAP2	sp|O60256|KPRB_HUMAN Phosphoribosyl pyrophosphate synthase-associated protein 2 OS=Homo sapiens GN=PRPSAP2 PE=1 SV=1;tr|C9JJS3|C9JJS3_HUMAN Phosphoribosyl pyrophosphate synthase-associated protein 2 (Fragment) OS=Homo sapiens GN=PRPSAP2 PE=1 SV=1;tr|C9K0K7	40925	0	82802	0	78363	126260
O60518	O60518	Ran-binding protein 6	RANBP6	sp|O60518|RNBP6_HUMAN Ran-binding protein 6 OS=Homo sapiens GN=RANBP6 PE=1 SV=2	124.71	0.008641	13994	0	0	3152.8
Q5VUC6;P30419;O60551	Q5VUC6;P30419;O60551	Glycylpeptide N-tetradecanoyltransferase;Glycylpeptide N-tetradecanoyltransferase 1;Glycylpeptide N-tetradecanoyltransferase 2	NMT2;NMT1	tr|Q5VUC6|Q5VUC6_HUMAN Glycylpeptide N-tetradecanoyltransferase OS=Homo sapiens GN=NMT2 PE=1 SV=1;sp|P30419|NMT1_HUMAN Glycylpeptide N-tetradecanoyltransferase 1 OS=Homo sapiens GN=NMT1 PE=1 SV=2;sp|O60551|NMT2_HUMAN Glycylpeptide N-tetradecanoyltransferas	56716	0	39055	0	119960	141640
O60662;E9PBE3	O60662	Kelch-like protein 41	KLHL41	sp|O60662|KLH41_HUMAN Kelch-like protein 41 OS=Homo sapiens GN=KLHL41 PE=1 SV=2	68036	0	27717	0	663370	289750
O60701	O60701	UDP-glucose 6-dehydrogenase	UGDH	sp|O60701|UGDH_HUMAN UDP-glucose 6-dehydrogenase OS=Homo sapiens GN=UGDH PE=1 SV=1	55023	0.00089127	23438	0	26086	0
O60749;H0YK42;Q13596	O60749;H0YK42;Q13596	Sorting nexin-2;Sorting nexin-1	SNX2;SNX1	sp|O60749|SNX2_HUMAN Sorting nexin-2 OS=Homo sapiens GN=SNX2 PE=1 SV=2;tr|H0YK42|H0YK42_HUMAN Sorting nexin-1 OS=Homo sapiens GN=SNX1 PE=1 SV=1;sp|Q13596|SNX1_HUMAN Sorting nexin-1 OS=Homo sapiens GN=SNX1 PE=1 SV=3	58.47	0	12.56	173710	191900	0
O60763;REV__R4GMN2;REV__Q5VZ89;REV__R4GNB2;REV__R4GN35	O60763	General vesicular transport factor p115	USO1	sp|O60763|USO1_HUMAN General vesicular transport factor p115 OS=Homo sapiens GN=USO1 PE=1 SV=2	107.89	0	72762	518620	830000	1836000
O60825;F6RAZ1;I1Z9G3;P16118	O60825	6-phosphofructo-2-kinase/fructose-2,6-bisphosphatase 2;6-phosphofructo-2-kinase;Fructose-2,6-bisphosphatase	PFKFB2	sp|O60825|F262_HUMAN 6-phosphofructo-2-kinase/fructose-2,6-bisphosphatase 2 OS=Homo sapiens GN=PFKFB2 PE=1 SV=2	58476	0	10466	0	445590	370220
O60826	O60826	Coiled-coil domain-containing protein 22	CCDC22	sp|O60826|CCD22_HUMAN Coiled-coil domain-containing protein 22 OS=Homo sapiens GN=CCDC22 PE=1 SV=1	70755	0	9849	0	19669	29231
O60884;A0A087WT48	O60884;A0A087WT48	DnaJ homolog subfamily A member 2	DNAJA2	sp|O60884|DNJA2_HUMAN DnaJ homolog subfamily A member 2 OS=Homo sapiens GN=DNAJA2 PE=1 SV=1;tr|A0A087WT48|A0A087WT48_HUMAN DnaJ homolog subfamily A member 2 (Fragment) OS=Homo sapiens GN=DNAJA2 PE=1 SV=1	45745	0	10847	0	108010	75437
O75083;D6RD66	O75083;D6RD66	WD repeat-containing protein 1	WDR1	sp|O75083|WDR1_HUMAN WD repeat-containing protein 1 OS=Homo sapiens GN=WDR1 PE=1 SV=4;tr|D6RD66|D6RD66_HUMAN WD repeat-containing protein 1 (Fragment) OS=Homo sapiens GN=WDR1 PE=1 SV=1	66193	0	111.45	6220200	4810700	6460700
O75112;A0A0C4DGG7;A0A096LPD7	O75112	LIM domain-binding protein 3	LDB3	sp|O75112|LDB3_HUMAN LIM domain-binding protein 3 OS=Homo sapiens GN=LDB3 PE=1 SV=2	77134	0	55853	3211400	7062800	9926900
O75131;A0A087WYQ3;A0A087WXR6;E5RHZ0;A0A087WUS8;H0YB26;E7ENV7;Q96FN4;Q8IYJ1;Q96A23;O95741;Q86YQ8;Q9HCH3;Q9UBL6	O75131;A0A087WYQ3	Copine-3	CPNE3	sp|O75131|CPNE3_HUMAN Copine-3 OS=Homo sapiens GN=CPNE3 PE=1 SV=1;tr|A0A087WYQ3|A0A087WYQ3_HUMAN Copine-3 (Fragment) OS=Homo sapiens GN=CPNE3 PE=1 SV=1	60.13	0	12073	1991200	466350	670610
O75155	O75155	Cullin-associated NEDD8-dissociated protein 2	CAND2	sp|O75155|CAND2_HUMAN Cullin-associated NEDD8-dissociated protein 2 OS=Homo sapiens GN=CAND2 PE=1 SV=3	135.25	0	25598	0	214530	50929
O75165	O75165	DnaJ homolog subfamily C member 13	DNAJC13	sp|O75165|DJC13_HUMAN DnaJ homolog subfamily C member 13 OS=Homo sapiens GN=DNAJC13 PE=1 SV=5	254.41	0.00088574	22795	0	3869.7	0
O75306	O75306	NADH dehydrogenase [ubiquinone] iron-sulfur protein 2, mitochondrial	NDUFS2	sp|O75306|NDUS2_HUMAN NADH dehydrogenase [ubiquinone] iron-sulfur protein 2, mitochondrial OS=Homo sapiens GN=NDUFS2 PE=1 SV=2	52545	0	17523	109320	122860	82681
S4R3Q6;O75436;Q4G0F5	S4R3Q6;O75436;Q4G0F5	Vacuolar protein sorting-associated protein 26A;Vacuolar protein sorting-associated protein 26B	VPS26A;VPS26B	tr|S4R3Q6|S4R3Q6_HUMAN Vacuolar protein sorting-associated protein 26A OS=Homo sapiens GN=VPS26A PE=1 SV=1;sp|O75436|VP26A_HUMAN Vacuolar protein sorting-associated protein 26A OS=Homo sapiens GN=VPS26A PE=1 SV=2;sp|Q4G0F5|VP26B_HUMAN Vacuolar protein sort	26197	0.0086751	14097	0	0	34014
O75489;E9PS48;E9PKL8;G3V194	O75489	NADH dehydrogenase [ubiquinone] iron-sulfur protein 3, mitochondrial	NDUFS3	sp|O75489|NDUS3_HUMAN NADH dehydrogenase [ubiquinone] iron-sulfur protein 3, mitochondrial OS=Homo sapiens GN=NDUFS3 PE=1 SV=1	30241	0	24223	193260	363880	169360
O75531	O75531	Barrier-to-autointegration factor;Barrier-to-autointegration factor, N-terminally processed	BANF1	sp|O75531|BAF_HUMAN Barrier-to-autointegration factor OS=Homo sapiens GN=BANF1 PE=1 SV=1	10058	0	5.24	0	0	20668
O75533;H7C341	O75533;H7C341	Splicing factor 3B subunit 1	SF3B1	sp|O75533|SF3B1_HUMAN Splicing factor 3B subunit 1 OS=Homo sapiens GN=SF3B1 PE=1 SV=3;tr|H7C341|H7C341_HUMAN Splicing factor 3B subunit 1 (Fragment) OS=Homo sapiens GN=SF3B1 PE=1 SV=1	145.83	0.0008673	21538	0	46571	43237
O75828	O75828	Carbonyl reductase [NADPH] 3	CBR3	sp|O75828|CBR3_HUMAN Carbonyl reductase [NADPH] 3 OS=Homo sapiens GN=CBR3 PE=1 SV=3	30.85	0	26273	0	0	541340
O75874;C9J4N6;C9JJE5;C9JLU6	O75874	Isocitrate dehydrogenase [NADP] cytoplasmic	IDH1	sp|O75874|IDHC_HUMAN Isocitrate dehydrogenase [NADP] cytoplasmic OS=Homo sapiens GN=IDH1 PE=1 SV=2	46659	0	77142	1279500	1763500	1612000
O75891;C9IZ36;Q3SY69	O75891	Cytosolic 10-formyltetrahydrofolate dehydrogenase	ALDH1L1	sp|O75891|AL1L1_HUMAN Cytosolic 10-formyltetrahydrofolate dehydrogenase OS=Homo sapiens GN=ALDH1L1 PE=1 SV=2	98828	0	53777	104080	727810	114650
O76041;A0A0U1RQY0	O76041;A0A0U1RQY0	Nebulette	NEBL	sp|O76041|NEBL_HUMAN Nebulette OS=Homo sapiens GN=NEBL PE=1 SV=1;tr|A0A0U1RQY0|A0A0U1RQY0_HUMAN Nebulette (Fragment) OS=Homo sapiens GN=NEBL PE=1 SV=1	116.45	0	26542	0	25327	0
O94829	O94829	Importin-13	IPO13	sp|O94829|IPO13_HUMAN Importin-13 OS=Homo sapiens GN=IPO13 PE=1 SV=3	108.19	0	45676	0	9165.6	38561
O94874	O94874	E3 UFM1-protein ligase 1	UFL1	sp|O94874|UFL1_HUMAN E3 UFM1-protein ligase 1 OS=Homo sapiens GN=UFL1 PE=1 SV=2	89594	0	21056	0	220880	416620
O94973;A0A0G2JS82;A0A0G2JQM1;E9PR62;A0A0G2JRF9;A0A0G2JQA4;E9PQP4;A0A0G2JRS3;A0A0G2JS17;A0A0G2JQT9;H0YEG0;H0YDE9;M0R2D9;E9PPZ3;E9PS94;E9PNC4;E9PPY8	O94973;A0A0G2JS82;A0A0G2JQM1	AP-2 complex subunit alpha-2	AP2A2	sp|O94973|AP2A2_HUMAN AP-2 complex subunit alpha-2 OS=Homo sapiens GN=AP2A2 PE=1 SV=2;tr|A0A0G2JS82|A0A0G2JS82_HUMAN AP-2 complex subunit alpha-2 (Fragment) OS=Homo sapiens GN=AP2A2 PE=1 SV=1;tr|A0A0G2JQM1|A0A0G2JQM1_HUMAN AP-2 complex subunit alpha-2 (Fra	103.96	0	67889	315290	421600	495820
O95210	O95210	Starch-binding domain-containing protein 1	STBD1	sp|O95210|STBD1_HUMAN Starch-binding domain-containing protein 1 OS=Homo sapiens GN=STBD1 PE=1 SV=1	39007	0	46763	0	0	156410
O95278;H0Y6I8;H0Y7S8	O95278;H0Y6I8	Laforin	EPM2A	sp|O95278|EPM2A_HUMAN Laforin OS=Homo sapiens GN=EPM2A PE=1 SV=2;tr|H0Y6I8|H0Y6I8_HUMAN Laforin, isoform 9 (Fragment) OS=Homo sapiens GN=EPM2A PE=1 SV=1	37157	0	10732	140910	735790	1037600
O95373;E9PLB2	O95373	Importin-7	IPO7	sp|O95373|IPO7_HUMAN Importin-7 OS=Homo sapiens GN=IPO7 PE=1 SV=1	119.52	0	68156	341630	595710	630020
O95486	O95486	Protein transport protein Sec24A	SEC24A	sp|O95486|SC24A_HUMAN Protein transport protein Sec24A OS=Homo sapiens GN=SEC24A PE=1 SV=2	119.75	0	85698	0	15046	23057
O95487	O95487	Protein transport protein Sec24B	SEC24B	sp|O95487|SC24B_HUMAN Protein transport protein Sec24B OS=Homo sapiens GN=SEC24B PE=1 SV=2	137.42	0	12968	0	33940	24335
O95671	O95671	N-acetylserotonin O-methyltransferase-like protein	ASMTL	sp|O95671|ASML_HUMAN N-acetylserotonin O-methyltransferase-like protein OS=Homo sapiens GN=ASMTL PE=1 SV=3	68856	0	42403	0	43732	0
O95782	O95782	AP-2 complex subunit alpha-1	AP2A1	sp|O95782|AP2A1_HUMAN AP-2 complex subunit alpha-1 OS=Homo sapiens GN=AP2A1 PE=1 SV=3	107.54	0	39631	1183500	1567500	1677900
O95810	O95810	Serum deprivation-response protein	SDPR	sp|O95810|SDPR_HUMAN Serum deprivation-response protein OS=Homo sapiens GN=SDPR PE=1 SV=3	47173	0	45.98	118270	120730	151780
O95822	O95822	Malonyl-CoA decarboxylase, mitochondrial	MLYCD	sp|O95822|DCMC_HUMAN Malonyl-CoA decarboxylase, mitochondrial OS=Homo sapiens GN=MLYCD PE=1 SV=3	55003	0	49928	0	40298	41211
O95831;E9PMA0	O95831;E9PMA0	Apoptosis-inducing factor 1, mitochondrial	AIFM1	sp|O95831|AIFM1_HUMAN Apoptosis-inducing factor 1, mitochondrial OS=Homo sapiens GN=AIFM1 PE=1 SV=1;tr|E9PMA0|E9PMA0_HUMAN Apoptosis-inducing factor 1, mitochondrial OS=Homo sapiens GN=AIFM1 PE=1 SV=1	66.9	0	83798	109640	76787	51692
O95834;K7EIK7;A0A0C4DGQ7;C9JRL6;K7EKG3;K7EII6;K7EKU5;K7ERY9;K7ELB2;K7ERR9;K7ERR2;K7EIM1;K7ELI8;K7EQR0	O95834;K7EIK7;A0A0C4DGQ7;C9JRL6;K7EKG3	Echinoderm microtubule-associated protein-like 2	EML2	sp|O95834|EMAL2_HUMAN Echinoderm microtubule-associated protein-like 2 OS=Homo sapiens GN=EML2 PE=1 SV=1;tr|K7EIK7|K7EIK7_HUMAN Echinoderm microtubule-associated protein-like 2 OS=Homo sapiens GN=EML2 PE=1 SV=1;tr|A0A0C4DGQ7|A0A0C4DGQ7_HUMAN Echinoderm mic	70678	0	42522	1002400	1671000	1413000
O95865;A0A140T971;Q5SSV3;Q5SRR8;H0Y7N1	O95865;A0A140T971;Q5SSV3;Q5SRR8;H0Y7N1	N(G),N(G)-dimethylarginine dimethylaminohydrolase 2	DDAH2	sp|O95865|DDAH2_HUMAN N(G),N(G)-dimethylarginine dimethylaminohydrolase 2 OS=Homo sapiens GN=DDAH2 PE=1 SV=1;tr|A0A140T971|A0A140T971_HUMAN N(G),N(G)-dimethylarginine dimethylaminohydrolase 2 (Fragment) OS=Homo sapiens GN=DDAH2 PE=1 SV=1;tr|Q5SSV3|Q5SSV3_H	29644	0	27689	599540	184410	419510
O96019	O96019	Actin-like protein 6A	ACTL6A	sp|O96019|ACL6A_HUMAN Actin-like protein 6A OS=Homo sapiens GN=ACTL6A PE=1 SV=1	47.46	0	30438	0	0	117370
P00325;D6RHZ6;P07327;P00326;A0A087WU81;A0A087WUC4	P00325;D6RHZ6;P07327;P00326	Alcohol dehydrogenase 1B;Alcohol dehydrogenase 1A;Alcohol dehydrogenase 1C	ADH1B;ADH1A;ADH1C	sp|P00325|ADH1B_HUMAN Alcohol dehydrogenase 1B OS=Homo sapiens GN=ADH1B PE=1 SV=2;tr|D6RHZ6|D6RHZ6_HUMAN Alcohol dehydrogenase 1B OS=Homo sapiens GN=ADH1B PE=1 SV=2;sp|P07327|ADH1A_HUMAN Alcohol dehydrogenase 1A OS=Homo sapiens GN=ADH1A PE=1 SV=2;sp|P00326	39854	0	26.31	6554000	2017700	2240900
P00338;F5GXY2;F5GYU2;F5GXH2;F5GZQ4;F5H5J4;F5H6W8;F5H8H6;F5GXC7;F5GWW2;F5GXU1	P00338;F5GXY2;F5GYU2;F5GXH2	L-lactate dehydrogenase A chain	LDHA	sp|P00338|LDHA_HUMAN L-lactate dehydrogenase A chain OS=Homo sapiens GN=LDHA PE=1 SV=2;tr|F5GXY2|F5GXY2_HUMAN L-lactate dehydrogenase A chain (Fragment) OS=Homo sapiens GN=LDHA PE=1 SV=7;tr|F5GYU2|F5GYU2_HUMAN L-lactate dehydrogenase A chain (Fragment) OS=	36688	0	34347	933780	975450	583330
P00352;Q5SYQ7;Q5SYQ9;Q5SYQ8	P00352	Retinal dehydrogenase 1	ALDH1A1	sp|P00352|AL1A1_HUMAN Retinal dehydrogenase 1 OS=Homo sapiens GN=ALDH1A1 PE=1 SV=2	54861	0	83572	1322400	761610	853770
P00387;B1AHF3	P00387;B1AHF3	NADH-cytochrome b5 reductase 3;NADH-cytochrome b5 reductase 3 membrane-bound form;NADH-cytochrome b5 reductase 3 soluble form	CYB5R3	sp|P00387|NB5R3_HUMAN NADH-cytochrome b5 reductase 3 OS=Homo sapiens GN=CYB5R3 PE=1 SV=3;tr|B1AHF3|B1AHF3_HUMAN NADH-cytochrome b5 reductase 3 (Fragment) OS=Homo sapiens GN=CYB5R3 PE=1 SV=1	34234	0	99103	473900	1998900	2935300
P00403	P00403	Cytochrome c oxidase subunit 2	MT-CO2	sp|P00403|COX2_HUMAN Cytochrome c oxidase subunit 2 OS=Homo sapiens GN=MT-CO2 PE=1 SV=1	25565	0	25787	818370	517160	561270
P00488;Q9NQP5;A6PVK5;H0Y796	P00488	Coagulation factor XIII A chain	F13A1	sp|P00488|F13A_HUMAN Coagulation factor XIII A chain OS=Homo sapiens GN=F13A1 PE=1 SV=4	83266	0	48185	460700	1160000	316760
P00492	P00492	Hypoxanthine-guanine phosphoribosyltransferase	HPRT1	sp|P00492|HPRT_HUMAN Hypoxanthine-guanine phosphoribosyltransferase OS=Homo sapiens GN=HPRT1 PE=1 SV=2	24579	0	73655	0	0	56989
P00505	P00505	Aspartate aminotransferase, mitochondrial	GOT2	sp|P00505|AATM_HUMAN Aspartate aminotransferase, mitochondrial OS=Homo sapiens GN=GOT2 PE=1 SV=3	47517	0	28088	1137300	289090	213160
P00558	P00558	Phosphoglycerate kinase 1	PGK1	sp|P00558|PGK1_HUMAN Phosphoglycerate kinase 1 OS=Homo sapiens GN=PGK1 PE=1 SV=3	44614	0	245.87	14035000	44094000	36729000
Q5T9B7;P00568;H0Y4J6;H0YID2;Q9Y6K8	Q5T9B7;P00568;H0Y4J6	Adenylate kinase isoenzyme 1	AK1	tr|Q5T9B7|Q5T9B7_HUMAN Adenylate kinase isoenzyme 1 OS=Homo sapiens GN=AK1 PE=1 SV=1;sp|P00568|KAD1_HUMAN Adenylate kinase isoenzyme 1 OS=Homo sapiens GN=AK1 PE=1 SV=3;tr|H0Y4J6|H0Y4J6_HUMAN Adenylate kinase isoenzyme 1 (Fragment) OS=Homo sapiens GN=AK1 PE	23411	0	50659	1998100	4586900	3739900
P00740	P00740	Coagulation factor IX;Coagulation factor IXa light chain;Coagulation factor IXa heavy chain	F9	sp|P00740|FA9_HUMAN Coagulation factor IX OS=Homo sapiens GN=F9 PE=1 SV=2	51778	0	49457	0	131360	142940
P00747	P00747	Plasminogen;Plasmin heavy chain A;Activation peptide;Angiostatin;Plasmin heavy chain A, short form;Plasmin light chain B	PLG	sp|P00747|PLMN_HUMAN Plasminogen OS=Homo sapiens GN=PLG PE=1 SV=2	90568	0	51422	0	0	185150
P00966;Q5T6L5;Q5T6L6	P00966	Argininosuccinate synthase	ASS1	sp|P00966|ASSY_HUMAN Argininosuccinate synthase OS=Homo sapiens GN=ASS1 PE=1 SV=2	46.53	0	52558	0	278380	39104
P01009	P01009	Alpha-1-antitrypsin;Short peptide from AAT	SERPINA1	sp|P01009|A1AT_HUMAN Alpha-1-antitrypsin OS=Homo sapiens GN=SERPINA1 PE=1 SV=3	46736	0.00089686	23923	0	0	112900
P01019	P01019	Angiotensinogen;Angiotensin-1;Angiotensin-2;Angiotensin-3;Angiotensin-4;Angiotensin 1-9;Angiotensin 1-7;Angiotensin 1-5;Angiotensin 1-4	AGT	sp|P01019|ANGT_HUMAN Angiotensinogen OS=Homo sapiens GN=AGT PE=1 SV=1	53154	0	17.99	0	0	13468
P01023;P20742	P01023	Alpha-2-macroglobulin	A2M	sp|P01023|A2MG_HUMAN Alpha-2-macroglobulin OS=Homo sapiens GN=A2M PE=1 SV=3	163.29	0	35364	0	103450	64652
P01024;M0QXZ3	P01024	Complement C3;Complement C3 beta chain;C3-beta-c;Complement C3 alpha chain;C3a anaphylatoxin;Acylation stimulating protein;Complement C3b alpha chain;Complement C3c alpha chain fragment 1;Complement C3dg fragment;Complement C3g fragment;Complement C3d fragment;Complement C3f fragment;Complement C3c alpha chain fragment 2	C3	sp|P01024|CO3_HUMAN Complement C3 OS=Homo sapiens GN=C3 PE=1 SV=2	187.15	0	79855	206970	1128500	436490
P01040;C9J0E4	P01040;C9J0E4	Cystatin-A;Cystatin-A, N-terminally processed	CSTA	sp|P01040|CYTA_HUMAN Cystatin-A OS=Homo sapiens GN=CSTA PE=1 SV=1;tr|C9J0E4|C9J0E4_HUMAN Cystatin-A OS=Homo sapiens GN=CSTA PE=1 SV=1	11006	0	30458	2072400	242300	455860
P01876;A0A0G2JMB2;P01877	P01876;A0A0G2JMB2;P01877	Ig alpha-1 chain C region;Ig alpha-2 chain C region	IGHA1;IGHA2	sp|P01876|IGHA1_HUMAN Ig alpha-1 chain C region OS=Homo sapiens GN=IGHA1 PE=1 SV=2;tr|A0A0G2JMB2|A0A0G2JMB2_HUMAN Ig alpha-2 chain C region (Fragment) OS=Homo sapiens GN=IGHA2 PE=1 SV=1;sp|P01877|IGHA2_HUMAN Ig alpha-2 chain C region OS=Homo sapiens GN=IGH	37654	0	38896	331860	0	0
Q95365;Q29836;Q29718;P30480;P30475;P30462;P30460;P18463;P01889;Q31610;P30486	Q95365;Q29836;Q29718;P30480;P30475;P30462;P30460;P18463;P01889;Q31610;P30486	HLA class I histocompatibility antigen, B-38 alpha chain;HLA class I histocompatibility antigen, B-67 alpha chain;HLA class I histocompatibility antigen, B-82 alpha chain;HLA class I histocompatibility antigen, B-42 alpha chain;HLA class I histocompatibility antigen, B-39 alpha chain;HLA class I histocompatibility antigen, B-14 alpha chain;HLA class I histocompatibility antigen, B-8 alpha chain;H…	HLA-B	sp|Q95365|1B38_HUMAN HLA class I histocompatibility antigen, B-38 alpha chain OS=Homo sapiens GN=HLA-B PE=1 SV=1;sp|Q29836|1B67_HUMAN HLA class I histocompatibility antigen, B-67 alpha chain OS=Homo sapiens GN=HLA-B PE=1 SV=1;sp|Q29718|1B82_HUMAN HLA class	40416	0.009324	13444	0	81270	0
P02042;E9PFT6;E9PEW8;CON__Q3SX09;C9JRG0;A8MUF7;E9PBW4;CON__P02070;P69892;P69891;P02100	P02042;E9PFT6;E9PEW8	Hemoglobin subunit delta	HBD	sp|P02042|HBD_HUMAN Hemoglobin subunit delta OS=Homo sapiens GN=HBD PE=1 SV=2;tr|E9PFT6|E9PFT6_HUMAN Hemoglobin subunit delta OS=Homo sapiens GN=HBD PE=1 SV=1;tr|E9PEW8|E9PEW8_HUMAN Hemoglobin subunit delta (Fragment) OS=Homo sapiens GN=HBD PE=1 SV=1	16055	0	19988	0	566500	318300
Q3BDU5;P02545;H0YAB0;Q5TCI8	Q3BDU5;P02545;H0YAB0;Q5TCI8	Prelamin-A/C;Lamin-A/C	LMNA	tr|Q3BDU5|Q3BDU5_HUMAN Prelamin-A/C OS=Homo sapiens GN=LMNA PE=1 SV=1;sp|P02545|LMNA_HUMAN Prelamin-A/C OS=Homo sapiens GN=LMNA PE=1 SV=1;tr|H0YAB0|H0YAB0_HUMAN Prelamin-A/C (Fragment) OS=Homo sapiens GN=LMNA PE=1 SV=1;tr|Q5TCI8|Q5TCI8_HUMAN Prelamin-A/C O	55637	0	29999	276180	0	0
P02647;F8W696	P02647;F8W696	Apolipoprotein A-I;Proapolipoprotein A-I;Truncated apolipoprotein A-I	APOA1	sp|P02647|APOA1_HUMAN Apolipoprotein A-I OS=Homo sapiens GN=APOA1 PE=1 SV=1;tr|F8W696|F8W696_HUMAN Apolipoprotein A-I OS=Homo sapiens GN=APOA1 PE=1 SV=1	30777	0	44445	919970	801940	1431400
P02671;A0A087WUA0	P02671;A0A087WUA0	Fibrinogen alpha chain;Fibrinopeptide A;Fibrinogen alpha chain	FGA	sp|P02671|FIBA_HUMAN Fibrinogen alpha chain OS=Homo sapiens GN=FGA PE=1 SV=2;tr|A0A087WUA0|A0A087WUA0_HUMAN Fibrinogen alpha chain OS=Homo sapiens GN=FGA PE=1 SV=1	94972	0	40897	0	1036200	178880
P02675;D6REL8	P02675;D6REL8	Fibrinogen beta chain;Fibrinopeptide B;Fibrinogen beta chain	FGB	sp|P02675|FIBB_HUMAN Fibrinogen beta chain OS=Homo sapiens GN=FGB PE=1 SV=2;tr|D6REL8|D6REL8_HUMAN Fibrinogen beta chain OS=Homo sapiens GN=FGB PE=1 SV=1	55928	0	126.47	481630	3365000	287240
P02741	P02741	C-reactive protein;C-reactive protein(1-205)	CRP	sp|P02741|CRP_HUMAN C-reactive protein OS=Homo sapiens GN=CRP PE=1 SV=1	25038	0	73344	0	191150	0
P02743	P02743	Serum amyloid P-component;Serum amyloid P-component(1-203)	APCS	sp|P02743|SAMP_HUMAN Serum amyloid P-component OS=Homo sapiens GN=APCS PE=1 SV=2	25387	0	23508	3335500	406020	517850
P02751;H0Y7Z1;H0Y4K8	P02751	Fibronectin;Anastellin;Ugl-Y1;Ugl-Y2;Ugl-Y3	FN1	sp|P02751|FINC_HUMAN Fibronectin OS=Homo sapiens GN=FN1 PE=1 SV=4	262.62	0	19698	315190	614450	306200
P04004;H0YJW9;CON__Q3ZBS7	P04004	Vitronectin;Vitronectin V65 subunit;Vitronectin V10 subunit;Somatomedin-B	VTN	sp|P04004|VTNC_HUMAN Vitronectin OS=Homo sapiens GN=VTN PE=1 SV=1	54305	0	15417	775170	1383600	1177800
P04083;Q5T3N1;Q5T3N0	P04083;Q5T3N1	Annexin A1;Annexin	ANXA1	sp|P04083|ANXA1_HUMAN Annexin A1 OS=Homo sapiens GN=ANXA1 PE=1 SV=2;tr|Q5T3N1|Q5T3N1_HUMAN Annexin (Fragment) OS=Homo sapiens GN=ANXA1 PE=1 SV=1	38714	0	184.71	10020000	2274000	3739600
P04196	P04196	Histidine-rich glycoprotein	HRG	sp|P04196|HRG_HUMAN Histidine-rich glycoprotein OS=Homo sapiens GN=HRG PE=1 SV=1	59578	0	14.02	0	45986	48141
P04406;E7EUT5;O14556	P04406;E7EUT5	Glyceraldehyde-3-phosphate dehydrogenase	GAPDH	sp|P04406|G3P_HUMAN Glyceraldehyde-3-phosphate dehydrogenase OS=Homo sapiens GN=GAPDH PE=1 SV=3;tr|E7EUT5|E7EUT5_HUMAN Glyceraldehyde-3-phosphate dehydrogenase OS=Homo sapiens GN=GAPDH PE=1 SV=1	36053	0	202.78	21011000	82327000	113680000
P04792;F8WE04;C9J3N8	P04792;F8WE04	Heat shock protein beta-1	HSPB1	sp|P04792|HSPB1_HUMAN Heat shock protein beta-1 OS=Homo sapiens GN=HSPB1 PE=1 SV=2;tr|F8WE04|F8WE04_HUMAN Heat shock protein beta-1 OS=Homo sapiens GN=HSPB1 PE=1 SV=1	22782	0	93527	15134000	18413000	12993000
P04899;P63096;P11488;P19087;A8MTJ3;C9JPP4	P04899	Guanine nucleotide-binding protein G(i) subunit alpha-2	GNAI2	sp|P04899|GNAI2_HUMAN Guanine nucleotide-binding protein G(i) subunit alpha-2 OS=Homo sapiens GN=GNAI2 PE=1 SV=3	40.45	0	70676	6325000	1068100	2373500
P05023;Q5TC01;Q5TC02	P05023	Sodium/potassium-transporting ATPase subunit alpha-1	ATP1A1	sp|P05023|AT1A1_HUMAN Sodium/potassium-transporting ATPase subunit alpha-1 OS=Homo sapiens GN=ATP1A1 PE=1 SV=1	112.89	0	92951	8922900	2008600	1967000
P05026;V9GYR2	P05026;V9GYR2	Sodium/potassium-transporting ATPase subunit beta-1	ATP1B1	sp|P05026|AT1B1_HUMAN Sodium/potassium-transporting ATPase subunit beta-1 OS=Homo sapiens GN=ATP1B1 PE=1 SV=1;tr|V9GYR2|V9GYR2_HUMAN Sodium/potassium-transporting ATPase subunit beta (Fragment) OS=Homo sapiens GN=ATP1B1 PE=1 SV=1	35061	0	23132	1110400	887740	1060300
P05089	P05089	Arginase-1	ARG1	sp|P05089|ARGI1_HUMAN Arginase-1 OS=Homo sapiens GN=ARG1 PE=1 SV=2	34735	0	29561	887990	41981	0
P05091;F8VP50;S4R3S4	P05091	Aldehyde dehydrogenase, mitochondrial	ALDH2	sp|P05091|ALDH2_HUMAN Aldehyde dehydrogenase, mitochondrial OS=Homo sapiens GN=ALDH2 PE=1 SV=2	56381	0	61803	873110	1421300	1163300
P05362;K7EKL8;E7ESS4	P05362;K7EKL8;E7ESS4	Intercellular adhesion molecule 1	ICAM1	sp|P05362|ICAM1_HUMAN Intercellular adhesion molecule 1 OS=Homo sapiens GN=ICAM1 PE=1 SV=2;tr|K7EKL8|K7EKL8_HUMAN Intercellular adhesion molecule 1 (Fragment) OS=Homo sapiens GN=ICAM1 PE=1 SV=1;tr|E7ESS4|E7ESS4_HUMAN Intercellular adhesion molecule 1 OS=Ho	57825	0	38404	331050	0	0
P05386	P05386	60S acidic ribosomal protein P1	RPLP1	sp|P05386|RLA1_HUMAN 60S acidic ribosomal protein P1 OS=Homo sapiens GN=RPLP1 PE=1 SV=1	11514	0	71573	0	0	117680
P05388;F8VWS0;F8VW21;F8VU65;F8VPE8;G3V210;F8VZS0;Q8NHW5;F8VS58;F8VQY6;F8VRK7;F8VWV4;F8W1K8	P05388;F8VWS0;F8VW21;F8VU65;F8VPE8;G3V210;F8VZS0;Q8NHW5;F8VS58;F8VQY6;F8VRK7	60S acidic ribosomal protein P0;60S acidic ribosomal protein P0-like	RPLP0;RPLP0P6	sp|P05388|RLA0_HUMAN 60S acidic ribosomal protein P0 OS=Homo sapiens GN=RPLP0 PE=1 SV=1;tr|F8VWS0|F8VWS0_HUMAN 60S acidic ribosomal protein P0 OS=Homo sapiens GN=RPLP0 PE=1 SV=1;tr|F8VW21|F8VW21_HUMAN 60S acidic ribosomal protein P0 (Fragment) OS=Homo sapi	34273	0	114.55	1158200	2404400	2847400
S4R371;P05413;S4R3A2	S4R371;P05413;S4R3A2	Fatty acid-binding protein, heart	FABP3	tr|S4R371|S4R371_HUMAN Fatty acid-binding protein, heart (Fragment) OS=Homo sapiens GN=FABP3 PE=1 SV=1;sp|P05413|FABPH_HUMAN Fatty acid-binding protein, heart OS=Homo sapiens GN=FABP3 PE=1 SV=4;tr|S4R3A2|S4R3A2_HUMAN Fatty acid-binding protein, heart OS=Ho	14787	0	95889	2228500	466400	1100300
P05556;C9JPK5;Q5T3E6;E9PLR6;E7EUI6;E7EQW5;E7ERX5	P05556	Integrin beta-1	ITGB1	sp|P05556|ITB1_HUMAN Integrin beta-1 OS=Homo sapiens GN=ITGB1 PE=1 SV=2	88414	0	25793	3333700	677850	592920
P06576;H0YH81;F8W079;H0YI37	P06576;H0YH81;F8W079	ATP synthase subunit beta, mitochondrial;ATP synthase subunit beta	ATP5B	sp|P06576|ATPB_HUMAN ATP synthase subunit beta, mitochondrial OS=Homo sapiens GN=ATP5B PE=1 SV=3;tr|H0YH81|H0YH81_HUMAN ATP synthase subunit beta (Fragment) OS=Homo sapiens GN=ATP5B PE=1 SV=1;tr|F8W079|F8W079_HUMAN ATP synthase subunit beta, mitochondrial	56559	0	292.08	41803000	46237000	22651000
P06702	P06702	Protein S100-A9	S100A9	sp|P06702|S10A9_HUMAN Protein S100-A9 OS=Homo sapiens GN=S100A9 PE=1 SV=1	13242	0	44342	788460	25548	44679
P06732	P06732	Creatine kinase M-type;Creatine kinase M-type, N-terminally processed	CKM	sp|P06732|KCRM_HUMAN Creatine kinase M-type OS=Homo sapiens GN=CKM PE=1 SV=2	43101	0	220.07	31428000	22025000	18709000
P06733;K7EM90;F5H1C3;F5H0C8;P09104	P06733;K7EM90	Alpha-enolase;Enolase	ENO1	sp|P06733|ENOA_HUMAN Alpha-enolase OS=Homo sapiens GN=ENO1 PE=1 SV=2;tr|K7EM90|K7EM90_HUMAN Alpha-enolase (Fragment) OS=Homo sapiens GN=ENO1 PE=1 SV=1	47168	0	315.3	11320000	11901000	5754900
P06756;H7BZG1	P06756	Integrin alpha-V;Integrin alpha-V heavy chain;Integrin alpha-V light chain	ITGAV	sp|P06756|ITAV_HUMAN Integrin alpha-V OS=Homo sapiens GN=ITGAV PE=1 SV=2	116.04	0	53517	0	72149	60350
Q8N257;Q16778;P33778;P23527;P06899;Q96A08;Q6DRA6;Q6DN03	Q8N257;Q16778;P33778;P23527;P06899	Histone H2B type 3-B;Histone H2B type 2-E;Histone H2B type 1-B;Histone H2B type 1-O;Histone H2B type 1-J	HIST3H2BB;HIST2H2BE;HIST1H2BB;HIST1H2BO;HIST1H2BJ	sp|Q8N257|H2B3B_HUMAN Histone H2B type 3-B OS=Homo sapiens GN=HIST3H2BB PE=1 SV=3;sp|Q16778|H2B2E_HUMAN Histone H2B type 2-E OS=Homo sapiens GN=HIST2H2BE PE=1 SV=3;sp|P33778|H2B1B_HUMAN Histone H2B type 1-B OS=Homo sapiens GN=HIST1H2BB PE=1 SV=2;sp|P23527|	13908	0	19631	7550200	2879900	5337400
P07099	P07099	Epoxide hydrolase 1	EPHX1	sp|P07099|HYEP_HUMAN Epoxide hydrolase 1 OS=Homo sapiens GN=EPHX1 PE=1 SV=1	52948	0	51453	1003500	117600	64014
P07195;C9J7H8;A8MW50;F5H793	P07195;C9J7H8;A8MW50	L-lactate dehydrogenase B chain;L-lactate dehydrogenase	LDHB	sp|P07195|LDHB_HUMAN L-lactate dehydrogenase B chain OS=Homo sapiens GN=LDHB PE=1 SV=2;tr|C9J7H8|C9J7H8_HUMAN L-lactate dehydrogenase B chain (Fragment) OS=Homo sapiens GN=LDHB PE=1 SV=7;tr|A8MW50|A8MW50_HUMAN L-lactate dehydrogenase (Fragment) OS=Homo sap	36638	0	53245	2928100	2337800	2010400
P07205	P07205	Phosphoglycerate kinase 2	PGK2	sp|P07205|PGK2_HUMAN Phosphoglycerate kinase 2 OS=Homo sapiens GN=PGK2 PE=1 SV=3	44796	0	84435	0	0	69265
P07339;F8WD96;C9JH19;H7C1V0;H7C469;F8W787	P07339;F8WD96;C9JH19	Cathepsin D;Cathepsin D light chain;Cathepsin D heavy chain	CTSD	sp|P07339|CATD_HUMAN Cathepsin D OS=Homo sapiens GN=CTSD PE=1 SV=1;tr|F8WD96|F8WD96_HUMAN Cathepsin D OS=Homo sapiens GN=CTSD PE=1 SV=1;tr|C9JH19|C9JH19_HUMAN Cathepsin D (Fragment) OS=Homo sapiens GN=CTSD PE=1 SV=1	44552	0	104.57	4100800	5526400	4637800
P07355;H0YN42;H0YMD0;H0YMU9;A6NMY6;H0YM50;H0YKS4;H0YN28;H0YL33;H0YNP5;H0YMM1;H0YNA0;H0YKZ7;H0YLV6;H0YMT9;H0YKX9;H0YMW4;H0YKL9;H0YN52;H0YKV8;H0YMD9;H0YNB8;H0YKN4;H0YLE2	P07355;H0YN42;H0YMD0;H0YMU9;A6NMY6;H0YM50;H0YKS4;H0YN28;H0YL33;H0YNP5	Annexin A2;Annexin;Putative annexin A2-like protein	ANXA2;ANXA2P2	sp|P07355|ANXA2_HUMAN Annexin A2 OS=Homo sapiens GN=ANXA2 PE=1 SV=2;tr|H0YN42|H0YN42_HUMAN Annexin (Fragment) OS=Homo sapiens GN=ANXA2 PE=1 SV=1;tr|H0YMD0|H0YMD0_HUMAN Annexin (Fragment) OS=Homo sapiens GN=ANXA2 PE=1 SV=1;tr|H0YMU9|H0YMU9_HUMAN Annexin OS=	38604	0	263.21	103960000	15826000	25056000
P07384;E9PL37;E9PRM1;E9PLX0;E9PJJ3;E9PLC9;E9PMC6;E9PJA6;E9PSA6;E9PQB3;E9PIA9	P07384	Calpain-1 catalytic subunit	CAPN1	sp|P07384|CAN1_HUMAN Calpain-1 catalytic subunit OS=Homo sapiens GN=CAPN1 PE=1 SV=1	81889	0	32716	1515100	654660	661150
Q5JP53;P07437;Q5ST81;A0A075B736;Q5SQY0;A6NNZ2;G3V2A3;CON__ENSEMBL:ENSBTAP00000025008;Q9H4B7;M0R2D3;G3V5W4;G3V2R8;M0R042;G3V3R4;M0QYM7;G3V2N6	Q5JP53;P07437;Q5ST81	Tubulin beta chain	TUBB	tr|Q5JP53|Q5JP53_HUMAN Tubulin beta chain OS=Homo sapiens GN=TUBB PE=1 SV=1;sp|P07437|TBB5_HUMAN Tubulin beta chain OS=Homo sapiens GN=TUBB PE=1 SV=2;tr|Q5ST81|Q5ST81_HUMAN Tubulin beta chain OS=Homo sapiens GN=TUBB PE=1 SV=1	47766	0	253.1	15843000	10078000	11156000
P07737;K7EJ44;I3L3D5;CON__P02584	P07737;K7EJ44	Profilin-1	PFN1	sp|P07737|PROF1_HUMAN Profilin-1 OS=Homo sapiens GN=PFN1 PE=1 SV=2;tr|K7EJ44|K7EJ44_HUMAN Profilin OS=Homo sapiens GN=PFN1 PE=1 SV=1	15054	0	128.46	1460800	2342500	3973500
P07741;H3BQF1;H3BQZ9;H3BQB1;H3BSW3	P07741;H3BQF1;H3BQZ9;H3BQB1;H3BSW3	Adenine phosphoribosyltransferase	APRT	sp|P07741|APT_HUMAN Adenine phosphoribosyltransferase OS=Homo sapiens GN=APRT PE=1 SV=2;tr|H3BQF1|H3BQF1_HUMAN Adenine phosphoribosyltransferase (Fragment) OS=Homo sapiens GN=APRT PE=1 SV=7;tr|H3BQZ9|H3BQZ9_HUMAN Adenine phosphoribosyltransferase OS=Homo s	19608	0	73212	374400	1705900	1102100
P07814;V9GYZ6	P07814;V9GYZ6	Bifunctional glutamate/proline--tRNA ligase;Glutamate--tRNA ligase;Proline--tRNA ligase	EPRS	sp|P07814|SYEP_HUMAN Bifunctional glutamate/proline--tRNA ligase OS=Homo sapiens GN=EPRS PE=1 SV=5;tr|V9GYZ6|V9GYZ6_HUMAN Bifunctional glutamate/proline--tRNA ligase (Fragment) OS=Homo sapiens GN=EPRS PE=1 SV=1	170.59	0	13157	277020	578460	308980
P07858	P07858	Cathepsin B;Cathepsin B light chain;Cathepsin B heavy chain	CTSB	sp|P07858|CATB_HUMAN Cathepsin B OS=Homo sapiens GN=CTSB PE=1 SV=3	37821	0	2551	0	0	13819
P07900;G3V2J8;Q14568;Q58FF6;Q58FG0;Q58FG1	P07900	Heat shock protein HSP 90-alpha	HSP90AA1	sp|P07900|HS90A_HUMAN Heat shock protein HSP 90-alpha OS=Homo sapiens GN=HSP90AA1 PE=1 SV=5	84659	0	193.79	23033000	14243000	10024000
P07954	P07954	Fumarate hydratase, mitochondrial	FH	sp|P07954|FUMH_HUMAN Fumarate hydratase, mitochondrial OS=Homo sapiens GN=FH PE=1 SV=3	54636	0	46096	319970	142630	54048
P08133;E7EMC6;E5RK63;E5RJF5;E5RFF0;E5RI05;E5RIU8;E5RJR0;H0YC77	P08133;E7EMC6	Annexin A6;Annexin	ANXA6	sp|P08133|ANXA6_HUMAN Annexin A6 OS=Homo sapiens GN=ANXA6 PE=1 SV=3;tr|E7EMC6|E7EMC6_HUMAN Annexin OS=Homo sapiens GN=ANXA6 PE=1 SV=1	75872	0	323.31	45765000	12826000	13853000
P08237;F8VX13;F8VNX2;F8VZQ1;F8VP00;F8VW30;F8VSL1;F8VZI0;F8W1J8;F8VSF7;F8VUB8;F8VTQ3;F8VYK8;F8VVE3;H0YHB8	P08237	ATP-dependent 6-phosphofructokinase, muscle type	PFKM	sp|P08237|PFKAM_HUMAN ATP-dependent 6-phosphofructokinase, muscle type OS=Homo sapiens GN=PFKM PE=1 SV=2	85182	0	323.31	25252000	65031000	53830000
P08238;Q58FF7	P08238	Heat shock protein HSP 90-beta	HSP90AB1	sp|P08238|HS90B_HUMAN Heat shock protein HSP 90-beta OS=Homo sapiens GN=HSP90AB1 PE=1 SV=4	83263	0	110.09	9147700	5480300	5519400
P08514	P08514	Integrin alpha-IIb;Integrin alpha-IIb heavy chain;Integrin alpha-IIb light chain, form 1;Integrin alpha-IIb light chain, form 2	ITGA2B	sp|P08514|ITA2B_HUMAN Integrin alpha-IIb OS=Homo sapiens GN=ITGA2B PE=1 SV=3	113.38	0	37378	484800	0	0
P08559;Q5JPU0;Q5JPT9;Q5JPU1;P29803;Q5JPU3;Q5JPU2	P08559	Pyruvate dehydrogenase E1 component subunit alpha, somatic form, mitochondrial	PDHA1	sp|P08559|ODPA_HUMAN Pyruvate dehydrogenase E1 component subunit alpha, somatic form, mitochondrial OS=Homo sapiens GN=PDHA1 PE=1 SV=3	43295	0	71188	502200	629490	617720
P08590;E9PGV7	P08590	Myosin light chain 3	MYL3	sp|P08590|MYL3_HUMAN Myosin light chain 3 OS=Homo sapiens GN=MYL3 PE=1 SV=3	21932	0	34072	6365400	2086400	2487300
P08754	P08754	Guanine nucleotide-binding protein G(k) subunit alpha	GNAI3	sp|P08754|GNAI3_HUMAN Guanine nucleotide-binding protein G(k) subunit alpha OS=Homo sapiens GN=GNAI3 PE=1 SV=3	40532	0	31836	427960	0	0
P08758;D6RBL5;D6RBE9;E9PHT9;D6RCN3	P08758;D6RBL5;D6RBE9	Annexin A5;Annexin	ANXA5	sp|P08758|ANXA5_HUMAN Annexin A5 OS=Homo sapiens GN=ANXA5 PE=1 SV=2;tr|D6RBL5|D6RBL5_HUMAN Annexin OS=Homo sapiens GN=ANXA5 PE=1 SV=1;tr|D6RBE9|D6RBE9_HUMAN Annexin OS=Homo sapiens GN=ANXA5 PE=1 SV=1	35936	0	197.88	23510000	6090100	10900000
P09211;A8MX94;A0A087X2E9;A0A087X243	P09211;A8MX94	Glutathione S-transferase P	GSTP1	sp|P09211|GSTP1_HUMAN Glutathione S-transferase P OS=Homo sapiens GN=GSTP1 PE=1 SV=2;tr|A8MX94|A8MX94_HUMAN Glutathione S-transferase P OS=Homo sapiens GN=GSTP1 PE=1 SV=1	23356	0	251.5	1420500	6168700	11399000
P09382	P09382	Galectin-1	LGALS1	sp|P09382|LEG1_HUMAN Galectin-1 OS=Homo sapiens GN=LGALS1 PE=1 SV=2	14716	0	38261	1774000	929920	1834000
P09417;B7Z415;D6RGG7;H0Y8F7;D6RHJ7	P09417;B7Z415;D6RGG7	Dihydropteridine reductase	QDPR	sp|P09417|DHPR_HUMAN Dihydropteridine reductase OS=Homo sapiens GN=QDPR PE=1 SV=2;tr|B7Z415|B7Z415_HUMAN Dihydropteridine reductase OS=Homo sapiens GN=QDPR PE=1 SV=1;tr|D6RGG7|D6RGG7_HUMAN Dihydropteridine reductase OS=Homo sapiens GN=QDPR PE=1 SV=1	25789	0	135.33	434840	1186900	808450
P09471;H3BTM2	P09471;H3BTM2	Guanine nucleotide-binding protein G(o) subunit alpha	GNAO1	sp|P09471|GNAO_HUMAN Guanine nucleotide-binding protein G(o) subunit alpha OS=Homo sapiens GN=GNAO1 PE=1 SV=4;tr|H3BTM2|H3BTM2_HUMAN Guanine nucleotide-binding protein G(o) subunit alpha (Fragment) OS=Homo sapiens GN=GNAO1 PE=1 SV=1	40.05	0	8193	1122500	171000	251670
P09488;E7EWW9	P09488;E7EWW9	Glutathione S-transferase Mu 1	GSTM1	sp|P09488|GSTM1_HUMAN Glutathione S-transferase Mu 1 OS=Homo sapiens GN=GSTM1 PE=1 SV=3;tr|E7EWW9|E7EWW9_HUMAN Glutathione S-transferase Mu 1 OS=Homo sapiens GN=GSTM1 PE=1 SV=1	25712	0	55281	0	100380	933930
Q6P452;P09525;B4E1S2	Q6P452;P09525	Annexin;Annexin A4	ANXA4	tr|Q6P452|Q6P452_HUMAN Annexin OS=Homo sapiens GN=ANXA4 PE=1 SV=1;sp|P09525|ANXA4_HUMAN Annexin A4 OS=Homo sapiens GN=ANXA4 PE=1 SV=4	33552	0	90522	8600600	1130600	2295500
P09619;E5RJ14;E5RH16	P09619	Platelet-derived growth factor receptor beta	PDGFRB	sp|P09619|PGFRB_HUMAN Platelet-derived growth factor receptor beta OS=Homo sapiens GN=PDGFRB PE=1 SV=1	123.97	0	49703	776340	0	0
P09874	P09874	Poly [ADP-ribose] polymerase 1	PARP1	sp|P09874|PARP1_HUMAN Poly [ADP-ribose] polymerase 1 OS=Homo sapiens GN=PARP1 PE=1 SV=4	113.08	0	30794	0	0	73244
P09960	P09960	Leukotriene A-4 hydrolase	LTA4H	sp|P09960|LKHA4_HUMAN Leukotriene A-4 hydrolase OS=Homo sapiens GN=LTA4H PE=1 SV=2	69284	0	45184	0	41494	88846
P09972;A8MVZ9;J3KSV6;J3QKP5;C9J8F3;J3QKK1;K7EKH5;A0A087WXX2;P05062	P09972;A8MVZ9;J3KSV6;J3QKP5;C9J8F3	Fructose-bisphosphate aldolase C;Fructose-bisphosphate aldolase	ALDOC	sp|P09972|ALDOC_HUMAN Fructose-bisphosphate aldolase C OS=Homo sapiens GN=ALDOC PE=1 SV=2;tr|A8MVZ9|A8MVZ9_HUMAN Fructose-bisphosphate aldolase OS=Homo sapiens GN=ALDOC PE=1 SV=1;tr|J3KSV6|J3KSV6_HUMAN Fructose-bisphosphate aldolase C (Fragment) OS=Homo sa	39455	0	226.36	6776400	9452800	5679400
P47985;P0C7P4	P47985;P0C7P4	Cytochrome b-c1 complex subunit Rieske, mitochondrial;Cytochrome b-c1 complex subunit 11;Putative cytochrome b-c1 complex subunit Rieske-like protein 1	UQCRFS1;UQCRFS1P1	sp|P47985|UCRI_HUMAN Cytochrome b-c1 complex subunit Rieske, mitochondrial OS=Homo sapiens GN=UQCRFS1 PE=1 SV=2;sp|P0C7P4|UCRIL_HUMAN Putative cytochrome b-c1 complex subunit Rieske-like protein 1 OS=Homo sapiens GN=UQCRFS1P1 PE=5 SV=1	29668	0	39217	0	134560	40793
P10155;H0Y9N5	P10155;H0Y9N5	60 kDa SS-A/Ro ribonucleoprotein	TROVE2	sp|P10155|RO60_HUMAN 60 kDa SS-A/Ro ribonucleoprotein OS=Homo sapiens GN=TROVE2 PE=1 SV=2;tr|H0Y9N5|H0Y9N5_HUMAN 60 kDa SS-A/Ro ribonucleoprotein (Fragment) OS=Homo sapiens GN=TROVE2 PE=1 SV=7	60.67	0	40391	0	61948	74093
P10301	P10301	Ras-related protein R-Ras	RRAS	sp|P10301|RRAS_HUMAN Ras-related protein R-Ras OS=Homo sapiens GN=RRAS PE=1 SV=1	23.48	0	60634	1606500	1224800	1887000
Q29940;P30685;P30498;P30495;P30493;P30492;P30491;P30490;P30484;P30464;P18465;P18464;P10319	Q29940;P30685;P30498;P30495;P30493;P30492;P30491;P30490;P30484;P30464;P18465;P18464;P10319	HLA class I histocompatibility antigen, B-59 alpha chain;HLA class I histocompatibility antigen, B-35 alpha chain;HLA class I histocompatibility antigen, B-78 alpha chain;HLA class I histocompatibility antigen, B-56 alpha chain;HLA class I histocompatibility antigen, B-55 alpha chain;HLA class I histocompatibility antigen, B-54 alpha chain;HLA class I histocompatibility antigen, B-53 alpha chain;…	HLA-B	sp|Q29940|1B59_HUMAN HLA class I histocompatibility antigen, B-59 alpha chain OS=Homo sapiens GN=HLA-B PE=1 SV=1;sp|P30685|1B35_HUMAN HLA class I histocompatibility antigen, B-35 alpha chain OS=Homo sapiens GN=HLA-B PE=1 SV=1;sp|P30498|1B78_HUMAN HLA class	40584	0	22625	0	0	127870
P16403;P10412;P16402;P22492;Q02539	P16403;P10412;P16402	Histone H1.2;Histone H1.4;Histone H1.3	HIST1H1C;HIST1H1E;HIST1H1D	sp|P16403|H12_HUMAN Histone H1.2 OS=Homo sapiens GN=HIST1H1C PE=1 SV=2;sp|P10412|H14_HUMAN Histone H1.4 OS=Homo sapiens GN=HIST1H1E PE=1 SV=2;sp|P16402|H13_HUMAN Histone H1.3 OS=Homo sapiens GN=HIST1H1D PE=1 SV=2	21364	0	48756	2728200	0	0
P10599	P10599	Thioredoxin	TXN	sp|P10599|THIO_HUMAN Thioredoxin OS=Homo sapiens GN=TXN PE=1 SV=3	11737	0.00090662	24858	0	0	111580
P10606	P10606	Cytochrome c oxidase subunit 5B, mitochondrial	COX5B	sp|P10606|COX5B_HUMAN Cytochrome c oxidase subunit 5B, mitochondrial OS=Homo sapiens GN=COX5B PE=1 SV=2	13696	0.004886	15828	0	0	72026
P10644;K7EPB2;K7EM13;K7EIE5;K7EID3;K7EJ40;K7EK41;K7EKR1;K7EMZ6;K7EMU2;K7EPR5;K7EQK3;X6RAV4	P10644;K7EPB2;K7EM13	cAMP-dependent protein kinase type I-alpha regulatory subunit;cAMP-dependent protein kinase type I-alpha regulatory subunit, N-terminally processed	PRKAR1A	sp|P10644|KAP0_HUMAN cAMP-dependent protein kinase type I-alpha regulatory subunit OS=Homo sapiens GN=PRKAR1A PE=1 SV=1;tr|K7EPB2|K7EPB2_HUMAN cAMP-dependent protein kinase type I-alpha regulatory subunit (Fragment) OS=Homo sapiens GN=PRKAR1A PE=1 SV=1;tr|	42981	0	183.5	6848600	7074500	8623900
X6RA14;P10768;H7BZT7;U3KQT1	X6RA14;P10768;H7BZT7	S-formylglutathione hydrolase	ESD	tr|X6RA14|X6RA14_HUMAN S-formylglutathione hydrolase OS=Homo sapiens GN=ESD PE=1 SV=1;sp|P10768|ESTD_HUMAN S-formylglutathione hydrolase OS=Homo sapiens GN=ESD PE=1 SV=2;tr|H7BZT7|H7BZT7_HUMAN S-formylglutathione hydrolase (Fragment) OS=Homo sapiens GN=ESD	28226	0	52605	1996600	3337200	2371700
P10909;H0YAS8;H0YC35;E7ERK6;H0YLK8	P10909;H0YAS8;H0YC35	Clusterin;Clusterin beta chain;Clusterin alpha chain;Clusterin	CLU	sp|P10909|CLUS_HUMAN Clusterin OS=Homo sapiens GN=CLU PE=1 SV=1;tr|H0YAS8|H0YAS8_HUMAN Clusterin (Fragment) OS=Homo sapiens GN=CLU PE=1 SV=1;tr|H0YC35|H0YC35_HUMAN Clusterin (Fragment) OS=Homo sapiens GN=CLU PE=1 SV=1	52494	0	33.19	108170	538110	776040
P10916;G3V1V8;Q9BUA6	P10916;G3V1V8	Myosin regulatory light chain 2, ventricular/cardiac muscle isoform	MYL2	sp|P10916|MLRV_HUMAN Myosin regulatory light chain 2, ventricular/cardiac muscle isoform OS=Homo sapiens GN=MYL2 PE=1 SV=3;tr|G3V1V8|G3V1V8_HUMAN Myosin regulatory light chain 2, ventricular/cardiac muscle isoform OS=Homo sapiens GN=MYL2 PE=1 SV=1	18789	0	26.83	1578800	365530	699100
P11021	P11021	78 kDa glucose-regulated protein	HSPA5	sp|P11021|GRP78_HUMAN 78 kDa glucose-regulated protein OS=Homo sapiens GN=HSPA5 PE=1 SV=2	72332	0	22527	1648000	565490	203790
P11047	P11047	Laminin subunit gamma-1	LAMC1	sp|P11047|LAMC1_HUMAN Laminin subunit gamma-1 OS=Homo sapiens GN=LAMC1 PE=1 SV=3	177.6	0	18851	645270	234150	0
P11055;A0A087X0T3;A7E2Y1;J3QLR0	P11055	Myosin-3	MYH3	sp|P11055|MYH3_HUMAN Myosin-3 OS=Homo sapiens GN=MYH3 PE=1 SV=3	223.9	0.0025274	18817	0	0	91752
P11142;E9PKE3;E9PN89;E9PNE6;A8K7Q2;E9PLF4;E9PQQ4;E9PQK7;E9PK54;E9PPY6;E9PI65;E9PN25;E9PS65;E9PM13	P11142;E9PKE3;E9PN89;E9PNE6;A8K7Q2	Heat shock cognate 71 kDa protein	HSPA8	sp|P11142|HSP7C_HUMAN Heat shock cognate 71 kDa protein OS=Homo sapiens GN=HSPA8 PE=1 SV=1;tr|E9PKE3|E9PKE3_HUMAN Heat shock cognate 71 kDa protein OS=Homo sapiens GN=HSPA8 PE=1 SV=1;tr|E9PN89|E9PN89_HUMAN Heat shock cognate 71 kDa protein (Fragment) OS=Ho	70897	0	286.98	51607000	58804000	33494000
P11166	P11166	Solute carrier family 2, facilitated glucose transporter member 1	SLC2A1	sp|P11166|GTR1_HUMAN Solute carrier family 2, facilitated glucose transporter member 1 OS=Homo sapiens GN=SLC2A1 PE=1 SV=2	54083	0.0025316	19048	0	0	7212.2
P11177;F8WF02;C9J634	P11177;F8WF02;C9J634	Pyruvate dehydrogenase E1 component subunit beta, mitochondrial	PDHB	sp|P11177|ODPB_HUMAN Pyruvate dehydrogenase E1 component subunit beta, mitochondrial OS=Homo sapiens GN=PDHB PE=1 SV=3;tr|F8WF02|F8WF02_HUMAN Pyruvate dehydrogenase E1 component subunit beta, mitochondrial OS=Homo sapiens GN=PDHB PE=1 SV=1;tr|C9J634|C9J634	39233	0	60445	233420	578310	340110
P11216;H0Y4Z6	P11216	Glycogen phosphorylase, brain form	PYGB	sp|P11216|PYGB_HUMAN Glycogen phosphorylase, brain form OS=Homo sapiens GN=PYGB PE=1 SV=5	96695	0	323.31	40100000	48584000	66675000
P11217	P11217	Glycogen phosphorylase, muscle form	PYGM	sp|P11217|PYGM_HUMAN Glycogen phosphorylase, muscle form OS=Homo sapiens GN=PYGM PE=1 SV=6	97091	0	323.31	83455000	60667000	64074000
P11277	P11277	Spectrin beta chain, erythrocytic	SPTB	sp|P11277|SPTB1_HUMAN Spectrin beta chain, erythrocytic OS=Homo sapiens GN=SPTB PE=1 SV=5	246.47	0.0056452	15267	0	0	7706.2
P11279	P11279	Lysosome-associated membrane glycoprotein 1	LAMP1	sp|P11279|LAMP1_HUMAN Lysosome-associated membrane glycoprotein 1 OS=Homo sapiens GN=LAMP1 PE=1 SV=3	44882	0	13535	0	32772	0
P11532;E9PDN5;A0A075B6G3;A0A087WV90;A0A087WTU7;Q4G0X0;H0Y304;F5GZY3;E7EQS5;F8VX32;E7ESB2;E7EQR9;Q14174;Q14172;H0Y3E8;P46939	P11532;E9PDN5;A0A075B6G3;A0A087WV90;A0A087WTU7	Dystrophin	DMD	sp|P11532|DMD_HUMAN Dystrophin OS=Homo sapiens GN=DMD PE=1 SV=3;tr|E9PDN5|E9PDN5_HUMAN Dystrophin OS=Homo sapiens GN=DMD PE=1 SV=1;tr|A0A075B6G3|A0A075B6G3_HUMAN Dystrophin OS=Homo sapiens GN=DMD PE=1 SV=1;tr|A0A087WV90|A0A087WV90_HUMAN Dystrophin OS=Homo	426.74	0	134.25	1471400	3765700	3374900
P11766;H0YAG8;D6RAY0;D6R9G2;D6RFE4	P11766;H0YAG8	Alcohol dehydrogenase class-3	ADH5	sp|P11766|ADHX_HUMAN Alcohol dehydrogenase class-3 OS=Homo sapiens GN=ADH5 PE=1 SV=4;tr|H0YAG8|H0YAG8_HUMAN Alcohol dehydrogenase class-3 (Fragment) OS=Homo sapiens GN=ADH5 PE=1 SV=1	39724	0	33171	1229500	3609600	2577800
P60891;P11908;B7ZB02;H7C540;B1ALA9;A0A0B4J207;P21108;A6NMS2;B1ALA7;D3YTJ7	P60891;P11908;B7ZB02;H7C540;B1ALA9;A0A0B4J207;P21108	Ribose-phosphate pyrophosphokinase 1;Ribose-phosphate pyrophosphokinase 2;Ribose-phosphate pyrophosphokinase 3	PRPS1;PRPS2;PRPS1L1	sp|P60891|PRPS1_HUMAN Ribose-phosphate pyrophosphokinase 1 OS=Homo sapiens GN=PRPS1 PE=1 SV=2;sp|P11908|PRPS2_HUMAN Ribose-phosphate pyrophosphokinase 2 OS=Homo sapiens GN=PRPS2 PE=1 SV=2;tr|B7ZB02|B7ZB02_HUMAN Ribose-phosphate pyrophosphokinase 1 OS=Homo	34834	0	10503	0	189120	230040
V9GYG0;P12235;P12236;P05141;Q9H0C2	V9GYG0;P12235;P12236	ADP/ATP translocase 1;ADP/ATP translocase 3;ADP/ATP translocase 3, N-terminally processed	SLC25A4;SLC25A6	tr|V9GYG0|V9GYG0_HUMAN ADP/ATP translocase 1 OS=Homo sapiens GN=SLC25A4 PE=1 SV=1;sp|P12235|ADT1_HUMAN ADP/ATP translocase 1 OS=Homo sapiens GN=SLC25A4 PE=1 SV=4;sp|P12236|ADT3_HUMAN ADP/ATP translocase 3 OS=Homo sapiens GN=SLC25A6 PE=1 SV=4	22885	0	27273	2777900	1864300	1130300
P12273	P12273	Prolactin-inducible protein	PIP	sp|P12273|PIP_HUMAN Prolactin-inducible protein OS=Homo sapiens GN=PIP PE=1 SV=1	16572	0	21668	362560	339490	616640
P12277;H0YJG0;G3V4N7;G3V461;H0YJK0	P12277;H0YJG0;G3V4N7	Creatine kinase B-type	CKB	sp|P12277|KCRB_HUMAN Creatine kinase B-type OS=Homo sapiens GN=CKB PE=1 SV=1;tr|H0YJG0|H0YJG0_HUMAN Creatine kinase B-type (Fragment) OS=Homo sapiens GN=CKB PE=1 SV=1;tr|G3V4N7|G3V4N7_HUMAN Creatine kinase B-type (Fragment) OS=Homo sapiens GN=CKB PE=1 SV=1	42644	0	139.57	1326300	2427400	2663000
P12814;H9KV75;G3V2N5;H7C5W8;G3V5M4;H0YJ11;G3V2W4;H0YJW3;G3V2X9;G3V380;G3V2E8;K7EJH8	P12814;H9KV75	Alpha-actinin-1	ACTN1	sp|P12814|ACTN1_HUMAN Alpha-actinin-1 OS=Homo sapiens GN=ACTN1 PE=1 SV=2;tr|H9KV75|H9KV75_HUMAN Alpha-actinin-1 OS=Homo sapiens GN=ACTN1 PE=1 SV=1	103.06	0	96263	2296300	766410	891620
P12882;P13535;Q9UKX2	P12882;P13535;Q9UKX2	Myosin-1;Myosin-8;Myosin-2	MYH1;MYH8;MYH2	sp|P12882|MYH1_HUMAN Myosin-1 OS=Homo sapiens GN=MYH1 PE=1 SV=3;sp|P13535|MYH8_HUMAN Myosin-8 OS=Homo sapiens GN=MYH8 PE=1 SV=3;sp|Q9UKX2|MYH2_HUMAN Myosin-2 OS=Homo sapiens GN=MYH2 PE=1 SV=1	223.14	0	89619	0	973850	0
P12883;Q9H6N6;Q9Y2K3	P12883	Myosin-7	MYH7	sp|P12883|MYH7_HUMAN Myosin-7 OS=Homo sapiens GN=MYH7 PE=1 SV=5	223.09	0	323.31	367570000	75475000	83573000
P12956;B1AHC9	P12956;B1AHC9	X-ray repair cross-complementing protein 6	XRCC6	sp|P12956|XRCC6_HUMAN X-ray repair cross-complementing protein 6 OS=Homo sapiens GN=XRCC6 PE=1 SV=2;tr|B1AHC9|B1AHC9_HUMAN X-ray repair cross-complementing protein 6 OS=Homo sapiens GN=XRCC6 PE=1 SV=1	69842	0	32.61	179090	434710	568890
P13010;C9JZ81;H7C0H9	P13010	X-ray repair cross-complementing protein 5	XRCC5	sp|P13010|XRCC5_HUMAN X-ray repair cross-complementing protein 5 OS=Homo sapiens GN=XRCC5 PE=1 SV=3	82704	0	29658	157980	752470	1078700
P13473	P13473	Lysosome-associated membrane glycoprotein 2	LAMP2	sp|P13473|LAMP2_HUMAN Lysosome-associated membrane glycoprotein 2 OS=Homo sapiens GN=LAMP2 PE=1 SV=2	44.96	0	42582	0	0	29186
P13489;E9PMJ3;E9PLZ3;E9PIM9;E9PMA9;E9PMN0;E9PIK5;H0YCR7	P13489;E9PMJ3;E9PLZ3;E9PIM9	Ribonuclease inhibitor	RNH1	sp|P13489|RINI_HUMAN Ribonuclease inhibitor OS=Homo sapiens GN=RNH1 PE=1 SV=2;tr|E9PMJ3|E9PMJ3_HUMAN Ribonuclease inhibitor (Fragment) OS=Homo sapiens GN=RNH1 PE=1 SV=1;tr|E9PLZ3|E9PLZ3_HUMAN Ribonuclease inhibitor (Fragment) OS=Homo sapiens GN=RNH1 PE=1 S	49973	0	46532	946490	1145600	1410400
P13533	P13533	Myosin-6	MYH6	sp|P13533|MYH6_HUMAN Myosin-6 OS=Homo sapiens GN=MYH6 PE=1 SV=5	223.73	0	168.48	2690400	8153800	10512000
P13639;K7EJ74;K7EP67	P13639	Elongation factor 2	EEF2	sp|P13639|EF2_HUMAN Elongation factor 2 OS=Homo sapiens GN=EEF2 PE=1 SV=4	95337	0	195.61	5425700	14976000	11547000
P13761;A0A140T958;A0A0G2JNX0;A0A0G2JMC5;A2BFX2;A0A0G2JP73;A0A0G2JNS5;A0A0G2JM55;Q9TQE0;Q30134;Q29974;P79483;P13760;P04229;A0A140TA30;A0A0G2JQ00;A0A140TA48;A0A0G2JPR5;Q9GIY3;Q30154	P13761;A0A140T958;A0A0G2JNX0;A0A0G2JMC5;A2BFX2;A0A0G2JP73;A0A0G2JNS5;A0A0G2JM55;Q9TQE0;Q30134;Q29974;P79483;P13760;P04229	HLA class II histocompatibility antigen, DRB1-7 beta chain;HLA class II histocompatibility antigen, DRB1-9 beta chain;HLA class II histocompatibility antigen, DRB1-8 beta chain;HLA class II histocompatibility antigen, DRB1-16 beta chain;HLA class II histocompatibility antigen, DR beta 3 chain;HLA class II histocompatibility antigen, DRB1-4 beta chain;HLA class II histocompatibility antigen, DRB1-…	HLA-DRB1;HLA-DRB3	sp|P13761|2B17_HUMAN HLA class II histocompatibility antigen, DRB1-7 beta chain OS=Homo sapiens GN=HLA-DRB1 PE=1 SV=1;tr|A0A140T958|A0A140T958_HUMAN HLA class II histocompatibility antigen, DRB1-16 beta chain (Fragment) OS=Homo sapiens GN=HLA-DRB1 PE=1 SV=	29822	0	5927	1046000	0	0
P13804;H0YL12;H0YLU7;H0YK49;H0YKF0;H0YNX6;H0YL83	P13804;H0YL12;H0YLU7;H0YK49;H0YKF0;H0YNX6	Electron transfer flavoprotein subunit alpha, mitochondrial	ETFA	sp|P13804|ETFA_HUMAN Electron transfer flavoprotein subunit alpha, mitochondrial OS=Homo sapiens GN=ETFA PE=1 SV=1;tr|H0YL12|H0YL12_HUMAN Electron transfer flavoprotein subunit alpha, mitochondrial (Fragment) OS=Homo sapiens GN=ETFA PE=1 SV=7;tr|H0YLU7|H0Y	35079	0	22262	150710	542820	513160
P13807;M0QYU1;P54840	P13807	Glycogen [starch] synthase, muscle	GYS1	sp|P13807|GYS1_HUMAN Glycogen [starch] synthase, muscle OS=Homo sapiens GN=GYS1 PE=1 SV=2	83785	0	136.13	5568800	7600300	13807000
P13861;H7C1L0;H7C4A9;H7C330;C9J830	P13861;H7C1L0	cAMP-dependent protein kinase type II-alpha regulatory subunit	PRKAR2A	sp|P13861|KAP2_HUMAN cAMP-dependent protein kinase type II-alpha regulatory subunit OS=Homo sapiens GN=PRKAR2A PE=1 SV=2;tr|H7C1L0|H7C1L0_HUMAN cAMP-dependent protein kinase type II-alpha regulatory subunit (Fragment) OS=Homo sapiens GN=PRKAR2A PE=1 SV=1	45518	0	152.89	744570	2089100	2087600
P14174	P14174	Macrophage migration inhibitory factor	MIF	sp|P14174|MIF_HUMAN Macrophage migration inhibitory factor OS=Homo sapiens GN=MIF PE=1 SV=4	12476	0	83798	0	0	1281500
P14324;A0A087WTP2;A0A087X1D8;A0A087X090;A0A087WVN4	P14324;A0A087WTP2;A0A087X1D8;A0A087X090;A0A087WVN4	Farnesyl pyrophosphate synthase	FDPS	sp|P14324|FPPS_HUMAN Farnesyl pyrophosphate synthase OS=Homo sapiens GN=FDPS PE=1 SV=4;tr|A0A087WTP2|A0A087WTP2_HUMAN Farnesyl pyrophosphate synthase OS=Homo sapiens GN=FDPS PE=1 SV=1;tr|A0A087X1D8|A0A087X1D8_HUMAN Farnesyl pyrophosphate synthase (Fragment	48275	0.002521	18564	0	0	426980
P14550;V9GYG2;V9GYP9;Q5T621	P14550	Alcohol dehydrogenase [NADP(+)]	AKR1A1	sp|P14550|AK1A1_HUMAN Alcohol dehydrogenase [NADP(+)] OS=Homo sapiens GN=AKR1A1 PE=1 SV=3	36573	0	90092	97096	601170	922870
P14618;B4DNK4	P14618;B4DNK4	Pyruvate kinase PKM;Pyruvate kinase	PKM	sp|P14618|KPYM_HUMAN Pyruvate kinase PKM OS=Homo sapiens GN=PKM PE=1 SV=4;tr|B4DNK4|B4DNK4_HUMAN Pyruvate kinase OS=Homo sapiens GN=PKM PE=1 SV=1	57936	0	323.31	53149000	89047000	63002000
P14625;F8W026;Q96GW1;Q58FF3	P14625;F8W026;Q96GW1	Endoplasmin	HSP90B1	sp|P14625|ENPL_HUMAN Endoplasmin OS=Homo sapiens GN=HSP90B1 PE=1 SV=1;tr|F8W026|F8W026_HUMAN Endoplasmin (Fragment) OS=Homo sapiens GN=HSP90B1 PE=1 SV=7;tr|Q96GW1|Q96GW1_HUMAN Endoplasmin OS=Homo sapiens GN=HSP90B1 PE=1 SV=1	92468	0	85943	678600	585860	165160
P14735	P14735	Insulin-degrading enzyme	IDE	sp|P14735|IDE_HUMAN Insulin-degrading enzyme OS=Homo sapiens GN=IDE PE=1 SV=4	117.97	0.00088106	22485	0	99051	0
P14868;H7BZ35;C9J7S3;C9JLC1;C9JQM9;H7C278	P14868	Aspartate--tRNA ligase, cytoplasmic	DARS	sp|P14868|SYDC_HUMAN Aspartate--tRNA ligase, cytoplasmic OS=Homo sapiens GN=DARS PE=1 SV=2	57136	0	51741	740040	1198000	1749000
P14923;C9JK18;C9JKY1;C9JTX4;C9J826	P14923	Junction plakoglobin	JUP	sp|P14923|PLAK_HUMAN Junction plakoglobin OS=Homo sapiens GN=JUP PE=1 SV=3	81744	0	171.33	6455500	5992600	11749000
P15121;E9PCX2;E9PEF9;C9JRZ8	P15121;E9PCX2	Aldose reductase	AKR1B1	sp|P15121|ALDR_HUMAN Aldose reductase OS=Homo sapiens GN=AKR1B1 PE=1 SV=3;tr|E9PCX2|E9PCX2_HUMAN Aldose reductase OS=Homo sapiens GN=AKR1B1 PE=1 SV=1	35853	0	110.86	2255100	15959000	11804000
P15259;Q8N0Y7	P15259	Phosphoglycerate mutase 2	PGAM2	sp|P15259|PGAM2_HUMAN Phosphoglycerate mutase 2 OS=Homo sapiens GN=PGAM2 PE=1 SV=3	28766	0	96545	0	260390	376350
P15880;H0YEN5;E9PQD7;E9PMM9;I3L404;E9PPT0;E9PM36;H3BNG3;H0YE27	P15880;H0YEN5;E9PQD7;E9PMM9;I3L404;E9PPT0	40S ribosomal protein S2	RPS2	sp|P15880|RS2_HUMAN 40S ribosomal protein S2 OS=Homo sapiens GN=RPS2 PE=1 SV=2;tr|H0YEN5|H0YEN5_HUMAN 40S ribosomal protein S2 (Fragment) OS=Homo sapiens GN=RPS2 PE=1 SV=1;tr|E9PQD7|E9PQD7_HUMAN 40S ribosomal protein S2 OS=Homo sapiens GN=RPS2 PE=1 SV=1;tr	31324	0	36381	2703300	1822800	1821200
P15924	P15924	Desmoplakin	DSP	sp|P15924|DESP_HUMAN Desmoplakin OS=Homo sapiens GN=DSP PE=1 SV=3	331.77	0	86292	3788800	429470	1164300
Q5TEJ7;P15927	Q5TEJ7;P15927	Replication protein A 32 kDa subunit	RPA2	tr|Q5TEJ7|Q5TEJ7_HUMAN Replication protein A 32 kDa subunit (Fragment) OS=Homo sapiens GN=RPA2 PE=1 SV=1;sp|P15927|RFA2_HUMAN Replication protein A 32 kDa subunit OS=Homo sapiens GN=RPA2 PE=1 SV=1	19433	0	21666	0	75318	121860
P16152;E9PQ63;A8MTM1	P16152;E9PQ63;A8MTM1	Carbonyl reductase [NADPH] 1	CBR1	sp|P16152|CBR1_HUMAN Carbonyl reductase [NADPH] 1 OS=Homo sapiens GN=CBR1 PE=1 SV=3;tr|E9PQ63|E9PQ63_HUMAN Carbonyl reductase [NADPH] 1 OS=Homo sapiens GN=CBR1 PE=1 SV=1;tr|A8MTM1|A8MTM1_HUMAN Carbonyl reductase [NADPH] 1 OS=Homo sapiens GN=CBR1 PE=1 SV=1	30375	0	122.86	895210	2036900	3072800
P16219;E9PE82	P16219;E9PE82	Short-chain specific acyl-CoA dehydrogenase, mitochondrial	ACADS	sp|P16219|ACADS_HUMAN Short-chain specific acyl-CoA dehydrogenase, mitochondrial OS=Homo sapiens GN=ACADS PE=1 SV=1;tr|E9PE82|E9PE82_HUMAN Short-chain-specific acyl-CoA dehydrogenase, mitochondrial OS=Homo sapiens GN=ACADS PE=1 SV=1	44297	0	73293	0	416310	162240
P16455	P16455	Methylated-DNA--protein-cysteine methyltransferase	MGMT	sp|P16455|MGMT_HUMAN Methylated-DNA--protein-cysteine methyltransferase OS=Homo sapiens GN=MGMT PE=1 SV=1	21646	0	7463	0	0	53589
P16615;H7C5W9;O14983;A0A0C4DH86;H3BVB2	P16615;H7C5W9;O14983	Sarcoplasmic/endoplasmic reticulum calcium ATPase 2;Sarcoplasmic/endoplasmic reticulum calcium ATPase 1	ATP2A2;ATP2A1	sp|P16615|AT2A2_HUMAN Sarcoplasmic/endoplasmic reticulum calcium ATPase 2 OS=Homo sapiens GN=ATP2A2 PE=1 SV=1;tr|H7C5W9|H7C5W9_HUMAN Sarcoplasmic/endoplasmic reticulum calcium ATPase 2 (Fragment) OS=Homo sapiens GN=ATP2A2 PE=1 SV=1;sp|O14983|AT2A1_HUMAN Sa	114.76	0	86418	2203800	1015100	967580
P17066;P48741	P17066;P48741	Heat shock 70 kDa protein 6;Putative heat shock 70 kDa protein 7	HSPA6;HSPA7	sp|P17066|HSP76_HUMAN Heat shock 70 kDa protein 6 OS=Homo sapiens GN=HSPA6 PE=1 SV=2;sp|P48741|HSP77_HUMAN Putative heat shock 70 kDa protein 7 OS=Homo sapiens GN=HSPA7 PE=5 SV=2	71027	0	7951	0	0	3709700
P17174	P17174	Aspartate aminotransferase, cytoplasmic	GOT1	sp|P17174|AATC_HUMAN Aspartate aminotransferase, cytoplasmic OS=Homo sapiens GN=GOT1 PE=1 SV=3	46247	0	15119	438280	189530	253440
P17540;D6R998;D6RHV3;P12532	P17540	Creatine kinase S-type, mitochondrial	CKMT2	sp|P17540|KCRS_HUMAN Creatine kinase S-type, mitochondrial OS=Homo sapiens GN=CKMT2 PE=1 SV=2	47504	0	166.53	11595000	11614000	4547200
P17612;K7ERP6;Q15136	P17612;K7ERP6	cAMP-dependent protein kinase catalytic subunit alpha	PRKACA	sp|P17612|KAPCA_HUMAN cAMP-dependent protein kinase catalytic subunit alpha OS=Homo sapiens GN=PRKACA PE=1 SV=2;tr|K7ERP6|K7ERP6_HUMAN cAMP-dependent protein kinase catalytic subunit alpha (Fragment) OS=Homo sapiens GN=PRKACA PE=1 SV=1	40589	0	45886	1614800	3294300	3686800
P17655;C9JWY7	P17655	Calpain-2 catalytic subunit	CAPN2	sp|P17655|CAN2_HUMAN Calpain-2 catalytic subunit OS=Homo sapiens GN=CAPN2 PE=1 SV=6	79994	0	14171	0	287510	250280
P17661;A0A087WYG8;E7EMV2;E7ESP9;Q16352;P07196;P07197;P12036	P17661	Desmin	DES	sp|P17661|DESM_HUMAN Desmin OS=Homo sapiens GN=DES PE=1 SV=3	53535	0	220.58	11643000	7635000	5013000
P17813;F5GX88	P17813	Endoglin	ENG	sp|P17813|EGLN_HUMAN Endoglin OS=Homo sapiens GN=ENG PE=1 SV=2	70577	0	14727	1505700	202200	269690
P17858	P17858	ATP-dependent 6-phosphofructokinase, liver type	PFKL	sp|P17858|PFKAL_HUMAN ATP-dependent 6-phosphofructokinase, liver type OS=Homo sapiens GN=PFKL PE=1 SV=6	85018	0	50439	168250	401210	1154500
P17987;E7ERF2;E7EQR6;F5H282;F5GZI8;F5H136;F5H726;F5H676;F5GYL4;F5H7Y1;F5GZ03	P17987;E7ERF2;E7EQR6	T-complex protein 1 subunit alpha	TCP1	sp|P17987|TCPA_HUMAN T-complex protein 1 subunit alpha OS=Homo sapiens GN=TCP1 PE=1 SV=1;tr|E7ERF2|E7ERF2_HUMAN T-complex protein 1 subunit alpha OS=Homo sapiens GN=TCP1 PE=1 SV=1;tr|E7EQR6|E7EQR6_HUMAN T-complex protein 1 subunit alpha OS=Homo sapiens GN=	60343	0	98089	1215500	1719300	979130
P18077;F8WBS5;F8WB72;C9K025	P18077;F8WBS5;F8WB72;C9K025	60S ribosomal protein L35a	RPL35A	sp|P18077|RL35A_HUMAN 60S ribosomal protein L35a OS=Homo sapiens GN=RPL35A PE=1 SV=2;tr|F8WBS5|F8WBS5_HUMAN 60S ribosomal protein L35a OS=Homo sapiens GN=RPL35A PE=1 SV=1;tr|F8WB72|F8WB72_HUMAN 60S ribosomal protein L35a OS=Homo sapiens GN=RPL35A PE=1 SV=1	12538	0.00089206	23453	0	163490	0
P18085;C9JPM4;C9JAK5;U3KQF2	P18085;C9JPM4;C9JAK5	ADP-ribosylation factor 4	ARF4	sp|P18085|ARF4_HUMAN ADP-ribosylation factor 4 OS=Homo sapiens GN=ARF4 PE=1 SV=3;tr|C9JPM4|C9JPM4_HUMAN ADP-ribosylation factor 4 (Fragment) OS=Homo sapiens GN=ARF4 PE=1 SV=1;tr|C9JAK5|C9JAK5_HUMAN ADP-ribosylation factor 4 OS=Homo sapiens GN=ARF4 PE=1 SV=	20511	0	46397	0	267420	480610
P18206;Q5JQ13	P18206;Q5JQ13	Vinculin	VCL	sp|P18206|VINC_HUMAN Vinculin OS=Homo sapiens GN=VCL PE=1 SV=4;tr|Q5JQ13|Q5JQ13_HUMAN Vinculin (Fragment) OS=Homo sapiens GN=VCL PE=1 SV=1	123.8	0	155.79	8978400	4021000	3544900
P18428	P18428	Lipopolysaccharide-binding protein	LBP	sp|P18428|LBP_HUMAN Lipopolysaccharide-binding protein OS=Homo sapiens GN=LBP PE=1 SV=3	53383	0	36125	0	594160	25242
P18669	P18669	Phosphoglycerate mutase 1	PGAM1	sp|P18669|PGAM1_HUMAN Phosphoglycerate mutase 1 OS=Homo sapiens GN=PGAM1 PE=1 SV=2	28804	0	39856	6091400	4340300	2700200
P19367;B1AR63;B1AR62;B1AR61;E9PB90;P52789;Q2TB90;P52790	P19367	Hexokinase-1	HK1	sp|P19367|HXK1_HUMAN Hexokinase-1 OS=Homo sapiens GN=HK1 PE=1 SV=3	102.48	0	221.58	6916800	10432000	10297000
P19623;K7EL89;K7EKM4;K7ESL0	P19623	Spermidine synthase	SRM	sp|P19623|SPEE_HUMAN Spermidine synthase OS=Homo sapiens GN=SRM PE=1 SV=1	33824	0	57037	0	143570	227910
P20073	P20073	Annexin A7	ANXA7	sp|P20073|ANXA7_HUMAN Annexin A7 OS=Homo sapiens GN=ANXA7 PE=1 SV=3	52739	0	26557	1667500	399230	488050
P61018;P20338;A0A087WYT5;M0R0X1	P61018;P20338;A0A087WYT5;M0R0X1	Ras-related protein Rab-4B;Ras-related protein Rab-4A	RAB4B;RAB4A	sp|P61018|RAB4B_HUMAN Ras-related protein Rab-4B OS=Homo sapiens GN=RAB4B PE=1 SV=1;sp|P20338|RAB4A_HUMAN Ras-related protein Rab-4A OS=Homo sapiens GN=RAB4A PE=1 SV=3;tr|A0A087WYT5|A0A087WYT5_HUMAN Ras-related protein Rab-4A OS=Homo sapiens GN=RAB4A PE=1	23586	0	81959	0	115900	321300
Q9NRW1;P20340;C9JB90;F5H3K7;C9J0I2;C9JU14;F5GX61;J3KR73;Q14964	Q9NRW1;P20340;C9JB90;F5H3K7;C9J0I2;C9JU14;F5GX61;J3KR73;Q14964	Ras-related protein Rab-6B;Ras-related protein Rab-6A;Ras-related protein Rab-39A	RAB6B;RAB6A;RAB39A	sp|Q9NRW1|RAB6B_HUMAN Ras-related protein Rab-6B OS=Homo sapiens GN=RAB6B PE=1 SV=1;sp|P20340|RAB6A_HUMAN Ras-related protein Rab-6A OS=Homo sapiens GN=RAB6A PE=1 SV=3;tr|C9JB90|C9JB90_HUMAN Ras-related protein Rab-6B (Fragment) OS=Homo sapiens GN=RAB6B PE	23461	0	21.42	0	640000	841810
P20774;Q5TBF5	P20774;Q5TBF5	Mimecan	OGN	sp|P20774|MIME_HUMAN Mimecan OS=Homo sapiens GN=OGN PE=1 SV=1;tr|Q5TBF5|Q5TBF5_HUMAN Mimecan (Fragment) OS=Homo sapiens GN=OGN PE=1 SV=1	33922	0	34757	1095100	625700	821060
P21283;E7EV59;A0A0U1RR16;Q8NEY4	P21283;E7EV59;A0A0U1RR16;Q8NEY4	V-type proton ATPase subunit C 1;V-type proton ATPase subunit C 2	ATP6V1C1;ATP6V1C2	sp|P21283|VATC1_HUMAN V-type proton ATPase subunit C 1 OS=Homo sapiens GN=ATP6V1C1 PE=1 SV=4;tr|E7EV59|E7EV59_HUMAN V-type proton ATPase subunit C 1 OS=Homo sapiens GN=ATP6V1C1 PE=1 SV=1;tr|A0A0U1RR16|A0A0U1RR16_HUMAN V-type proton ATPase subunit C 2 OS=Ho	43941	0	89734	0	0	15904
Q5HY54;P21333;Q60FE5;A0A087WWY3;F8WE98	Q5HY54;P21333;Q60FE5;A0A087WWY3;F8WE98	Filamin-A	FLNA	tr|Q5HY54|Q5HY54_HUMAN Filamin-A OS=Homo sapiens GN=FLNA PE=1 SV=1;sp|P21333|FLNA_HUMAN Filamin-A OS=Homo sapiens GN=FLNA PE=1 SV=4;tr|Q60FE5|Q60FE5_HUMAN Filamin A OS=Homo sapiens GN=FLNA PE=1 SV=1;tr|A0A087WWY3|A0A087WWY3_HUMAN Filamin-A OS=Homo sapiens	276.55	0	62627	1647800	1099500	740580
P21399	P21399	Cytoplasmic aconitate hydratase	ACO1	sp|P21399|ACOC_HUMAN Cytoplasmic aconitate hydratase OS=Homo sapiens GN=ACO1 PE=1 SV=3	98398	0	232.56	4379700	9620400	9352900
P21589;Q96B60;H0Y7R7	P21589;Q96B60	5-nucleotidase	NT5E	sp|P21589|5NTD_HUMAN 5-nucleotidase OS=Homo sapiens GN=NT5E PE=1 SV=1;tr|Q96B60|Q96B60_HUMAN 5-nucleotidase OS=Homo sapiens GN=NT5E PE=1 SV=1	63367	0	18354	1156600	259520	534990
P21796;C9JI87	P21796;C9JI87	Voltage-dependent anion-selective channel protein 1	VDAC1	sp|P21796|VDAC1_HUMAN Voltage-dependent anion-selective channel protein 1 OS=Homo sapiens GN=VDAC1 PE=1 SV=2;tr|C9JI87|C9JI87_HUMAN Voltage-dependent anion-selective channel protein 1 (Fragment) OS=Homo sapiens GN=VDAC1 PE=1 SV=5	30772	0	15462	429250	550940	479720
P21980;A2A299;A2A2A0	P21980	Protein-glutamine gamma-glutamyltransferase 2	TGM2	sp|P21980|TGM2_HUMAN Protein-glutamine gamma-glutamyltransferase 2 OS=Homo sapiens GN=TGM2 PE=1 SV=2	77328	0	148.36	5145900	5519200	5018400
P22102	P22102	Trifunctional purine biosynthetic protein adenosine-3;Phosphoribosylamine--glycine ligase;Phosphoribosylformylglycinamidine cyclo-ligase;Phosphoribosylglycinamide formyltransferase	GART	sp|P22102|PUR2_HUMAN Trifunctional purine biosynthetic protein adenosine-3 OS=Homo sapiens GN=GART PE=1 SV=1	107.77	0	10677	0	326390	333370
P22314;Q5JRR6;Q5JRR9;Q5JRS0;Q5JRS1;Q5JRS3;Q5JRS2	P22314	Ubiquitin-like modifier-activating enzyme 1	UBA1	sp|P22314|UBA1_HUMAN Ubiquitin-like modifier-activating enzyme 1 OS=Homo sapiens GN=UBA1 PE=1 SV=3	117.85	0	323.31	3438600	6559200	6237600
Q32Q12;P22392;F6XY72;J3KPD9;C9K028;E5RHP0;E7ERL0;O60361;P15531	Q32Q12;P22392;F6XY72;J3KPD9	Nucleoside diphosphate kinase;Nucleoside diphosphate kinase B	NME1-NME2;NME2	tr|Q32Q12|Q32Q12_HUMAN Nucleoside diphosphate kinase OS=Homo sapiens GN=NME1-NME2 PE=1 SV=1;sp|P22392|NDKB_HUMAN Nucleoside diphosphate kinase B OS=Homo sapiens GN=NME2 PE=1 SV=1;tr|F6XY72|F6XY72_HUMAN HCG2001850, isoform CRA_c OS=Homo sapiens GN=NME2 PE=1	32642	0.0009058	24851	0	125140	266750
P22612	P22612	cAMP-dependent protein kinase catalytic subunit gamma	PRKACG	sp|P22612|KAPCG_HUMAN cAMP-dependent protein kinase catalytic subunit gamma OS=Homo sapiens GN=PRKACG PE=1 SV=3	40434	0	10335	0	0	318750
P23142	P23142	Fibulin-1	FBLN1	sp|P23142|FBLN1_HUMAN Fibulin-1 OS=Homo sapiens GN=FBLN1 PE=1 SV=4	77213	0.0017109	20467	0	0	103900
P23246;C9IZL7;H7C367;Q15233	P23246	Splicing factor, proline- and glutamine-rich	SFPQ	sp|P23246|SFPQ_HUMAN Splicing factor, proline- and glutamine-rich OS=Homo sapiens GN=SFPQ PE=1 SV=2	76149	0	64856	0	170230	308310
P23297;Q5T7Y6;Q5T7Y5;Q5T7Y4	P23297;Q5T7Y6	Protein S100-A1;Protein S100	S100A1	sp|P23297|S10A1_HUMAN Protein S100-A1 OS=Homo sapiens GN=S100A1 PE=1 SV=2;tr|Q5T7Y6|Q5T7Y6_HUMAN Protein S100 OS=Homo sapiens GN=S100A1 PE=1 SV=1	10546	0	57611	0	272330	1021300
P23368	P23368	NAD-dependent malic enzyme, mitochondrial	ME2	sp|P23368|MAOM_HUMAN NAD-dependent malic enzyme, mitochondrial OS=Homo sapiens GN=ME2 PE=1 SV=1	65443	0	61434	0	811780	433590
P23381;G3V3H8;G3V3Y5;G3V277;G3V423;G3V5U1;G3V456;G3V3P2;G3V227;G3V2Y7;G3V3X0;G3V5W1;G3V3S7;H0YJP3;G3V5H5;P78534;G3V4A3;G3V4Q0;G3V2F2;G3V3R3;G3V4S4;G3V313;G3V339;G3V2C0;G3V4C7;G3V4N8;G3V4N0	P23381;G3V3H8;G3V3Y5;G3V277	Tryptophan--tRNA ligase, cytoplasmic;T1-TrpRS;T2-TrpRS	WARS	sp|P23381|SYWC_HUMAN Tryptophan--tRNA ligase, cytoplasmic OS=Homo sapiens GN=WARS PE=1 SV=2;tr|G3V3H8|G3V3H8_HUMAN Tryptophan--tRNA ligase, cytoplasmic (Fragment) OS=Homo sapiens GN=WARS PE=1 SV=7;tr|G3V3Y5|G3V3Y5_HUMAN Tryptophan--tRNA ligase, cytoplasmic	53165	0	138.65	271730	2368000	1008700
P23396;E9PL09;E9PPU1;H0YEU2;F2Z2S8;H0YCJ7;H0YF32;E9PQ96;E9PJH4;E9PK82;E9PSF4;E9PQX2;H0YES8	P23396;E9PL09;E9PPU1;H0YEU2;F2Z2S8;H0YCJ7	40S ribosomal protein S3	RPS3	sp|P23396|RS3_HUMAN 40S ribosomal protein S3 OS=Homo sapiens GN=RPS3 PE=1 SV=2;tr|E9PL09|E9PL09_HUMAN 40S ribosomal protein S3 OS=Homo sapiens GN=RPS3 PE=1 SV=1;tr|E9PPU1|E9PPU1_HUMAN 40S ribosomal protein S3 OS=Homo sapiens GN=RPS3 PE=1 SV=1;tr|H0YEU2|H0Y	26688	0	58032	6275400	4298500	3341200
P23526	P23526	Adenosylhomocysteinase	AHCY	sp|P23526|SAHH_HUMAN Adenosylhomocysteinase OS=Homo sapiens GN=AHCY PE=1 SV=4	47716	0	51297	2916700	5890100	6304600
P23786	P23786	Carnitine O-palmitoyltransferase 2, mitochondrial	CPT2	sp|P23786|CPT2_HUMAN Carnitine O-palmitoyltransferase 2, mitochondrial OS=Homo sapiens GN=CPT2 PE=1 SV=2	73776	0	11211	0	247590	61198
P24298;H3BU54;Q8TD30	P24298	Alanine aminotransferase 1	GPT	sp|P24298|ALAT1_HUMAN Alanine aminotransferase 1 OS=Homo sapiens GN=GPT PE=1 SV=3	54636	0	10.21	119620	390220	161600
P24752;H0YEL7;E9PRQ6	P24752	Acetyl-CoA acetyltransferase, mitochondrial	ACAT1	sp|P24752|THIL_HUMAN Acetyl-CoA acetyltransferase, mitochondrial OS=Homo sapiens GN=ACAT1 PE=1 SV=1	45199	0	70739	1155200	2284800	1907200
P25311;C9JEV0;H7BZJ8	P25311;C9JEV0	Zinc-alpha-2-glycoprotein	AZGP1	sp|P25311|ZA2G_HUMAN Zinc-alpha-2-glycoprotein OS=Homo sapiens GN=AZGP1 PE=1 SV=2;tr|C9JEV0|C9JEV0_HUMAN Zinc-alpha-2-glycoprotein OS=Homo sapiens GN=AZGP1 PE=1 SV=1	34258	0	15448	1870700	131060	194770
P25325;B1AH49	P25325;B1AH49	3-mercaptopyruvate sulfurtransferase;Sulfurtransferase	MPST	sp|P25325|THTM_HUMAN 3-mercaptopyruvate sulfurtransferase OS=Homo sapiens GN=MPST PE=1 SV=3;tr|B1AH49|B1AH49_HUMAN Sulfurtransferase OS=Homo sapiens GN=MPST PE=1 SV=1	33178	0	35319	0	360750	305650
P25705;K7EK77;K7ERX7;K7ENJ4;K7EJP1;K7EQH4;K7ESA0	P25705	ATP synthase subunit alpha, mitochondrial	ATP5A1	sp|P25705|ATPA_HUMAN ATP synthase subunit alpha, mitochondrial OS=Homo sapiens GN=ATP5A1 PE=1 SV=1	59.75	0	85213	5217400	3484700	1367400
P25940	P25940	Collagen alpha-3(V) chain	COL5A3	sp|P25940|CO5A3_HUMAN Collagen alpha-3(V) chain OS=Homo sapiens GN=COL5A3 PE=1 SV=3	172.12	0.0063847	14777	0	127340	0
P26038;P35241;V9GZ54;E9PQ82;E9PNV3;E9PNP4	P26038	Moesin	MSN	sp|P26038|MOES_HUMAN Moesin OS=Homo sapiens GN=MSN PE=1 SV=3	67819	0	106.93	5535000	2135600	1563300
P26196;Q8IV96	P26196	Probable ATP-dependent RNA helicase DDX6	DDX6	sp|P26196|DDX6_HUMAN Probable ATP-dependent RNA helicase DDX6 OS=Homo sapiens GN=DDX6 PE=1 SV=2	54416	0	66775	99488	122970	234470
P26639	P26639	Threonine--tRNA ligase, cytoplasmic	TARS	sp|P26639|SYTC_HUMAN Threonine--tRNA ligase, cytoplasmic OS=Homo sapiens GN=TARS PE=1 SV=3	83434	0	51371	279800	583550	1102800
P26640;A0A140T936;A0A140T954;A2ABF4;A0A0G2JJT9;A0A140T904;H0Y426	P26640;A0A140T936	Valine--tRNA ligase	VARS	sp|P26640|SYVC_HUMAN Valine--tRNA ligase OS=Homo sapiens GN=VARS PE=1 SV=4;tr|A0A140T936|A0A140T936_HUMAN Valine--tRNA ligase (Fragment) OS=Homo sapiens GN=VARS PE=1 SV=1	140.47	0	56476	277140	1143900	809670
P26641	P26641	Elongation factor 1-gamma	EEF1G	sp|P26641|EF1G_HUMAN Elongation factor 1-gamma OS=Homo sapiens GN=EEF1G PE=1 SV=3	50118	0	56649	2535200	4707300	5683700
P27105;F8VSL7	P27105	Erythrocyte band 7 integral membrane protein	STOM	sp|P27105|STOM_HUMAN Erythrocyte band 7 integral membrane protein OS=Homo sapiens GN=STOM PE=1 SV=3	31.73	0	78565	3318300	1355100	1148100
P27169	P27169	Serum paraoxonase/arylesterase 1	PON1	sp|P27169|PON1_HUMAN Serum paraoxonase/arylesterase 1 OS=Homo sapiens GN=PON1 PE=1 SV=3	39731	0.005668	15423	0	0	47940
P27348;E9PG15;Q4VY20;A0A0J9YWZ2;Q4VY19;A0A0J9YWE8	P27348;E9PG15	14-3-3 protein theta	YWHAQ	sp|P27348|1433T_HUMAN 14-3-3 protein theta OS=Homo sapiens GN=YWHAQ PE=1 SV=1;tr|E9PG15|E9PG15_HUMAN 14-3-3 protein theta (Fragment) OS=Homo sapiens GN=YWHAQ PE=1 SV=1	27764	0	87264	338230	246870	286970
P27694;I3L524;I3L2M5;I3L4R8	P27694	Replication protein A 70 kDa DNA-binding subunit;Replication protein A 70 kDa DNA-binding subunit, N-terminally processed	RPA1	sp|P27694|RFA1_HUMAN Replication protein A 70 kDa DNA-binding subunit OS=Homo sapiens GN=RPA1 PE=1 SV=2	68137	0	18874	80280	109010	360120
P27824	P27824	Calnexin	CANX	sp|P27824|CALX_HUMAN Calnexin OS=Homo sapiens GN=CANX PE=1 SV=2	67567	0.0064051	14955	0	0	12905
P28161;E9PHN7;E9PHN6;F6XZQ7;E9PLF1;E9PGV1	P28161;E9PHN7;E9PHN6;F6XZQ7;E9PLF1	Glutathione S-transferase Mu 2	GSTM2	sp|P28161|GSTM2_HUMAN Glutathione S-transferase Mu 2 OS=Homo sapiens GN=GSTM2 PE=1 SV=2;tr|E9PHN7|E9PHN7_HUMAN Glutathione S-transferase Mu 2 OS=Homo sapiens GN=GSTM2 PE=1 SV=2;tr|E9PHN6|E9PHN6_HUMAN Glutathione S-transferase Mu 2 OS=Homo sapiens GN=GSTM2	25744	0	125.74	1082800	3261300	5929200
P28289	P28289	Tropomodulin-1	TMOD1	sp|P28289|TMOD1_HUMAN Tropomodulin-1 OS=Homo sapiens GN=TMOD1 PE=1 SV=1	40569	0	74324	0	0	37622
P28482	P28482	Mitogen-activated protein kinase 1	MAPK1	sp|P28482|MK01_HUMAN Mitogen-activated protein kinase 1 OS=Homo sapiens GN=MAPK1 PE=1 SV=3	41389	0	24.69	474730	1568200	1597100
P28838;H0Y9Q1	P28838;H0Y9Q1	Cytosol aminopeptidase	LAP3	sp|P28838|AMPL_HUMAN Cytosol aminopeptidase OS=Homo sapiens GN=LAP3 PE=1 SV=3;tr|H0Y9Q1|H0Y9Q1_HUMAN Cytosol aminopeptidase (Fragment) OS=Homo sapiens GN=LAP3 PE=1 SV=7	56166	0	92694	352980	328800	217200
Q5JTA5;P28906	Q5JTA5;P28906	Hematopoietic progenitor cell antigen CD34	CD34	tr|Q5JTA5|Q5JTA5_HUMAN Hematopoietic progenitor cell antigen CD34 OS=Homo sapiens GN=CD34 PE=1 SV=1;sp|P28906|CD34_HUMAN Hematopoietic progenitor cell antigen CD34 OS=Homo sapiens GN=CD34 PE=1 SV=2	24.5	0	4775	963380	0	187670
Q5VZU9;P29144	Q5VZU9;P29144	Tripeptidyl-peptidase 2	TPP2	tr|Q5VZU9|Q5VZU9_HUMAN Tripeptidyl-peptidase 2 OS=Homo sapiens GN=TPP2 PE=1 SV=1;sp|P29144|TPP2_HUMAN Tripeptidyl-peptidase 2 OS=Homo sapiens GN=TPP2 PE=1 SV=4	139.76	0	47725	360550	816730	1109000
P29992;K7EL62;O95837;A0A087WVZ3	P29992;K7EL62;O95837	Guanine nucleotide-binding protein subunit alpha-11;Guanine nucleotide-binding protein subunit alpha-14	GNA11;GNA14	sp|P29992|GNA11_HUMAN Guanine nucleotide-binding protein subunit alpha-11 OS=Homo sapiens GN=GNA11 PE=1 SV=2;tr|K7EL62|K7EL62_HUMAN Guanine nucleotide-binding protein subunit alpha-11 (Fragment) OS=Homo sapiens GN=GNA11 PE=1 SV=1;sp|O95837|GNA14_HUMAN Guan	42123	0	14.7	1364700	919920	935130
P30038;Q5TF55	P30038	Delta-1-pyrroline-5-carboxylate dehydrogenase, mitochondrial	ALDH4A1	sp|P30038|AL4A1_HUMAN Delta-1-pyrroline-5-carboxylate dehydrogenase, mitochondrial OS=Homo sapiens GN=ALDH4A1 PE=1 SV=3	61719	0	10566	104960	198900	114760
P30041	P30041	Peroxiredoxin-6	PRDX6	sp|P30041|PRDX6_HUMAN Peroxiredoxin-6 OS=Homo sapiens GN=PRDX6 PE=1 SV=3	25035	0	41201	1307500	1619100	2491700
P30043;M0R192;M0QZL1	P30043;M0R192;M0QZL1	Flavin reductase (NADPH)	BLVRB	sp|P30043|BLVRB_HUMAN Flavin reductase (NADPH) OS=Homo sapiens GN=BLVRB PE=1 SV=3;tr|M0R192|M0R192_HUMAN Flavin reductase (NADPH) OS=Homo sapiens GN=BLVRB PE=1 SV=1;tr|M0QZL1|M0QZL1_HUMAN Flavin reductase (NADPH) OS=Homo sapiens GN=BLVRB PE=1 SV=1	22119	0	60761	324420	2183200	3054700
P30044	P30044	Peroxiredoxin-5, mitochondrial	PRDX5	sp|P30044|PRDX5_HUMAN Peroxiredoxin-5, mitochondrial OS=Homo sapiens GN=PRDX5 PE=1 SV=4	22086	0	10686	0	80428	366630
P30046;J3KQ18;B5MC82;A6NHG4;H7C342	P30046;J3KQ18;B5MC82;A6NHG4	D-dopachrome decarboxylase;D-dopachrome decarboxylase-like protein	DDT;DDTL	sp|P30046|DOPD_HUMAN D-dopachrome decarboxylase OS=Homo sapiens GN=DDT PE=1 SV=3;tr|J3KQ18|J3KQ18_HUMAN D-dopachrome decarboxylase OS=Homo sapiens GN=DDT PE=1 SV=1;tr|B5MC82|B5MC82_HUMAN D-dopachrome decarboxylase OS=Homo sapiens GN=DDT PE=4 SV=2;sp|A6NHG4	12712	0	36925	0	544490	1635100
P30048	P30048	Thioredoxin-dependent peroxide reductase, mitochondrial	PRDX3	sp|P30048|PRDX3_HUMAN Thioredoxin-dependent peroxide reductase, mitochondrial OS=Homo sapiens GN=PRDX3 PE=1 SV=3	27692	0	25599	622200	166250	116390
P30050	P30050	60S ribosomal protein L12	RPL12	sp|P30050|RL12_HUMAN 60S ribosomal protein L12 OS=Homo sapiens GN=RPL12 PE=1 SV=1	17818	0	36436	0	603680	277950
P30086	P30086	Phosphatidylethanolamine-binding protein 1;Hippocampal cholinergic neurostimulating peptide	PEBP1	sp|P30086|PEBP1_HUMAN Phosphatidylethanolamine-binding protein 1 OS=Homo sapiens GN=PEBP1 PE=1 SV=3	21057	0	73866	719690	816220	1918200
P30101	P30101	Protein disulfide-isomerase A3	PDIA3	sp|P30101|PDIA3_HUMAN Protein disulfide-isomerase A3 OS=Homo sapiens GN=PDIA3 PE=1 SV=4	56782	0.00088731	22871	0	136460	97717
P30153;B3KQV6;C9J9C1;E9PH38;P30154;E9PPI5;E9PNM7;E9PHZ6;H0YDG7	P30153;B3KQV6	Serine/threonine-protein phosphatase 2A 65 kDa regulatory subunit A alpha isoform	PPP2R1A	sp|P30153|2AAA_HUMAN Serine/threonine-protein phosphatase 2A 65 kDa regulatory subunit A alpha isoform OS=Homo sapiens GN=PPP2R1A PE=1 SV=4;tr|B3KQV6|B3KQV6_HUMAN Serine/threonine-protein phosphatase 2A 65 kDa regulatory subunit A alpha isoform OS=Homo sap	65308	0	77803	2274200	4947900	4728100
P30481;A0A140T9H3;A0A140T9A9;Q04826;P30488;P30487;P30485;P30483;P30479;P03989;A0A140T9S9;A0A140T9G0;A0A140T951;A0A140T9Y5;A0A140T997;P30466;P30461;A0A140TA14;A0A140TA11	P30481;A0A140T9H3;A0A140T9A9;Q04826;P30488;P30487;P30485;P30483;P30479;P03989;A0A140T9S9;A0A140T9G0;A0A140T951;A0A140T9Y5;A0A140T997;P30466;P30461	HLA class I histocompatibility antigen, B-44 alpha chain;HLA class I histocompatibility antigen, B-40 alpha chain;HLA class I histocompatibility antigen, B-50 alpha chain;HLA class I histocompatibility antigen, B-49 alpha chain;HLA class I histocompatibility antigen, B-47 alpha chain;HLA class I histocompatibility antigen, B-45 alpha chain;HLA class I histocompatibility antigen, B-41 alpha chain;…	HLA-B	sp|P30481|1B44_HUMAN HLA class I histocompatibility antigen, B-44 alpha chain OS=Homo sapiens GN=HLA-B PE=1 SV=1;tr|A0A140T9H3|A0A140T9H3_HUMAN HLA class I histocompatibility antigen, B-46 alpha chain (Fragment) OS=Homo sapiens GN=HLA-B PE=1 SV=1;tr|A0A140	40481	0	63288	0	191660	209110
P30566;A0A096LNY6;A0A0A6YY92;A0A096LNY5;A0A096LP92;A0A096LPA2;A0A096LNT4;V9GY96;A0A096LP76;A0A096LNY4	P30566;A0A096LNY6;A0A0A6YY92;A0A096LNY5	Adenylosuccinate lyase	ADSL	sp|P30566|PUR8_HUMAN Adenylosuccinate lyase OS=Homo sapiens GN=ADSL PE=1 SV=2;tr|A0A096LNY6|A0A096LNY6_HUMAN Adenylosuccinate lyase (Fragment) OS=Homo sapiens GN=ADSL PE=1 SV=1;tr|A0A0A6YY92|A0A0A6YY92_HUMAN Adenylosuccinate lyase OS=Homo sapiens GN=ADSL P	54889	0	38693	279300	739470	619530
P30711;A0A0G2JQD2;A0A0G2JQM0;A0A0G2JRN4;A0A0G2JRQ5;A0A0G2JMS2;A0A0G2JQD8;A0A0G2JRG0;Q4W251;A0A0G2JRJ5	P30711;A0A0G2JQD2;A0A0G2JQM0;A0A0G2JRN4;A0A0G2JRQ5	Glutathione S-transferase theta-1	GSTT1	sp|P30711|GSTT1_HUMAN Glutathione S-transferase theta-1 OS=Homo sapiens GN=GSTT1 PE=1 SV=4;tr|A0A0G2JQD2|A0A0G2JQD2_HUMAN Glutathione S-transferase theta-1 (Fragment) OS=Homo sapiens GN=GSTT1 PE=1 SV=1;tr|A0A0G2JQM0|A0A0G2JQM0_HUMAN Glutathione S-transfera	27335	0	35552	184840	3621200	794070
P31025;Q5VSP4	P31025;Q5VSP4	Lipocalin-1;Putative lipocalin 1-like protein 1	LCN1;LCN1P1	sp|P31025|LCN1_HUMAN Lipocalin-1 OS=Homo sapiens GN=LCN1 PE=1 SV=1;sp|Q5VSP4|LC1L1_HUMAN Putative lipocalin 1-like protein 1 OS=Homo sapiens GN=LCN1P1 PE=5 SV=1	19.25	0	61695	1531800	63857	91249
P31150;G5E9U5	P31150	Rab GDP dissociation inhibitor alpha	GDI1	sp|P31150|GDIA_HUMAN Rab GDP dissociation inhibitor alpha OS=Homo sapiens GN=GDI1 PE=1 SV=2	50582	0	48605	253070	486530	772800
P31151	P31151	Protein S100-A7	S100A7	sp|P31151|S10A7_HUMAN Protein S100-A7 OS=Homo sapiens GN=S100A7 PE=1 SV=4	11471	0.0064412	15157	178390	0	0
P31153	P31153	S-adenosylmethionine synthase isoform type-2	MAT2A	sp|P31153|METK2_HUMAN S-adenosylmethionine synthase isoform type-2 OS=Homo sapiens GN=MAT2A PE=1 SV=1	43.66	0	28117	211500	222720	512700
P31323	P31323	cAMP-dependent protein kinase type II-beta regulatory subunit	PRKAR2B	sp|P31323|KAP3_HUMAN cAMP-dependent protein kinase type II-beta regulatory subunit OS=Homo sapiens GN=PRKAR2B PE=1 SV=3	46302	0	19174	0	116890	220860
P31930	P31930	Cytochrome b-c1 complex subunit 1, mitochondrial	UQCRC1	sp|P31930|QCR1_HUMAN Cytochrome b-c1 complex subunit 1, mitochondrial OS=Homo sapiens GN=UQCRC1 PE=1 SV=3	52645	0	19194	1305000	1379700	698020
P31937	P31937	3-hydroxyisobutyrate dehydrogenase, mitochondrial	HIBADH	sp|P31937|3HIDH_HUMAN 3-hydroxyisobutyrate dehydrogenase, mitochondrial OS=Homo sapiens GN=HIBADH PE=1 SV=2	35329	0	70212	0	89600	82797
P31939;H7C1S2;C9JLK0;F8WEF0	P31939	Bifunctional purine biosynthesis protein PURH;Phosphoribosylaminoimidazolecarboxamide formyltransferase;IMP cyclohydrolase	ATIC	sp|P31939|PUR9_HUMAN Bifunctional purine biosynthesis protein PURH OS=Homo sapiens GN=ATIC PE=1 SV=3	64615	0	121.29	557810	2220200	2318400
P31946	P31946	14-3-3 protein beta/alpha;14-3-3 protein beta/alpha, N-terminally processed	YWHAB	sp|P31946|1433B_HUMAN 14-3-3 protein beta/alpha OS=Homo sapiens GN=YWHAB PE=1 SV=3	28082	0	14154	0	104350	118640
P31947	P31947	14-3-3 protein sigma	SFN	sp|P31947|1433S_HUMAN 14-3-3 protein sigma OS=Homo sapiens GN=SFN PE=1 SV=1	27774	0.0024651	1.63	0	0	18073
P31949	P31949	Protein S100-A11;Protein S100-A11, N-terminally processed	S100A11	sp|P31949|S10AB_HUMAN Protein S100-A11 OS=Homo sapiens GN=S100A11 PE=1 SV=2	11.74	0.00089847	24057	0	0	24040
P32119;A6NIW5	P32119;A6NIW5	Peroxiredoxin-2	PRDX2	sp|P32119|PRDX2_HUMAN Peroxiredoxin-2 OS=Homo sapiens GN=PRDX2 PE=1 SV=5;tr|A6NIW5|A6NIW5_HUMAN Peroxiredoxin 2, isoform CRA_a OS=Homo sapiens GN=PRDX2 PE=1 SV=2	21892	0	19914	3161100	1084300	2255500
P32455	P32455	Interferon-induced guanylate-binding protein 1	GBP1	sp|P32455|GBP1_HUMAN Guanylate-binding protein 1 OS=Homo sapiens GN=GBP1 PE=1 SV=2	67.93	0	74319	0	115880	0
P33176;A0A0G2JMZ6;J3KNA1;O60282;Q12840	P33176	Kinesin-1 heavy chain	KIF5B	sp|P33176|KINH_HUMAN Kinesin-1 heavy chain OS=Homo sapiens GN=KIF5B PE=1 SV=1	109.68	0	34836	152050	275700	246100
P34913;E5RFU2;H0YAW7;E5RFH6;E5RI53	P34913;E5RFU2;H0YAW7;E5RFH6	Bifunctional epoxide hydrolase 2;Cytosolic epoxide hydrolase 2;Lipid-phosphate phosphatase	EPHX2	sp|P34913|HYES_HUMAN Bifunctional epoxide hydrolase 2 OS=Homo sapiens GN=EPHX2 PE=1 SV=2;tr|E5RFU2|E5RFU2_HUMAN Bifunctional epoxide hydrolase 2 OS=Homo sapiens GN=EPHX2 PE=1 SV=1;tr|H0YAW7|H0YAW7_HUMAN Bifunctional epoxide hydrolase 2 (Fragment) OS=Homo s	62615	0	57578	722460	477450	1535300
P35221;E5RGY6;E5RG03;E5RJ41;E5RIB1;G3XAM7;P26232	P35221;E5RGY6;E5RG03;E5RJ41;E5RIB1;G3XAM7;P26232	Catenin alpha-1;Catenin alpha-2	CTNNA1;CTNNA2	sp|P35221|CTNA1_HUMAN Catenin alpha-1 OS=Homo sapiens GN=CTNNA1 PE=1 SV=1;tr|E5RGY6|E5RGY6_HUMAN Catenin alpha-1 (Fragment) OS=Homo sapiens GN=CTNNA1 PE=1 SV=1;tr|E5RG03|E5RG03_HUMAN Catenin alpha-1 (Fragment) OS=Homo sapiens GN=CTNNA1 PE=1 SV=1;tr|E5RJ41|	100.07	0.0024896	17195	0	0	73154
P35270	P35270	Sepiapterin reductase	SPR	sp|P35270|SPRE_HUMAN Sepiapterin reductase OS=Homo sapiens GN=SPR PE=1 SV=1	28048	0	29874	0	239220	268330
P35573	P35573	Glycogen debranching enzyme;4-alpha-glucanotransferase;Amylo-alpha-1,6-glucosidase	AGL	sp|P35573|GDE_HUMAN Glycogen debranching enzyme OS=Homo sapiens GN=AGL PE=1 SV=3	174.76	0	323.31	8145500	23704000	23728000
P35579	P35579	Myosin-9	MYH9	sp|P35579|MYH9_HUMAN Myosin-9 OS=Homo sapiens GN=MYH9 PE=1 SV=4	226.53	0	31.44	222810	655230	403690
P35606;D6R997;D6RBZ7;D6RCL6;D6RBG7;D6RBT6	P35606	Coatomer subunit beta	COPB2	sp|P35606|COPB2_HUMAN Coatomer subunit beta OS=Homo sapiens GN=COPB2 PE=1 SV=2	102.49	0	26042	421520	469520	819470
P35609;F6THM6;D6RH00;K7EP19	P35609;F6THM6	Alpha-actinin-2	ACTN2	sp|P35609|ACTN2_HUMAN Alpha-actinin-2 OS=Homo sapiens GN=ACTN2 PE=1 SV=1;tr|F6THM6|F6THM6_HUMAN Alpha-actinin-2 OS=Homo sapiens GN=ACTN2 PE=1 SV=1	103.85	0	323.31	135120000	69734000	76651000
P35754	P35754	Glutaredoxin-1	GLRX	sp|P35754|GLRX1_HUMAN Glutaredoxin-1 OS=Homo sapiens GN=GLRX PE=1 SV=2	11776	0.0064	14906	0	0	56376
P35858	P35858	Insulin-like growth factor-binding protein complex acid labile subunit	IGFALS	sp|P35858|ALS_HUMAN Insulin-like growth factor-binding protein complex acid labile subunit OS=Homo sapiens GN=IGFALS PE=1 SV=1	66034	0	12819	0	52171	40911
P35998;C9JLS9	P35998	26S protease regulatory subunit 7	PSMC2	sp|P35998|PRS7_HUMAN 26S protease regulatory subunit 7 OS=Homo sapiens GN=PSMC2 PE=1 SV=3	48633	0	55395	340340	783830	1100400
P36269;H7C1X2	P36269	Gamma-glutamyltransferase 5;Gamma-glutamyltransferase 5 heavy chain;Gamma-glutamyltransferase 5 light chain	GGT5	sp|P36269|GGT5_HUMAN Gamma-glutamyltransferase 5 OS=Homo sapiens GN=GGT5 PE=1 SV=2	62.26	0	26944	2080500	449050	615360
P36404	P36404	ADP-ribosylation factor-like protein 2	ARL2	sp|P36404|ARL2_HUMAN ADP-ribosylation factor-like protein 2 OS=Homo sapiens GN=ARL2 PE=1 SV=4	20878	0	13285	0	0	39261
P36405	P36405	ADP-ribosylation factor-like protein 3	ARL3	sp|P36405|ARL3_HUMAN ADP-ribosylation factor-like protein 3 OS=Homo sapiens GN=ARL3 PE=1 SV=2	20455	0	36098	0	0	47472
P36507;G5E9C7;M0R1B6	P36507;G5E9C7	Dual specificity mitogen-activated protein kinase kinase 2	MAP2K2	sp|P36507|MP2K2_HUMAN Dual specificity mitogen-activated protein kinase kinase 2 OS=Homo sapiens GN=MAP2K2 PE=1 SV=1;tr|G5E9C7|G5E9C7_HUMAN Dual-specificity mitogen-activated protein kinase kinase 2 OS=Homo sapiens GN=MAP2K2 PE=1 SV=1	44424	0	99909	207330	1041200	1233800
P36542	P36542	ATP synthase subunit gamma, mitochondrial	ATP5C1	sp|P36542|ATPG_HUMAN ATP synthase subunit gamma, mitochondrial OS=Homo sapiens GN=ATP5C1 PE=1 SV=1	32996	0	11979	178040	234330	0
P36871	P36871	Phosphoglucomutase-1	PGM1	sp|P36871|PGM1_HUMAN Phosphoglucomutase-1 OS=Homo sapiens GN=PGM1 PE=1 SV=3	61448	0	248.47	18940000	30700000	18499000
P84074;P61601;P37235	P84074;P61601;P37235	Neuron-specific calcium-binding protein hippocalcin;Neurocalcin-delta;Hippocalcin-like protein 1	HPCA;NCALD;HPCAL1	sp|P84074|HPCA_HUMAN Neuron-specific calcium-binding protein hippocalcin OS=Homo sapiens GN=HPCA PE=1 SV=2;sp|P61601|NCALD_HUMAN Neurocalcin-delta OS=Homo sapiens GN=NCALD PE=1 SV=2;sp|P37235|HPCL1_HUMAN Hippocalcin-like protein 1 OS=Homo sapiens GN=HPCAL1	22427	0.00086655	21512	0	0	84849
X6RJP6;P37802	X6RJP6;P37802	Transgelin-2	TAGLN2	tr|X6RJP6|X6RJP6_HUMAN Transgelin-2 (Fragment) OS=Homo sapiens GN=TAGLN2 PE=1 SV=1;sp|P37802|TAGL2_HUMAN Transgelin-2 OS=Homo sapiens GN=TAGLN2 PE=1 SV=3	21086	0	68646	431180	289060	598970
P38117;M0QY67	P38117	Electron transfer flavoprotein subunit beta	ETFB	sp|P38117|ETFB_HUMAN Electron transfer flavoprotein subunit beta OS=Homo sapiens GN=ETFB PE=1 SV=3	27843	0	14149	490230	1784100	1169200
P38606;C9JA17;C9JVW8	P38606	V-type proton ATPase catalytic subunit A	ATP6V1A	sp|P38606|VATA_HUMAN V-type proton ATPase catalytic subunit A OS=Homo sapiens GN=ATP6V1A PE=1 SV=2	68303	0	63.27	574240	695330	957920
P38646;H0Y8S0;H0YBG6	P38646	Stress-70 protein, mitochondrial	HSPA9	sp|P38646|GRP75_HUMAN Stress-70 protein, mitochondrial OS=Homo sapiens GN=HSPA9 PE=1 SV=2	73.68	0	18379	0	197680	128460
P38919	P38919	Eukaryotic initiation factor 4A-III;Eukaryotic initiation factor 4A-III, N-terminally processed	EIF4A3	sp|P38919|IF4A3_HUMAN Eukaryotic initiation factor 4A-III OS=Homo sapiens GN=EIF4A3 PE=1 SV=4	46871	0	33233	81318	106020	272410
P39023;F8WCR1;H7C3M2;B5MCW2;H7C422;G5E9G0	P39023;F8WCR1;H7C3M2;B5MCW2;H7C422;G5E9G0	60S ribosomal protein L3	RPL3	sp|P39023|RL3_HUMAN 60S ribosomal protein L3 OS=Homo sapiens GN=RPL3 PE=1 SV=2;tr|F8WCR1|F8WCR1_HUMAN 60S ribosomal protein L3 OS=Homo sapiens GN=RPL3 PE=1 SV=1;tr|H7C3M2|H7C3M2_HUMAN 60S ribosomal protein L3 (Fragment) OS=Homo sapiens GN=RPL3 PE=1 SV=1;tr	46108	0	33436	410300	0	0
P40227;Q92526	P40227	T-complex protein 1 subunit zeta	CCT6A	sp|P40227|TCPZ_HUMAN T-complex protein 1 subunit zeta OS=Homo sapiens GN=CCT6A PE=1 SV=3	58024	0	95264	815300	1367200	495900
P40763;G8JLH9	P40763;G8JLH9	Signal transducer and activator of transcription 3;Signal transducer and activator of transcription	STAT3	sp|P40763|STAT3_HUMAN Signal transducer and activator of transcription 3 OS=Homo sapiens GN=STAT3 PE=1 SV=2;tr|G8JLH9|G8JLH9_HUMAN Signal transducer and activator of transcription OS=Homo sapiens GN=STAT3 PE=1 SV=1	88067	0	53798	353870	867680	430950
P40925;B8ZZ51;B9A041;C9JF79;C9JLV6;C9JRL4	P40925;B8ZZ51;B9A041;C9JF79	Malate dehydrogenase, cytoplasmic;Malate dehydrogenase	MDH1	sp|P40925|MDHC_HUMAN Malate dehydrogenase, cytoplasmic OS=Homo sapiens GN=MDH1 PE=1 SV=4;tr|B8ZZ51|B8ZZ51_HUMAN Malate dehydrogenase, cytoplasmic OS=Homo sapiens GN=MDH1 PE=1 SV=1;tr|B9A041|B9A041_HUMAN Malate dehydrogenase, cytoplasmic OS=Homo sapiens GN=	36426	0	19977	1644800	658510	793950
P40926;G3XAL0	P40926;G3XAL0	Malate dehydrogenase, mitochondrial;Malate dehydrogenase	MDH2	sp|P40926|MDHM_HUMAN Malate dehydrogenase, mitochondrial OS=Homo sapiens GN=MDH2 PE=1 SV=3;tr|G3XAL0|G3XAL0_HUMAN Malate dehydrogenase OS=Homo sapiens GN=MDH2 PE=1 SV=1	35503	0	107.47	5384000	4411100	1482600
P40939;H0YFD6	P40939;H0YFD6	Trifunctional enzyme subunit alpha, mitochondrial;Long-chain enoyl-CoA hydratase;Long chain 3-hydroxyacyl-CoA dehydrogenase	HADHA	sp|P40939|ECHA_HUMAN Trifunctional enzyme subunit alpha, mitochondrial OS=Homo sapiens GN=HADHA PE=1 SV=2;tr|H0YFD6|H0YFD6_HUMAN Trifunctional enzyme subunit alpha, mitochondrial (Fragment) OS=Homo sapiens GN=HADHA PE=1 SV=1	82999	0	44053	378150	538000	368260
P41091;Q2VIR3;F8W810	P41091;Q2VIR3;F8W810	Eukaryotic translation initiation factor 2 subunit 3;Putative eukaryotic translation initiation factor 2 subunit 3-like protein	EIF2S3;EIF2S3L	sp|P41091|IF2G_HUMAN Eukaryotic translation initiation factor 2 subunit 3 OS=Homo sapiens GN=EIF2S3 PE=1 SV=3;sp|Q2VIR3|IF2GL_HUMAN Putative eukaryotic translation initiation factor 2 subunit 3-like protein OS=Homo sapiens GN=EIF2S3L PE=5 SV=2;tr|F8W810|F8	51109	0	40081	0	658100	1536900
P41240;H3BU69;H3BUM9	P41240;H3BU69;H3BUM9	Tyrosine-protein kinase CSK	CSK	sp|P41240|CSK_HUMAN Tyrosine-protein kinase CSK OS=Homo sapiens GN=CSK PE=1 SV=1;tr|H3BU69|H3BU69_HUMAN Tyrosine-protein kinase CSK (Fragment) OS=Homo sapiens GN=CSK PE=1 SV=1;tr|H3BUM9|H3BUM9_HUMAN Tyrosine-protein kinase CSK (Fragment) OS=Homo sapiens GN	50704	0	59289	0	64374	81907
P41250	P41250	Glycine--tRNA ligase	GARS	sp|P41250|SYG_HUMAN Glycine--tRNA ligase OS=Homo sapiens GN=GARS PE=1 SV=3	83165	0	50067	0	730550	1152100
P42025	P42025	Beta-centractin	ACTR1B	sp|P42025|ACTY_HUMAN Beta-centractin OS=Homo sapiens GN=ACTR1B PE=1 SV=1	42293	0	28305	0	217320	146140
P42336	P42336	Phosphatidylinositol 4,5-bisphosphate 3-kinase catalytic subunit alpha isoform	PIK3CA	sp|P42336|PK3CA_HUMAN Phosphatidylinositol 4,5-bisphosphate 3-kinase catalytic subunit alpha isoform OS=Homo sapiens GN=PIK3CA PE=1 SV=2	124.28	0.00087108	21671	0	0	28298
P42345	P42345	Serine/threonine-protein kinase mTOR	MTOR	sp|P42345|MTOR_HUMAN Serine/threonine-protein kinase mTOR OS=Homo sapiens GN=MTOR PE=1 SV=1	288.89	0.0071656	14576	0	4938	0
P42704	P42704	Leucine-rich PPR motif-containing protein, mitochondrial	LRPPRC	sp|P42704|LPPRC_HUMAN Leucine-rich PPR motif-containing protein, mitochondrial OS=Homo sapiens GN=LRPPRC PE=1 SV=3	157.9	0.0025253	18636	0	0	8735.2
P42765;A0A0B4J2A4;K7EME0;K7ER88;K7EJB1;K7EJ68	P42765;A0A0B4J2A4;K7EME0	3-ketoacyl-CoA thiolase, mitochondrial	ACAA2	sp|P42765|THIM_HUMAN 3-ketoacyl-CoA thiolase, mitochondrial OS=Homo sapiens GN=ACAA2 PE=1 SV=2;tr|A0A0B4J2A4|A0A0B4J2A4_HUMAN 3-ketoacyl-CoA thiolase, mitochondrial OS=Homo sapiens GN=ACAA2 PE=1 SV=1;tr|K7EME0|K7EME0_HUMAN 3-ketoacyl-CoA thiolase, mitochon	41924	0	57272	2969400	1717700	595710
P42785	P42785	Lysosomal Pro-X carboxypeptidase	PRCP	sp|P42785|PCP_HUMAN Lysosomal Pro-X carboxypeptidase OS=Homo sapiens GN=PRCP PE=1 SV=1	55799	0.0093531	13617	0	27619	0
P42898	P42898	Methylenetetrahydrofolate reductase	MTHFR	sp|P42898|MTHR_HUMAN Methylenetetrahydrofolate reductase OS=Homo sapiens GN=MTHFR PE=1 SV=3	74596	0	28089	0	0	54820
P43034;I3L3N5;I3L495	P43034;I3L3N5	Platelet-activating factor acetylhydrolase IB subunit alpha	PAFAH1B1	sp|P43034|LIS1_HUMAN Platelet-activating factor acetylhydrolase IB subunit alpha OS=Homo sapiens GN=PAFAH1B1 PE=1 SV=2;tr|I3L3N5|I3L3N5_HUMAN Platelet-activating factor acetylhydrolase IB subunit alpha (Fragment) OS=Homo sapiens GN=PAFAH1B1 PE=1 SV=1	46637	0	38795	556960	945670	638950
P43155;H0Y4Z7	P43155	Carnitine O-acetyltransferase	CRAT	sp|P43155|CACP_HUMAN Carnitine O-acetyltransferase OS=Homo sapiens GN=CRAT PE=1 SV=5	70857	0	59919	0	289220	145050
P43686	P43686	26S protease regulatory subunit 6B	PSMC4	sp|P43686|PRS6B_HUMAN 26S protease regulatory subunit 6B OS=Homo sapiens GN=PSMC4 PE=1 SV=2	47366	0	47006	0	590150	364090
P45974;H7C5J3;Q92995	P45974	Ubiquitin carboxyl-terminal hydrolase 5	USP5	sp|P45974|UBP5_HUMAN Ubiquitin carboxyl-terminal hydrolase 5 OS=Homo sapiens GN=USP5 PE=1 SV=2	95785	0	32659	190710	213430	317350
P45984;E5RJ57;D6RAU3;D7R525;H0Y9H3;J3KNK1;P53779	P45984;E5RJ57;D6RAU3;D7R525;H0Y9H3;J3KNK1;P53779	Mitogen-activated protein kinase 9;Mitogen-activated protein kinase 10	MAPK9;MAPK10	sp|P45984|MK09_HUMAN Mitogen-activated protein kinase 9 OS=Homo sapiens GN=MAPK9 PE=1 SV=2;tr|E5RJ57|E5RJ57_HUMAN Mitogen-activated protein kinase 9 (Fragment) OS=Homo sapiens GN=MAPK9 PE=1 SV=7;tr|D6RAU3|D6RAU3_HUMAN Mitogen-activated protein kinase 10 (F	48139	0	47671	0	0	103280
P46063	P46063	ATP-dependent DNA helicase Q1	RECQL	sp|P46063|RECQ1_HUMAN ATP-dependent DNA helicase Q1 OS=Homo sapiens GN=RECQL PE=1 SV=3	73457	0	94055	0	106010	261400
P46777;Q5T7N0	P46777	60S ribosomal protein L5	RPL5	sp|P46777|RL5_HUMAN 60S ribosomal protein L5 OS=Homo sapiens GN=RPL5 PE=1 SV=3	34362	0	18018	2287800	965400	162370
P46821;D6RA32;D6RA40;D6RCL2;D6RGJ3;E9PGC8;P78559	P46821;D6RA32;D6RA40	Microtubule-associated protein 1B;MAP1B heavy chain;MAP1 light chain LC1	MAP1B	sp|P46821|MAP1B_HUMAN Microtubule-associated protein 1B OS=Homo sapiens GN=MAP1B PE=1 SV=2;tr|D6RA32|D6RA32_HUMAN Microtubule-associated protein 1B (Fragment) OS=Homo sapiens GN=MAP1B PE=1 SV=2;tr|D6RA40|D6RA40_HUMAN Microtubule-associated protein 1B (Frag	270.63	0	24155	227540	323900	382210
P47755;C9JUG7;F8W9N7;A0A0D9SET8	P47755;C9JUG7;F8W9N7;A0A0D9SET8	F-actin-capping protein subunit alpha-2	CAPZA2	sp|P47755|CAZA2_HUMAN F-actin-capping protein subunit alpha-2 OS=Homo sapiens GN=CAPZA2 PE=1 SV=3;tr|C9JUG7|C9JUG7_HUMAN F-actin-capping protein subunit alpha-2 OS=Homo sapiens GN=CAPZA2 PE=1 SV=1;tr|F8W9N7|F8W9N7_HUMAN F-actin-capping protein subunit alph	32949	0	92627	1479300	1692100	2351600
P47756;B1AK87;B1AK88;B1AK85	P47756;B1AK87;B1AK88;B1AK85	F-actin-capping protein subunit beta	CAPZB	sp|P47756|CAPZB_HUMAN F-actin-capping protein subunit beta OS=Homo sapiens GN=CAPZB PE=1 SV=4;tr|B1AK87|B1AK87_HUMAN Capping protein (Actin filament) muscle Z-line, beta, isoform CRA_a OS=Homo sapiens GN=CAPZB PE=1 SV=1;tr|B1AK88|B1AK88_HUMAN Capping prote	31.35	0	33152	984200	1140400	2010600
P47897;H7C0R3;B4DDN1;A0A0U1RRC8;A0A0U1RQX5;A0A0U1RQQ5;A0A0U1RQX9;A0A0U1RQM8;A0A0U1RQU2;A0A0U1RRI9;A0A0U1RQE9;A0A0U1RQL2;C9J165;A0A0U1RQT0;F2Z2V6	P47897;H7C0R3;B4DDN1	Glutamine--tRNA ligase	QARS	sp|P47897|SYQ_HUMAN Glutamine--tRNA ligase OS=Homo sapiens GN=QARS PE=1 SV=1;tr|H7C0R3|H7C0R3_HUMAN Glutamine--tRNA ligase (Fragment) OS=Homo sapiens GN=QARS PE=1 SV=1;tr|B4DDN1|B4DDN1_HUMAN Glutamine--tRNA ligase OS=Homo sapiens GN=QARS PE=1 SV=1	87798	0	47338	629410	1579100	1657200
P48047;H7C068;H7C0C1	P48047	ATP synthase subunit O, mitochondrial	ATP5O	sp|P48047|ATPO_HUMAN ATP synthase subunit O, mitochondrial OS=Homo sapiens GN=ATP5O PE=1 SV=1	23277	0	62493	107820	132790	101410
P48147	P48147	Prolyl endopeptidase	PREP	sp|P48147|PPCE_HUMAN Prolyl endopeptidase OS=Homo sapiens GN=PREP PE=1 SV=2	80699	0	81194	0	1165700	1416300
P48163	P48163	NADP-dependent malic enzyme	ME1	sp|P48163|MAOX_HUMAN NADP-dependent malic enzyme OS=Homo sapiens GN=ME1 PE=1 SV=1	64149	0	37034	0	84539	187350
P48735	P48735	Isocitrate dehydrogenase [NADP], mitochondrial	IDH2	sp|P48735|IDHP_HUMAN Isocitrate dehydrogenase [NADP], mitochondrial OS=Homo sapiens GN=IDH2 PE=1 SV=2	50909	0	210.09	2348100	9671400	5576900
P49189	P49189	4-trimethylaminobutyraldehyde dehydrogenase	ALDH9A1	sp|P49189|AL9A1_HUMAN 4-trimethylaminobutyraldehyde dehydrogenase OS=Homo sapiens GN=ALDH9A1 PE=1 SV=3	53801	0	84755	2387600	6977700	8027800
P49327;A0A0U1RQF0;A0A0U1RRG3	P49327;A0A0U1RQF0	Fatty acid synthase;[Acyl-carrier-protein] S-acetyltransferase;[Acyl-carrier-protein] S-malonyltransferase;3-oxoacyl-[acyl-carrier-protein] synthase;3-oxoacyl-[acyl-carrier-protein] reductase;3-hydroxyacyl-[acyl-carrier-protein] dehydratase;Enoyl-[acyl-carrier-protein] reductase;Oleoyl-[acyl-carrier-protein] hydrolase	FASN	sp|P49327|FAS_HUMAN Fatty acid synthase OS=Homo sapiens GN=FASN PE=1 SV=3;tr|A0A0U1RQF0|A0A0U1RQF0_HUMAN Fatty acid synthase OS=Homo sapiens GN=FASN PE=1 SV=1	273.42	0	136.31	455130	3781200	881660
P49368;B4DUR8;E9PM09;E9PRC8;Q5SZX6;E9PQ35;Q5SZX9;Q5SZW8	P49368;B4DUR8	T-complex protein 1 subunit gamma	CCT3	sp|P49368|TCPG_HUMAN T-complex protein 1 subunit gamma OS=Homo sapiens GN=CCT3 PE=1 SV=4;tr|B4DUR8|B4DUR8_HUMAN T-complex protein 1 subunit gamma OS=Homo sapiens GN=CCT3 PE=1 SV=1	60533	0	38045	859980	2419600	1221300
P49419;F8VS02;A0A140T9V3;A0A0J9YWF7;F8VVF2;H0YHM6	P49419;F8VS02;A0A140T9V3;A0A0J9YWF7	Alpha-aminoadipic semialdehyde dehydrogenase	ALDH7A1	sp|P49419|AL7A1_HUMAN Alpha-aminoadipic semialdehyde dehydrogenase OS=Homo sapiens GN=ALDH7A1 PE=1 SV=5;tr|F8VS02|F8VS02_HUMAN Alpha-aminoadipic semialdehyde dehydrogenase OS=Homo sapiens GN=ALDH7A1 PE=1 SV=1;tr|A0A140T9V3|A0A140T9V3_HUMAN Alpha-aminoadipi	58486	0	81665	578420	1639200	1721900
P49588;H3BPK7	P49588;H3BPK7	Alanine--tRNA ligase, cytoplasmic	AARS	sp|P49588|SYAC_HUMAN Alanine--tRNA ligase, cytoplasmic OS=Homo sapiens GN=AARS PE=1 SV=2;tr|H3BPK7|H3BPK7_HUMAN Alanine--tRNA ligase, cytoplasmic (Fragment) OS=Homo sapiens GN=AARS PE=1 SV=3	106.81	0	49996	0	143530	214320
Q5T5C7;P49591	Q5T5C7;P49591	Serine--tRNA ligase, cytoplasmic	SARS	tr|Q5T5C7|Q5T5C7_HUMAN Serine--tRNA ligase, cytoplasmic OS=Homo sapiens GN=SARS PE=1 SV=1;sp|P49591|SYSC_HUMAN Serine--tRNA ligase, cytoplasmic OS=Homo sapiens GN=SARS PE=1 SV=3	61312	0	10122	0	318320	437530
P49748;K7EQP4;G3V1M7;J3QRJ8;J3KSR4;K7EJW8;J3KS89;K7EMF8;J3QKU9	P49748	Very long-chain specific acyl-CoA dehydrogenase, mitochondrial	ACADVL	sp|P49748|ACADV_HUMAN Very long-chain specific acyl-CoA dehydrogenase, mitochondrial OS=Homo sapiens GN=ACADVL PE=1 SV=1	70389	0	112.14	2919800	5216300	3646200
P49841	P49841	Glycogen synthase kinase-3 beta	GSK3B	sp|P49841|GSK3B_HUMAN Glycogen synthase kinase-3 beta OS=Homo sapiens GN=GSK3B PE=1 SV=2	46744	0	58613	0	141210	202160
P49915	P49915	GMP synthase [glutamine-hydrolyzing]	GMPS	sp|P49915|GUAA_HUMAN GMP synthase [glutamine-hydrolyzing] OS=Homo sapiens GN=GMPS PE=1 SV=1	76715	0	9512	0	75336	132910
P50148	P50148	Guanine nucleotide-binding protein G(q) subunit alpha	GNAQ	sp|P50148|GNAQ_HUMAN Guanine nucleotide-binding protein G(q) subunit alpha OS=Homo sapiens GN=GNAQ PE=1 SV=4	42142	0.002455	16083	0	0	18094
P50395;Q5SX87;Q5SX86;V9GYF8;Q5SX90;Q5SX91;V9GYJ7	P50395;Q5SX87	Rab GDP dissociation inhibitor beta	GDI2	sp|P50395|GDIB_HUMAN Rab GDP dissociation inhibitor beta OS=Homo sapiens GN=GDI2 PE=1 SV=2;tr|Q5SX87|Q5SX87_HUMAN Rab GDP dissociation inhibitor beta (Fragment) OS=Homo sapiens GN=GDI2 PE=1 SV=1	50663	0	110.78	1261600	2715200	2989300
P50461	P50461	Cysteine and glycine-rich protein 3	CSRP3	sp|P50461|CSRP3_HUMAN Cysteine and glycine-rich protein 3 OS=Homo sapiens GN=CSRP3 PE=1 SV=1	20969	0	25695	0	0	571860
P50570;A0A0D9SFB1;A0A0U1RQP1;A0A0D9SFE4;Q05193;H7C5U0	P50570	Dynamin-2	DNM2	sp|P50570|DYN2_HUMAN Dynamin-2 OS=Homo sapiens GN=DNM2 PE=1 SV=2	98063	0	25.25	165670	198230	507490
P50990;H7C4C8;H7C2U0	P50990;H7C4C8	T-complex protein 1 subunit theta	CCT8	sp|P50990|TCPQ_HUMAN T-complex protein 1 subunit theta OS=Homo sapiens GN=CCT8 PE=1 SV=4;tr|H7C4C8|H7C4C8_HUMAN T-complex protein 1 subunit theta (Fragment) OS=Homo sapiens GN=CCT8 PE=1 SV=1	59.62	0	96622	2107800	2600600	2015500
P50991	P50991	T-complex protein 1 subunit delta	CCT4	sp|P50991|TCPD_HUMAN T-complex protein 1 subunit delta OS=Homo sapiens GN=CCT4 PE=1 SV=4	57924	0	42144	1058700	1418200	1685400
P50995;H0Y6E1;E5RIN3;P27216	P50995	Annexin A11	ANXA11	sp|P50995|ANX11_HUMAN Annexin A11 OS=Homo sapiens GN=ANXA11 PE=1 SV=1	54389	0	55882	7433000	1866400	2609500
P51149;C9J592;C9J8S3;C9J4S4;C9IZZ0;C9J4V0;C9J7D1	P51149;C9J592;C9J8S3;C9J4S4;C9IZZ0;C9J4V0;C9J7D1	Ras-related protein Rab-7a	RAB7A	sp|P51149|RAB7A_HUMAN Ras-related protein Rab-7a OS=Homo sapiens GN=RAB7A PE=1 SV=1;tr|C9J592|C9J592_HUMAN Ras-related protein Rab-7a (Fragment) OS=Homo sapiens GN=RAB7A PE=1 SV=1;tr|C9J8S3|C9J8S3_HUMAN Ras-related protein Rab-7a OS=Homo sapiens GN=RAB7A P	23489	0	79313	1888900	2421100	2025600
P51452;K7ELG5;K7ES89	P51452;K7ELG5;K7ES89	Dual specificity protein phosphatase 3	DUSP3	sp|P51452|DUS3_HUMAN Dual specificity protein phosphatase 3 OS=Homo sapiens GN=DUSP3 PE=1 SV=1;tr|K7ELG5|K7ELG5_HUMAN Dual-specificity protein phosphatase 3 (Fragment) OS=Homo sapiens GN=DUSP3 PE=1 SV=1;tr|K7ES89|K7ES89_HUMAN Dual-specificity protein phosp	20478	0	16365	0	0	272210
P51570	P51570	Galactokinase	GALK1	sp|P51570|GALK1_HUMAN Galactokinase OS=Homo sapiens GN=GALK1 PE=1 SV=1	42272	0	22226	153730	186210	483060
P51665;H3BQV2;H3BNT7;H3BTM8	P51665	26S proteasome non-ATPase regulatory subunit 7	PSMD7	sp|P51665|PSMD7_HUMAN 26S proteasome non-ATPase regulatory subunit 7 OS=Homo sapiens GN=PSMD7 PE=1 SV=2	37025	0	18085	0	357440	227000
P51812	P51812	Ribosomal protein S6 kinase alpha-3	RPS6KA3	sp|P51812|KS6A3_HUMAN Ribosomal protein S6 kinase alpha-3 OS=Homo sapiens GN=RPS6KA3 PE=1 SV=1	83735	0	34767	0	675400	292480
P51857	P51857	3-oxo-5-beta-steroid 4-dehydrogenase	AKR1D1	sp|P51857|AK1D1_HUMAN 3-oxo-5-beta-steroid 4-dehydrogenase OS=Homo sapiens GN=AKR1D1 PE=1 SV=1	37376	0.0017197	21082	0	0	242230
P51888	P51888	Prolargin	PRELP	sp|P51888|PRELP_HUMAN Prolargin OS=Homo sapiens GN=PRELP PE=1 SV=1	43809	0	62532	120390	176530	336950
P52179;A8MX12;J3KRK2	P52179;A8MX12	Myomesin-1	MYOM1	sp|P52179|MYOM1_HUMAN Myomesin-1 OS=Homo sapiens GN=MYOM1 PE=1 SV=2;tr|A8MX12|A8MX12_HUMAN Myomesin-1 OS=Homo sapiens GN=MYOM1 PE=1 SV=3	187.62	0	323.31	14081000	23671000	33189000
P52209;K7EMN2;K7EM49;K7EPF6;K7ELN9	P52209	6-phosphogluconate dehydrogenase, decarboxylating	PGD	sp|P52209|6PGD_HUMAN 6-phosphogluconate dehydrogenase, decarboxylating OS=Homo sapiens GN=PGD PE=1 SV=3	53139	0	43491	232090	613620	933000
P52907	P52907	F-actin-capping protein subunit alpha-1	CAPZA1	sp|P52907|CAZA1_HUMAN F-actin-capping protein subunit alpha-1 OS=Homo sapiens GN=CAPZA1 PE=1 SV=3	32922	0	16573	0	159020	206400
P53004;C9J1E1	P53004	Biliverdin reductase A	BLVRA	sp|P53004|BIEA_HUMAN Biliverdin reductase A OS=Homo sapiens GN=BLVRA PE=1 SV=2	33428	0	41157	111550	1150500	1361900
P53396	P53396	ATP-citrate synthase	ACLY	sp|P53396|ACLY_HUMAN ATP-citrate synthase OS=Homo sapiens GN=ACLY PE=1 SV=3	120.84	0	44645	113260	466190	249130
P53582	P53582	Methionine aminopeptidase 1	METAP1	sp|P53582|MAP11_HUMAN Methionine aminopeptidase 1 OS=Homo sapiens GN=METAP1 PE=1 SV=2	43215	0	32611	0	0	84034
P53618;E9PP73;E9PP63;E9PKQ1	P53618;E9PP73	Coatomer subunit beta	COPB1	sp|P53618|COPB_HUMAN Coatomer subunit beta OS=Homo sapiens GN=COPB1 PE=1 SV=3;tr|E9PP73|E9PP73_HUMAN Coatomer subunit beta (Fragment) OS=Homo sapiens GN=COPB1 PE=1 SV=7	107.14	0	62627	501090	222530	214510
P53621	P53621	Coatomer subunit alpha;Xenin;Proxenin	COPA	sp|P53621|COPA_HUMAN Coatomer subunit alpha OS=Homo sapiens GN=COPA PE=1 SV=2	138.34	0	88518	710190	1148800	773170
P54136;E5RH09;E5RJM9	P54136	Arginine--tRNA ligase, cytoplasmic	RARS	sp|P54136|SYRC_HUMAN Arginine--tRNA ligase, cytoplasmic OS=Homo sapiens GN=RARS PE=1 SV=2	75378	0	87209	562300	899820	1009300
P54289;E7ERK3;H0Y715;C9JE82;C9JVC9;Q9NY47	P54289;E7ERK3	Voltage-dependent calcium channel subunit alpha-2/delta-1;Voltage-dependent calcium channel subunit alpha-2-1;Voltage-dependent calcium channel subunit delta-1	CACNA2D1	sp|P54289|CA2D1_HUMAN Voltage-dependent calcium channel subunit alpha-2/delta-1 OS=Homo sapiens GN=CACNA2D1 PE=1 SV=3;tr|E7ERK3|E7ERK3_HUMAN Voltage-dependent calcium channel subunit alpha-2/delta-1 OS=Homo sapiens GN=CACNA2D1 PE=1 SV=1	124.57	0	40649	803170	83375	94300
P54296;E7EWH9;A0A0J9YVV7	P54296;E7EWH9;A0A0J9YVV7	Myomesin-2	MYOM2	sp|P54296|MYOM2_HUMAN Myomesin-2 OS=Homo sapiens GN=MYOM2 PE=1 SV=2;tr|E7EWH9|E7EWH9_HUMAN Myomesin-2 OS=Homo sapiens GN=MYOM2 PE=1 SV=2;tr|A0A0J9YVV7|A0A0J9YVV7_HUMAN Myomesin-2 OS=Homo sapiens GN=MYOM2 PE=1 SV=1	164.89	0	323.31	31805000	45850000	49695000
P54652	P54652	Heat shock-related 70 kDa protein 2	HSPA2	sp|P54652|HSP72_HUMAN Heat shock-related 70 kDa protein 2 OS=Homo sapiens GN=HSPA2 PE=1 SV=1	70.02	0	40557	541930	804420	878550
P54709;H7C4L9;H7C547;F8WBY4;C9JA36	P54709;H7C4L9;H7C547;F8WBY4;C9JA36	Sodium/potassium-transporting ATPase subunit beta-3	ATP1B3	sp|P54709|AT1B3_HUMAN Sodium/potassium-transporting ATPase subunit beta-3 OS=Homo sapiens GN=ATP1B3 PE=1 SV=1;tr|H7C4L9|H7C4L9_HUMAN Sodium/potassium-transporting ATPase subunit beta-3 (Fragment) OS=Homo sapiens GN=ATP1B3 PE=1 SV=1;tr|H7C547|H7C547_HUMAN S	31512	0	53897	0	109960	88355
P55010	P55010	Eukaryotic translation initiation factor 5	EIF5	sp|P55010|IF5_HUMAN Eukaryotic translation initiation factor 5 OS=Homo sapiens GN=EIF5 PE=1 SV=2	49222	0	94158	0	48537	51266
P55060	P55060	Exportin-2	CSE1L	sp|P55060|XPO2_HUMAN Exportin-2 OS=Homo sapiens GN=CSE1L PE=1 SV=3	110.42	0	72329	810940	1202100	1930700
P55072;C9JUP7;C9IZA5	P55072	Transitional endoplasmic reticulum ATPase	VCP	sp|P55072|TERA_HUMAN Transitional endoplasmic reticulum ATPase OS=Homo sapiens GN=VCP PE=1 SV=4	89321	0	166.6	5489400	2569100	3914100
P55084;C9JEY0;C9JE81;B5MD38;C9K0M0;F5GZQ3	P55084;C9JEY0;C9JE81;B5MD38	Trifunctional enzyme subunit beta, mitochondrial;3-ketoacyl-CoA thiolase	HADHB	sp|P55084|ECHB_HUMAN Trifunctional enzyme subunit beta, mitochondrial OS=Homo sapiens GN=HADHB PE=1 SV=3;tr|C9JEY0|C9JEY0_HUMAN Trifunctional enzyme subunit beta, mitochondrial (Fragment) OS=Homo sapiens GN=HADHB PE=1 SV=7;tr|C9JE81|C9JE81_HUMAN Trifunctio	51294	0	59925	159050	173590	134340
P55263	P55263	Adenosine kinase	ADK	sp|P55263|ADK_HUMAN Adenosine kinase OS=Homo sapiens GN=ADK PE=1 SV=2	40545	0	13621	0	410590	388220
P55809;E9PDW2;Q9BYC2	P55809;E9PDW2	Succinyl-CoA:3-ketoacid coenzyme A transferase 1, mitochondrial	OXCT1	sp|P55809|SCOT1_HUMAN Succinyl-CoA:3-ketoacid coenzyme A transferase 1, mitochondrial OS=Homo sapiens GN=OXCT1 PE=1 SV=1;tr|E9PDW2|E9PDW2_HUMAN Succinyl-CoA:3-ketoacid coenzyme A transferase 1, mitochondrial OS=Homo sapiens GN=OXCT1 PE=1 SV=1	56157	0	160.88	2422200	2214900	740370
P55884;C9JQN7;C9JZG1	P55884	Eukaryotic translation initiation factor 3 subunit B	EIF3B	sp|P55884|EIF3B_HUMAN Eukaryotic translation initiation factor 3 subunit B OS=Homo sapiens GN=EIF3B PE=1 SV=3	92.48	0	34885	336720	826840	1122100
P56192;F5H2V6;H0YHV5	P56192	Methionine--tRNA ligase, cytoplasmic	MARS	sp|P56192|SYMC_HUMAN Methionine--tRNA ligase, cytoplasmic OS=Homo sapiens GN=MARS PE=1 SV=2	101.11	0.00090498	24684	0	158620	108800
P56199	P56199	Integrin alpha-1	ITGA1	sp|P56199|ITA1_HUMAN Integrin alpha-1 OS=Homo sapiens GN=ITGA1 PE=1 SV=2	130.85	0.00090992	25009	0	19347	82182
P60174;U3KPZ0;U3KQF3;U3KPS5	P60174;U3KPZ0	Triosephosphate isomerase	TPI1	sp|P60174|TPIS_HUMAN Triosephosphate isomerase OS=Homo sapiens GN=TPI1 PE=1 SV=3;tr|U3KPZ0|U3KPZ0_HUMAN Triosephosphate isomerase (Fragment) OS=Homo sapiens GN=TPI1 PE=1 SV=1	30791	0	35731	1026400	1058300	1308100
P60228;E5RGA2;H0YBR5;E5RIT4;H0YAW4;E5RHS5;H0YBP5;E5RII3;E5RIP5;E5RJ25	P60228;E5RGA2;H0YBR5	Eukaryotic translation initiation factor 3 subunit E	EIF3E	sp|P60228|EIF3E_HUMAN Eukaryotic translation initiation factor 3 subunit E OS=Homo sapiens GN=EIF3E PE=1 SV=1;tr|E5RGA2|E5RGA2_HUMAN Eukaryotic translation initiation factor 3 subunit E OS=Homo sapiens GN=EIF3E PE=1 SV=1;tr|H0YBR5|H0YBR5_HUMAN Eukaryotic t	52.22	0	33261	375850	464000	543200
P63261;P60709;I3L3I0;I3L1U9;I3L4N8;G5E9R0;K7EM38;I3L3R2;E7EVS6;J3KT65;C9JUM1;C9JZR7;Q6S8J3;A5A3E0;P0CG38;P0CG39;Q9BYX7;F8WCH0	P63261;P60709;I3L3I0;I3L1U9	Actin, cytoplasmic 2;Actin, cytoplasmic 2, N-terminally processed;Actin, cytoplasmic 1;Actin, cytoplasmic 1, N-terminally processed	ACTG1;ACTB	sp|P63261|ACTG_HUMAN Actin, cytoplasmic 2 OS=Homo sapiens GN=ACTG1 PE=1 SV=1;sp|P60709|ACTB_HUMAN Actin, cytoplasmic 1 OS=Homo sapiens GN=ACTB PE=1 SV=1;tr|I3L3I0|I3L3I0_HUMAN Actin, cytoplasmic 2 (Fragment) OS=Homo sapiens GN=ACTG1 PE=1 SV=1;tr|I3L1U9|I3L	41792	0	132.9	20223000	18707000	19547000
P60842;J3KT12;J3QS69;J3KSZ0;J3KTB5;J3QL43;J3KTN0;J3QR64;J3QLN6;J3KS25;J3QKZ9;J3QL52;J3QQP0;E9PBH4;F8WE11;I3L3H2	P60842;J3KT12;J3QS69;J3KSZ0;J3KTB5;J3QL43	Eukaryotic initiation factor 4A-I	EIF4A1	sp|P60842|IF4A1_HUMAN Eukaryotic initiation factor 4A-I OS=Homo sapiens GN=EIF4A1 PE=1 SV=1;tr|J3KT12|J3KT12_HUMAN Eukaryotic initiation factor 4A-I OS=Homo sapiens GN=EIF4A1 PE=1 SV=1;tr|J3QS69|J3QS69_HUMAN Eukaryotic initiation factor 4A-I (Fragment) OS=	46153	0	45	674190	1552300	1238800
P60903	P60903	Protein S100-A10	S100A10	sp|P60903|S10AA_HUMAN Protein S100-A10 OS=Homo sapiens GN=S100A10 PE=1 SV=2	11203	0	26201	298660	148640	583740
P60953;Q5JYX0	P60953;Q5JYX0	Cell division control protein 42 homolog	CDC42	sp|P60953|CDC42_HUMAN Cell division control protein 42 homolog OS=Homo sapiens GN=CDC42 PE=1 SV=2;tr|Q5JYX0|Q5JYX0_HUMAN Cell division control protein 42 homolog (Fragment) OS=Homo sapiens GN=CDC42 PE=1 SV=1	21258	0	17123	0	0	124910
P61019;Q5HYI5;Q8WUD1;E9PKL7;H7C125;Q6PIK3;H0YD31	P61019;Q5HYI5;Q8WUD1;E9PKL7	Ras-related protein Rab-2A;Ras-related protein Rab-2B	RAB2A;DKFZp313C1541;RAB2B	sp|P61019|RAB2A_HUMAN Ras-related protein Rab-2A OS=Homo sapiens GN=RAB2A PE=1 SV=1;tr|Q5HYI5|Q5HYI5_HUMAN Putative uncharacterized protein DKFZp313C1541 OS=Homo sapiens GN=DKFZp313C1541 PE=1 SV=1;sp|Q8WUD1|RAB2B_HUMAN Ras-related protein Rab-2B OS=Homo sa	23545	0	75417	630360	944000	1029500
P61020;F8VUA5;F8WCY6;F8WD79;F8VPW9;F8VSF8;F8VWZ7;F8VWU4;F8VVZ0;F8VVK3;K7ERI8;K7ERQ8;P20339;P51148	P61020;F8VUA5	Ras-related protein Rab-5B	RAB5B	sp|P61020|RAB5B_HUMAN Ras-related protein Rab-5B OS=Homo sapiens GN=RAB5B PE=1 SV=1;tr|F8VUA5|F8VUA5_HUMAN Ras-related protein Rab-5B (Fragment) OS=Homo sapiens GN=RAB5B PE=1 SV=1	23707	0	10751	0	291050	458070
P61026	P61026	Ras-related protein Rab-10	RAB10	sp|P61026|RAB10_HUMAN Ras-related protein Rab-10 OS=Homo sapiens GN=RAB10 PE=1 SV=1	22541	0	12753	0	0	49794
P61081;M0QX69	P61081;M0QX69	NEDD8-conjugating enzyme Ubc12	UBE2M	sp|P61081|UBC12_HUMAN NEDD8-conjugating enzyme Ubc12 OS=Homo sapiens GN=UBE2M PE=1 SV=1;tr|M0QX69|M0QX69_HUMAN NEDD8-conjugating enzyme Ubc12 (Fragment) OS=Homo sapiens GN=UBE2M PE=1 SV=7	20.9	0	92392	88899	227790	169160
X6RFL8;P61106	X6RFL8;P61106	Ras-related protein Rab-14	RAB14	tr|X6RFL8|X6RFL8_HUMAN Ras-related protein Rab-14 (Fragment) OS=Homo sapiens GN=RAB14 PE=1 SV=1;sp|P61106|RAB14_HUMAN Ras-related protein Rab-14 OS=Homo sapiens GN=RAB14 PE=1 SV=4	20409	0	74577	229510	797500	995920
P61160;F5H6T1	P61160;F5H6T1	Actin-related protein 2	ACTR2	sp|P61160|ARP2_HUMAN Actin-related protein 2 OS=Homo sapiens GN=ACTR2 PE=1 SV=1;tr|F5H6T1|F5H6T1_HUMAN ARP2 actin-related protein 2 homolog (Yeast), isoform CRA_d OS=Homo sapiens GN=ACTR2 PE=1 SV=2	44.76	0	39352	1051200	1479700	1707000
P61163;R4GMT0	P61163;R4GMT0	Alpha-centractin	ACTR1A	sp|P61163|ACTZ_HUMAN Alpha-centractin OS=Homo sapiens GN=ACTR1A PE=1 SV=1;tr|R4GMT0|R4GMT0_HUMAN Alpha-centractin OS=Homo sapiens GN=ACTR1A PE=1 SV=1	42613	0	67956	800790	2096300	1376100
P84077;P61204;F5H423;F5H0C7;C9J1Z8;P84085;F5H1V1;F5H6T5;F8WDB3;H0YGG7	P84077;P61204;F5H423;F5H0C7;C9J1Z8;P84085	ADP-ribosylation factor 1;ADP-ribosylation factor 3;ADP-ribosylation factor 5	ARF1;ARF3;ARF5	sp|P84077|ARF1_HUMAN ADP-ribosylation factor 1 OS=Homo sapiens GN=ARF1 PE=1 SV=2;sp|P61204|ARF3_HUMAN ADP-ribosylation factor 3 OS=Homo sapiens GN=ARF3 PE=1 SV=2;tr|F5H423|F5H423_HUMAN Uncharacterized protein OS=Homo sapiens PE=3 SV=1;tr|F5H0C7|F5H0C7_HUMA	20697	0	103.03	453840	2334300	5197900
P61221;D6R9I9;H0Y990;D6RGF4	P61221;D6R9I9	ATP-binding cassette sub-family E member 1	ABCE1	sp|P61221|ABCE1_HUMAN ATP-binding cassette sub-family E member 1 OS=Homo sapiens GN=ABCE1 PE=1 SV=1;tr|D6R9I9|D6R9I9_HUMAN ATP-binding cassette sub-family E member 1 OS=Homo sapiens GN=ABCE1 PE=1 SV=1	67314	0	42191	156190	426530	307300
P62834;P61224;A0A0J9YXB3;A6NIZ1;F5H4H0;F5GYH7;F5H077;F5GWU8;F5H491;F5H0B7;F5H500;F5H6R7;F5H004;A0A075B6Q0;F5GYB5;F5GX62;E7ESV4;F5H7Y6;F8WBC0;F5H823;B7ZB78;F5GZG1	P62834;P61224;A0A0J9YXB3;A6NIZ1;F5H4H0;F5GYH7;F5H077;F5GWU8;F5H491;F5H0B7;F5H500;F5H6R7;F5H004;A0A075B6Q0;F5GYB5;F5GX62;E7ESV4;F5H7Y6	Ras-related protein Rap-1A;Ras-related protein Rap-1b;Ras-related protein Rap-1b-like protein	RAP1A;RAP1B	sp|P62834|RAP1A_HUMAN Ras-related protein Rap-1A OS=Homo sapiens GN=RAP1A PE=1 SV=1;sp|P61224|RAP1B_HUMAN Ras-related protein Rap-1b OS=Homo sapiens GN=RAP1B PE=1 SV=1;tr|A0A0J9YXB3|A0A0J9YXB3_HUMAN Uncharacterized protein OS=Homo sapiens PE=4 SV=1;sp|A6NI	20987	0	50403	0	677460	830530
P61225;F6U784;Q9Y3L5;P10114	P61225	Ras-related protein Rap-2b	RAP2B	sp|P61225|RAP2B_HUMAN Ras-related protein Rap-2b OS=Homo sapiens GN=RAP2B PE=1 SV=1	20504	0	7699	79785	102210	136460
P61353;K7EQQ9;K7ELC7;K7ERY7	P61353;K7EQQ9;K7ELC7	60S ribosomal protein L27	RPL27	sp|P61353|RL27_HUMAN 60S ribosomal protein L27 OS=Homo sapiens GN=RPL27 PE=1 SV=2;tr|K7EQQ9|K7EQQ9_HUMAN 60S ribosomal protein L27 OS=Homo sapiens GN=RPL27 PE=1 SV=1;tr|K7ELC7|K7ELC7_HUMAN 60S ribosomal protein L27 (Fragment) OS=Homo sapiens GN=RPL27 PE=1	15798	0	40817	1090400	444390	232170
P61586;C9JRM1;C9JNR4;C9JX21	P61586;C9JRM1;C9JNR4;C9JX21	Transforming protein RhoA	RHOA	sp|P61586|RHOA_HUMAN Transforming protein RhoA OS=Homo sapiens GN=RHOA PE=1 SV=1;tr|C9JRM1|C9JRM1_HUMAN Transforming protein RhoA OS=Homo sapiens GN=RHOA PE=1 SV=1;tr|C9JNR4|C9JNR4_HUMAN Transforming protein RhoA (Fragment) OS=Homo sapiens GN=RHOA PE=1 SV=	21768	0	31761	0	131690	163970
P61970;H3BRV9	P61970;H3BRV9	Nuclear transport factor 2	NUTF2	sp|P61970|NTF2_HUMAN Nuclear transport factor 2 OS=Homo sapiens GN=NUTF2 PE=1 SV=1;tr|H3BRV9|H3BRV9_HUMAN Nuclear transport factor 2 (Fragment) OS=Homo sapiens GN=NUTF2 PE=1 SV=1	14478	0	47483	351130	372440	1448000
Q5T6W2;P61978;S4R359	Q5T6W2;P61978	Heterogeneous nuclear ribonucleoprotein K	HNRNPK	tr|Q5T6W2|Q5T6W2_HUMAN Heterogeneous nuclear ribonucleoprotein K (Fragment) OS=Homo sapiens GN=HNRNPK PE=1 SV=1;sp|P61978|HNRPK_HUMAN Heterogeneous nuclear ribonucleoprotein K OS=Homo sapiens GN=HNRNPK PE=1 SV=1	41807	0	24524	247020	360920	573630
P61981	P61981	14-3-3 protein gamma;14-3-3 protein gamma, N-terminally processed	YWHAG	sp|P61981|1433G_HUMAN 14-3-3 protein gamma OS=Homo sapiens GN=YWHAG PE=1 SV=2	28302	0	107.51	1562100	710370	944990
P62140;C9J9S3;C9JP48;E7ETD8;F8WE71;F5H1L6;F5H037	P62140;C9J9S3;C9JP48;E7ETD8	Serine/threonine-protein phosphatase PP1-beta catalytic subunit;Serine/threonine-protein phosphatase	PPP1CB	sp|P62140|PP1B_HUMAN Serine/threonine-protein phosphatase PP1-beta catalytic subunit OS=Homo sapiens GN=PPP1CB PE=1 SV=3;tr|C9J9S3|C9J9S3_HUMAN Serine/threonine-protein phosphatase (Fragment) OS=Homo sapiens GN=PPP1CB PE=1 SV=1;tr|C9JP48|C9JP48_HUMAN Serin	37186	0	49437	0	2371600	3186200
P62191	P62191	26S protease regulatory subunit 4	PSMC1	sp|P62191|PRS4_HUMAN 26S protease regulatory subunit 4 OS=Homo sapiens GN=PSMC1 PE=1 SV=1	49184	0	56733	0	1220300	1049700
P62195;J3QSA9;J3QQM1;J3QLH6;J3KRP2;J3QSE0;J3QRR3;J3QRW1	P62195;J3QSA9;J3QQM1;J3QLH6;J3KRP2	26S protease regulatory subunit 8	PSMC5	sp|P62195|PRS8_HUMAN 26S protease regulatory subunit 8 OS=Homo sapiens GN=PSMC5 PE=1 SV=1;tr|J3QSA9|J3QSA9_HUMAN 26S protease regulatory subunit 8 (Fragment) OS=Homo sapiens GN=PSMC5 PE=1 SV=1;tr|J3QQM1|J3QQM1_HUMAN 26S protease regulatory subunit 8 (Fragm	45626	0	112.05	62609	831080	849220
Q5JR95;P62241	Q5JR95;P62241	40S ribosomal protein S8	RPS8	tr|Q5JR95|Q5JR95_HUMAN 40S ribosomal protein S8 OS=Homo sapiens GN=RPS8 PE=1 SV=1;sp|P62241|RS8_HUMAN 40S ribosomal protein S8 OS=Homo sapiens GN=RPS8 PE=1 SV=2	21879	0	56621	1754400	480180	497020
P62258;K7EM20;B4DJF2;I3L3T1;K7EIT4;I3L0W5	P62258;K7EM20	14-3-3 protein epsilon	YWHAE	sp|P62258|1433E_HUMAN 14-3-3 protein epsilon OS=Homo sapiens GN=YWHAE PE=1 SV=1;tr|K7EM20|K7EM20_HUMAN 14-3-3 protein epsilon (Fragment) OS=Homo sapiens GN=YWHAE PE=1 SV=1	29174	0	72584	2748000	1288900	1899900
P62266;D6RD47	P62266;D6RD47	40S ribosomal protein S23	RPS23	sp|P62266|RS23_HUMAN 40S ribosomal protein S23 OS=Homo sapiens GN=RPS23 PE=1 SV=3;tr|D6RD47|D6RD47_HUMAN 40S ribosomal protein S23 OS=Homo sapiens GN=RPS23 PE=1 SV=1	15807	0	17365	209950	188820	239270
P62269;A0A0G2JQH2;Q5GGW2;J3JS69	P62269	40S ribosomal protein S18	RPS18	sp|P62269|RS18_HUMAN 40S ribosomal protein S18 OS=Homo sapiens GN=RPS18 PE=1 SV=3	17718	0	19937	1049900	1281900	1062500
P62277;J3KMX5;E9PS50	P62277;J3KMX5	40S ribosomal protein S13	RPS13	sp|P62277|RS13_HUMAN 40S ribosomal protein S13 OS=Homo sapiens GN=RPS13 PE=1 SV=2;tr|J3KMX5|J3KMX5_HUMAN 40S ribosomal protein S13 OS=Homo sapiens GN=RPS13 PE=1 SV=1	17222	0	15473	0	697830	685230
P62304	P62304	Small nuclear ribonucleoprotein E	SNRPE	sp|P62304|RUXE_HUMAN Small nuclear ribonucleoprotein E OS=Homo sapiens GN=SNRPE PE=1 SV=1	10803	0.00087413	21971	0	0	35764
P62424;Q5T8U2;Q5T8U3	P62424;Q5T8U2;Q5T8U3	60S ribosomal protein L7a	RPL7A	sp|P62424|RL7A_HUMAN 60S ribosomal protein L7a OS=Homo sapiens GN=RPL7A PE=1 SV=2;tr|Q5T8U2|Q5T8U2_HUMAN 60S ribosomal protein L7a OS=Homo sapiens GN=RPL7A PE=1 SV=1;tr|Q5T8U3|Q5T8U3_HUMAN 60S ribosomal protein L7a (Fragment) OS=Homo sapiens GN=RPL7A PE=1	29995	0	24527	1091400	195610	286920
P62701;C9JEH7;P22090;Q8TD47	P62701	40S ribosomal protein S4, X isoform	RPS4X	sp|P62701|RS4X_HUMAN 40S ribosomal protein S4, X isoform OS=Homo sapiens GN=RPS4X PE=1 SV=2	29597	0	60818	1593800	2222900	1695700
P67775;P62714;E5RFI3;E5RHP4;E7ESG8;E5RHC1;H0YBN9;H0YC23	P67775;P62714;E5RFI3;E5RHP4;E7ESG8;E5RHC1	Serine/threonine-protein phosphatase 2A catalytic subunit alpha isoform;Serine/threonine-protein phosphatase 2A catalytic subunit beta isoform;Serine/threonine-protein phosphatase	PPP2CA;PPP2CB	sp|P67775|PP2AA_HUMAN Serine/threonine-protein phosphatase 2A catalytic subunit alpha isoform OS=Homo sapiens GN=PPP2CA PE=1 SV=1;sp|P62714|PP2AB_HUMAN Serine/threonine-protein phosphatase 2A catalytic subunit beta isoform OS=Homo sapiens GN=PPP2CB PE=1 SV	35594	0	66093	0	1577300	1951700
P62736;P63267;F6UVQ4;F6QUT6;C9JFL5;C9JTX5;F8WB63;B8ZZJ2	P62736;P63267	Actin, aortic smooth muscle;Actin, gamma-enteric smooth muscle	ACTA2;ACTG2	sp|P62736|ACTA_HUMAN Actin, aortic smooth muscle OS=Homo sapiens GN=ACTA2 PE=1 SV=1;sp|P63267|ACTH_HUMAN Actin, gamma-enteric smooth muscle OS=Homo sapiens GN=ACTG2 PE=1 SV=1	42009	0	26908	0	0	483950
P62753;A2A3R7;A2A3R5	P62753;A2A3R7;A2A3R5	40S ribosomal protein S6	RPS6	sp|P62753|RS6_HUMAN 40S ribosomal protein S6 OS=Homo sapiens GN=RPS6 PE=1 SV=1;tr|A2A3R7|A2A3R7_HUMAN 40S ribosomal protein S6 OS=Homo sapiens GN=RPS6 PE=1 SV=1;tr|A2A3R5|A2A3R5_HUMAN 40S ribosomal protein S6 OS=Homo sapiens GN=RPS6 PE=1 SV=1	28.68	0	37926	0	0	269250
P62805	P62805	Histone H4	HIST1H4A	sp|P62805|H4_HUMAN Histone H4 OS=Homo sapiens GN=HIST1H4A PE=1 SV=2	11367	0	51191	26742000	5417500	15158000
P62820;E7END7	P62820;E7END7	Ras-related protein Rab-1A	RAB1A	sp|P62820|RAB1A_HUMAN Ras-related protein Rab-1A OS=Homo sapiens GN=RAB1A PE=1 SV=3;tr|E7END7|E7END7_HUMAN Ras-related protein Rab-1A OS=Homo sapiens GN=RAB1A PE=1 SV=1	22677	0	36.9	585920	1060000	1472300
P62854;Q5JNZ5	P62854;Q5JNZ5	40S ribosomal protein S26;Putative 40S ribosomal protein S26-like 1	RPS26;RPS26P11	sp|P62854|RS26_HUMAN 40S ribosomal protein S26 OS=Homo sapiens GN=RPS26 PE=1 SV=3;sp|Q5JNZ5|RS26L_HUMAN Putative 40S ribosomal protein S26-like 1 OS=Homo sapiens GN=RPS26P11 PE=5 SV=1	13015	0	11066	788050	362320	712110
P62906	P62906	60S ribosomal protein L10a	RPL10A	sp|P62906|RL10A_HUMAN 60S ribosomal protein L10a OS=Homo sapiens GN=RPL10A PE=1 SV=2	24831	0	41941	1100400	1990800	802430
Q5VVC9;Q5VVC8;P62913	Q5VVC9;Q5VVC8;P62913	60S ribosomal protein L11	RPL11	tr|Q5VVC9|Q5VVC9_HUMAN 60S ribosomal protein L11 (Fragment) OS=Homo sapiens GN=RPL11 PE=1 SV=1;tr|Q5VVC8|Q5VVC8_HUMAN 60S ribosomal protein L11 (Fragment) OS=Homo sapiens GN=RPL11 PE=1 SV=1;sp|P62913|RL11_HUMAN 60S ribosomal protein L11 OS=Homo sapiens GN=	14923	0	15059	0	0	95449
P62937;F8WE65;C9J5S7;E5RIZ5	P62937;F8WE65;C9J5S7	Peptidyl-prolyl cis-trans isomerase A;Peptidyl-prolyl cis-trans isomerase A, N-terminally processed;Peptidyl-prolyl cis-trans isomerase	PPIA	sp|P62937|PPIA_HUMAN Peptidyl-prolyl cis-trans isomerase A OS=Homo sapiens GN=PPIA PE=1 SV=2;tr|F8WE65|F8WE65_HUMAN Peptidyl-prolyl cis-trans isomerase OS=Homo sapiens GN=PPIA PE=1 SV=1;tr|C9J5S7|C9J5S7_HUMAN Peptidyl-prolyl cis-trans isomerase OS=Homo sap	18012	0	31409	625000	948290	1213900
P63000;J3KSC4;J3QLK0;B1AH77;B1AH80;P60763;P15153	P63000;J3KSC4;J3QLK0;B1AH77;B1AH80;P60763;P15153	Ras-related C3 botulinum toxin substrate 1;Ras-related C3 botulinum toxin substrate 3;Ras-related C3 botulinum toxin substrate 2	RAC1;RAC3;RAC2	sp|P63000|RAC1_HUMAN Ras-related C3 botulinum toxin substrate 1 OS=Homo sapiens GN=RAC1 PE=1 SV=1;tr|J3KSC4|J3KSC4_HUMAN Ras-related C3 botulinum toxin substrate 3 (Fragment) OS=Homo sapiens GN=RAC3 PE=1 SV=1;tr|J3QLK0|J3QLK0_HUMAN Ras-related C3 botulinum	21.45	0	29686	813070	0	347780
P63092;Q5JWF2;A0A0A0MR13;S4R3E3;A0A087WTB6;A2A2R6;Q5JWD1;H0Y7E8;A0A087WZE5;Q5JWE9;H0Y7F4;P38405	P63092;Q5JWF2	Guanine nucleotide-binding protein G(s) subunit alpha isoforms short;Guanine nucleotide-binding protein G(s) subunit alpha isoforms XLas	GNAS	sp|P63092|GNAS2_HUMAN Guanine nucleotide-binding protein G(s) subunit alpha isoforms short OS=Homo sapiens GN=GNAS PE=1 SV=1;sp|Q5JWF2|GNAS1_HUMAN Guanine nucleotide-binding protein G(s) subunit alpha isoforms XLas OS=Homo sapiens GN=GNAS PE=1 SV=2	45664	0	12819	1291000	369070	667190
P63104;E7EX29;B0AZS6;B7Z2E6;H0YB80;E7ESK7;E5RGE1;E5RIR4;E9PD24;E7EVZ2	P63104;E7EX29;B0AZS6;B7Z2E6;H0YB80;E7ESK7	14-3-3 protein zeta/delta	YWHAZ	sp|P63104|1433Z_HUMAN 14-3-3 protein zeta/delta OS=Homo sapiens GN=YWHAZ PE=1 SV=1;tr|E7EX29|E7EX29_HUMAN 14-3-3 protein zeta/delta (Fragment) OS=Homo sapiens GN=YWHAZ PE=1 SV=1;tr|B0AZS6|B0AZS6_HUMAN 14-3-3 protein zeta/delta OS=Homo sapiens GN=YWHAZ PE=1	27745	0	160.83	1399100	900720	936750
P63151;E5RFR9;E5RIY1;Q66LE6;Q00005;Q9Y2T4	P63151	Serine/threonine-protein phosphatase 2A 55 kDa regulatory subunit B alpha isoform	PPP2R2A	sp|P63151|2ABA_HUMAN Serine/threonine-protein phosphatase 2A 55 kDa regulatory subunit B alpha isoform OS=Homo sapiens GN=PPP2R2A PE=1 SV=1	51691	0	41098	577070	1432500	1165500
Q5VTU3;P63172	Q5VTU3;P63172	Dynein light chain Tctex-type 1	DYNLT1	tr|Q5VTU3|Q5VTU3_HUMAN Dynein light chain Tctex-type 1 OS=Homo sapiens GN=DYNLT1 PE=1 SV=1;sp|P63172|DYLT1_HUMAN Dynein light chain Tctex-type 1 OS=Homo sapiens GN=DYNLT1 PE=1 SV=1	10.2	0	11678	0	0	39253
P63244;H0YAF8;D6RAC2;J3KPE3;H0Y8W2;D6REE5;D6RFX4;D6RHH4;D6R9Z1;H0YAM7;D6R9L0;D6RF23;D6RAU2;E9PD14;D6RFZ9;H0Y9P0;D6RGK8;D6R909;H0Y8R5;D6RBD0;D6RHJ5	P63244;H0YAF8;D6RAC2;J3KPE3;H0Y8W2;D6REE5;D6RFX4;D6RHH4;D6R9Z1;H0YAM7;D6R9L0	Guanine nucleotide-binding protein subunit beta-2-like 1;Guanine nucleotide-binding protein subunit beta-2-like 1, N-terminally processed	GNB2L1	sp|P63244|RACK1_HUMAN Receptor of activated protein C kinase 1 OS=Homo sapiens GN=RACK1 PE=1 SV=3;tr|H0YAF8|H0YAF8_HUMAN Receptor of-activated protein C kinase 1 (Fragment) OS=Homo sapiens GN=RACK1 PE=1 SV=1;tr|D6RAC2|D6RAC2_HUMAN Receptor of-activated pro	35076	0	119.57	1996900	3095400	4438500
P63316;C9JDI3	P63316;C9JDI3	Troponin C, slow skeletal and cardiac muscles	TNNC1	sp|P63316|TNNC1_HUMAN Troponin C, slow skeletal and cardiac muscles OS=Homo sapiens GN=TNNC1 PE=1 SV=1;tr|C9JDI3|C9JDI3_HUMAN Troponin C, slow skeletal and cardiac muscles (Fragment) OS=Homo sapiens GN=TNNC1 PE=1 SV=1	18402	0	74888	1608300	504570	980420
Q5SRQ6;P67870;Q5SRQ3;N0E472;A0A0G2JM12	Q5SRQ6;P67870;Q5SRQ3;N0E472;A0A0G2JM12	Casein kinase II subunit beta	CSNK2B;CSNK2B-LY6G5B-1181;CSNK2B-LY6G5B--991	tr|Q5SRQ6|Q5SRQ6_HUMAN Casein kinase II subunit beta OS=Homo sapiens GN=CSNK2B PE=1 SV=2;sp|P67870|CSK2B_HUMAN Casein kinase II subunit beta OS=Homo sapiens GN=CSNK2B PE=1 SV=1;tr|Q5SRQ3|Q5SRQ3_HUMAN Casein kinase II subunit beta OS=Homo sapiens GN=CSNK2B	26925	0	3326	218340	111390	120370
P68032	P68032	Actin, alpha cardiac muscle 1	ACTC1	sp|P68032|ACTC_HUMAN Actin, alpha cardiac muscle 1 OS=Homo sapiens GN=ACTC1 PE=1 SV=1	42019	0	279.98	300970000	159100000	191270000
Q5VTE0;P68104;A0A087WVQ9;A0A087WV01;A6PW80;Q5JR01	Q5VTE0;P68104;A0A087WVQ9;A0A087WV01	Putative elongation factor 1-alpha-like 3;Elongation factor 1-alpha 1;Elongation factor 1-alpha	EEF1A1P5;EEF1A1	sp|Q5VTE0|EF1A3_HUMAN Putative elongation factor 1-alpha-like 3 OS=Homo sapiens GN=EEF1A1P5 PE=5 SV=1;sp|P68104|EF1A1_HUMAN Elongation factor 1-alpha 1 OS=Homo sapiens GN=EEF1A1 PE=1 SV=1;tr|A0A087WVQ9|A0A087WVQ9_HUMAN Elongation factor 1-alpha 1 OS=Homo s	50184	0	92175	0	683660	1046100
P68133;A6NL76	P68133;A6NL76	Actin, alpha skeletal muscle	ACTA1	sp|P68133|ACTS_HUMAN Actin, alpha skeletal muscle OS=Homo sapiens GN=ACTA1 PE=1 SV=1;tr|A6NL76|A6NL76_HUMAN Actin, alpha skeletal muscle OS=Homo sapiens GN=ACTA1 PE=1 SV=3	42051	0	70039	4832700	4411000	2855000
P68366;C9JEV8;C9JQ00;C9JJQ8;C9JDL2	P68366	Tubulin alpha-4A chain	TUBA4A	sp|P68366|TBA4A_HUMAN Tubulin alpha-4A chain OS=Homo sapiens GN=TUBA4A PE=1 SV=1	49924	0	22896	490810	698420	1038300
P68371;Q3ZCM7;M0QY85;M0QZL7;M0R0X0;M0QY37;M0QX14;A0A075B724	P68371	Tubulin beta-4B chain	TUBB4B	sp|P68371|TBB4B_HUMAN Tubulin beta-4B chain OS=Homo sapiens GN=TUBB4B PE=1 SV=1	49.83	0	42946	2815500	2627700	2271400
P68402;J3KNE3	P68402;J3KNE3	Platelet-activating factor acetylhydrolase IB subunit beta	PAFAH1B2	sp|P68402|PA1B2_HUMAN Platelet-activating factor acetylhydrolase IB subunit beta OS=Homo sapiens GN=PAFAH1B2 PE=1 SV=1;tr|J3KNE3|J3KNE3_HUMAN Platelet-activating factor acetylhydrolase IB subunit beta (Fragment) OS=Homo sapiens GN=PAFAH1B2 PE=1 SV=1	25569	0	56124	0	89613	117110
P68871;F8W6P5;A0A0J9YWK4	P68871;F8W6P5	Hemoglobin subunit beta;LVV-hemorphin-7;Spinorphin	HBB	sp|P68871|HBB_HUMAN Hemoglobin subunit beta OS=Homo sapiens GN=HBB PE=1 SV=2;tr|F8W6P5|F8W6P5_HUMAN Hemoglobin subunit beta (Fragment) OS=Homo sapiens GN=HBB PE=1 SV=1	15998	0	183.49	21300000	45085000	41155000
P69905;G3V1N2	P69905;G3V1N2	Hemoglobin subunit alpha	HBA1;HBA2	sp|P69905|HBA_HUMAN Hemoglobin subunit alpha OS=Homo sapiens GN=HBA1 PE=1 SV=2;tr|G3V1N2|G3V1N2_HUMAN HCG1745306, isoform CRA_a OS=Homo sapiens GN=HBA2 PE=1 SV=1	15257	0	59267	12687000	18167000	19753000
P78371;F5GWF6;F8VQ14	P78371;F5GWF6;F8VQ14	T-complex protein 1 subunit beta	CCT2	sp|P78371|TCPB_HUMAN T-complex protein 1 subunit beta OS=Homo sapiens GN=CCT2 PE=1 SV=4;tr|F5GWF6|F5GWF6_HUMAN T-complex protein 1 subunit beta OS=Homo sapiens GN=CCT2 PE=1 SV=2;tr|F8VQ14|F8VQ14_HUMAN T-complex protein 1 subunit beta OS=Homo sapiens GN=CCT	57488	0	138.23	1312000	1821900	1293800
P78417;Q5TA02;Q5TA01	P78417;Q5TA02	Glutathione S-transferase omega-1	GSTO1	sp|P78417|GSTO1_HUMAN Glutathione S-transferase omega-1 OS=Homo sapiens GN=GSTO1 PE=1 SV=2;tr|Q5TA02|Q5TA02_HUMAN Glutathione S-transferase omega-1 (Fragment) OS=Homo sapiens GN=GSTO1 PE=1 SV=1	27566	0	30472	1026300	3637400	2549800
P78527	P78527	DNA-dependent protein kinase catalytic subunit	PRKDC	sp|P78527|PRKDC_HUMAN DNA-dependent protein kinase catalytic subunit OS=Homo sapiens GN=PRKDC PE=1 SV=3	469.08	0	50234	0	47771	59458
P78560;F8VV49;F5H7C2;F8VVY5	P78560;F8VV49;F5H7C2;F8VVY5	Death domain-containing protein CRADD	CRADD	sp|P78560|CRADD_HUMAN Death domain-containing protein CRADD OS=Homo sapiens GN=CRADD PE=1 SV=1;tr|F8VV49|F8VV49_HUMAN Death domain-containing protein CRADD OS=Homo sapiens GN=CRADD PE=1 SV=1;tr|F5H7C2|F5H7C2_HUMAN Death domain-containing protein CRADD OS=H	22745	0.00087184	21676	0	21953	0
P81605	P81605	Dermcidin;Survival-promoting peptide;DCD-1	DCD	sp|P81605|DCD_HUMAN Dermcidin OS=Homo sapiens GN=DCD PE=1 SV=2	11284	0	99774	10078000	474040	911020
P98095	P98095	Fibulin-2	FBLN2	sp|P98095|FBLN2_HUMAN Fibulin-2 OS=Homo sapiens GN=FBLN2 PE=1 SV=2	126.57	0	14.66	0	253110	236850
P98160;A0A0U1RQT3	P98160	Basement membrane-specific heparan sulfate proteoglycan core protein;Endorepellin;LG3 peptide	HSPG2	sp|P98160|PGBM_HUMAN Basement membrane-specific heparan sulfate proteoglycan core protein OS=Homo sapiens GN=HSPG2 PE=1 SV=4	468.83	0	13618	380050	190340	251620
Q00577	Q00577	Transcriptional activator protein Pur-alpha	PURA	sp|Q00577|PURA_HUMAN Transcriptional activator protein Pur-alpha OS=Homo sapiens GN=PURA PE=1 SV=2	34.91	0	82291	0	140230	161190
Q00796;H0YLA4;H0YKB3	Q00796;H0YLA4;H0YKB3	Sorbitol dehydrogenase	SORD	sp|Q00796|DHSO_HUMAN Sorbitol dehydrogenase OS=Homo sapiens GN=SORD PE=1 SV=4;tr|H0YLA4|H0YLA4_HUMAN Sorbitol dehydrogenase OS=Homo sapiens GN=SORD PE=1 SV=1;tr|H0YKB3|H0YKB3_HUMAN Sorbitol dehydrogenase OS=Homo sapiens GN=SORD PE=1 SV=1	38324	0	27171	0	442240	897690
Q00839	Q00839	Heterogeneous nuclear ribonucleoprotein U	HNRNPU	sp|Q00839|HNRPU_HUMAN Heterogeneous nuclear ribonucleoprotein U OS=Homo sapiens GN=HNRNPU PE=1 SV=6	90583	0	46202	293740	90979	153500
Q01469	Q01469	Fatty acid-binding protein, epidermal	FABP5	sp|Q01469|FABP5_HUMAN Fatty acid-binding protein, epidermal OS=Homo sapiens GN=FABP5 PE=1 SV=3	15164	0.0064464	15216	0	0	104800
Q01518;Q5T0R7;Q5T0R6;Q5T0R5;Q5T0R4;Q5T0R3;Q5T0R2;Q5T0R1;Q5T0R9	Q01518;Q5T0R7;Q5T0R6;Q5T0R5;Q5T0R4;Q5T0R3;Q5T0R2;Q5T0R1	Adenylyl cyclase-associated protein 1;Adenylyl cyclase-associated protein	CAP1	sp|Q01518|CAP1_HUMAN Adenylyl cyclase-associated protein 1 OS=Homo sapiens GN=CAP1 PE=1 SV=5;tr|Q5T0R7|Q5T0R7_HUMAN Adenylyl cyclase-associated protein (Fragment) OS=Homo sapiens GN=CAP1 PE=1 SV=1;tr|Q5T0R6|Q5T0R6_HUMAN Adenylyl cyclase-associated protein	51901	0	33878	626210	653550	618830
Q01813;B1APP6;B1APP8;Q5VSR5;H0Y757;V9GY25;V9GYV7;H0Y3Y3	Q01813	ATP-dependent 6-phosphofructokinase, platelet type	PFKP	sp|Q01813|PFKAP_HUMAN ATP-dependent 6-phosphofructokinase, platelet type OS=Homo sapiens GN=PFKP PE=1 SV=2	85595	0	291.99	5543600	8787500	18649000
Q02252	Q02252	Methylmalonate-semialdehyde dehydrogenase [acylating], mitochondrial	ALDH6A1	sp|Q02252|MMSA_HUMAN Methylmalonate-semialdehyde dehydrogenase [acylating], mitochondrial OS=Homo sapiens GN=ALDH6A1 PE=1 SV=2	57839	0	30346	0	242770	0
Q02413	Q02413	Desmoglein-1	DSG1	sp|Q02413|DSG1_HUMAN Desmoglein-1 OS=Homo sapiens GN=DSG1 PE=1 SV=2	113.75	0	12533	1695300	132450	298760
Q02750;H3BRW9	Q02750	Dual specificity mitogen-activated protein kinase kinase 1	MAP2K1	sp|Q02750|MP2K1_HUMAN Dual specificity mitogen-activated protein kinase kinase 1 OS=Homo sapiens GN=MAP2K1 PE=1 SV=2	43439	0	14694	0	104350	166940
Q02878;F8VZ45;U3KQR5;F8VR69;F8VZA3;F8VWR1;F8VU16	Q02878;F8VZ45;U3KQR5	60S ribosomal protein L6	RPL6	sp|Q02878|RL6_HUMAN 60S ribosomal protein L6 OS=Homo sapiens GN=RPL6 PE=1 SV=3;tr|F8VZ45|F8VZ45_HUMAN 60S ribosomal protein L6 (Fragment) OS=Homo sapiens GN=RPL6 PE=1 SV=1;tr|U3KQR5|U3KQR5_HUMAN 60S ribosomal protein L6 (Fragment) OS=Homo sapiens GN=RPL6 P	32728	0	13891	0	376640	385900
Q03135;C9JKI3;E9PCT5;P56539	Q03135;C9JKI3;E9PCT5	Caveolin-1;Caveolin	CAV1	sp|Q03135|CAV1_HUMAN Caveolin-1 OS=Homo sapiens GN=CAV1 PE=1 SV=4;tr|C9JKI3|C9JKI3_HUMAN Caveolin (Fragment) OS=Homo sapiens GN=CAV1 PE=1 SV=1;tr|E9PCT5|E9PCT5_HUMAN Caveolin OS=Homo sapiens GN=CAV1 PE=1 SV=1	20471	0	10922	3836000	822860	1215000
Q04446;E9PGM4	Q04446;E9PGM4	1,4-alpha-glucan-branching enzyme	GBE1	sp|Q04446|GLGB_HUMAN 1,4-alpha-glucan-branching enzyme OS=Homo sapiens GN=GBE1 PE=1 SV=3;tr|E9PGM4|E9PGM4_HUMAN 1,4-alpha-glucan-branching enzyme OS=Homo sapiens GN=GBE1 PE=1 SV=1	80473	0	35604	3120900	3426900	2544500
Q04760	Q04760	Lactoylglutathione lyase	GLO1	sp|Q04760|LGUL_HUMAN Lactoylglutathione lyase OS=Homo sapiens GN=GLO1 PE=1 SV=4	20777	0	64872	0	65101	272420
Q04917;A2IDB2;F8WEB6;A2IDB1	Q04917;A2IDB2	14-3-3 protein eta	YWHAH	sp|Q04917|1433F_HUMAN 14-3-3 protein eta OS=Homo sapiens GN=YWHAH PE=1 SV=4;tr|A2IDB2|A2IDB2_HUMAN 14-3-3 protein eta (Fragment) OS=Homo sapiens GN=YWHAH PE=1 SV=1	28218	0	57629	608510	681750	795930
Q04941	Q04941	Proteolipid protein 2	PLP2	sp|Q04941|PLP2_HUMAN Proteolipid protein 2 OS=Homo sapiens GN=PLP2 PE=1 SV=1	16691	0	55148	0	0	103100
Q05086;A0A0D9SG63;A0A0D9SF91;S4R306;A0A0D9SGI3;A0A0D9SG77	Q05086;A0A0D9SG63;A0A0D9SF91;S4R306;A0A0D9SGI3;A0A0D9SG77	Ubiquitin-protein ligase E3A	UBE3A	sp|Q05086|UBE3A_HUMAN Ubiquitin-protein ligase E3A OS=Homo sapiens GN=UBE3A PE=1 SV=4;tr|A0A0D9SG63|A0A0D9SG63_HUMAN Ubiquitin-protein ligase E3A (Fragment) OS=Homo sapiens GN=UBE3A PE=1 SV=1;tr|A0A0D9SF91|A0A0D9SF91_HUMAN Ubiquitin-protein ligase E3A (Fra	100.69	0	33064	0	42236	81365
Q05639	Q05639	Elongation factor 1-alpha 2	EEF1A2	sp|Q05639|EF1A2_HUMAN Elongation factor 1-alpha 2 OS=Homo sapiens GN=EEF1A2 PE=1 SV=1	50.47	0	87192	16226000	18298000	29444000
Q07002	Q07002	Cyclin-dependent kinase 18	CDK18	sp|Q07002|CDK18_HUMAN Cyclin-dependent kinase 18 OS=Homo sapiens GN=CDK18 PE=1 SV=3	54179	0	43995	0	289280	378840
Q07075	Q07075	Glutamyl aminopeptidase	ENPEP	sp|Q07075|AMPE_HUMAN Glutamyl aminopeptidase OS=Homo sapiens GN=ENPEP PE=1 SV=3	109.24	0.00088261	22588	0	0	13330
Q07960;H0YE29;E9PNR6	Q07960;H0YE29	Rho GTPase-activating protein 1	ARHGAP1	sp|Q07960|RHG01_HUMAN Rho GTPase-activating protein 1 OS=Homo sapiens GN=ARHGAP1 PE=1 SV=1;tr|H0YE29|H0YE29_HUMAN Rho GTPase-activating protein 1 (Fragment) OS=Homo sapiens GN=ARHGAP1 PE=1 SV=1	50435	0	57031	177160	721270	1303200
Q08211	Q08211	ATP-dependent RNA helicase A	DHX9	sp|Q08211|DHX9_HUMAN ATP-dependent RNA helicase A OS=Homo sapiens GN=DHX9 PE=1 SV=4	140.96	0	6854	0	58189	48430
Q08257;A6NP24;C9JH92	Q08257;A6NP24	Quinone oxidoreductase	CRYZ	sp|Q08257|QOR_HUMAN Quinone oxidoreductase OS=Homo sapiens GN=CRYZ PE=1 SV=1;tr|A6NP24|A6NP24_HUMAN Quinone oxidoreductase (Fragment) OS=Homo sapiens GN=CRYZ PE=1 SV=1	35206	0	34455	1335200	1331700	1168800
Q08380	Q08380	Galectin-3-binding protein	LGALS3BP	sp|Q08380|LG3BP_HUMAN Galectin-3-binding protein OS=Homo sapiens GN=LGALS3BP PE=1 SV=1	65.33	0	38155	0	105870	130680
Q08554	Q08554	Desmocollin-1	DSC1	sp|Q08554|DSC1_HUMAN Desmocollin-1 OS=Homo sapiens GN=DSC1 PE=1 SV=2	99986	0.0025063	18054	1090200	0	0
Q08722	Q08722	Leukocyte surface antigen CD47	CD47	sp|Q08722|CD47_HUMAN Leukocyte surface antigen CD47 OS=Homo sapiens GN=CD47 PE=1 SV=1	35213	0	45391	1162700	151520	181270
Q09161	Q09161	Nuclear cap-binding protein subunit 1	NCBP1	sp|Q09161|NCBP1_HUMAN Nuclear cap-binding protein subunit 1 OS=Homo sapiens GN=NCBP1 PE=1 SV=1	91838	0	34418	0	19900	19304
Q09666;E9PQE3;E9PJZ0;E9PKR9;E9PJC6;E9PLK4	Q09666	Neuroblast differentiation-associated protein AHNAK	AHNAK	sp|Q09666|AHNK_HUMAN Neuroblast differentiation-associated protein AHNAK OS=Homo sapiens GN=AHNAK PE=1 SV=2	629.09	0	31834	8260500	1212000	1180500
Q10567;C9J1E7	Q10567;C9J1E7	AP-1 complex subunit beta-1	AP1B1	sp|Q10567|AP1B1_HUMAN AP-1 complex subunit beta-1 OS=Homo sapiens GN=AP1B1 PE=1 SV=2;tr|C9J1E7|C9J1E7_HUMAN AP-1 complex subunit beta-1 (Fragment) OS=Homo sapiens GN=AP1B1 PE=1 SV=1	104.64	0	37023	0	210890	201670
Q5SXN9;Q10713	Q5SXN9;Q10713	Mitochondrial-processing peptidase subunit alpha	PMPCA	tr|Q5SXN9|Q5SXN9_HUMAN Mitochondrial-processing peptidase subunit alpha (Fragment) OS=Homo sapiens GN=PMPCA PE=1 SV=1;sp|Q10713|MPPA_HUMAN Mitochondrial-processing peptidase subunit alpha OS=Homo sapiens GN=PMPCA PE=1 SV=2	29532	0.00089286	23462	0	0	61537
Q12768;E7EQI7	Q12768;E7EQI7	WASH complex subunit strumpellin	KIAA0196	sp|Q12768|STRUM_HUMAN WASH complex subunit strumpellin OS=Homo sapiens GN=KIAA0196 PE=1 SV=1;tr|E7EQI7|E7EQI7_HUMAN WASH complex subunit strumpellin OS=Homo sapiens GN=KIAA0196 PE=1 SV=1	134.28	0	73592	0	66598	69191
Q12906;K7EQR9;K7EKJ9	Q12906	Interleukin enhancer-binding factor 3	ILF3	sp|Q12906|ILF3_HUMAN Interleukin enhancer-binding factor 3 OS=Homo sapiens GN=ILF3 PE=1 SV=3	95337	0	32407	317840	294030	563880
Q12988	Q12988	Heat shock protein beta-3	HSPB3	sp|Q12988|HSPB3_HUMAN Heat shock protein beta-3 OS=Homo sapiens GN=HSPB3 PE=1 SV=2	16965	0.00089928	24243	0	0	52947
Q13011;M0QZW4;M0R248;M0QYT0	Q13011;M0QZW4;M0R248	Delta(3,5)-Delta(2,4)-dienoyl-CoA isomerase, mitochondrial	ECH1	sp|Q13011|ECH1_HUMAN Delta(3,5)-Delta(2,4)-dienoyl-CoA isomerase, mitochondrial OS=Homo sapiens GN=ECH1 PE=1 SV=2;tr|M0QZW4|M0QZW4_HUMAN Delta(3,5)-Delta(2,4)-dienoyl-CoA isomerase, mitochondrial (Fragment) OS=Homo sapiens GN=ECH1 PE=1 SV=1;tr|M0R248|M0R24	35816	0	23415	485080	247920	177500
Q13033	Q13033	Striatin-3	STRN3	sp|Q13033|STRN3_HUMAN Striatin-3 OS=Homo sapiens GN=STRN3 PE=1 SV=3	87208	0	13589	116230	0	287820
Q13057;K7EP09;K7ESK6;K7ES73;K7EN91;K7EPT0	Q13057;K7EP09;K7ESK6;K7ES73;K7EN91	Bifunctional coenzyme A synthase;Phosphopantetheine adenylyltransferase;Dephospho-CoA kinase	COASY	sp|Q13057|COASY_HUMAN Bifunctional coenzyme A synthase OS=Homo sapiens GN=COASY PE=1 SV=4;tr|K7EP09|K7EP09_HUMAN Bifunctional coenzyme A synthase (Fragment) OS=Homo sapiens GN=COASY PE=1 SV=7;tr|K7ESK6|K7ESK6_HUMAN Bifunctional coenzyme A synthase (Fragmen	62328	0	24124	0	325010	586030
Q13200;H7C1H2;H7C2Q3;C9JPC0	Q13200	26S proteasome non-ATPase regulatory subunit 2	PSMD2	sp|Q13200|PSMD2_HUMAN 26S proteasome non-ATPase regulatory subunit 2 OS=Homo sapiens GN=PSMD2 PE=1 SV=3	100.2	0	28041	463670	1049400	1294200
Q13228;A6PVX1;H0Y532;F2Z2W8;F8WCR4;C9JVL0	Q13228;A6PVX1	Selenium-binding protein 1	SELENBP1	sp|Q13228|SBP1_HUMAN Selenium-binding protein 1 OS=Homo sapiens GN=SELENBP1 PE=1 SV=2;tr|A6PVX1|A6PVX1_HUMAN Selenium-binding protein 1 (Fragment) OS=Homo sapiens GN=SELENBP1 PE=1 SV=1	52.39	0	47295	2050800	1873900	1385800
Q13325	Q13325	Interferon-induced protein with tetratricopeptide repeats 5	IFIT5	sp|Q13325|IFIT5_HUMAN Interferon-induced protein with tetratricopeptide repeats 5 OS=Homo sapiens GN=IFIT5 PE=1 SV=1	55846	0	35844	0	0	12358
Q13347;Q5TFK1	Q13347;Q5TFK1	Eukaryotic translation initiation factor 3 subunit I	EIF3I	sp|Q13347|EIF3I_HUMAN Eukaryotic translation initiation factor 3 subunit I OS=Homo sapiens GN=EIF3I PE=1 SV=1;tr|Q5TFK1|Q5TFK1_HUMAN Eukaryotic translation initiation factor 3 subunit I (Fragment) OS=Homo sapiens GN=EIF3I PE=1 SV=1	36501	0	77666	124080	273650	254800
Q13409;E7EQL5;E7EV09;E7ET01;E7ETL8;E7EQU2;E7ESD3;E7EMU4	Q13409;E7EQL5	Cytoplasmic dynein 1 intermediate chain 2	DYNC1I2	sp|Q13409|DC1I2_HUMAN Cytoplasmic dynein 1 intermediate chain 2 OS=Homo sapiens GN=DYNC1I2 PE=1 SV=3;tr|E7EQL5|E7EQL5_HUMAN Cytoplasmic dynein 1 intermediate chain 2 (Fragment) OS=Homo sapiens GN=DYNC1I2 PE=1 SV=1	71456	0	82835	0	177410	102420
Q13424;A0A0G2JM75;J3KT21;H0YCS0;Q13884	Q13424	Alpha-1-syntrophin	SNTA1	sp|Q13424|SNTA1_HUMAN Alpha-1-syntrophin OS=Homo sapiens GN=SNTA1 PE=1 SV=1	53895	0	46211	234390	2051400	2102400
Q13425;A0A140TA73	Q13425;A0A140TA73	Beta-2-syntrophin	SNTB2	sp|Q13425|SNTB2_HUMAN Beta-2-syntrophin OS=Homo sapiens GN=SNTB2 PE=1 SV=1;tr|A0A140TA73|A0A140TA73_HUMAN Beta-2-syntrophin (Fragment) OS=Homo sapiens GN=SNTB2 PE=1 SV=1	57949	0	26678	0	57320	81420
Q13554;H7C394;Q8WU40;Q5SWX3;A0A0A0MS52;A0A0A0MT11;Q13555;H0Y6G2	Q13554;H7C394;Q8WU40;Q5SWX3;A0A0A0MS52;A0A0A0MT11;Q13555	Calcium/calmodulin-dependent protein kinase type II subunit beta;Calcium/calmodulin-dependent protein kinase type II subunit gamma	CAMK2B;CAMK2G	sp|Q13554|KCC2B_HUMAN Calcium/calmodulin-dependent protein kinase type II subunit beta OS=Homo sapiens GN=CAMK2B PE=1 SV=3;tr|H7C394|H7C394_HUMAN Calcium/calmodulin-dependent protein kinase type II subunit beta (Fragment) OS=Homo sapiens GN=CAMK2B PE=1 SV=	72677	0.00089445	23666	0	38694	76975
Q13564;H3BMR3;J3QLH4;J3QRA5;J3KRK3	Q13564;H3BMR3;J3QLH4;J3QRA5;J3KRK3	NEDD8-activating enzyme E1 regulatory subunit	NAE1	sp|Q13564|ULA1_HUMAN NEDD8-activating enzyme E1 regulatory subunit OS=Homo sapiens GN=NAE1 PE=1 SV=1;tr|H3BMR3|H3BMR3_HUMAN NEDD8-activating enzyme E1 regulatory subunit (Fragment) OS=Homo sapiens GN=NAE1 PE=1 SV=2;tr|J3QLH4|J3QLH4_HUMAN NEDD8-activating e	60246	0	41704	0	96759	214930
Q13838;A0A0G2JJZ9;Q5STU3;O00148;F6WLT2;A0A140T9X3;A0A140T996;F6S4E6;A0A0A0MT12;F6TRA5;A0A140T9L4;A0A140T973;A0A140T9K1;A0A140T9X9;F6UJC5;A0A140TA18;K7EQN7;F6QYI9;A0A0G2JJL7;H0Y400;K7EPJ3;F6R6M7;A0A140T9K2;A0A140T9N3;K7EN69;K7ENP6;A0A0D9SEM9;A0A0G2JHN7;K7EL56;K7EIL8;F6U6E2;F6S2B7;F6SXL5;H0YCC6	Q13838;A0A0G2JJZ9;Q5STU3;O00148;F6WLT2;A0A140T9X3;A0A140T996;F6S4E6;A0A0A0MT12;F6TRA5;A0A140T9L4;A0A140T973;A0A140T9K1;A0A140T9X9;F6UJC5;A0A140TA18;K7EQN7	Spliceosome RNA helicase DDX39B;ATP-dependent RNA helicase DDX39A	DDX39B;DDX39A	sp|Q13838|DX39B_HUMAN Spliceosome RNA helicase DDX39B OS=Homo sapiens GN=DDX39B PE=1 SV=1;tr|A0A0G2JJZ9|A0A0G2JJZ9_HUMAN Spliceosome RNA helicase DDX39B (Fragment) OS=Homo sapiens GN=DDX39B PE=1 SV=1;tr|Q5STU3|Q5STU3_HUMAN Spliceosome RNA helicase DDX39B O	48991	0	30236	351080	1416100	2522500
Q13885;Q9BVA1	Q13885;Q9BVA1	Tubulin beta-2A chain;Tubulin beta-2B chain	TUBB2A;TUBB2B	sp|Q13885|TBB2A_HUMAN Tubulin beta-2A chain OS=Homo sapiens GN=TUBB2A PE=1 SV=1;sp|Q9BVA1|TBB2B_HUMAN Tubulin beta-2B chain OS=Homo sapiens GN=TUBB2B PE=1 SV=1	49906	0	14071	403830	262300	304930
Q13976;A0A0A0MSB3;B1ALS0;B7ZA25;Q13237	Q13976;A0A0A0MSB3	cGMP-dependent protein kinase 1	PRKG1	sp|Q13976|KGP1_HUMAN cGMP-dependent protein kinase 1 OS=Homo sapiens GN=PRKG1 PE=1 SV=3;tr|A0A0A0MSB3|A0A0A0MSB3_HUMAN cGMP-dependent protein kinase 1 OS=Homo sapiens GN=PRKG1 PE=1 SV=1	76364	0	34411	260500	512960	1556000
Q14139;B7Z7P0	Q14139;B7Z7P0	Ubiquitin conjugation factor E4 A	UBE4A	sp|Q14139|UBE4A_HUMAN Ubiquitin conjugation factor E4 A OS=Homo sapiens GN=UBE4A PE=1 SV=2;tr|B7Z7P0|B7Z7P0_HUMAN Ubiquitin conjugation factor E4 A OS=Homo sapiens GN=UBE4A PE=1 SV=1	122.56	0	59.6	138720	219620	451110
Q14152	Q14152	Eukaryotic translation initiation factor 3 subunit A	EIF3A	sp|Q14152|EIF3A_HUMAN Eukaryotic translation initiation factor 3 subunit A OS=Homo sapiens GN=EIF3A PE=1 SV=1	166.57	0	120.62	947980	1439700	2474600
Q14166	Q14166	Tubulin--tyrosine ligase-like protein 12	TTLL12	sp|Q14166|TTL12_HUMAN Tubulin--tyrosine ligase-like protein 12 OS=Homo sapiens GN=TTLL12 PE=1 SV=2	74403	0	6.91	0	69284	53141
Q14195;H0YBT4;Q14117	Q14195;H0YBT4	Dihydropyrimidinase-related protein 3	DPYSL3	sp|Q14195|DPYL3_HUMAN Dihydropyrimidinase-related protein 3 OS=Homo sapiens GN=DPYSL3 PE=1 SV=1;tr|H0YBT4|H0YBT4_HUMAN Dihydropyrimidinase-related protein 3 (Fragment) OS=Homo sapiens GN=DPYSL3 PE=1 SV=1	61963	0	10697	719880	564700	468700
Q14204;H0YJ21	Q14204	Cytoplasmic dynein 1 heavy chain 1	DYNC1H1	sp|Q14204|DYHC1_HUMAN Cytoplasmic dynein 1 heavy chain 1 OS=Homo sapiens GN=DYNC1H1 PE=1 SV=5	532.4	0	323.31	4259000	14711000	18119000
Q14240;E7EQG2;J3KSN7;J3KT04;J3KS93;E7EMV8	Q14240;E7EQG2	Eukaryotic initiation factor 4A-II;Eukaryotic initiation factor 4A-II, N-terminally processed	EIF4A2	sp|Q14240|IF4A2_HUMAN Eukaryotic initiation factor 4A-II OS=Homo sapiens GN=EIF4A2 PE=1 SV=2;tr|E7EQG2|E7EQG2_HUMAN Eukaryotic initiation factor 4A-II OS=Homo sapiens GN=EIF4A2 PE=1 SV=1	46402	0	293.92	7428700	15563000	16589000
Q14315;E7EN95;H0Y5C6	Q14315	Filamin-C	FLNC	sp|Q14315|FLNC_HUMAN Filamin-C OS=Homo sapiens GN=FLNC PE=1 SV=3	291.02	0	323.31	19253000	66449000	19511000
Q14344	Q14344	Guanine nucleotide-binding protein subunit alpha-13	GNA13	sp|Q14344|GNA13_HUMAN Guanine nucleotide-binding protein subunit alpha-13 OS=Homo sapiens GN=GNA13 PE=1 SV=2	44049	0	63268	0	37327	63224
Q14432;Q13370	Q14432	cGMP-inhibited 3,5-cyclic phosphodiesterase A	PDE3A	sp|Q14432|PDE3A_HUMAN cGMP-inhibited 3,5-cyclic phosphodiesterase A OS=Homo sapiens GN=PDE3A PE=1 SV=3	124.98	0	27783	0	468710	559600
Q14697;F5H6X6;E9PKU7	Q14697;F5H6X6;E9PKU7	Neutral alpha-glucosidase AB	GANAB	sp|Q14697|GANAB_HUMAN Neutral alpha-glucosidase AB OS=Homo sapiens GN=GANAB PE=1 SV=3;tr|F5H6X6|F5H6X6_HUMAN Neutral alpha-glucosidase AB OS=Homo sapiens GN=GANAB PE=1 SV=1;tr|E9PKU7|E9PKU7_HUMAN Neutral alpha-glucosidase AB OS=Homo sapiens GN=GANAB PE=1 S	106.87	0	15.59	328080	792620	297320
Q14764;H3BQK6;H3BRL2;I3L155;H3BUK7;H3BNF6	Q14764	Major vault protein	MVP	sp|Q14764|MVP_HUMAN Major vault protein OS=Homo sapiens GN=MVP PE=1 SV=4	99326	0	79608	1046300	1298100	674100
Q14894;I3L325;I3NI53;I3L2W5;I3L3Y1	Q14894;I3L325;I3NI53;I3L2W5	Ketimine reductase mu-crystallin	CRYM	sp|Q14894|CRYM_HUMAN Ketimine reductase mu-crystallin OS=Homo sapiens GN=CRYM PE=1 SV=1;tr|I3L325|I3L325_HUMAN Ketimine reductase mu-crystallin (Fragment) OS=Homo sapiens GN=CRYM PE=1 SV=1;tr|I3NI53|I3NI53_HUMAN Ketimine reductase mu-crystallin (Fragment)	33775	0	130.61	3415000	8771500	7228000
Q14974;J3KTM9;J3QR48;J3QKQ5;J3QRG4	Q14974;J3KTM9	Importin subunit beta-1	KPNB1	sp|Q14974|IMB1_HUMAN Importin subunit beta-1 OS=Homo sapiens GN=KPNB1 PE=1 SV=2;tr|J3KTM9|J3KTM9_HUMAN Importin subunit beta-1 (Fragment) OS=Homo sapiens GN=KPNB1 PE=1 SV=1	97169	0	132.58	1345400	2258300	2718600
Q15008;C9J7B7;C9J0E9;H7C531	Q15008	26S proteasome non-ATPase regulatory subunit 6	PSMD6	sp|Q15008|PSMD6_HUMAN 26S proteasome non-ATPase regulatory subunit 6 OS=Homo sapiens GN=PSMD6 PE=1 SV=1	45531	0	29.35	138480	690620	581850
Q15029	Q15029	116 kDa U5 small nuclear ribonucleoprotein component	EFTUD2	sp|Q15029|U5S1_HUMAN 116 kDa U5 small nuclear ribonucleoprotein component OS=Homo sapiens GN=EFTUD2 PE=1 SV=1	109.43	0	4049	0	30538	35969
Q15046;J3KRL2;H3BPV7;H3BVA8	Q15046	Lysine--tRNA ligase	KARS	sp|Q15046|SYK_HUMAN Lysine--tRNA ligase OS=Homo sapiens GN=KARS PE=1 SV=3	68047	0	72344	597060	221140	242100
Q15058	Q15058	Kinesin-like protein KIF14	KIF14	sp|Q15058|KIF14_HUMAN Kinesin-like protein KIF14 OS=Homo sapiens GN=KIF14 PE=1 SV=1	186.49	0.0079302	14489	0	0	1497600
Q15084	Q15084	Protein disulfide-isomerase A6	PDIA6	sp|Q15084|PDIA6_HUMAN Protein disulfide-isomerase A6 OS=Homo sapiens GN=PDIA6 PE=1 SV=1	48121	0	14428	0	87543	44002
Q15118;F8WC75;C9JKT3;F8WEJ6;C9IYB4	Q15118;F8WC75;C9JKT3;F8WEJ6;C9IYB4	[Pyruvate dehydrogenase (acetyl-transferring)] kinase isozyme 1, mitochondrial	PDK1	sp|Q15118|PDK1_HUMAN [Pyruvate dehydrogenase (acetyl-transferring)] kinase isozyme 1, mitochondrial OS=Homo sapiens GN=PDK1 PE=1 SV=1;tr|F8WC75|F8WC75_HUMAN [Pyruvate dehydrogenase (acetyl-transferring)] kinase isozyme 1, mitochondrial OS=Homo sapiens GN=P	49244	0.0017094	20322	0	25076	0
Q15124;Q5JTY7	Q15124	Phosphoglucomutase-like protein 5	PGM5	sp|Q15124|PGM5_HUMAN Phosphoglucomutase-like protein 5 OS=Homo sapiens GN=PGM5 PE=1 SV=2	62224	0	92629	4926600	5310700	9705700
Q15126	Q15126	Phosphomevalonate kinase	PMVK	sp|Q15126|PMVK_HUMAN Phosphomevalonate kinase OS=Homo sapiens GN=PMVK PE=1 SV=3	21995	0.00087951	22425	0	0	74894
Q15149;E9PMV1;E9PKG0;E9PQ28;E9PIA2;H3BPE1;H3BQK9;Q9UPN3	Q15149	Plectin	PLEC	sp|Q15149|PLEC_HUMAN Plectin OS=Homo sapiens GN=PLEC PE=1 SV=3	531.78	0	214.63	4281100	6507300	5577700
Q15172	Q15172	Serine/threonine-protein phosphatase 2A 56 kDa regulatory subunit alpha isoform	PPP2R5A	sp|Q15172|2A5A_HUMAN Serine/threonine-protein phosphatase 2A 56 kDa regulatory subunit alpha isoform OS=Homo sapiens GN=PPP2R5A PE=1 SV=1	56193	0	46372	235850	602530	862940
Q15327	Q15327	Ankyrin repeat domain-containing protein 1	ANKRD1	sp|Q15327|ANKR1_HUMAN Ankyrin repeat domain-containing protein 1 OS=Homo sapiens GN=ANKRD1 PE=1 SV=2	36251	0	20213	519820	608650	1409900
Q15365;F8W0G4;F8VXH9;H3BRU6;F8VZX2;J3QT27;E9PFP8;Q15366;P57721	Q15365;F8W0G4;F8VXH9;H3BRU6;F8VZX2;J3QT27;E9PFP8;Q15366;P57721	Poly(rC)-binding protein 1;Poly(rC)-binding protein 2;Poly(rC)-binding protein 3	PCBP1;PCBP2;PCBP3	sp|Q15365|PCBP1_HUMAN Poly(rC)-binding protein 1 OS=Homo sapiens GN=PCBP1 PE=1 SV=2;tr|F8W0G4|F8W0G4_HUMAN Poly(rC)-binding protein 2 (Fragment) OS=Homo sapiens GN=PCBP2 PE=1 SV=1;tr|F8VXH9|F8VXH9_HUMAN Poly(rC)-binding protein 2 (Fragment) OS=Homo sapiens	37497	0	26908	0	170160	423050
Q15382;F8WBL3;C9J931	Q15382;F8WBL3;C9J931	GTP-binding protein Rheb	RHEB	sp|Q15382|RHEB_HUMAN GTP-binding protein Rheb OS=Homo sapiens GN=RHEB PE=1 SV=1;tr|F8WBL3|F8WBL3_HUMAN GTP-binding protein Rheb OS=Homo sapiens GN=RHEB PE=1 SV=1;tr|C9J931|C9J931_HUMAN GTP-binding protein Rheb OS=Homo sapiens GN=RHEB PE=1 SV=1	20497	0.0024773	16942	0	75144	139110
Q15404	Q15404	Ras suppressor protein 1	RSU1	sp|Q15404|RSU1_HUMAN Ras suppressor protein 1 OS=Homo sapiens GN=RSU1 PE=1 SV=3	31.54	0	79623	0	169960	206070
Q15746	Q15746	Myosin light chain kinase, smooth muscle;Myosin light chain kinase, smooth muscle, deglutamylated form	MYLK	sp|Q15746|MYLK_HUMAN Myosin light chain kinase, smooth muscle OS=Homo sapiens GN=MYLK PE=1 SV=4	210.71	0.0017167	20981	0	0	373190
Q15813	Q15813	Tubulin-specific chaperone E	TBCE	sp|Q15813|TBCE_HUMAN Tubulin-specific chaperone E OS=Homo sapiens GN=TBCE PE=1 SV=1	59345	0.00089526	23682	0	0	75221
Q15907;H3BMH2;H3BSC1;P62491;M0R2D0;B4DQU5	Q15907;H3BMH2;H3BSC1;P62491	Ras-related protein Rab-11B;Ras-related protein Rab-11A	RAB11B;RAB11A	sp|Q15907|RB11B_HUMAN Ras-related protein Rab-11B OS=Homo sapiens GN=RAB11B PE=1 SV=4;tr|H3BMH2|H3BMH2_HUMAN Ras-related protein Rab-11A (Fragment) OS=Homo sapiens GN=RAB11A PE=4 SV=1;tr|H3BSC1|H3BSC1_HUMAN Ras-related protein Rab-11A OS=Homo sapiens GN=RA	24488	0	26162	838070	505380	449650
Q16222	Q16222	UDP-N-acetylhexosamine pyrophosphorylase;UDP-N-acetylgalactosamine pyrophosphorylase;UDP-N-acetylglucosamine pyrophosphorylase	UAP1	sp|Q16222|UAP1_HUMAN UDP-N-acetylhexosamine pyrophosphorylase OS=Homo sapiens GN=UAP1 PE=1 SV=3	58768	0	41064	0	0	6743.5
Q16401	Q16401	26S proteasome non-ATPase regulatory subunit 5	PSMD5	sp|Q16401|PSMD5_HUMAN 26S proteasome non-ATPase regulatory subunit 5 OS=Homo sapiens GN=PSMD5 PE=1 SV=3	56195	0	45789	0	284560	350850
Q16531;F5GY55;F5GWI0;F5H2L3;F5GZY8;F5GYG8	Q16531;F5GY55	DNA damage-binding protein 1	DDB1	sp|Q16531|DDB1_HUMAN DNA damage-binding protein 1 OS=Homo sapiens GN=DDB1 PE=1 SV=1;tr|F5GY55|F5GY55_HUMAN DNA damage-binding protein 1 OS=Homo sapiens GN=DDB1 PE=1 SV=1	126.97	0	62077	1649200	2131300	2681600
Q16537	Q16537	Serine/threonine-protein phosphatase 2A 56 kDa regulatory subunit epsilon isoform	PPP2R5E	sp|Q16537|2A5E_HUMAN Serine/threonine-protein phosphatase 2A 56 kDa regulatory subunit epsilon isoform OS=Homo sapiens GN=PPP2R5E PE=1 SV=1	54699	0	33796	0	194360	199190
Q16555;E5RFU4;D6RF19	Q16555	Dihydropyrimidinase-related protein 2	DPYSL2	sp|Q16555|DPYL2_HUMAN Dihydropyrimidinase-related protein 2 OS=Homo sapiens GN=DPYSL2 PE=1 SV=1	62293	0	140.99	5766500	4662300	6407300
Q16585	Q16585	Beta-sarcoglycan	SGCB	sp|Q16585|SGCB_HUMAN Beta-sarcoglycan OS=Homo sapiens GN=SGCB PE=1 SV=1	34776	0	31141	0	0	93348
Q16647	Q16647	Prostacyclin synthase	PTGIS	sp|Q16647|PTGIS_HUMAN Prostacyclin synthase OS=Homo sapiens GN=PTGIS PE=1 SV=1	57103	0	4799	0	46655	31172
Q16658;C9JPH9;C9JFC0;A0A0A0MSB2	Q16658	Fascin	FSCN1	sp|Q16658|FSCN1_HUMAN Fascin OS=Homo sapiens GN=FSCN1 PE=1 SV=3	54529	0	28518	0	571840	1102700
Q16698;E5RFV2;E5RJG7;E5RID6;E5RJD2;H0YAW3	Q16698;E5RFV2	2,4-dienoyl-CoA reductase, mitochondrial	DECR1	sp|Q16698|DECR_HUMAN 2,4-dienoyl-CoA reductase, mitochondrial OS=Homo sapiens GN=DECR1 PE=1 SV=1;tr|E5RFV2|E5RFV2_HUMAN 2,4-dienoyl-CoA reductase, mitochondrial (Fragment) OS=Homo sapiens GN=DECR1 PE=1 SV=1	36067	0	51.46	1208200	4937900	2136600
Q16720;E7ERY9;P23634;P20020;H0Y7S3;Q01814	Q16720;E7ERY9;P23634;P20020	Plasma membrane calcium-transporting ATPase 3;Calcium-transporting ATPase;Plasma membrane calcium-transporting ATPase 4;Plasma membrane calcium-transporting ATPase 1	ATP2B3;ATP2B1;ATP2B4	sp|Q16720|AT2B3_HUMAN Plasma membrane calcium-transporting ATPase 3 OS=Homo sapiens GN=ATP2B3 PE=1 SV=3;tr|E7ERY9|E7ERY9_HUMAN Calcium-transporting ATPase OS=Homo sapiens GN=ATP2B1 PE=1 SV=2;sp|P23634|AT2B4_HUMAN Plasma membrane calcium-transporting ATPase	134.2	0.00089047	23308	1352000	221690	0
Q16853;O75106;K7EQZ5;K7EL47	Q16853	Membrane primary amine oxidase	AOC3	sp|Q16853|AOC3_HUMAN Membrane primary amine oxidase OS=Homo sapiens GN=AOC3 PE=1 SV=3	84621	0	22618	3386600	549620	770670
Q27J81	Q27J81	Inverted formin-2	INF2	sp|Q27J81|INF2_HUMAN Inverted formin-2 OS=Homo sapiens GN=INF2 PE=1 SV=2	135.62	0	45281	0	0	4311
Q32MK0	Q32MK0	Myosin light chain kinase 3	MYLK3	sp|Q32MK0|MYLK3_HUMAN Myosin light chain kinase 3 OS=Homo sapiens GN=MYLK3 PE=1 SV=3	88392	0	23259	293080	508710	241390
Q53TN4	Q53TN4	Cytochrome b reductase 1	CYBRD1	sp|Q53TN4|CYBR1_HUMAN Cytochrome b reductase 1 OS=Homo sapiens GN=CYBRD1 PE=1 SV=1	31641	0	13029	1492300	0	0
Q562R1	Q562R1	Beta-actin-like protein 2	ACTBL2	sp|Q562R1|ACTBL_HUMAN Beta-actin-like protein 2 OS=Homo sapiens GN=ACTBL2 PE=1 SV=2	42003	0.0017271	21231	0	0	1278200
Q58FF8	Q58FF8	Putative heat shock protein HSP 90-beta 2	HSP90AB2P	sp|Q58FF8|H90B2_HUMAN Putative heat shock protein HSP 90-beta 2 OS=Homo sapiens GN=HSP90AB2P PE=1 SV=2	44348	0	29474	0	100240	66750
Q5BKX8	Q5BKX8	Muscle-related coiled-coil protein	MURC	sp|Q5BKX8|MURC_HUMAN Muscle-related coiled-coil protein OS=Homo sapiens GN=MURC PE=1 SV=2	41899	0	14433	0	0	161620
Q5GLZ8	Q5GLZ8	Probable E3 ubiquitin-protein ligase HERC4	HERC4	sp|Q5GLZ8|HERC4_HUMAN Probable E3 ubiquitin-protein ligase HERC4 OS=Homo sapiens GN=HERC4 PE=1 SV=1	118.56	0	65961	0	51385	110570
Q5H907;Q5H909;Q9UNF1	Q5H907;Q5H909;Q9UNF1	Melanoma-associated antigen D2	MAGED2	tr|Q5H907|Q5H907_HUMAN Melanoma antigen family D, 2, isoform CRA_d OS=Homo sapiens GN=MAGED2 PE=1 SV=1;tr|Q5H909|Q5H909_HUMAN Melanoma-associated antigen D2 OS=Homo sapiens GN=MAGED2 PE=1 SV=2;sp|Q9UNF1|MAGD2_HUMAN Melanoma-associated antigen D2 OS=Homo sa	55795	0	32722	0	0	20565
Q5JVF3	Q5JVF3	PCI domain-containing protein 2	PCID2	sp|Q5JVF3|PCID2_HUMAN PCI domain-containing protein 2 OS=Homo sapiens GN=PCID2 PE=1 SV=2	46029	0	65655	0	28950	49875
Q5JXI8;A0A0D9SFI6;A0A0D9SFB0;Q5JXH9;A0A0D9SFZ9;Q5JXH8;Q5JXH7;Q5JXI3;Q5JXI2;Q13642;A0A0D9SG53;A0A0D9SGB2;Q5JXI0	Q5JXI8;A0A0D9SFI6;A0A0D9SFB0;Q5JXH9;A0A0D9SFZ9;Q5JXH8;Q5JXH7;Q5JXI3;Q5JXI2;Q13642	Four and a half LIM domains protein 1	FHL1	tr|Q5JXI8|Q5JXI8_HUMAN Four and a half LIM domains protein 1 (Fragment) OS=Homo sapiens GN=FHL1 PE=1 SV=1;tr|A0A0D9SFI6|A0A0D9SFI6_HUMAN Four and a half LIM domains protein 1 (Fragment) OS=Homo sapiens GN=FHL1 PE=1 SV=1;tr|A0A0D9SFB0|A0A0D9SFB0_HUMAN Four	29.16	0	25223	1666200	5448400	2001600
Q5LJB0;Q5LJA5;Q5LJA9;Q9Y5K5	Q5LJB0;Q5LJA5;Q5LJA9;Q9Y5K5	Ubiquitin carboxyl-terminal hydrolase;Ubiquitin carboxyl-terminal hydrolase isozyme L5	UCHL5	tr|Q5LJB0|Q5LJB0_HUMAN Ubiquitin carboxyl-terminal hydrolase (Fragment) OS=Homo sapiens GN=UCHL5 PE=1 SV=1;tr|Q5LJA5|Q5LJA5_HUMAN Ubiquitin carboxyl-terminal hydrolase OS=Homo sapiens GN=UCHL5 PE=1 SV=1;tr|Q5LJA9|Q5LJA9_HUMAN Ubiquitin carboxyl-terminal hy	29116	0.0017065	2012	0	0	64428
Q5QPD0;Q5TFE4	Q5QPD0;Q5TFE4	5-nucleotidase domain-containing protein 1	NT5DC1	tr|Q5QPD0|Q5QPD0_HUMAN 5-nucleotidase domain-containing protein 1 (Fragment) OS=Homo sapiens GN=NT5DC1 PE=1 SV=1;sp|Q5TFE4|NT5D1_HUMAN 5-nucleotidase domain-containing protein 1 OS=Homo sapiens GN=NT5DC1 PE=1 SV=1	22185	0	38673	0	11397	0
Q5R3I4;H7C089;H7C2L7;A9UJP8	Q5R3I4	Tetratricopeptide repeat protein 38	TTC38	sp|Q5R3I4|TTC38_HUMAN Tetratricopeptide repeat protein 38 OS=Homo sapiens GN=TTC38 PE=1 SV=1	52787	0	18193	0	295510	437650
Q5T0I0	Q5T0I0		GSN	tr|Q5T0I0|Q5T0I0_HUMAN Gelsolin (Fragment) OS=Homo sapiens GN=GSN PE=1 SV=1	28953	0.00088496	22761	0	0	59992
Q5T196;Q8NFF5	Q5T196;Q8NFF5	FAD synthase;Molybdenum cofactor biosynthesis protein-like region;FAD synthase region	FLAD1	tr|Q5T196|Q5T196_HUMAN FAD synthase OS=Homo sapiens GN=FLAD1 PE=1 SV=1;sp|Q8NFF5|FAD1_HUMAN FAD synthase OS=Homo sapiens GN=FLAD1 PE=1 SV=1	50141	0	28126	0	14511	24446
Q5T4S7;A0A0A0MSW0;X6R960	Q5T4S7;A0A0A0MSW0	E3 ubiquitin-protein ligase UBR4	UBR4	sp|Q5T4S7|UBR4_HUMAN E3 ubiquitin-protein ligase UBR4 OS=Homo sapiens GN=UBR4 PE=1 SV=1;tr|A0A0A0MSW0|A0A0A0MSW0_HUMAN E3 ubiquitin-protein ligase UBR4 (Fragment) OS=Homo sapiens GN=UBR4 PE=1 SV=1	573.83	0	71831	0	28843	21117
Q5T6H7;Q9NQW7;Q5T6H3;Q5T6H2	Q5T6H7;Q9NQW7	Xaa-Pro aminopeptidase 1	XPNPEP1	tr|Q5T6H7|Q5T6H7_HUMAN Xaa-Pro aminopeptidase 1 OS=Homo sapiens GN=XPNPEP1 PE=1 SV=1;sp|Q9NQW7|XPP1_HUMAN Xaa-Pro aminopeptidase 1 OS=Homo sapiens GN=XPNPEP1 PE=1 SV=3	62138	0	51838	0	361910	278950
Q5T6V5;Q5T6V7	Q5T6V5	UPF0553 protein C9orf64	C9orf64	sp|Q5T6V5|CI064_HUMAN UPF0553 protein C9orf64 OS=Homo sapiens GN=C9orf64 PE=1 SV=1	39028	0	12035	0	156030	283420
Q5TDP6	Q5TDP6	Lengsin	LGSN	sp|Q5TDP6|LGSN_HUMAN Lengsin OS=Homo sapiens GN=LGSN PE=1 SV=1	57277	0.009375	13812	0	0	135930
Q5VTT5	Q5VTT5	Myomesin-3	MYOM3	sp|Q5VTT5|MYOM3_HUMAN Myomesin-3 OS=Homo sapiens GN=MYOM3 PE=2 SV=1	162.19	0	194.4	4986900	8245500	3312900
Q5VVH5	Q5VVH5	Interleukin-1 receptor-associated kinase 1-binding protein 1	IRAK1BP1	sp|Q5VVH5|IKBP1_HUMAN Interleukin-1 receptor-associated kinase 1-binding protein 1 OS=Homo sapiens GN=IRAK1BP1 PE=1 SV=1	29106	0.0063949	14878	0	0	0
Q5VVM3;Q9HAB8	Q5VVM3;Q9HAB8	Phosphopantothenate--cysteine ligase	PPCS	tr|Q5VVM3|Q5VVM3_HUMAN Phosphopantothenate--cysteine ligase OS=Homo sapiens GN=PPCS PE=1 SV=1;sp|Q9HAB8|PPCS_HUMAN Phosphopantothenate--cysteine ligase OS=Homo sapiens GN=PPCS PE=1 SV=2	22658	0	27944	0	95121	180910
Q5VW32;F5GXQ0;Q5VW33	Q5VW32;F5GXQ0	BRO1 domain-containing protein BROX	BROX	sp|Q5VW32|BROX_HUMAN BRO1 domain-containing protein BROX OS=Homo sapiens GN=BROX PE=1 SV=1;tr|F5GXQ0|F5GXQ0_HUMAN BRO1 domain-containing protein BROX OS=Homo sapiens GN=BROX PE=1 SV=1	46476	0	47252	0	205300	178320
S4R400;Q5VW36	S4R400;Q5VW36	Focadhesin	FOCAD	tr|S4R400|S4R400_HUMAN Focadhesin OS=Homo sapiens GN=FOCAD PE=1 SV=2;sp|Q5VW36|FOCAD_HUMAN Focadhesin OS=Homo sapiens GN=FOCAD PE=1 SV=1	136.37	0	27095	0	9292.2	8152.9
Q5VWZ2	Q5VWZ2	Lysophospholipase-like protein 1	LYPLAL1	sp|Q5VWZ2|LYPL1_HUMAN Lysophospholipase-like protein 1 OS=Homo sapiens GN=LYPLAL1 PE=1 SV=3	26316	0	11.86	330400	540420	1263800
Q5VZR0;Q9H4G4;A0A087WUM5	Q5VZR0;Q9H4G4;A0A087WUM5	Golgi-associated plant pathogenesis-related protein 1	GLIPR2	tr|Q5VZR0|Q5VZR0_HUMAN Golgi-associated plant pathogenesis-related protein 1 OS=Homo sapiens GN=GLIPR2 PE=1 SV=1;sp|Q9H4G4|GAPR1_HUMAN Golgi-associated plant pathogenesis-related protein 1 OS=Homo sapiens GN=GLIPR2 PE=1 SV=3;tr|A0A087WUM5|A0A087WUM5_HUMAN	14213	0	12751	1018000	0	0
Q5XPI4;C9JS59;C9J266;C9JI97;H7C3U1;F8WB91;C9JN91	Q5XPI4;C9JS59;C9J266	E3 ubiquitin-protein ligase RNF123	RNF123	sp|Q5XPI4|RN123_HUMAN E3 ubiquitin-protein ligase RNF123 OS=Homo sapiens GN=RNF123 PE=1 SV=1;tr|C9JS59|C9JS59_HUMAN E3 ubiquitin-protein ligase RNF123 OS=Homo sapiens GN=RNF123 PE=1 SV=1;tr|C9J266|C9J266_HUMAN E3 ubiquitin-protein ligase RNF123 OS=Homo sap	148.51	0	13778	0	348460	472980
Q63HM9	Q63HM9	PI-PLC X domain-containing protein 3	PLCXD3	sp|Q63HM9|PLCX3_HUMAN PI-PLC X domain-containing protein 3 OS=Homo sapiens GN=PLCXD3 PE=2 SV=2	36312	0	47931	0	0	60805
Q68CP9;F8WCU9	Q68CP9;F8WCU9	AT-rich interactive domain-containing protein 2	ARID2	sp|Q68CP9|ARID2_HUMAN AT-rich interactive domain-containing protein 2 OS=Homo sapiens GN=ARID2 PE=1 SV=2;tr|F8WCU9|F8WCU9_HUMAN AT-rich interactive domain-containing protein 2 OS=Homo sapiens GN=ARID2 PE=1 SV=1	197.39	0.0063796	1476	135900	0	0
Q6DHV7	Q6DHV7	Adenosine deaminase-like protein	ADAL	sp|Q6DHV7|ADAL_HUMAN Adenosine deaminase-like protein OS=Homo sapiens GN=ADAL PE=2 SV=2	40263	0.0017241	2113	0	15276	0
Q6IBS0;D6RG15;H0Y858	Q6IBS0;D6RG15	Twinfilin-2	TWF2	sp|Q6IBS0|TWF2_HUMAN Twinfilin-2 OS=Homo sapiens GN=TWF2 PE=1 SV=2;tr|D6RG15|D6RG15_HUMAN Twinfilin-2 OS=Homo sapiens GN=TWF2 PE=1 SV=1	39548	0	62611	0	218120	231980
Q6NXR6;Q86TU7	Q6NXR6;Q86TU7	Histone-lysine N-methyltransferase setd3	SETD3	tr|Q6NXR6|Q6NXR6_HUMAN Histone-lysine N-methyltransferase setd3 OS=Homo sapiens GN=SETD3 PE=1 SV=1;sp|Q86TU7|SETD3_HUMAN Histone-lysine N-methyltransferase setd3 OS=Homo sapiens GN=SETD3 PE=1 SV=1	33329	0.0056772	15493	0	0	16636
Q6NZI2	Q6NZI2	Polymerase I and transcript release factor	PTRF	sp|Q6NZI2|PTRF_HUMAN Polymerase I and transcript release factor OS=Homo sapiens GN=PTRF PE=1 SV=1	43476	0	96209	783620	771610	771910
Q6P2Q9;I3L3Z8	Q6P2Q9;I3L3Z8	Pre-mRNA-processing-splicing factor 8	PRPF8	sp|Q6P2Q9|PRP8_HUMAN Pre-mRNA-processing-splicing factor 8 OS=Homo sapiens GN=PRPF8 PE=1 SV=2;tr|I3L3Z8|I3L3Z8_HUMAN Pre-mRNA-processing-splicing factor 8 (Fragment) OS=Homo sapiens GN=PRPF8 PE=1 SV=1	273.6	0	27209	0	12507	17702
Q6SZW1	Q6SZW1	Sterile alpha and TIR motif-containing protein 1	SARM1	sp|Q6SZW1|SARM1_HUMAN Sterile alpha and TIR motif-containing protein 1 OS=Homo sapiens GN=SARM1 PE=1 SV=1	79387	0	50149	0	16845	21705
Q6UWP2;A0A087WYV4;A0A087X0R1;A0A087WZN3	Q6UWP2;A0A087WYV4;A0A087X0R1;A0A087WZN3	Dehydrogenase/reductase SDR family member 11	DHRS11	sp|Q6UWP2|DHR11_HUMAN Dehydrogenase/reductase SDR family member 11 OS=Homo sapiens GN=DHRS11 PE=1 SV=1;tr|A0A087WYV4|A0A087WYV4_HUMAN Dehydrogenase/reductase SDR family member 11 OS=Homo sapiens GN=DHRS11 PE=1 SV=1;tr|A0A087X0R1|A0A087X0R1_HUMAN Dehydrogen	28308	0	66381	0	0	177710
Q6UWP8	Q6UWP8	Suprabasin	SBSN	sp|Q6UWP8|SBSN_HUMAN Suprabasin OS=Homo sapiens GN=SBSN PE=1 SV=2	60.54	0.0093385	13596	318560	0	0
Q6UXN9	Q6UXN9	WD repeat-containing protein 82	WDR82	sp|Q6UXN9|WDR82_HUMAN WD repeat-containing protein 82 OS=Homo sapiens GN=WDR82 PE=1 SV=1	35079	0	37613	0	173850	253180
Q6YN16	Q6YN16	Hydroxysteroid dehydrogenase-like protein 2	HSDL2	sp|Q6YN16|HSDL2_HUMAN Hydroxysteroid dehydrogenase-like protein 2 OS=Homo sapiens GN=HSDL2 PE=1 SV=1	45394	0	21795	0	162200	114170
Q6ZMU5	Q6ZMU5	Tripartite motif-containing protein 72	TRIM72	sp|Q6ZMU5|TRI72_HUMAN Tripartite motif-containing protein 72 OS=Homo sapiens GN=TRIM72 PE=1 SV=2	52.73	0.0056543	15361	0	10471	0
Q6ZVM7;K7ENB0;B7Z2U2	Q6ZVM7;K7ENB0;B7Z2U2	TOM1-like protein 2	TOM1L2	sp|Q6ZVM7|TM1L2_HUMAN TOM1-like protein 2 OS=Homo sapiens GN=TOM1L2 PE=1 SV=1;tr|K7ENB0|K7ENB0_HUMAN TOM1-like protein 2 (Fragment) OS=Homo sapiens GN=TOM1L2 PE=1 SV=1;tr|B7Z2U2|B7Z2U2_HUMAN TOM1-like protein 2 OS=Homo sapiens GN=TOM1L2 PE=1 SV=1	55556	0	56947	0	50685	98643
Q702N8	Q702N8	Xin actin-binding repeat-containing protein 1	XIRP1	sp|Q702N8|XIRP1_HUMAN Xin actin-binding repeat-containing protein 1 OS=Homo sapiens GN=XIRP1 PE=1 SV=1	198.56	0	39928	387100	284020	197180
Q709C8	Q709C8	Vacuolar protein sorting-associated protein 13C	VPS13C	sp|Q709C8|VP13C_HUMAN Vacuolar protein sorting-associated protein 13C OS=Homo sapiens GN=VPS13C PE=1 SV=1	422.39	0	28583	0	6243.8	0
Q71U36;Q13748;Q6PEY2;F8VQQ4	Q71U36;Q13748;Q6PEY2;F8VQQ4	Tubulin alpha-1A chain;Tubulin alpha-3C/D chain;Tubulin alpha-3E chain	TUBA1A;TUBA3C;TUBA3E	sp|Q71U36|TBA1A_HUMAN Tubulin alpha-1A chain OS=Homo sapiens GN=TUBA1A PE=1 SV=1;sp|Q13748|TBA3C_HUMAN Tubulin alpha-3C/D chain OS=Homo sapiens GN=TUBA3C PE=1 SV=3;sp|Q6PEY2|TBA3E_HUMAN Tubulin alpha-3E chain OS=Homo sapiens GN=TUBA3E PE=1 SV=2;tr|F8VQQ4|F	50135	0	22218	0	0	95252
Q7KZF4;H7C597	Q7KZF4	Staphylococcal nuclease domain-containing protein 1	SND1	sp|Q7KZF4|SND1_HUMAN Staphylococcal nuclease domain-containing protein 1 OS=Homo sapiens GN=SND1 PE=1 SV=1	102	0	26.27	379210	556800	455600
Q7L4E1	Q7L4E1	Protein FAM73B	FAM73B	sp|Q7L4E1|MIGA2_HUMAN Mitoguardin-2 OS=Homo sapiens GN=FAM73B PE=1 SV=1	65.53	0.0093604	13663	0	0	9696.7
Q7L523;Q5VZM0;Q5VZM2	Q7L523;Q5VZM0;Q5VZM2	Ras-related GTP-binding protein A;Ras-related GTP-binding protein B	RRAGA;RRAGB	sp|Q7L523|RRAGA_HUMAN Ras-related GTP-binding protein A OS=Homo sapiens GN=RRAGA PE=1 SV=1;tr|Q5VZM0|Q5VZM0_HUMAN Ras-related GTP-binding protein B (Fragment) OS=Homo sapiens GN=RRAGB PE=1 SV=1;sp|Q5VZM2|RRAGB_HUMAN Ras-related GTP-binding protein B OS=Hom	36566	0	18694	0	187410	337940
Q7L576;A0A0G2JQH3;A0A087WVZ5	Q7L576	Cytoplasmic FMR1-interacting protein 1	CYFIP1	sp|Q7L576|CYFP1_HUMAN Cytoplasmic FMR1-interacting protein 1 OS=Homo sapiens GN=CYFIP1 PE=1 SV=1	145.18	0	26807	479980	404800	431530
Q7L5D6;C9JPA8;C9JHN8	Q7L5D6;C9JPA8;C9JHN8	Golgi to ER traffic protein 4 homolog	GET4	sp|Q7L5D6|GET4_HUMAN Golgi to ER traffic protein 4 homolog OS=Homo sapiens GN=GET4 PE=1 SV=1;tr|C9JPA8|C9JPA8_HUMAN Golgi to ER traffic protein 4 homolog (Fragment) OS=Homo sapiens GN=GET4 PE=1 SV=2;tr|C9JHN8|C9JHN8_HUMAN Golgi to ER traffic protein 4 homo	36504	0	26631	0	0	144120
Q7L775	Q7L775	EPM2A-interacting protein 1	EPM2AIP1	sp|Q7L775|EPMIP_HUMAN EPM2A-interacting protein 1 OS=Homo sapiens GN=EPM2AIP1 PE=1 SV=1	70369	0.0093897	13838	0	0	21226
Q9H8S9;Q7L9L4	Q9H8S9;Q7L9L4	MOB kinase activator 1A;MOB kinase activator 1B	MOB1A;MOB1B	sp|Q9H8S9|MOB1A_HUMAN MOB kinase activator 1A OS=Homo sapiens GN=MOB1A PE=1 SV=4;sp|Q7L9L4|MOB1B_HUMAN MOB kinase activator 1B OS=Homo sapiens GN=MOB1B PE=1 SV=3	25079	0	13441	0	167340	525220
Q7RTS9	Q7RTS9	Dymeclin	DYM	sp|Q7RTS9|DYM_HUMAN Dymeclin OS=Homo sapiens GN=DYM PE=1 SV=1	75935	0	31047	0	0	14572
Q7Z5P9	Q7Z5P9	Mucin-19	MUC19	sp|Q7Z5P9|MUC19_HUMAN Mucin-19 OS=Homo sapiens GN=MUC19 PE=1 SV=3	805.24	0.0025168	18523	0	0	5969600
Q7Z6Z7;H0Y659	Q7Z6Z7	E3 ubiquitin-protein ligase HUWE1	HUWE1	sp|Q7Z6Z7|HUWE1_HUMAN E3 ubiquitin-protein ligase HUWE1 OS=Homo sapiens GN=HUWE1 PE=1 SV=3	481.89	0	11384	0	124860	139130
Q7Z7L7	Q7Z7L7	Protein zer-1 homolog	ZER1	sp|Q7Z7L7|ZER1_HUMAN Protein zer-1 homolog OS=Homo sapiens GN=ZER1 PE=1 SV=1	88169	0	66777	0	0	33085
Q86SZ2;G3V4C3;G3V2H7	Q86SZ2;G3V4C3;G3V2H7	Trafficking protein particle complex subunit 6B	TRAPPC6B	sp|Q86SZ2|TPC6B_HUMAN Trafficking protein particle complex subunit 6B OS=Homo sapiens GN=TRAPPC6B PE=1 SV=1;tr|G3V4C3|G3V4C3_HUMAN Trafficking protein particle complex subunit 6B OS=Homo sapiens GN=TRAPPC6B PE=1 SV=1;tr|G3V2H7|G3V2H7_HUMAN Trafficking prot	17983	0	63153	0	98383	142690
Q86TI2;M0QXI5;M0R2A8;M0R1L4	Q86TI2	Dipeptidyl peptidase 9	DPP9	sp|Q86TI2|DPP9_HUMAN Dipeptidyl peptidase 9 OS=Homo sapiens GN=DPP9 PE=1 SV=3	98262	0	16066	0	207750	237900
Q86TP1;Q5SZF2;Q5SZG1	Q86TP1	Protein prune homolog	PRUNE	sp|Q86TP1|PRUNE_HUMAN Protein prune homolog OS=Homo sapiens GN=PRUNE PE=1 SV=2	50199	0	18916	51015	172140	464520
Q86TX2;G3V4F2	Q86TX2;G3V4F2	Acyl-coenzyme A thioesterase 1	ACOT1	sp|Q86TX2|ACOT1_HUMAN Acyl-coenzyme A thioesterase 1 OS=Homo sapiens GN=ACOT1 PE=1 SV=1;tr|G3V4F2|G3V4F2_HUMAN Acyl-coenzyme A thioesterase 1 OS=Homo sapiens GN=ACOT1 PE=1 SV=1	46277	0	85.2	4181600	3246700	957130
Q86VN1	Q86VN1	Vacuolar protein-sorting-associated protein 36	VPS36	sp|Q86VN1|VPS36_HUMAN Vacuolar protein-sorting-associated protein 36 OS=Homo sapiens GN=VPS36 PE=1 SV=1	43816	0	71051	0	0	84688
Q86VP6;A0A0C4DGH5;H0YH27	Q86VP6;A0A0C4DGH5	Cullin-associated NEDD8-dissociated protein 1	CAND1	sp|Q86VP6|CAND1_HUMAN Cullin-associated NEDD8-dissociated protein 1 OS=Homo sapiens GN=CAND1 PE=1 SV=2;tr|A0A0C4DGH5|A0A0C4DGH5_HUMAN Cullin-associated NEDD8-dissociated protein 1 (Fragment) OS=Homo sapiens GN=CAND1 PE=1 SV=1	136.37	0	150.8	758750	2246200	2975000
Q86X76	Q86X76	Nitrilase homolog 1	NIT1	sp|Q86X76|NIT1_HUMAN Nitrilase homolog 1 OS=Homo sapiens GN=NIT1 PE=1 SV=2	35896	0	14014	316350	536820	634370
Q8IV08	Q8IV08	Phospholipase D3	PLD3	sp|Q8IV08|PLD3_HUMAN Phospholipase D3 OS=Homo sapiens GN=PLD3 PE=1 SV=1	54705	0	37321	0	12334	0
Q8IW45	Q8IW45	ATP-dependent (S)-NAD(P)H-hydrate dehydratase	CARKD	sp|Q8IW45|NNRD_HUMAN ATP-dependent (S)-NAD(P)H-hydrate dehydratase OS=Homo sapiens GN=NAXD PE=1 SV=1	36576	0	31279	219760	1021100	759900
Q8IWV7	Q8IWV7	E3 ubiquitin-protein ligase UBR1	UBR1	sp|Q8IWV7|UBR1_HUMAN E3 ubiquitin-protein ligase UBR1 OS=Homo sapiens GN=UBR1 PE=1 SV=1	200.21	0	13487	0	40176	62801
Q8IWX7	Q8IWX7	Protein unc-45 homolog B	UNC45B	sp|Q8IWX7|UN45B_HUMAN Protein unc-45 homolog B OS=Homo sapiens GN=UNC45B PE=1 SV=1	103.73	0	170.22	1236000	1665900	2881100
Q8IZ83;F5H4B6	Q8IZ83;F5H4B6	Aldehyde dehydrogenase family 16 member A1	ALDH16A1	sp|Q8IZ83|A16A1_HUMAN Aldehyde dehydrogenase family 16 member A1 OS=Homo sapiens GN=ALDH16A1 PE=1 SV=2;tr|F5H4B6|F5H4B6_HUMAN Aldehyde dehydrogenase family 16 member A1 OS=Homo sapiens GN=ALDH16A1 PE=1 SV=1	85126	0	60451	0	14071	6381.5
Q8N142;G3V5D8;G3V232;S4R2Z1;G3V2N1	Q8N142	Adenylosuccinate synthetase isozyme 1	ADSSL1	sp|Q8N142|PURA1_HUMAN Adenylosuccinate synthetase isozyme 1 OS=Homo sapiens GN=ADSSL1 PE=1 SV=1	50208	0	90139	1118300	1719100	2134300
Q8N1G4	Q8N1G4	Leucine-rich repeat-containing protein 47	LRRC47	sp|Q8N1G4|LRC47_HUMAN Leucine-rich repeat-containing protein 47 OS=Homo sapiens GN=LRRC47 PE=1 SV=1	63472	0	70427	0	222160	139480
Q8N335;C9JFA7;C9K0P5;C9JM46	Q8N335;C9JFA7;C9K0P5	Glycerol-3-phosphate dehydrogenase 1-like protein	GPD1L	sp|Q8N335|GPD1L_HUMAN Glycerol-3-phosphate dehydrogenase 1-like protein OS=Homo sapiens GN=GPD1L PE=1 SV=1;tr|C9JFA7|C9JFA7_HUMAN Glycerol-3-phosphate dehydrogenase 1-like protein (Fragment) OS=Homo sapiens GN=GPD1L PE=1 SV=1;tr|C9K0P5|C9K0P5_HUMAN Glycero	38418	0	25379	344920	1603300	2564800
Q8N5J2	Q8N5J2	Protein FAM63A	FAM63A	sp|Q8N5J2|FA63A_HUMAN Protein FAM63A OS=Homo sapiens GN=FAM63A PE=1 SV=2	51777	0	27599	0	79045	162950
Q8N5M1	Q8N5M1	ATP synthase mitochondrial F1 complex assembly factor 2	ATPAF2	sp|Q8N5M1|ATPF2_HUMAN ATP synthase mitochondrial F1 complex assembly factor 2 OS=Homo sapiens GN=ATPAF2 PE=1 SV=1	32772	0.0086957	14123	0	0	12657
Q8NBF2	Q8NBF2	NHL repeat-containing protein 2	NHLRC2	sp|Q8NBF2|NHLC2_HUMAN NHL repeat-containing protein 2 OS=Homo sapiens GN=NHLRC2 PE=1 SV=1	79443	0	25.47	0	218590	185170
Q8NFW8	Q8NFW8	N-acylneuraminate cytidylyltransferase	CMAS	sp|Q8NFW8|NEUA_HUMAN N-acylneuraminate cytidylyltransferase OS=Homo sapiens GN=CMAS PE=1 SV=2	48379	0	28623	0	0	45812
Q8NGR8	Q8NGR8	Olfactory receptor 1L8	OR1L8	sp|Q8NGR8|OR1L8_HUMAN Olfactory receptor 1L8 OS=Homo sapiens GN=OR1L8 PE=2 SV=1	35082	0.0093677	13676	0	31318	0
Q8TAT6;I3L4U9;I3L283;A0A0D9SFI9;I3L3I1	Q8TAT6	Nuclear protein localization protein 4 homolog	NPLOC4	sp|Q8TAT6|NPL4_HUMAN Nuclear protein localization protein 4 homolog OS=Homo sapiens GN=NPLOC4 PE=1 SV=3	68119	0	24.87	249130	422750	526580
Q8TBC4;F8W8D4;F8WF86	Q8TBC4;F8W8D4	NEDD8-activating enzyme E1 catalytic subunit	UBA3	sp|Q8TBC4|UBA3_HUMAN NEDD8-activating enzyme E1 catalytic subunit OS=Homo sapiens GN=UBA3 PE=1 SV=2;tr|F8W8D4|F8W8D4_HUMAN NEDD8-activating enzyme E1 catalytic subunit OS=Homo sapiens GN=UBA3 PE=1 SV=1	51852	0	26687	115640	256240	182180
Q8TC07	Q8TC07	TBC1 domain family member 15	TBC1D15	sp|Q8TC07|TBC15_HUMAN TBC1 domain family member 15 OS=Homo sapiens GN=TBC1D15 PE=1 SV=2	79.49	0.0025189	18531	0	0	39496
Q8TD16	Q8TD16	Protein bicaudal D homolog 2	BICD2	sp|Q8TD16|BICD2_HUMAN Protein bicaudal D homolog 2 OS=Homo sapiens GN=BICD2 PE=1 SV=1	93532	0	27195	0	0	348100
Q8TD19	Q8TD19	Serine/threonine-protein kinase Nek9	NEK9	sp|Q8TD19|NEK9_HUMAN Serine/threonine-protein kinase Nek9 OS=Homo sapiens GN=NEK9 PE=1 SV=2	107.17	0	54732	0	0	72538
Q8WUM4;C9IZF9;F8WEQ7;F8WBR8;F8WDK9	Q8WUM4	Programmed cell death 6-interacting protein	PDCD6IP	sp|Q8WUM4|PDC6I_HUMAN Programmed cell death 6-interacting protein OS=Homo sapiens GN=PDCD6IP PE=1 SV=1	96022	0	57684	1329700	1709600	1431600
Q8WVM8;J3KNG4;G3V2M8;G3V4I1;G3V5F3;H0YJY1;G3V3K9;G3V5E2;G3V363;H0YJS6	Q8WVM8	Sec1 family domain-containing protein 1	SCFD1	sp|Q8WVM8|SCFD1_HUMAN Sec1 family domain-containing protein 1 OS=Homo sapiens GN=SCFD1 PE=1 SV=4	72379	0	60325	0	373930	411250
Q8WWI5	Q8WWI5	Choline transporter-like protein 1	SLC44A1	sp|Q8WWI5|CTL1_HUMAN Choline transporter-like protein 1 OS=Homo sapiens GN=SLC44A1 PE=1 SV=1	73301	0.0016964	19531	0	116860	0
Q8WX93;H0YA05	Q8WX93;H0YA05	Palladin	PALLD	sp|Q8WX93|PALLD_HUMAN Palladin OS=Homo sapiens GN=PALLD PE=1 SV=3;tr|H0YA05|H0YA05_HUMAN Palladin (Fragment) OS=Homo sapiens GN=PALLD PE=1 SV=1	150.56	0	27482	0	33500	0
Q8WXI4	Q8WXI4	Acyl-coenzyme A thioesterase 11	ACOT11	sp|Q8WXI4|ACO11_HUMAN Acyl-coenzyme A thioesterase 11 OS=Homo sapiens GN=ACOT11 PE=1 SV=1	68491	0	56286	0	0	169310
Q92523	Q92523	Carnitine O-palmitoyltransferase 1, muscle isoform	CPT1B	sp|Q92523|CPT1B_HUMAN Carnitine O-palmitoyltransferase 1, muscle isoform OS=Homo sapiens GN=CPT1B PE=1 SV=2	87.8	0	61177	0	42522	38301
Q92597;E5RIR1;E5RGM5;E5RIV1;E5RIM2;E5RJ98;E5RG99;E5RJY1;E5RI76;E7ESM1;E5RH82;E5RK17	Q92597;E5RIR1;E5RGM5;E5RIV1;E5RIM2	Protein NDRG1	NDRG1	sp|Q92597|NDRG1_HUMAN Protein NDRG1 OS=Homo sapiens GN=NDRG1 PE=1 SV=1;tr|E5RIR1|E5RIR1_HUMAN Protein NDRG1 (Fragment) OS=Homo sapiens GN=NDRG1 PE=1 SV=1;tr|E5RGM5|E5RGM5_HUMAN Protein NDRG1 (Fragment) OS=Homo sapiens GN=NDRG1 PE=1 SV=1;tr|E5RIV1|E5RIV1_HU	42835	0	13835	231930	277520	0
Q92629	Q92629	Delta-sarcoglycan	SGCD	sp|Q92629|SGCD_HUMAN Delta-sarcoglycan OS=Homo sapiens GN=SGCD PE=1 SV=2	32071	0.002459	1619	0	0	124940
Q92696;H0YLH3;H0YKZ8;H0YMG5;H0YLG7;H0YKP6	Q92696;H0YLH3	Geranylgeranyl transferase type-2 subunit alpha	RABGGTA	sp|Q92696|PGTA_HUMAN Geranylgeranyl transferase type-2 subunit alpha OS=Homo sapiens GN=RABGGTA PE=1 SV=2;tr|H0YLH3|H0YLH3_HUMAN Geranylgeranyl transferase type-2 subunit alpha OS=Homo sapiens GN=RABGGTA PE=1 SV=1	65071	0	34787	246500	710310	1459000
Q92882	Q92882	Osteoclast-stimulating factor 1	OSTF1	sp|Q92882|OSTF1_HUMAN Osteoclast-stimulating factor 1 OS=Homo sapiens GN=OSTF1 PE=1 SV=2	23787	0	34517	0	0	8525.2
Q92900	Q92900	Regulator of nonsense transcripts 1	UPF1	sp|Q92900|RENT1_HUMAN Regulator of nonsense transcripts 1 OS=Homo sapiens GN=UPF1 PE=1 SV=2	124.34	0	33111	0	0	17967
Q92905;E5RHH5;E5RHF2	Q92905;E5RHH5	COP9 signalosome complex subunit 5	COPS5	sp|Q92905|CSN5_HUMAN COP9 signalosome complex subunit 5 OS=Homo sapiens GN=COPS5 PE=1 SV=4;tr|E5RHH5|E5RHH5_HUMAN COP9 signalosome complex subunit 5 OS=Homo sapiens GN=COPS5 PE=1 SV=1	37578	0	18415	0	302080	476430
Q92973;E7EW37;S4R398	Q92973	Transportin-1	TNPO1	sp|Q92973|TNPO1_HUMAN Transportin-1 OS=Homo sapiens GN=TNPO1 PE=1 SV=2	102.35	0	65542	88189	1342200	1427600
Q93008;O00507	Q93008	Probable ubiquitin carboxyl-terminal hydrolase FAF-X	USP9X	sp|Q93008|USP9X_HUMAN Probable ubiquitin carboxyl-terminal hydrolase FAF-X OS=Homo sapiens GN=USP9X PE=1 SV=3	292.28	0	13071	0	166600	226040
Q93009	Q93009	Ubiquitin carboxyl-terminal hydrolase 7	USP7	sp|Q93009|UBP7_HUMAN Ubiquitin carboxyl-terminal hydrolase 7 OS=Homo sapiens GN=USP7 PE=1 SV=2	128.3	0.00090416	24647	0	0	19328
Q93034;H0YCA0	Q93034	Cullin-5	CUL5	sp|Q93034|CUL5_HUMAN Cullin-5 OS=Homo sapiens GN=CUL5 PE=1 SV=4	90954	0	53898	388670	433660	610650
Q93100;I3L3F2;I3L0Z1;H3BV13;I3NHZ9;H3BQ89	Q93100	Phosphorylase b kinase regulatory subunit beta	PHKB	sp|Q93100|KPBB_HUMAN Phosphorylase b kinase regulatory subunit beta OS=Homo sapiens GN=PHKB PE=1 SV=3	124.88	0	41168	77268	377160	470340
Q9NVJ2;Q96BM9	Q9NVJ2;Q96BM9	ADP-ribosylation factor-like protein 8B;ADP-ribosylation factor-like protein 8A	ARL8B;ARL8A	sp|Q9NVJ2|ARL8B_HUMAN ADP-ribosylation factor-like protein 8B OS=Homo sapiens GN=ARL8B PE=1 SV=1;sp|Q96BM9|ARL8A_HUMAN ADP-ribosylation factor-like protein 8A OS=Homo sapiens GN=ARL8A PE=1 SV=1	21539	0.00086957	21642	0	11567	0
Q96C23;B8ZZ75;H7C320;H7C1B5	Q96C23;B8ZZ75;H7C320;H7C1B5	Aldose 1-epimerase	GALM	sp|Q96C23|GALM_HUMAN Aldose 1-epimerase OS=Homo sapiens GN=GALM PE=1 SV=1;tr|B8ZZ75|B8ZZ75_HUMAN Aldose 1-epimerase OS=Homo sapiens GN=GALM PE=1 SV=1;tr|H7C320|H7C320_HUMAN Aldose 1-epimerase (Fragment) OS=Homo sapiens GN=GALM PE=1 SV=1;tr|H7C1B5|H7C1B5_HU	37765	0	25709	0	136430	368840
Q96C86	Q96C86	m7GpppX diphosphatase	DCPS	sp|Q96C86|DCPS_HUMAN m7GpppX diphosphatase OS=Homo sapiens GN=DCPS PE=1 SV=2	38608	0	27817	0	0	23782
Q96CN7;D6RGE2	Q96CN7;D6RGE2	Isochorismatase domain-containing protein 1	ISOC1	sp|Q96CN7|ISOC1_HUMAN Isochorismatase domain-containing protein 1 OS=Homo sapiens GN=ISOC1 PE=1 SV=3;tr|D6RGE2|D6RGE2_HUMAN Isochorismatase domain-containing protein 1 (Fragment) OS=Homo sapiens GN=ISOC1 PE=1 SV=1	32236	0	56919	1693100	4010700	5596900
Q96CX2	Q96CX2	BTB/POZ domain-containing protein KCTD12	KCTD12	sp|Q96CX2|KCD12_HUMAN BTB/POZ domain-containing protein KCTD12 OS=Homo sapiens GN=KCTD12 PE=1 SV=1	35.7	0	39496	0	51144	61520
Q96DE0	Q96DE0	U8 snoRNA-decapping enzyme	NUDT16	sp|Q96DE0|NUD16_HUMAN U8 snoRNA-decapping enzyme OS=Homo sapiens GN=NUDT16 PE=1 SV=2	21273	0	34536	0	158120	107700
Q96DG6	Q96DG6	Carboxymethylenebutenolidase homolog	CMBL	sp|Q96DG6|CMBL_HUMAN Carboxymethylenebutenolidase homolog OS=Homo sapiens GN=CMBL PE=1 SV=1	28048	0	39519	601630	3317800	3583800
Q96FJ2;P63167	Q96FJ2;P63167	Dynein light chain 2, cytoplasmic;Dynein light chain 1, cytoplasmic	DYNLL2;DYNLL1	sp|Q96FJ2|DYL2_HUMAN Dynein light chain 2, cytoplasmic OS=Homo sapiens GN=DYNLL2 PE=1 SV=1;sp|P63167|DYL1_HUMAN Dynein light chain 1, cytoplasmic OS=Homo sapiens GN=DYNLL1 PE=1 SV=1	10.35	0	29044	0	0	983090
Q96GD0	Q96GD0	Pyridoxal phosphate phosphatase	PDXP	sp|Q96GD0|PLPP_HUMAN Pyridoxal phosphate phosphatase OS=Homo sapiens GN=PDXP PE=1 SV=2	31698	0	7164	0	59392	58367
Q96H20	Q96H20	Vacuolar-sorting protein SNF8	SNF8	sp|Q96H20|SNF8_HUMAN Vacuolar-sorting protein SNF8 OS=Homo sapiens GN=SNF8 PE=1 SV=1	28864	0	50994	0	0	136880
Q96HC4;H0Y8Y3;H0YBI4;A0A0A0MSP3;H0Y929;A0A0D9SFR4	Q96HC4;H0Y8Y3	PDZ and LIM domain protein 5	PDLIM5	sp|Q96HC4|PDLI5_HUMAN PDZ and LIM domain protein 5 OS=Homo sapiens GN=PDLIM5 PE=1 SV=5;tr|H0Y8Y3|H0Y8Y3_HUMAN PDZ and LIM domain protein 5 (Fragment) OS=Homo sapiens GN=PDLIM5 PE=1 SV=1	63944	0	30847	218310	1016600	1308300
Q96HR9	Q96HR9	Receptor expression-enhancing protein 6	REEP6	sp|Q96HR9|REEP6_HUMAN Receptor expression-enhancing protein 6 OS=Homo sapiens GN=REEP6 PE=1 SV=1	20733	0.0025424	19334	0	0	71500
Q96IJ6;C9J255;F8WD54;A0A087WUI8;A0A0U1RRC2;C9JAH0	Q96IJ6;C9J255;F8WD54;A0A087WUI8	Mannose-1-phosphate guanyltransferase alpha	GMPPA	sp|Q96IJ6|GMPPA_HUMAN Mannose-1-phosphate guanyltransferase alpha OS=Homo sapiens GN=GMPPA PE=1 SV=1;tr|C9J255|C9J255_HUMAN Mannose-1-phosphate guanyltransferase alpha (Fragment) OS=Homo sapiens GN=GMPPA PE=1 SV=3;tr|F8WD54|F8WD54_HUMAN Mannose-1-phosphate	46291	0	47911	0	79181	149290
Q96JB5;J3QRM1;J3QQY1;J3QL86;J3KRI2;J3KRK4;J3KS63;J3QS62	Q96JB5;J3QRM1;J3QQY1	CDK5 regulatory subunit-associated protein 3	CDK5RAP3	sp|Q96JB5|CK5P3_HUMAN CDK5 regulatory subunit-associated protein 3 OS=Homo sapiens GN=CDK5RAP3 PE=1 SV=2;tr|J3QRM1|J3QRM1_HUMAN CDK5 regulatory subunit-associated protein 3 (Fragment) OS=Homo sapiens GN=CDK5RAP3 PE=1 SV=1;tr|J3QQY1|J3QQY1_HUMAN CDK5 regula	56.92	0	37734	136740	189490	302240
Q96KP1	Q96KP1	Exocyst complex component 2	EXOC2	sp|Q96KP1|EXOC2_HUMAN Exocyst complex component 2 OS=Homo sapiens GN=EXOC2 PE=1 SV=1	104.07	0	66239	0	82289	63719
Q96KP4;J3QKT2;J3KRD5;J3QQN6;J3QR27;J3QLU1;A0A087WVS2;J3QKQ0;J3QRD0;J3QL02;J3KSV5;A0A087WYZ1;J3QRA8;J3KSS4;J3QRH4	Q96KP4;J3QKT2	Cytosolic non-specific dipeptidase	CNDP2	sp|Q96KP4|CNDP2_HUMAN Cytosolic non-specific dipeptidase OS=Homo sapiens GN=CNDP2 PE=1 SV=2;tr|J3QKT2|J3QKT2_HUMAN Cytosolic non-specific dipeptidase (Fragment) OS=Homo sapiens GN=CNDP2 PE=1 SV=1	52878	0	25243	561940	585880	858390
Q96P63	Q96P63	Serpin B12	SERPINB12	sp|Q96P63|SPB12_HUMAN Serpin B12 OS=Homo sapiens GN=SERPINB12 PE=1 SV=1	46276	0	64458	1157100	0	0
Q96QK1;I3L4S0;I3L4P4	Q96QK1	Vacuolar protein sorting-associated protein 35	VPS35	sp|Q96QK1|VPS35_HUMAN Vacuolar protein sorting-associated protein 35 OS=Homo sapiens GN=VPS35 PE=1 SV=2	91706	0	190.65	551210	3289800	5104600
Q96TA1	Q96TA1	Niban-like protein 1	FAM129B	sp|Q96TA1|NIBL1_HUMAN Niban-like protein 1 OS=Homo sapiens GN=FAM129B PE=1 SV=3	84137	0	14.22	157600	413490	308560
Q99536;K7ESA3;K7ERT7;K7EJM4;K7ENX2;K7EM19;K7ER81	Q99536	Synaptic vesicle membrane protein VAT-1 homolog	VAT1	sp|Q99536|VAT1_HUMAN Synaptic vesicle membrane protein VAT-1 homolog OS=Homo sapiens GN=VAT1 PE=1 SV=2	41.92	0	49.67	2816000	631180	1249400
Q99707	Q99707	Methionine synthase	MTR	sp|Q99707|METH_HUMAN Methionine synthase OS=Homo sapiens GN=MTR PE=1 SV=2	140.53	0	45066	0	0	20427
Q99714;Q5H928	Q99714	3-hydroxyacyl-CoA dehydrogenase type-2	HSD17B10	sp|Q99714|HCD2_HUMAN 3-hydroxyacyl-CoA dehydrogenase type-2 OS=Homo sapiens GN=HSD17B10 PE=1 SV=3	26923	0	13611	0	176700	186930
Q99832;F8WAM2	Q99832	T-complex protein 1 subunit eta	CCT7	sp|Q99832|TCPH_HUMAN T-complex protein 1 subunit eta OS=Homo sapiens GN=CCT7 PE=1 SV=2	59366	0	88.04	997850	1930200	1167700
Q99959;B8QGS9	Q99959;B8QGS9	Plakophilin-2	PKP2	sp|Q99959|PKP2_HUMAN Plakophilin-2 OS=Homo sapiens GN=PKP2 PE=1 SV=2;tr|B8QGS9|B8QGS9_HUMAN Plakophilin-2 OS=Homo sapiens GN=PKP2 PE=1 SV=1	97414	0	25142	481490	1235400	1166500
Q9BPX5	Q9BPX5	Actin-related protein 2/3 complex subunit 5-like protein	ARPC5L	sp|Q9BPX5|ARP5L_HUMAN Actin-related protein 2/3 complex subunit 5-like protein OS=Homo sapiens GN=ARPC5L PE=1 SV=1	16941	0	37485	0	0	55497
Q9BQ69	Q9BQ69	O-acetyl-ADP-ribose deacetylase MACROD1	MACROD1	sp|Q9BQ69|MACD1_HUMAN O-acetyl-ADP-ribose deacetylase MACROD1 OS=Homo sapiens GN=MACROD1 PE=1 SV=2	35505	0	29163	0	0	125150
Q9BQA1;H0Y711	Q9BQA1;H0Y711	Methylosome protein 50	WDR77	sp|Q9BQA1|MEP50_HUMAN Methylosome protein 50 OS=Homo sapiens GN=WDR77 PE=1 SV=1;tr|H0Y711|H0Y711_HUMAN Methylosome protein 50 (Fragment) OS=Homo sapiens GN=WDR77 PE=1 SV=1	36724	0	78843	0	152720	236290
Q9BR76;A0A087WW53;F5H390	Q9BR76;A0A087WW53;F5H390	Coronin-1B;Coronin	CORO1B	sp|Q9BR76|COR1B_HUMAN Coronin-1B OS=Homo sapiens GN=CORO1B PE=1 SV=1;tr|A0A087WW53|A0A087WW53_HUMAN Coronin OS=Homo sapiens GN=CORO1B PE=1 SV=1;tr|F5H390|F5H390_HUMAN Coronin OS=Homo sapiens GN=CORO1B PE=1 SV=1	54234	0.0016978	19547	0	49271	0
Q9BRG1;K7ENE3;K7EKV4;K7EP45	Q9BRG1;K7ENE3;K7EKV4	Vacuolar protein-sorting-associated protein 25	VPS25	sp|Q9BRG1|VPS25_HUMAN Vacuolar protein-sorting-associated protein 25 OS=Homo sapiens GN=VPS25 PE=1 SV=1;tr|K7ENE3|K7ENE3_HUMAN Vacuolar protein-sorting-associated protein 25 (Fragment) OS=Homo sapiens GN=VPS25 PE=1 SV=1;tr|K7EKV4|K7EKV4_HUMAN Vacuolar prot	20747	0	20054	0	463150	497030
Q9BSJ8	Q9BSJ8	Extended synaptotagmin-1	ESYT1	sp|Q9BSJ8|ESYT1_HUMAN Extended synaptotagmin-1 OS=Homo sapiens GN=ESYT1 PE=1 SV=1	122.85	0	75308	0	34077	23813
Q9BV19	Q9BV19	Uncharacterized protein C1orf50	C1orf50	sp|Q9BV19|CA050_HUMAN Uncharacterized protein C1orf50 OS=Homo sapiens GN=C1orf50 PE=1 SV=2	21876	0	73148	0	0	32043
Q9BXW6;J3KRT6	Q9BXW6;J3KRT6	Oxysterol-binding protein-related protein 1	OSBPL1A	sp|Q9BXW6|OSBL1_HUMAN Oxysterol-binding protein-related protein 1 OS=Homo sapiens GN=OSBPL1A PE=1 SV=2;tr|J3KRT6|J3KRT6_HUMAN Oxysterol-binding protein-related protein 1 OS=Homo sapiens GN=OSBPL1A PE=1 SV=1	108.47	0	63049	0	34482	50042
Q9BY44;H7C5Q3;C9IZE1;F8WAE5;H7C5R5	Q9BY44;H7C5Q3;C9IZE1;F8WAE5	Eukaryotic translation initiation factor 2A;Eukaryotic translation initiation factor 2A, N-terminally processed	EIF2A	sp|Q9BY44|EIF2A_HUMAN Eukaryotic translation initiation factor 2A OS=Homo sapiens GN=EIF2A PE=1 SV=3;tr|H7C5Q3|H7C5Q3_HUMAN Eukaryotic translation initiation factor 2A (Fragment) OS=Homo sapiens GN=EIF2A PE=1 SV=1;tr|C9IZE1|C9IZE1_HUMAN Eukaryotic translat	64989	0	49161	184870	140580	228970
Q9BYV2;Q969Q1;Q9BYV6	Q9BYV2	Tripartite motif-containing protein 54	TRIM54	sp|Q9BYV2|TRI54_HUMAN Tripartite motif-containing protein 54 OS=Homo sapiens GN=TRIM54 PE=1 SV=3	40.3	0	13743	0	240510	141960
Q9BZQ8;H0Y7M9	Q9BZQ8	Protein Niban	FAM129A	sp|Q9BZQ8|NIBAN_HUMAN Protein Niban OS=Homo sapiens GN=FAM129A PE=1 SV=1	103.13	0	153.53	5588400	4466700	5960900
Q9H0E2;E9PNS3;F2Z2Y8;E7EN89	Q9H0E2;E9PNS3;F2Z2Y8;E7EN89	Toll-interacting protein	TOLLIP	sp|Q9H0E2|TOLIP_HUMAN Toll-interacting protein OS=Homo sapiens GN=TOLLIP PE=1 SV=1;tr|E9PNS3|E9PNS3_HUMAN Toll-interacting protein OS=Homo sapiens GN=TOLLIP PE=1 SV=1;tr|F2Z2Y8|F2Z2Y8_HUMAN Toll-interacting protein OS=Homo sapiens GN=TOLLIP PE=1 SV=1;tr|E7	30281	0	12922	0	0	157170
Q9H479	Q9H479	Fructosamine-3-kinase	FN3K	sp|Q9H479|FN3K_HUMAN Fructosamine-3-kinase OS=Homo sapiens GN=FN3K PE=1 SV=1	35171	0	19432	475220	1782200	1556600
Q9H4A4;A6NKB8;A0A087WU27;A0A087WUS4;H7C2T3;C9JMZ3	Q9H4A4;A6NKB8	Aminopeptidase B	RNPEP	sp|Q9H4A4|AMPB_HUMAN Aminopeptidase B OS=Homo sapiens GN=RNPEP PE=1 SV=2;tr|A6NKB8|A6NKB8_HUMAN Aminopeptidase B OS=Homo sapiens GN=RNPEP PE=1 SV=1	72595	0	24427	237870	769460	728670
Q9H511	Q9H511	Kelch-like protein 31	KLHL31	sp|Q9H511|KLH31_HUMAN Kelch-like protein 31 OS=Homo sapiens GN=KLHL31 PE=2 SV=1	70245	0	38762	142290	416120	359290
Q9H7Z7;X6RJ95;A6NHH0	Q9H7Z7;X6RJ95;A6NHH0	Prostaglandin E synthase 2;Prostaglandin E synthase 2 truncated form	PTGES2	sp|Q9H7Z7|PGES2_HUMAN Prostaglandin E synthase 2 OS=Homo sapiens GN=PTGES2 PE=1 SV=1;tr|X6RJ95|X6RJ95_HUMAN Prostaglandin E synthase 2 (Fragment) OS=Homo sapiens GN=PTGES2 PE=1 SV=1;tr|A6NHH0|A6NHH0_HUMAN Prostaglandin E synthase 2 OS=Homo sapiens GN=PTGES	41943	0	94985	0	116630	149450
Q9H8Y8	Q9H8Y8	Golgi reassembly-stacking protein 2	GORASP2	sp|Q9H8Y8|GORS2_HUMAN Golgi reassembly-stacking protein 2 OS=Homo sapiens GN=GORASP2 PE=1 SV=3	47145	0	30423	0	0	28814
Q9H993;F5GZY1	Q9H993;F5GZY1	Protein-glutamate O-methyltransferase	ARMT1	sp|Q9H993|ARMT1_HUMAN Protein-glutamate O-methyltransferase OS=Homo sapiens GN=ARMT1 PE=1 SV=1;tr|F5GZY1|F5GZY1_HUMAN Protein-glutamate O-methyltransferase OS=Homo sapiens GN=ARMT1 PE=1 SV=1	51172	0	12604	0	1018400	614760
Q9H9A6	Q9H9A6	Leucine-rich repeat-containing protein 40	LRRC40	sp|Q9H9A6|LRC40_HUMAN Leucine-rich repeat-containing protein 40 OS=Homo sapiens GN=LRRC40 PE=1 SV=1	68249	0	80246	0	151270	207340
Q9H9F9	Q9H9F9	Actin-related protein 5	ACTR5	sp|Q9H9F9|ARP5_HUMAN Actin-related protein 5 OS=Homo sapiens GN=ACTR5 PE=1 SV=2	68297	0.0093823	13824	134170	0	0
Q9HA64;I3L2K8;I3L378;I3L2G3;I3L139	Q9HA64	Ketosamine-3-kinase	FN3KRP	sp|Q9HA64|KT3K_HUMAN Ketosamine-3-kinase OS=Homo sapiens GN=FN3KRP PE=1 SV=2	34412	0	31888	94910	153550	133710
Q9HA65	Q9HA65	TBC1 domain family member 17	TBC1D17	sp|Q9HA65|TBC17_HUMAN TBC1 domain family member 17 OS=Homo sapiens GN=TBC1D17 PE=1 SV=2	72727	0	33644	0	74021	0
Q9HAV4;H0Y9I3	Q9HAV4;H0Y9I3	Exportin-5	XPO5	sp|Q9HAV4|XPO5_HUMAN Exportin-5 OS=Homo sapiens GN=XPO5 PE=1 SV=1;tr|H0Y9I3|H0Y9I3_HUMAN Exportin-5 (Fragment) OS=Homo sapiens GN=XPO5 PE=1 SV=1	136.31	0	3858	0	6022.6	7088
Q9HBI1;A0A087WZB5;B0QYP8	Q9HBI1;A0A087WZB5	Beta-parvin	PARVB	sp|Q9HBI1|PARVB_HUMAN Beta-parvin OS=Homo sapiens GN=PARVB PE=1 SV=1;tr|A0A087WZB5|A0A087WZB5_HUMAN Beta-parvin OS=Homo sapiens GN=PARVB PE=1 SV=1	41714	0	26721	113470	204610	109990
Q9HCC0;D6RD67	Q9HCC0;D6RD67	Methylcrotonoyl-CoA carboxylase beta chain, mitochondrial	MCCC2	sp|Q9HCC0|MCCB_HUMAN Methylcrotonoyl-CoA carboxylase beta chain, mitochondrial OS=Homo sapiens GN=MCCC2 PE=1 SV=1;tr|D6RD67|D6RD67_HUMAN Methylcrotonoyl-CoA carboxylase beta chain, mitochondrial (Fragment) OS=Homo sapiens GN=MCCC2 PE=1 SV=2	61332	0	15775	0	112580	77468
Q9NPC6	Q9NPC6	Myozenin-2	MYOZ2	sp|Q9NPC6|MYOZ2_HUMAN Myozenin-2 OS=Homo sapiens GN=MYOZ2 PE=1 SV=1	29898	0	11946	234040	159010	263920
Q9NPJ3	Q9NPJ3	Acyl-coenzyme A thioesterase 13;Acyl-coenzyme A thioesterase 13, N-terminally processed	ACOT13	sp|Q9NPJ3|ACO13_HUMAN Acyl-coenzyme A thioesterase 13 OS=Homo sapiens GN=ACOT13 PE=1 SV=1	14.96	0	26135	791660	1779400	997320
Q9NQE9	Q9NQE9	Histidine triad nucleotide-binding protein 3	HINT3	sp|Q9NQE9|HINT3_HUMAN Histidine triad nucleotide-binding protein 3 OS=Homo sapiens GN=HINT3 PE=1 SV=1	20361	0.00088889	22971	0	0	96567
Q9NQR4;H7C579;F8WF70	Q9NQR4;H7C579	Omega-amidase NIT2	NIT2	sp|Q9NQR4|NIT2_HUMAN Omega-amidase NIT2 OS=Homo sapiens GN=NIT2 PE=1 SV=1;tr|H7C579|H7C579_HUMAN Omega-amidase NIT2 (Fragment) OS=Homo sapiens GN=NIT2 PE=1 SV=7	30608	0	32995	177560	372600	260970
Q9NR19	Q9NR19	Acetyl-coenzyme A synthetase, cytoplasmic	ACSS2	sp|Q9NR19|ACSA_HUMAN Acetyl-coenzyme A synthetase, cytoplasmic OS=Homo sapiens GN=ACSS2 PE=1 SV=1	78579	0.0024855	17068	0	0	218150
Q9NR31;X1WI22;D6RAA2;Q5SQT8;D6RDB2;D6RD69;Q9Y6B6	Q9NR31;X1WI22;D6RAA2;Q5SQT8;D6RDB2;D6RD69;Q9Y6B6	GTP-binding protein SAR1a;GTP-binding protein SAR1b	SAR1A;SAR1B	sp|Q9NR31|SAR1A_HUMAN GTP-binding protein SAR1a OS=Homo sapiens GN=SAR1A PE=1 SV=1;tr|X1WI22|X1WI22_HUMAN GTP-binding protein SAR1a (Fragment) OS=Homo sapiens GN=SAR1A PE=1 SV=6;tr|D6RAA2|D6RAA2_HUMAN GTP-binding protein SAR1b (Fragment) OS=Homo sapiens GN	22367	0	12873	0	440440	412190
Q9NR45;Q5TBR0;Q5TBR1	Q9NR45	Sialic acid synthase	NANS	sp|Q9NR45|SIAS_HUMAN Sialic acid synthase OS=Homo sapiens GN=NANS PE=1 SV=2	40307	0	42897	123290	135710	117300
Q9NRN7;E9PNF3;E9PLW6	Q9NRN7;E9PNF3;E9PLW6	L-aminoadipate-semialdehyde dehydrogenase-phosphopantetheinyl transferase	AASDHPPT	sp|Q9NRN7|ADPPT_HUMAN L-aminoadipate-semialdehyde dehydrogenase-phosphopantetheinyl transferase OS=Homo sapiens GN=AASDHPPT PE=1 SV=2;tr|E9PNF3|E9PNF3_HUMAN L-aminoadipate-semialdehyde dehydrogenase-phosphopantetheinyl transferase (Fragment) OS=Homo sapien	35776	0	14153	0	118590	119720
Q9NRX4	Q9NRX4	14 kDa phosphohistidine phosphatase	PHPT1	sp|Q9NRX4|PHP14_HUMAN 14 kDa phosphohistidine phosphatase OS=Homo sapiens GN=PHPT1 PE=1 SV=1	13832	0	66184	0	196780	954160
Q9NSD9	Q9NSD9	Phenylalanine--tRNA ligase beta subunit	FARSB	sp|Q9NSD9|SYFB_HUMAN Phenylalanine--tRNA ligase beta subunit OS=Homo sapiens GN=FARSB PE=1 SV=3	66115	0	32016	1276100	1847000	1827400
Q9NTJ4;A0A0C4DGU9;H3BSE5;H3BRI3;H3BQH9;B4DH23	Q9NTJ4	Alpha-mannosidase 2C1	MAN2C1	sp|Q9NTJ4|MA2C1_HUMAN Alpha-mannosidase 2C1 OS=Homo sapiens GN=MAN2C1 PE=1 SV=1	115.83	0	35832	0	768750	694560
Q9NUJ1	Q9NUJ1	Mycophenolic acid acyl-glucuronide esterase, mitochondrial	ABHD10	sp|Q9NUJ1|ABHDA_HUMAN Mycophenolic acid acyl-glucuronide esterase, mitochondrial OS=Homo sapiens GN=ABHD10 PE=1 SV=1	33932	0	44926	0	283380	128420
Q9NXA8	Q9NXA8	NAD-dependent protein deacylase sirtuin-5, mitochondrial	SIRT5	sp|Q9NXA8|SIR5_HUMAN NAD-dependent protein deacylase sirtuin-5, mitochondrial OS=Homo sapiens GN=SIRT5 PE=1 SV=2	33881	0	32088	196590	367200	328150
Q9NZ08	Q9NZ08	Endoplasmic reticulum aminopeptidase 1	ERAP1	sp|Q9NZ08|ERAP1_HUMAN Endoplasmic reticulum aminopeptidase 1 OS=Homo sapiens GN=ERAP1 PE=1 SV=3	107.23	0.00090744	24884	0	16139	0
Q9NZA1	Q9NZA1	Chloride intracellular channel protein 5	CLIC5	sp|Q9NZA1|CLIC5_HUMAN Chloride intracellular channel protein 5 OS=Homo sapiens GN=CLIC5 PE=1 SV=3	46502	0.0017153	20918	0	0	116440
Q9NZL4;K7EN20;K7EMM7;K7EL16	Q9NZL4;K7EN20	Hsp70-binding protein 1	HSPBP1	sp|Q9NZL4|HPBP1_HUMAN Hsp70-binding protein 1 OS=Homo sapiens GN=HSPBP1 PE=1 SV=1;tr|K7EN20|K7EN20_HUMAN Hsp70-binding protein 1 (Fragment) OS=Homo sapiens GN=HSPBP1 PE=1 SV=1	39474	0	95923	0	154430	376830
Q9NZL9;E5RJR3;H7C0X7	Q9NZL9	Methionine adenosyltransferase 2 subunit beta	MAT2B	sp|Q9NZL9|MAT2B_HUMAN Methionine adenosyltransferase 2 subunit beta OS=Homo sapiens GN=MAT2B PE=1 SV=1	37551	0	21172	213210	289490	264780
Q9NZN4	Q9NZN4	EH domain-containing protein 2	EHD2	sp|Q9NZN4|EHD2_HUMAN EH domain-containing protein 2 OS=Homo sapiens GN=EHD2 PE=1 SV=2	61161	0	103.51	5275500	3045900	2919900
Q9NZT1	Q9NZT1	Calmodulin-like protein 5	CALML5	sp|Q9NZT1|CALL5_HUMAN Calmodulin-like protein 5 OS=Homo sapiens GN=CALML5 PE=1 SV=2	15892	0.0092879	13327	422110	0	0
Q9P291	Q9P291	Armadillo repeat-containing X-linked protein 1	ARMCX1	sp|Q9P291|ARMX1_HUMAN Armadillo repeat-containing X-linked protein 1 OS=Homo sapiens GN=ARMCX1 PE=1 SV=1	49.18	0.0071713	14595	0	0	8900.8
Q9P2B2	Q9P2B2	Prostaglandin F2 receptor negative regulator	PTGFRN	sp|Q9P2B2|FPRP_HUMAN Prostaglandin F2 receptor negative regulator OS=Homo sapiens GN=PTGFRN PE=1 SV=2	98555	0	26446	4900200	1196400	702720
Q9P2J5	Q9P2J5	Leucine--tRNA ligase, cytoplasmic	LARS	sp|Q9P2J5|SYLC_HUMAN Leucine--tRNA ligase, cytoplasmic OS=Homo sapiens GN=LARS PE=1 SV=2	134.46	0	26065	0	258120	181640
Q9P2R3;K7EPT2	Q9P2R3	Rabankyrin-5	ANKFY1	sp|Q9P2R3|ANFY1_HUMAN Rabankyrin-5 OS=Homo sapiens GN=ANKFY1 PE=1 SV=2	128.4	0	39805	0	201390	154250
Q9P2R7;Q5T9Q5;A0A0U1RQF8;A0A0U1RRI1;Q5T9Q8;A0A0U1RQL1;A0A0U1RQU7	Q9P2R7;Q5T9Q5;A0A0U1RQF8	Succinyl-CoA ligase [ADP-forming] subunit beta, mitochondrial	SUCLA2	sp|Q9P2R7|SUCB1_HUMAN Succinyl-CoA ligase [ADP-forming] subunit beta, mitochondrial OS=Homo sapiens GN=SUCLA2 PE=1 SV=3;tr|Q5T9Q5|Q5T9Q5_HUMAN Succinyl-CoA ligase [ADP-forming] subunit beta, mitochondrial (Fragment) OS=Homo sapiens GN=SUCLA2 PE=1 SV=1;tr|A	50317	0	13.27	118380	553690	422440
Q9UBB4	Q9UBB4	Ataxin-10	ATXN10	sp|Q9UBB4|ATX10_HUMAN Ataxin-10 OS=Homo sapiens GN=ATXN10 PE=1 SV=1	53488	0	6047	0	0	75540
Q9UBG0	Q9UBG0	C-type mannose receptor 2	MRC2	sp|Q9UBG0|MRC2_HUMAN C-type mannose receptor 2 OS=Homo sapiens GN=MRC2 PE=1 SV=2	166.67	0	54385	0	0	27544
Q9UBI1;R4GN06;Q5T8Z1;R4GNF2;R4GN54;H0Y4E5;R4GMW6;H0Y4W0;H0Y6Z9;R4GMX3	Q9UBI1;R4GN06;Q5T8Z1;R4GNF2;R4GN54;H0Y4E5;R4GMW6;H0Y4W0;H0Y6Z9;R4GMX3	COMM domain-containing protein 3	COMMD3;COMMD3-BMI1	sp|Q9UBI1|COMD3_HUMAN COMM domain-containing protein 3 OS=Homo sapiens GN=COMMD3 PE=1 SV=1;tr|R4GN06|R4GN06_HUMAN COMM domain-containing protein 3 (Fragment) OS=Homo sapiens GN=COMMD3 PE=4 SV=1;tr|Q5T8Z1|Q5T8Z1_HUMAN Protein COMMD3-BMI1 (Fragment) OS=Homo	22151	0	11492	0	37393	43933
Q9UBI6	Q9UBI6	Guanine nucleotide-binding protein G(I)/G(S)/G(O) subunit gamma-12	GNG12	sp|Q9UBI6|GBG12_HUMAN Guanine nucleotide-binding protein G(I)/G(S)/G(O) subunit gamma-12 OS=Homo sapiens GN=GNG12 PE=1 SV=3	80061	0	40135	0	0	79633
Q9UBQ5;K7ES31;K7ERF1;B4DQ48;K7EK53;K7EQM4;A0A087WVB9	Q9UBQ5;K7ES31;K7ERF1	Eukaryotic translation initiation factor 3 subunit K	EIF3K	sp|Q9UBQ5|EIF3K_HUMAN Eukaryotic translation initiation factor 3 subunit K OS=Homo sapiens GN=EIF3K PE=1 SV=1;tr|K7ES31|K7ES31_HUMAN Eukaryotic translation initiation factor 3 subunit K OS=Homo sapiens GN=EIF3K PE=1 SV=1;tr|K7ERF1|K7ERF1_HUMAN Eukaryotic t	25059	0	71425	123370	723610	1212000
Q9UBQ7;U3KQ56	Q9UBQ7;U3KQ56	Glyoxylate reductase/hydroxypyruvate reductase	GRHPR	sp|Q9UBQ7|GRHPR_HUMAN Glyoxylate reductase/hydroxypyruvate reductase OS=Homo sapiens GN=GRHPR PE=1 SV=1;tr|U3KQ56|U3KQ56_HUMAN Glyoxylate reductase/hydroxypyruvate reductase OS=Homo sapiens GN=GRHPR PE=1 SV=1	35668	0	117.74	379640	2369300	1779400
Q9UDY4	Q9UDY4	DnaJ homolog subfamily B member 4	DNAJB4	sp|Q9UDY4|DNJB4_HUMAN DnaJ homolog subfamily B member 4 OS=Homo sapiens GN=DNAJB4 PE=1 SV=1	37806	0	42216	0	67338	91761
Q9UGI0	Q9UGI0	Ubiquitin thioesterase ZRANB1	ZRANB1	sp|Q9UGI0|ZRAN1_HUMAN Ubiquitin thioesterase ZRANB1 OS=Homo sapiens GN=ZRANB1 PE=1 SV=2	80966	0	4317	1180000	0	0
Q9UGT4	Q9UGT4	Sushi domain-containing protein 2	SUSD2	sp|Q9UGT4|SUSD2_HUMAN Sushi domain-containing protein 2 OS=Homo sapiens GN=SUSD2 PE=1 SV=1	90207	0	77337	0	0	20344
Q9UHG3	Q9UHG3	Prenylcysteine oxidase 1	PCYOX1	sp|Q9UHG3|PCYOX_HUMAN Prenylcysteine oxidase 1 OS=Homo sapiens GN=PCYOX1 PE=1 SV=3	56639	0	28207	0	0	9022.5
Q9UI47;E5RGY7	Q9UI47	Catenin alpha-3	CTNNA3	sp|Q9UI47|CTNA3_HUMAN Catenin alpha-3 OS=Homo sapiens GN=CTNNA3 PE=1 SV=2	99808	0	87539	0	98648	189700
Q9UIJ7	Q9UIJ7	GTP:AMP phosphotransferase AK3, mitochondrial	AK3	sp|Q9UIJ7|KAD3_HUMAN GTP:AMP phosphotransferase AK3, mitochondrial OS=Homo sapiens GN=AK3 PE=1 SV=4	25565	0	57664	934040	1774100	1026100
Q9UIQ6	Q9UIQ6	Leucyl-cystinyl aminopeptidase;Leucyl-cystinyl aminopeptidase, pregnancy serum form	LNPEP	sp|Q9UIQ6|LCAP_HUMAN Leucyl-cystinyl aminopeptidase OS=Homo sapiens GN=LNPEP PE=1 SV=3	117.35	0.00090171	24451	0	0	3719.5
Q9UKG1	Q9UKG1	DCC-interacting protein 13-alpha	APPL1	sp|Q9UKG1|DP13A_HUMAN DCC-interacting protein 13-alpha OS=Homo sapiens GN=APPL1 PE=1 SV=1	79663	0	33823	0	37336	115660
Q9UKK3	Q9UKK3	Poly [ADP-ribose] polymerase 4	PARP4	sp|Q9UKK3|PARP4_HUMAN Poly [ADP-ribose] polymerase 4 OS=Homo sapiens GN=PARP4 PE=1 SV=3	192.59	0.00087489	21972	0	7734.7	0
Q9UL25	Q9UL25	Ras-related protein Rab-21	RAB21	sp|Q9UL25|RAB21_HUMAN Ras-related protein Rab-21 OS=Homo sapiens GN=RAB21 PE=1 SV=3	24347	0	36899	0	438370	888570
Q9ULC3	Q9ULC3	Ras-related protein Rab-23	RAB23	sp|Q9ULC3|RAB23_HUMAN Ras-related protein Rab-23 OS=Homo sapiens GN=RAB23 PE=1 SV=1	26659	0.0017286	21261	0	0	93681
Q9ULC4	Q9ULC4	Malignant T-cell-amplified sequence 1	MCTS1	sp|Q9ULC4|MCTS1_HUMAN Malignant T-cell-amplified sequence 1 OS=Homo sapiens GN=MCTS1 PE=1 SV=1	20555	0	44808	0	125590	242490
Q9UNM6;A0A087WUL9;J3KNQ3;E9PL38;H0YD73;E9PQG3;E9PPD2	Q9UNM6;A0A087WUL9;J3KNQ3;E9PL38	26S proteasome non-ATPase regulatory subunit 13	PSMD13	sp|Q9UNM6|PSD13_HUMAN 26S proteasome non-ATPase regulatory subunit 13 OS=Homo sapiens GN=PSMD13 PE=1 SV=2;tr|A0A087WUL9|A0A087WUL9_HUMAN 26S proteasome non-ATPase regulatory subunit 13 OS=Homo sapiens GN=PSMD13 PE=1 SV=1;tr|J3KNQ3|J3KNQ3_HUMAN 26S proteaso	42945	0	48936	393100	1466600	1857000
Q9UNS2;H7C3P9;J3QL22;J3QS85;J3KTQ1;J3QKR0;C9JLV5	Q9UNS2;H7C3P9	COP9 signalosome complex subunit 3	COPS3	sp|Q9UNS2|CSN3_HUMAN COP9 signalosome complex subunit 3 OS=Homo sapiens GN=COPS3 PE=1 SV=3;tr|H7C3P9|H7C3P9_HUMAN COP9 signalosome complex subunit 3 OS=Homo sapiens GN=COPS3 PE=1 SV=2	47873	0	45748	219780	187860	288830
Q9UP83	Q9UP83	Conserved oligomeric Golgi complex subunit 5	COG5	sp|Q9UP83|COG5_HUMAN Conserved oligomeric Golgi complex subunit 5 OS=Homo sapiens GN=COG5 PE=1 SV=3	92742	0	34304	0	0	17863
Q9UPU5	Q9UPU5	Ubiquitin carboxyl-terminal hydrolase 24	USP24	sp|Q9UPU5|UBP24_HUMAN Ubiquitin carboxyl-terminal hydrolase 24 OS=Homo sapiens GN=USP24 PE=1 SV=3	294.36	0	60803	0	74785	123330
Q9UQ80;F8VR77	Q9UQ80;F8VR77	Proliferation-associated protein 2G4	PA2G4	sp|Q9UQ80|PA2G4_HUMAN Proliferation-associated protein 2G4 OS=Homo sapiens GN=PA2G4 PE=1 SV=3;tr|F8VR77|F8VR77_HUMAN Proliferation-associated protein 2G4 OS=Homo sapiens GN=PA2G4 PE=1 SV=1	43786	0	14103	109400	188270	175820
Q9Y224;H0YJB9;G3V4C6	Q9Y224	UPF0568 protein C14orf166	C14orf166	sp|Q9Y224|CN166_HUMAN UPF0568 protein C14orf166 OS=Homo sapiens GN=C14orf166 PE=1 SV=1	28068	0	53315	0	59644	18259
Q9Y230;M0R0Y3;M0QXI6;X6R2L4	Q9Y230;M0R0Y3;M0QXI6;X6R2L4	RuvB-like 2	RUVBL2	sp|Q9Y230|RUVB2_HUMAN RuvB-like 2 OS=Homo sapiens GN=RUVBL2 PE=1 SV=3;tr|M0R0Y3|M0R0Y3_HUMAN RuvB-like helicase OS=Homo sapiens GN=RUVBL2 PE=1 SV=1;tr|M0QXI6|M0QXI6_HUMAN RuvB-like helicase (Fragment) OS=Homo sapiens GN=RUVBL2 PE=1 SV=1;tr|X6R2L4|X6R2L4_HU	51156	0	19821	0	188740	301420
Q9Y235	Q9Y235	Probable C->U-editing enzyme APOBEC-2	APOBEC2	sp|Q9Y235|ABEC2_HUMAN C->U-editing enzyme APOBEC-2 OS=Homo sapiens GN=APOBEC2 PE=1 SV=1	25703	0	38796	0	287250	272170
Q9Y263	Q9Y263	Phospholipase A-2-activating protein	PLAA	sp|Q9Y263|PLAP_HUMAN Phospholipase A-2-activating protein OS=Homo sapiens GN=PLAA PE=1 SV=2	87156	0.0017079	20292	0	0	9028.6
Q9Y265;E7ETR0;H7C4G5;J3QLR1;H7C4I3	Q9Y265;E7ETR0;H7C4G5;J3QLR1	RuvB-like 1	RUVBL1	sp|Q9Y265|RUVB1_HUMAN RuvB-like 1 OS=Homo sapiens GN=RUVBL1 PE=1 SV=1;tr|E7ETR0|E7ETR0_HUMAN RuvB-like helicase OS=Homo sapiens GN=RUVBL1 PE=1 SV=1;tr|H7C4G5|H7C4G5_HUMAN RuvB-like helicase (Fragment) OS=Homo sapiens GN=RUVBL1 PE=1 SV=1;tr|J3QLR1|J3QLR1_HU	50227	0	31466	112410	266930	431960
Q9Y281;F8WDN3	Q9Y281	Cofilin-2	CFL2	sp|Q9Y281|COF2_HUMAN Cofilin-2 OS=Homo sapiens GN=CFL2 PE=1 SV=1	18736	0	137.74	809080	1084700	1252100
Q9Y295	Q9Y295	Developmentally-regulated GTP-binding protein 1	DRG1	sp|Q9Y295|DRG1_HUMAN Developmentally-regulated GTP-binding protein 1 OS=Homo sapiens GN=DRG1 PE=1 SV=1	40542	0	33234	0	0	22275
Q9Y2A7	Q9Y2A7	Nck-associated protein 1	NCKAP1	sp|Q9Y2A7|NCKP1_HUMAN Nck-associated protein 1 OS=Homo sapiens GN=NCKAP1 PE=1 SV=1	128.79	0.0087094	14433	0	17129	0
Q9Y2H1;H0YGN4;I3L0D0;F5H7Z3;F5GY51;F5H277	Q9Y2H1	Serine/threonine-protein kinase 38-like	STK38L	sp|Q9Y2H1|ST38L_HUMAN Serine/threonine-protein kinase 38-like OS=Homo sapiens GN=STK38L PE=1 SV=3	54002	0	95524	101330	165900	360780
Q9Y2S2;A0A087WW38	Q9Y2S2;A0A087WW38	Lambda-crystallin homolog	CRYL1	sp|Q9Y2S2|CRYL1_HUMAN Lambda-crystallin homolog OS=Homo sapiens GN=CRYL1 PE=1 SV=3;tr|A0A087WW38|A0A087WW38_HUMAN Lambda-crystallin homolog (Fragment) OS=Homo sapiens GN=CRYL1 PE=1 SV=1	35419	0	14316	0	193690	453650
Q9Y316	Q9Y316	Protein MEMO1	MEMO1	sp|Q9Y316|MEMO1_HUMAN Protein MEMO1 OS=Homo sapiens GN=MEMO1 PE=1 SV=1	33733	0	20797	0	670910	595900
Q9Y3C6	Q9Y3C6	Peptidyl-prolyl cis-trans isomerase-like 1	PPIL1	sp|Q9Y3C6|PPIL1_HUMAN Peptidyl-prolyl cis-trans isomerase-like 1 OS=Homo sapiens GN=PPIL1 PE=1 SV=1	18237	0	78029	0	332810	491300
Q9Y3D6	Q9Y3D6	Mitochondrial fission 1 protein	FIS1	sp|Q9Y3D6|FIS1_HUMAN Mitochondrial fission 1 protein OS=Homo sapiens GN=FIS1 PE=1 SV=2	16937	0.0086546	14011	0	0	17131
Q9Y3F4;H0YH33	Q9Y3F4	Serine-threonine kinase receptor-associated protein	STRAP	sp|Q9Y3F4|STRAP_HUMAN Serine-threonine kinase receptor-associated protein OS=Homo sapiens GN=STRAP PE=1 SV=1	38438	0	36.1	0	779260	550960
Q9Y3I0	Q9Y3I0	tRNA-splicing ligase RtcB homolog	RTCB	sp|Q9Y3I0|RTCB_HUMAN tRNA-splicing ligase RtcB homolog OS=Homo sapiens GN=RTCB PE=1 SV=1	55.21	0	23284	1299000	1141600	857200
Q9Y3Z3	Q9Y3Z3	Deoxynucleoside triphosphate triphosphohydrolase SAMHD1	SAMHD1	sp|Q9Y3Z3|SAMH1_HUMAN Deoxynucleoside triphosphate triphosphohydrolase SAMHD1 OS=Homo sapiens GN=SAMHD1 PE=1 SV=2	72.2	0.00090009	24324	0	0	127880
Q9Y490	Q9Y490	Talin-1	TLN1	sp|Q9Y490|TLN1_HUMAN Talin-1 OS=Homo sapiens GN=TLN1 PE=1 SV=3	269.76	0	212.71	887230	1223200	1402000
Q9Y4E8	Q9Y4E8	Ubiquitin carboxyl-terminal hydrolase 15	USP15	sp|Q9Y4E8|UBP15_HUMAN Ubiquitin carboxyl-terminal hydrolase 15 OS=Homo sapiens GN=USP15 PE=1 SV=3	112.42	0	50891	0	106590	78400
Q9Y4G6;H0YMT1;H0YN01	Q9Y4G6;H0YMT1	Talin-2	TLN2	sp|Q9Y4G6|TLN2_HUMAN Talin-2 OS=Homo sapiens GN=TLN2 PE=1 SV=4;tr|H0YMT1|H0YMT1_HUMAN Talin-2 (Fragment) OS=Homo sapiens GN=TLN2 PE=1 SV=1	271.61	0	40406	0	84964	197030
Q9Y4J8;K7ERZ2;K7ESB2;K7EJ84	Q9Y4J8;K7ERZ2;K7ESB2;K7EJ84	Dystrobrevin alpha	DTNA	sp|Q9Y4J8|DTNA_HUMAN Dystrobrevin alpha OS=Homo sapiens GN=DTNA PE=1 SV=2;tr|K7ERZ2|K7ERZ2_HUMAN Dystrobrevin alpha (Fragment) OS=Homo sapiens GN=DTNA PE=1 SV=1;tr|K7ESB2|K7ESB2_HUMAN Dystrobrevin alpha (Fragment) OS=Homo sapiens GN=DTNA PE=1 SV=1;tr|K7EJ8	83.9	0	116.53	0	1099400	2017800
Q9Y5P6	Q9Y5P6	Mannose-1-phosphate guanyltransferase beta	GMPPB	sp|Q9Y5P6|GMPPB_HUMAN Mannose-1-phosphate guanyltransferase beta OS=Homo sapiens GN=GMPPB PE=1 SV=2	39834	0	12493	163660	256870	808340
Q9Y678;Q9UBF2	Q9Y678	Coatomer subunit gamma-1	COPG1	sp|Q9Y678|COPG1_HUMAN Coatomer subunit gamma-1 OS=Homo sapiens GN=COPG1 PE=1 SV=1	97717	0	11587	0	134810	90631
Q9Y696;Q96NY7	Q9Y696	Chloride intracellular channel protein 4	CLIC4	sp|Q9Y696|CLIC4_HUMAN Chloride intracellular channel protein 4 OS=Homo sapiens GN=CLIC4 PE=1 SV=4	28772	0	36084	624890	1143200	788820
V9GY10	V9GY10		POT1	tr|V9GY10|V9GY10_HUMAN Protection of telomeres protein 1 (Fragment) OS=Homo sapiens GN=POT1 PE=1 SV=1	90455	0.0056864	15626	76895	0	0
